# Supplementary material for: Global Evolutionary History and Dynamics of Dengue Viruses Inferred from Whole Genome Sequences
Source: MDPI journal article supplement (doi:10.3390/v14040703), 2022-03-28

**Supplemental Figure S1: DENV1 Whole Genome ML Trees.** (a) DENV1 Whole Genome ML tree, (b) Genotype 1-I, (c) Genotype 1-IV, (d) Genotype 1-V (isolates incorrectly classified as 1-III indicated by arrows) and sylvatic. aLRT SH-like branch support indicated for the major branches. Support values >0.8 have been eliminated in most instances for clarity. Red circles/font indicate newly sequenced isolates from the QUT Arbovirus collection. Branches under positive selection (see section 3.2.2) are indicated by a red star.

Figure S1a

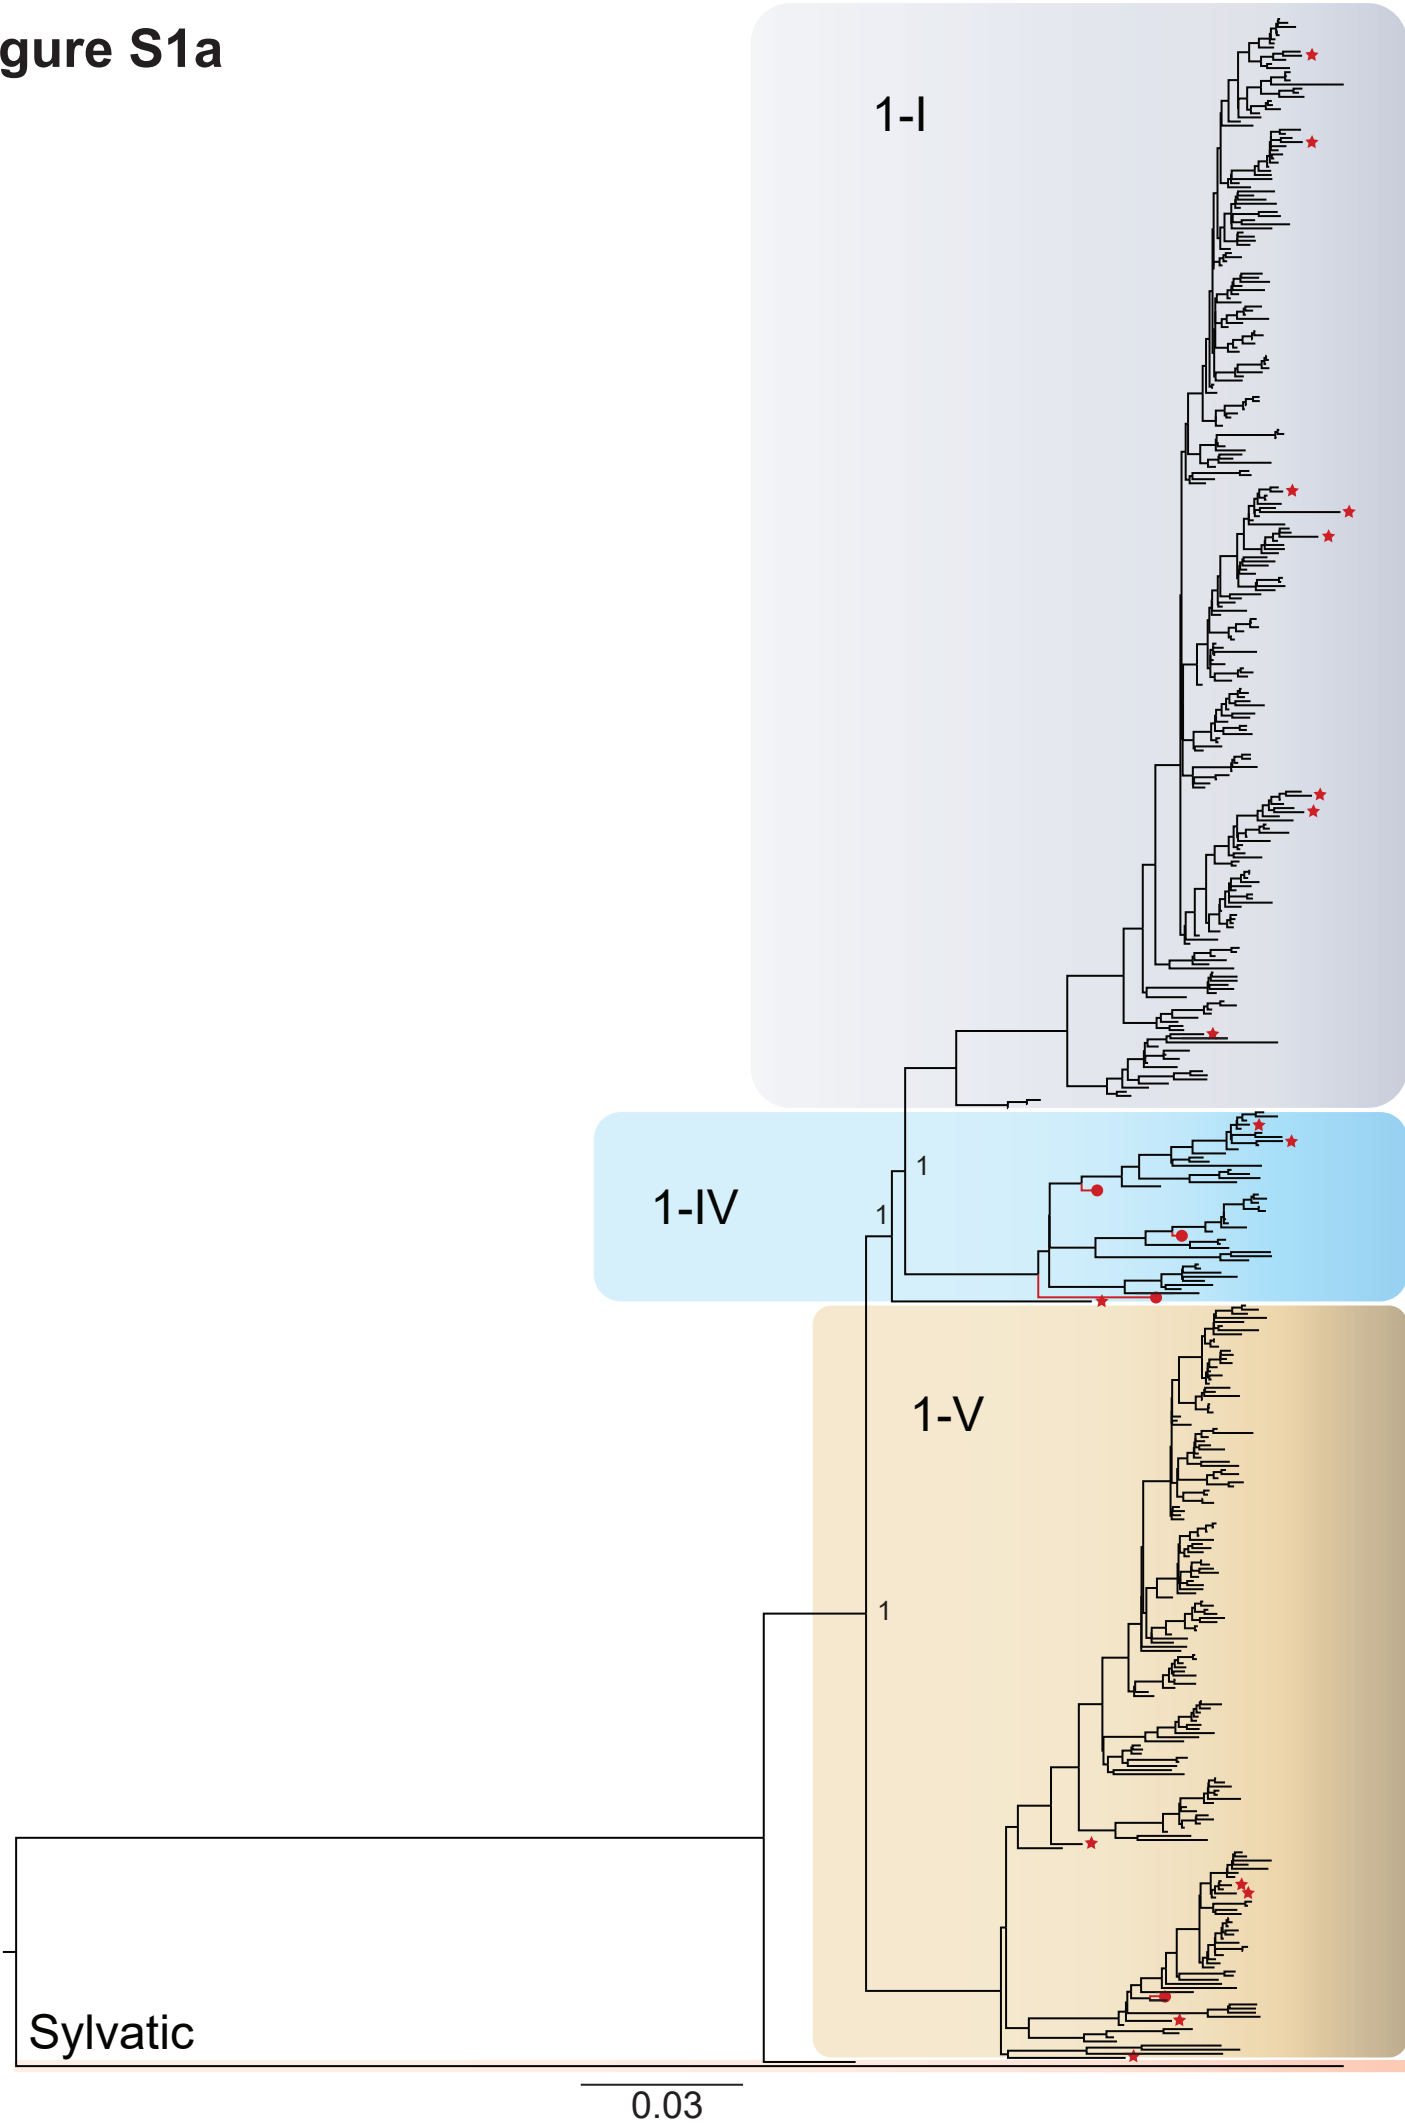

Figure S1b

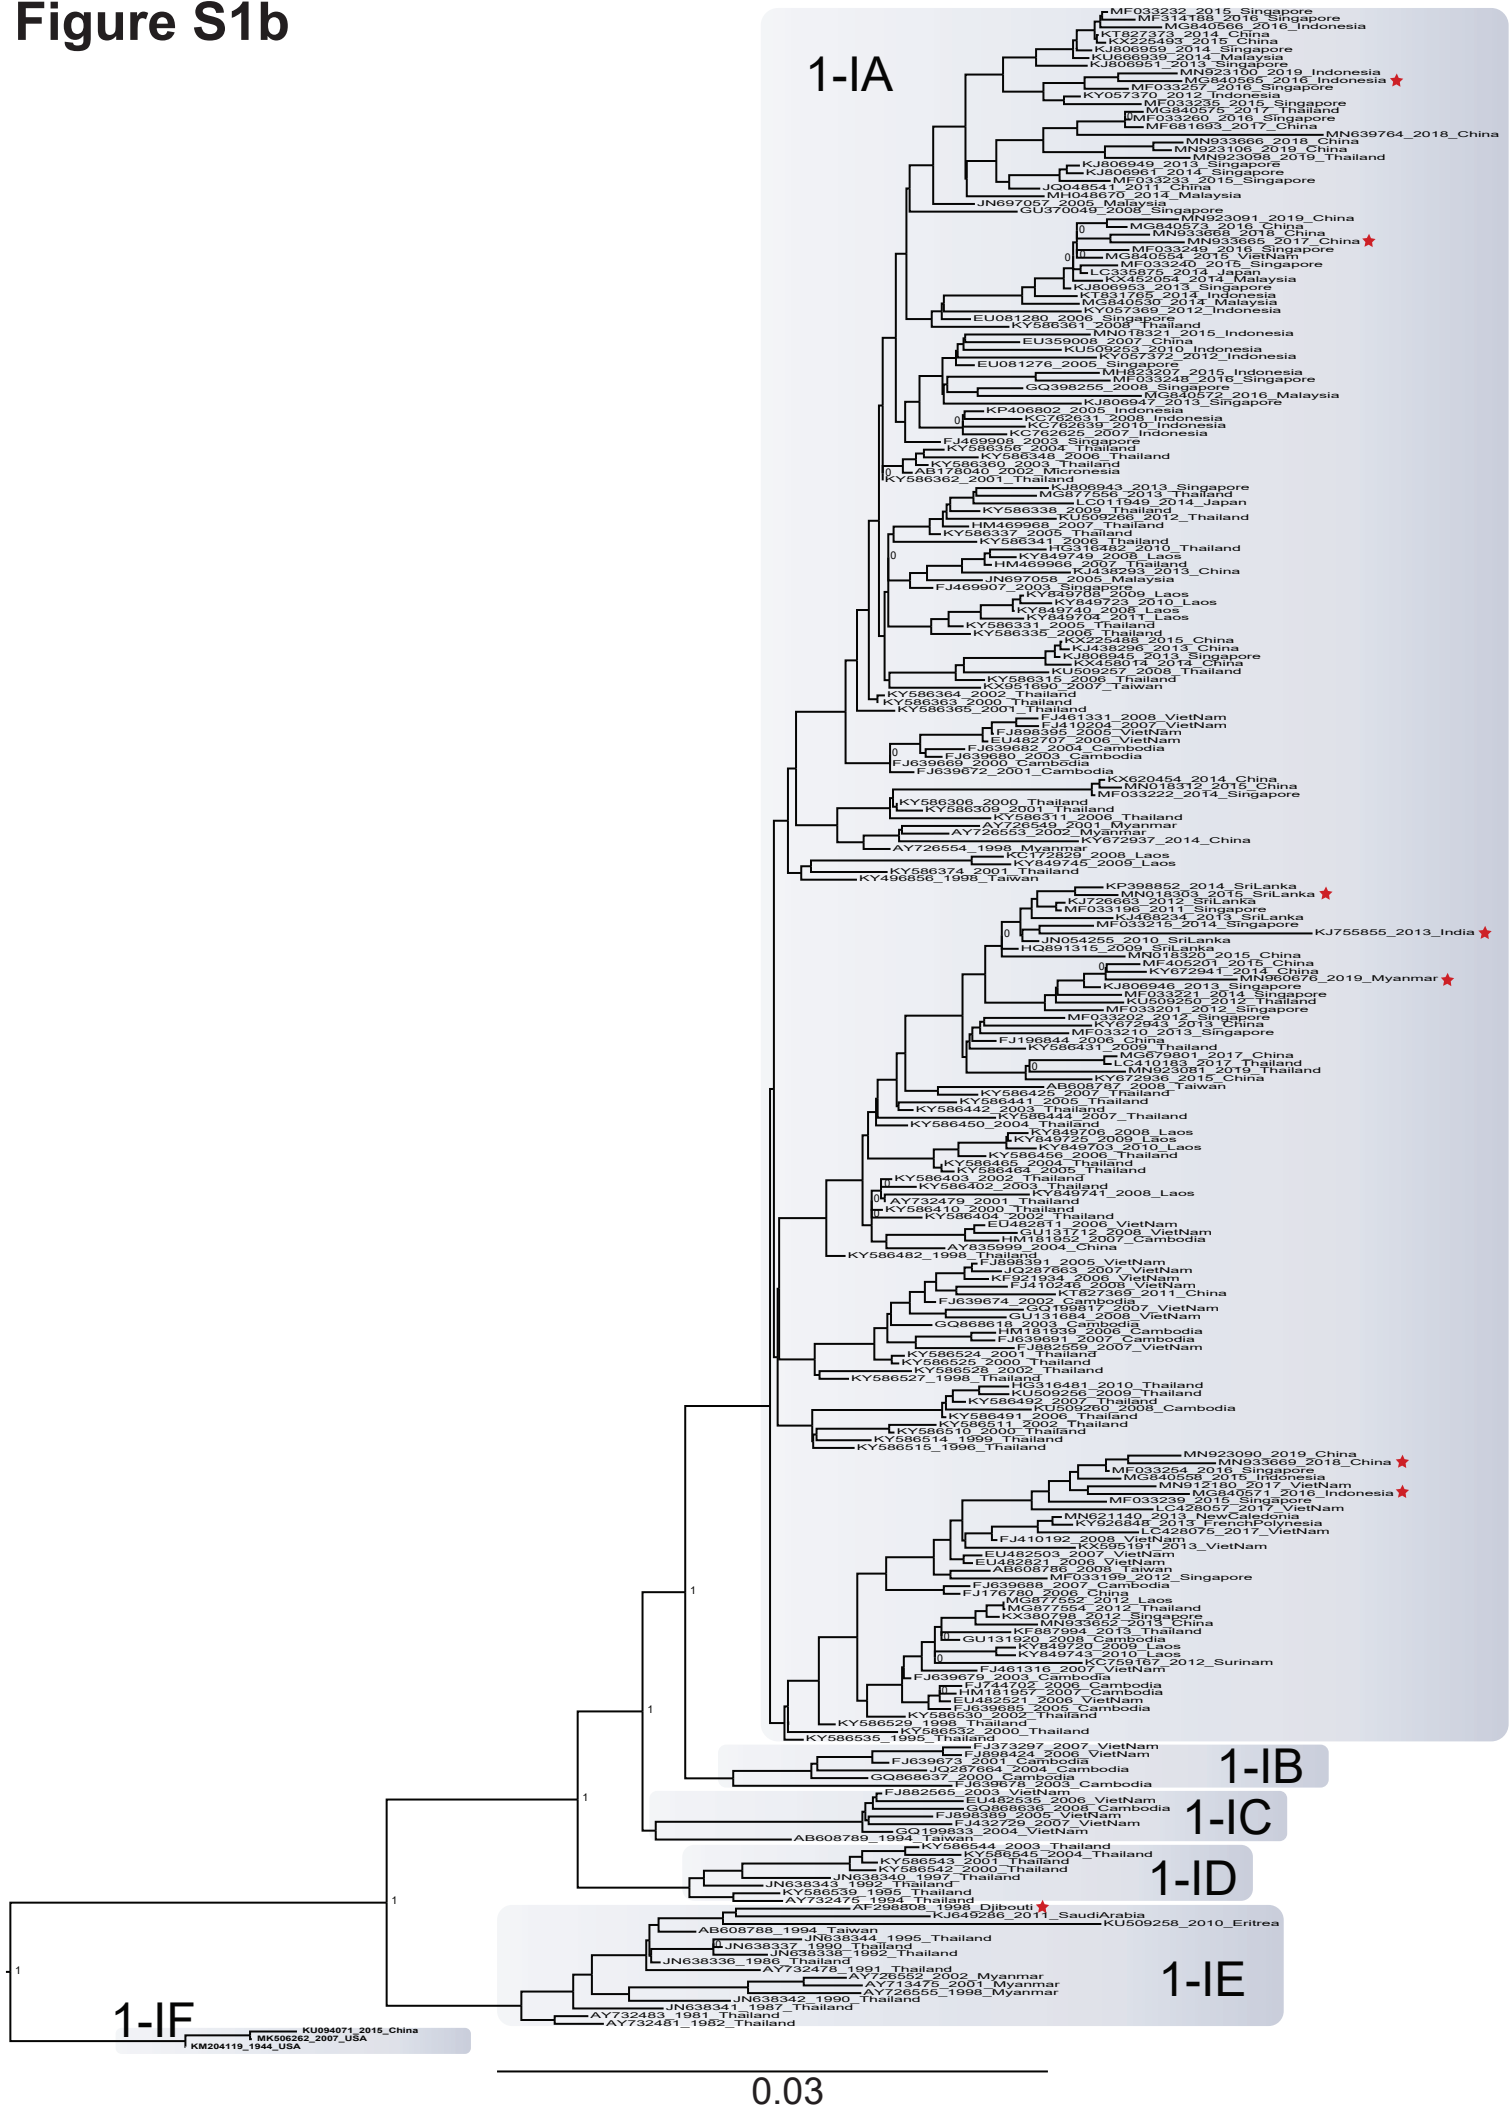

Figure S1c

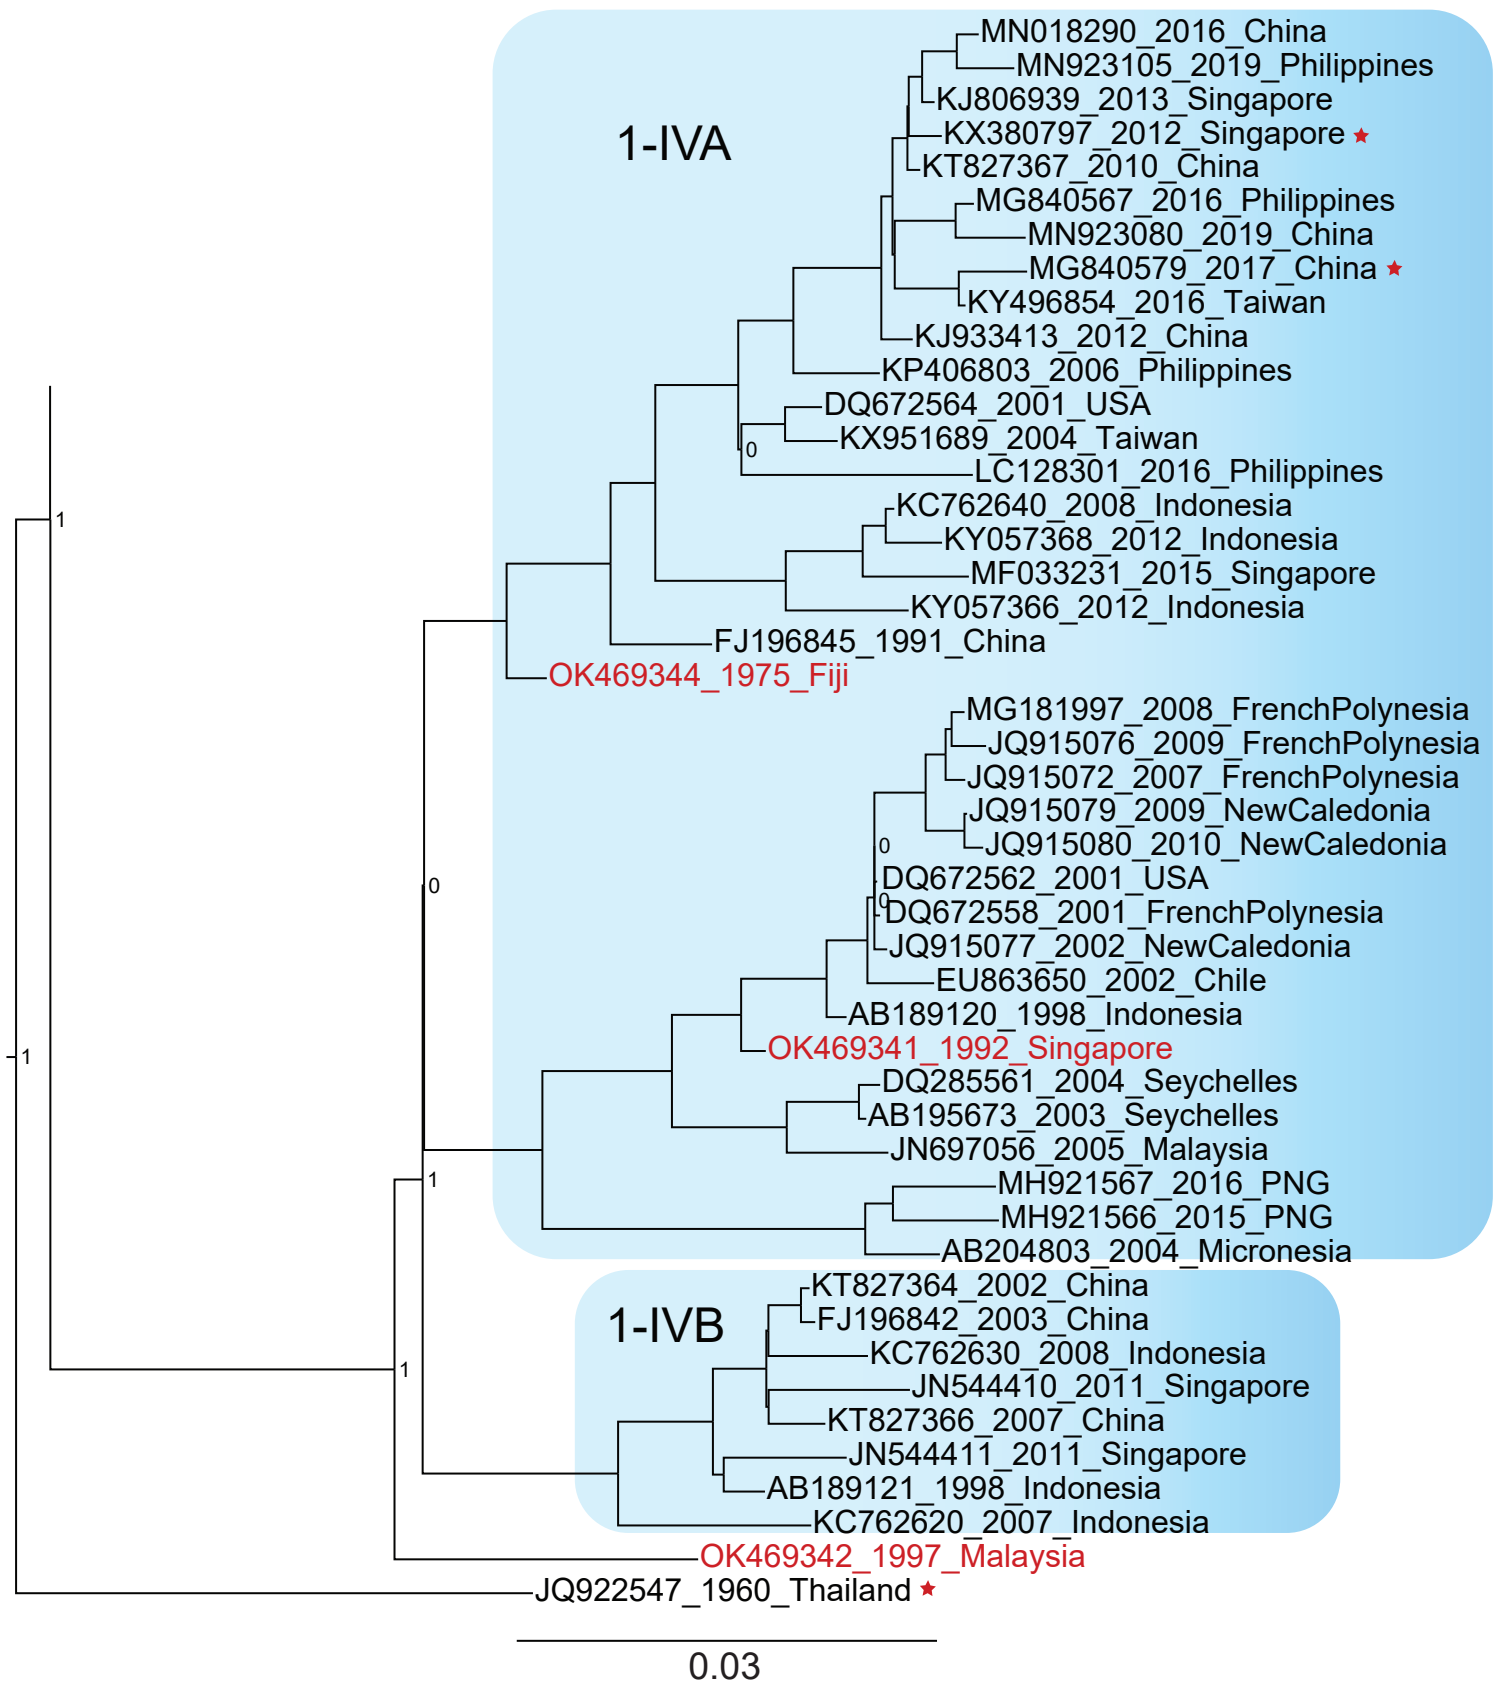

Figure S1d

Sylvatic

EF457905\_1972\_Malaysia

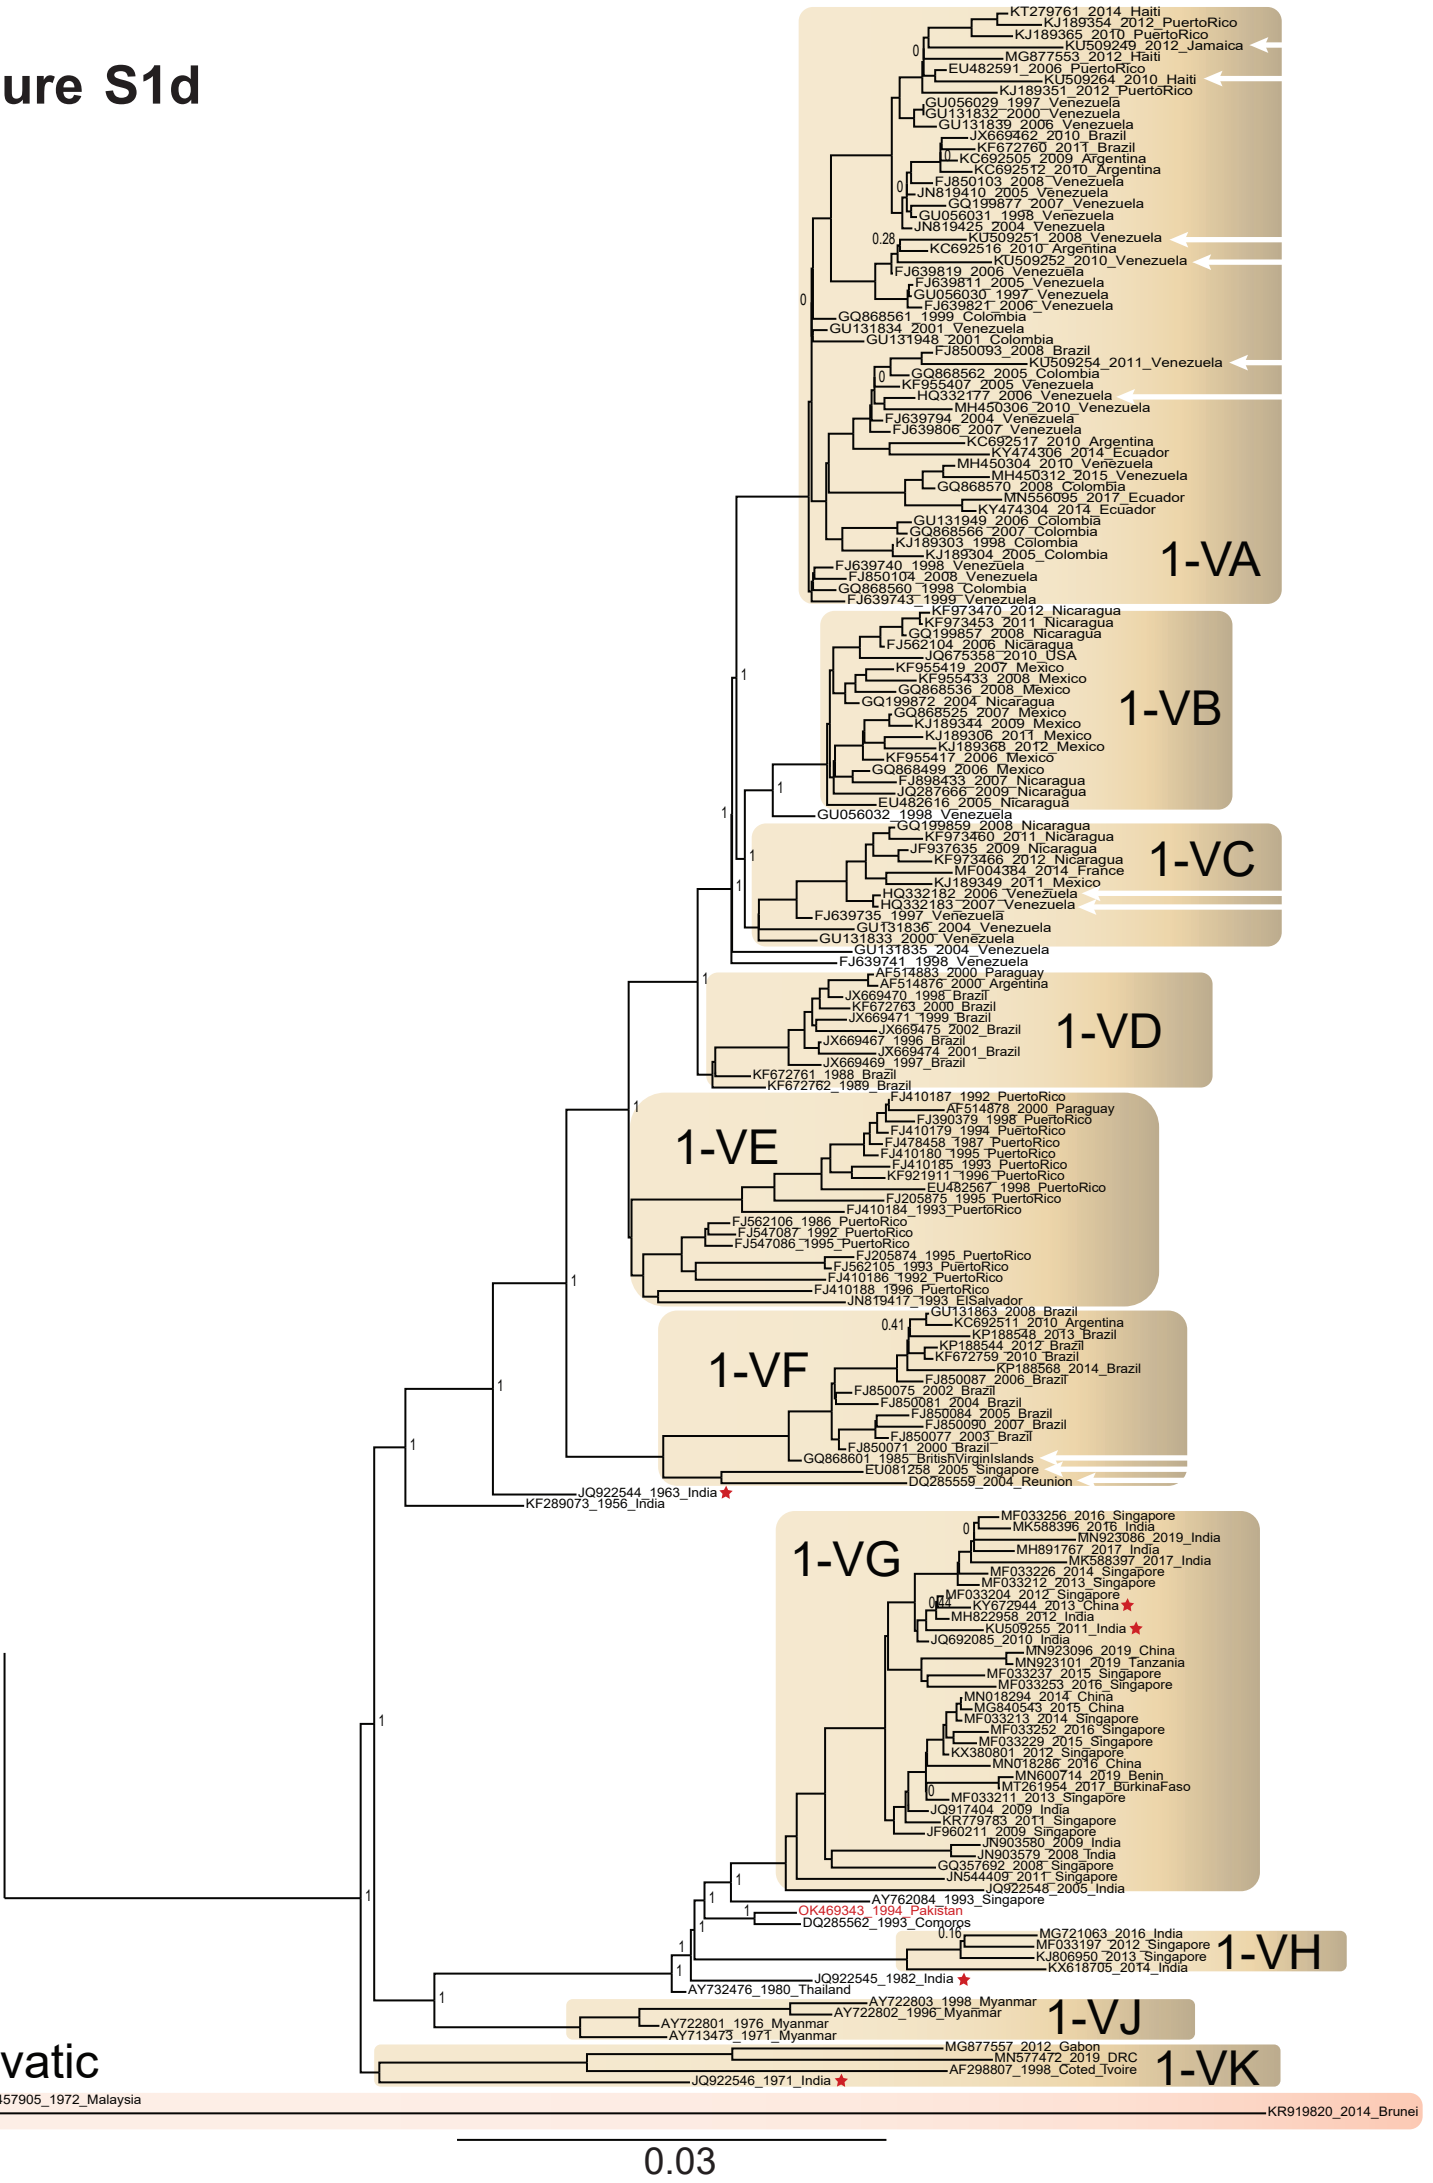

0.03

**Supplemental Figure S2: DENV1 E Gene ML Trees.** (a) DENV1 E gene ML tree, (b) Genotype 1-I, (c) Genotype 1-IV, (d) Genotype 1-V (isolates incorrectly classified as 1-III indicated by arrows) and sylvatic. aLRT SH-like branch support indicated for the major branches. Support values >0.8 have been eliminated in most instances for clarity. Red circles/font indicate newly sequenced isolates from the QUT Arbovirus collection. Branches under positive selection (see section 3.2.2) are indicated by a red star.

Figure S2a

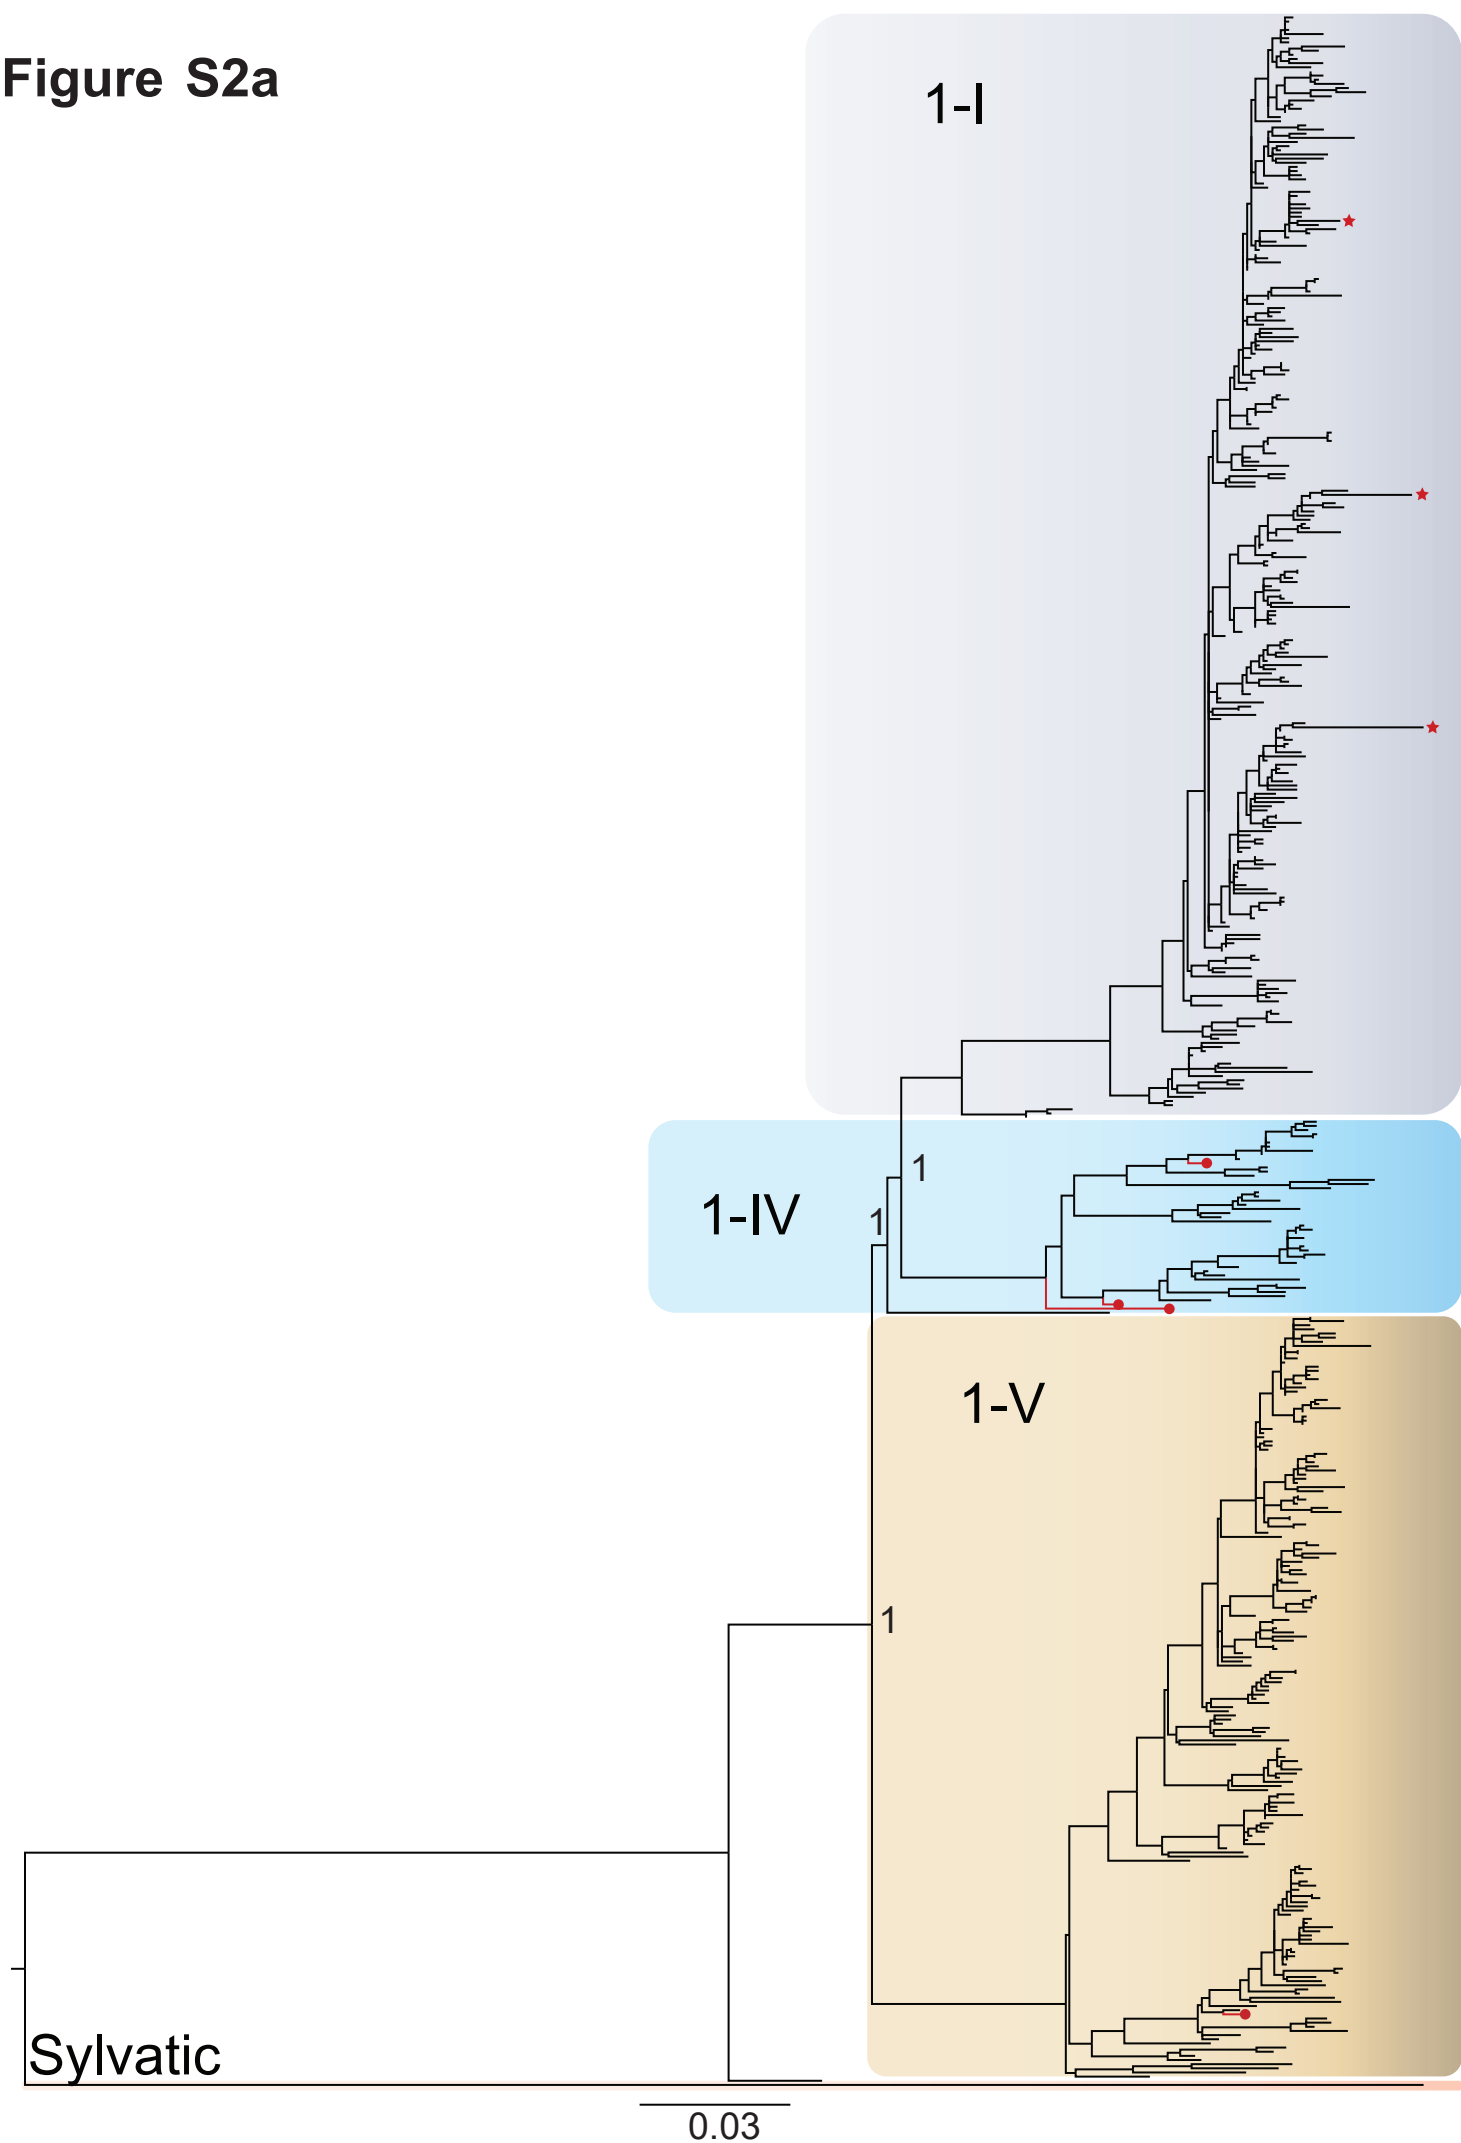

Figure S2b

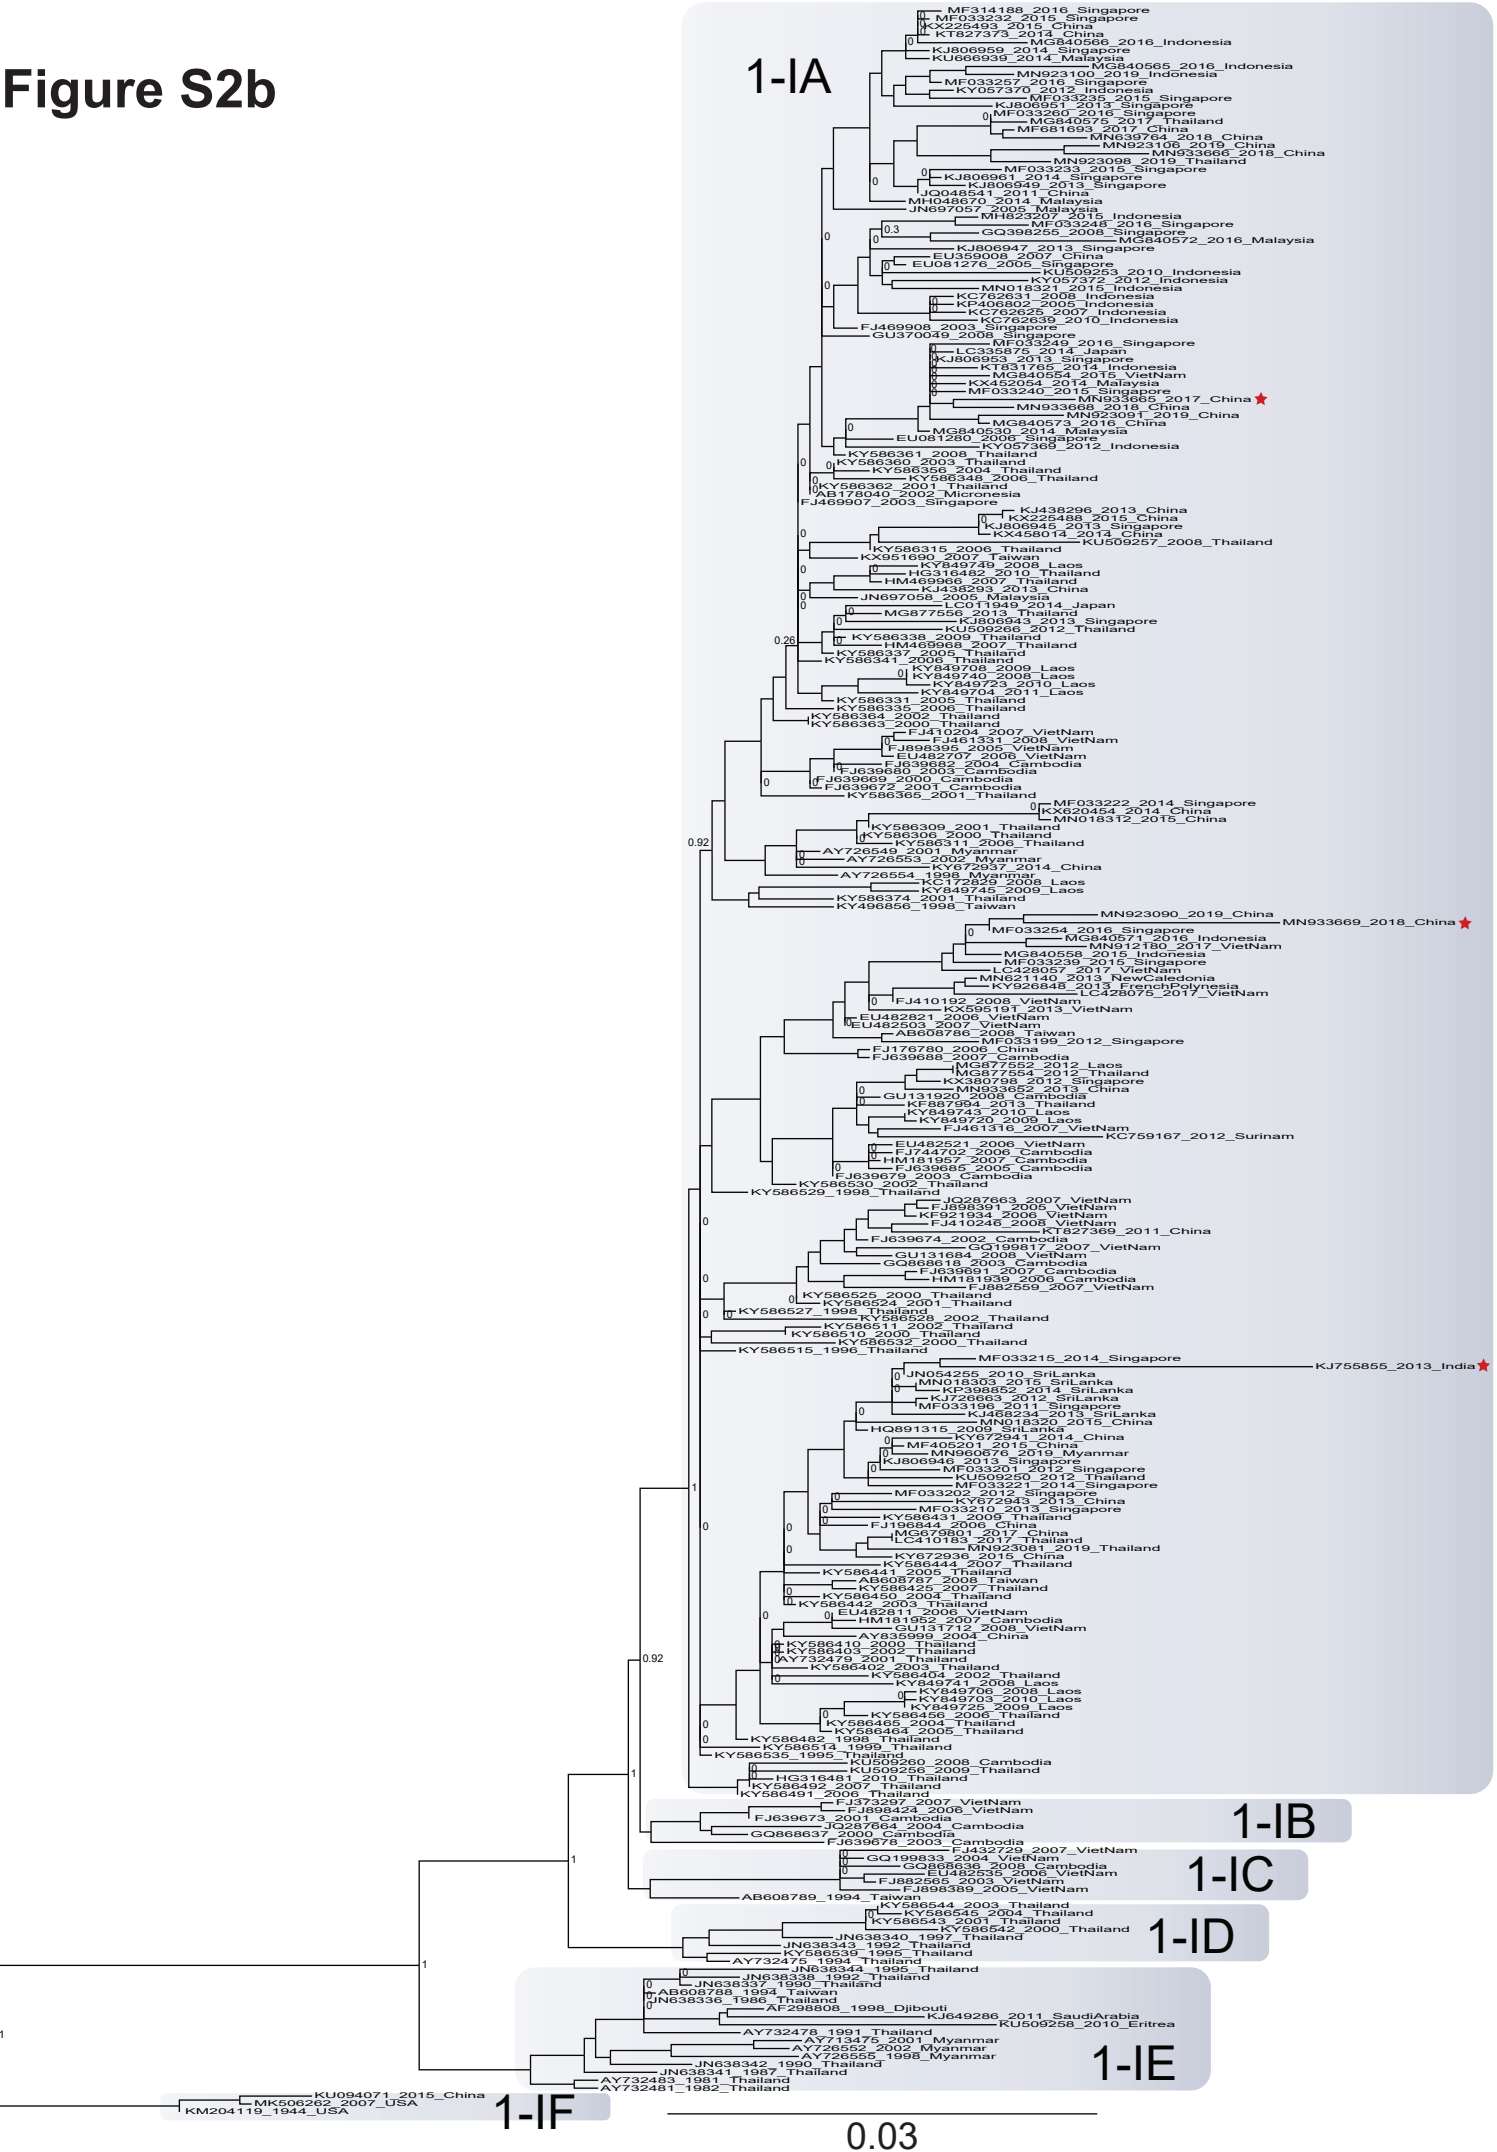



Figure S2c

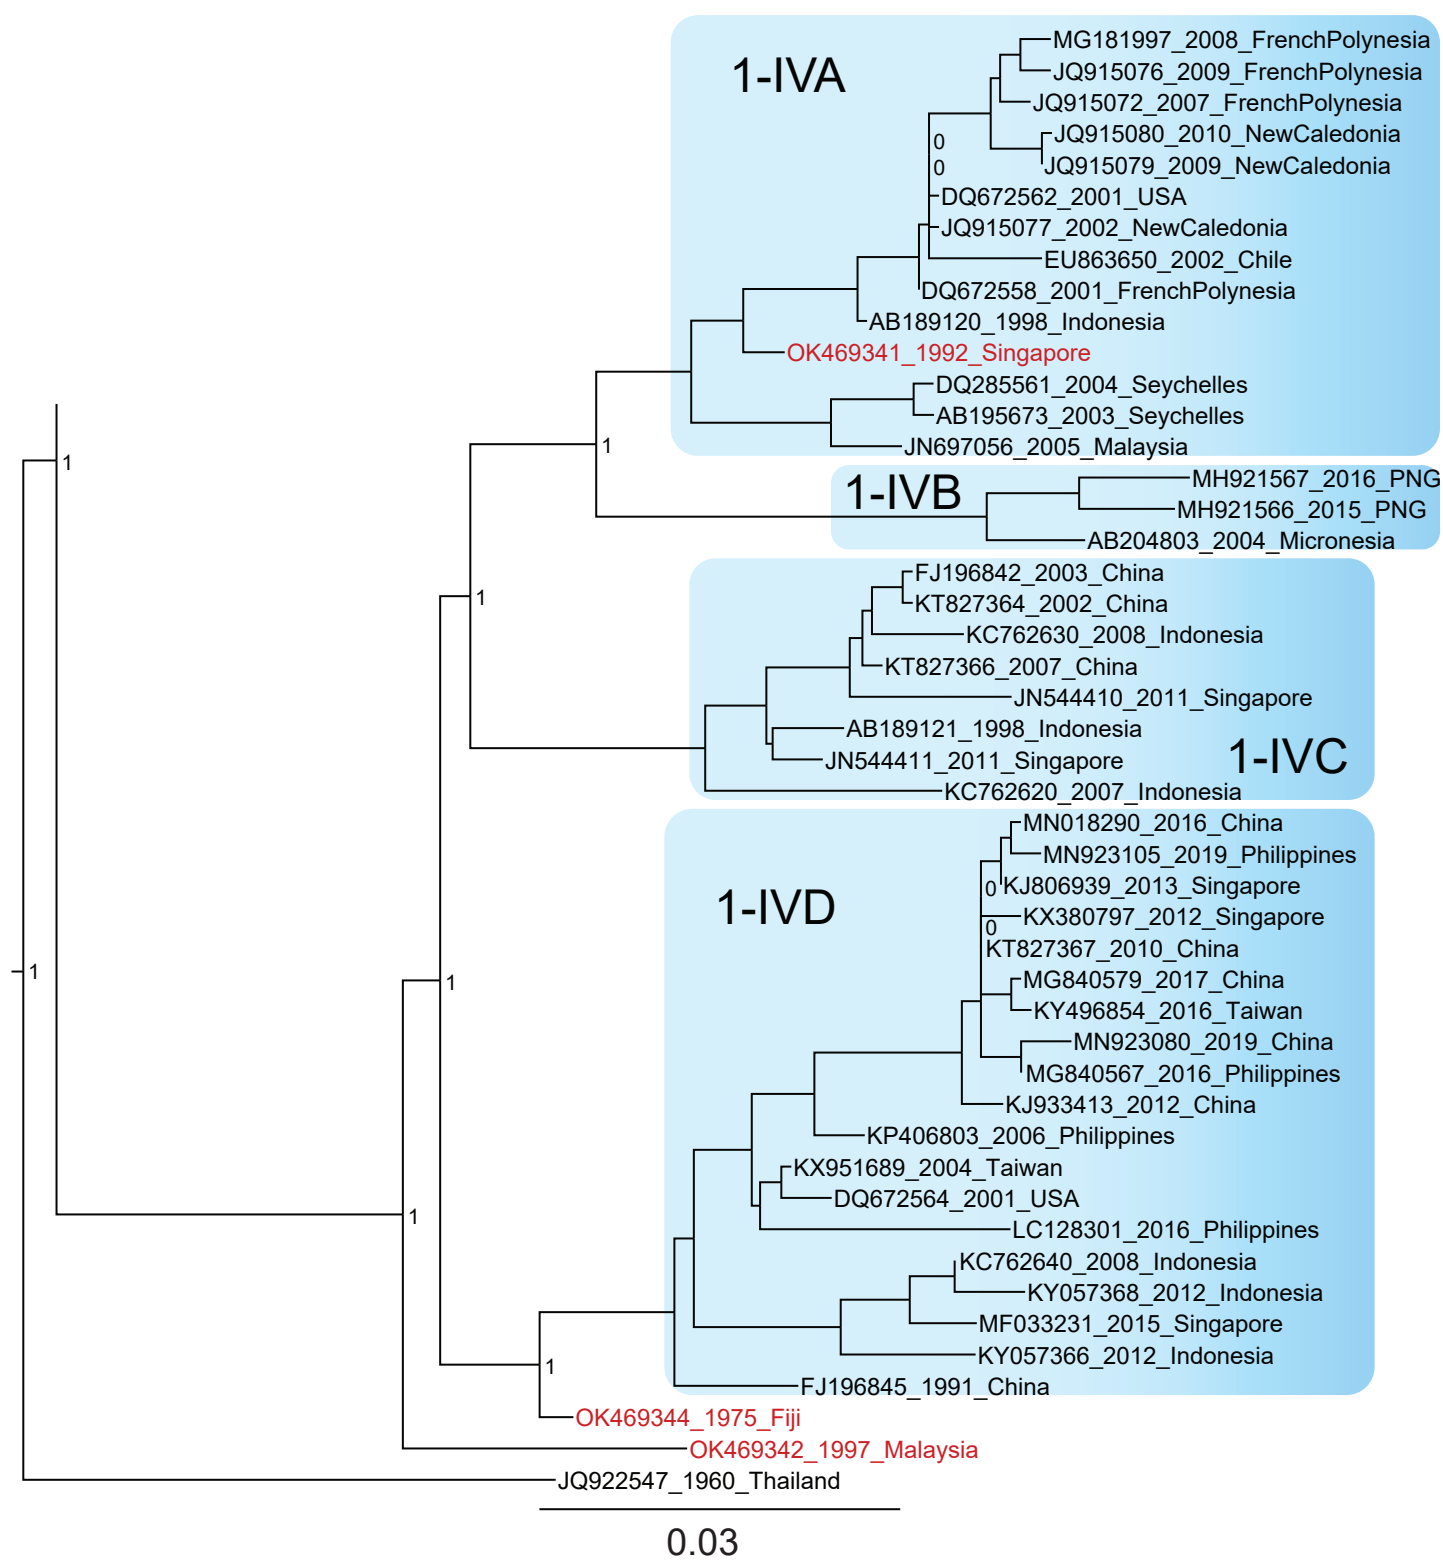

Figure S2d

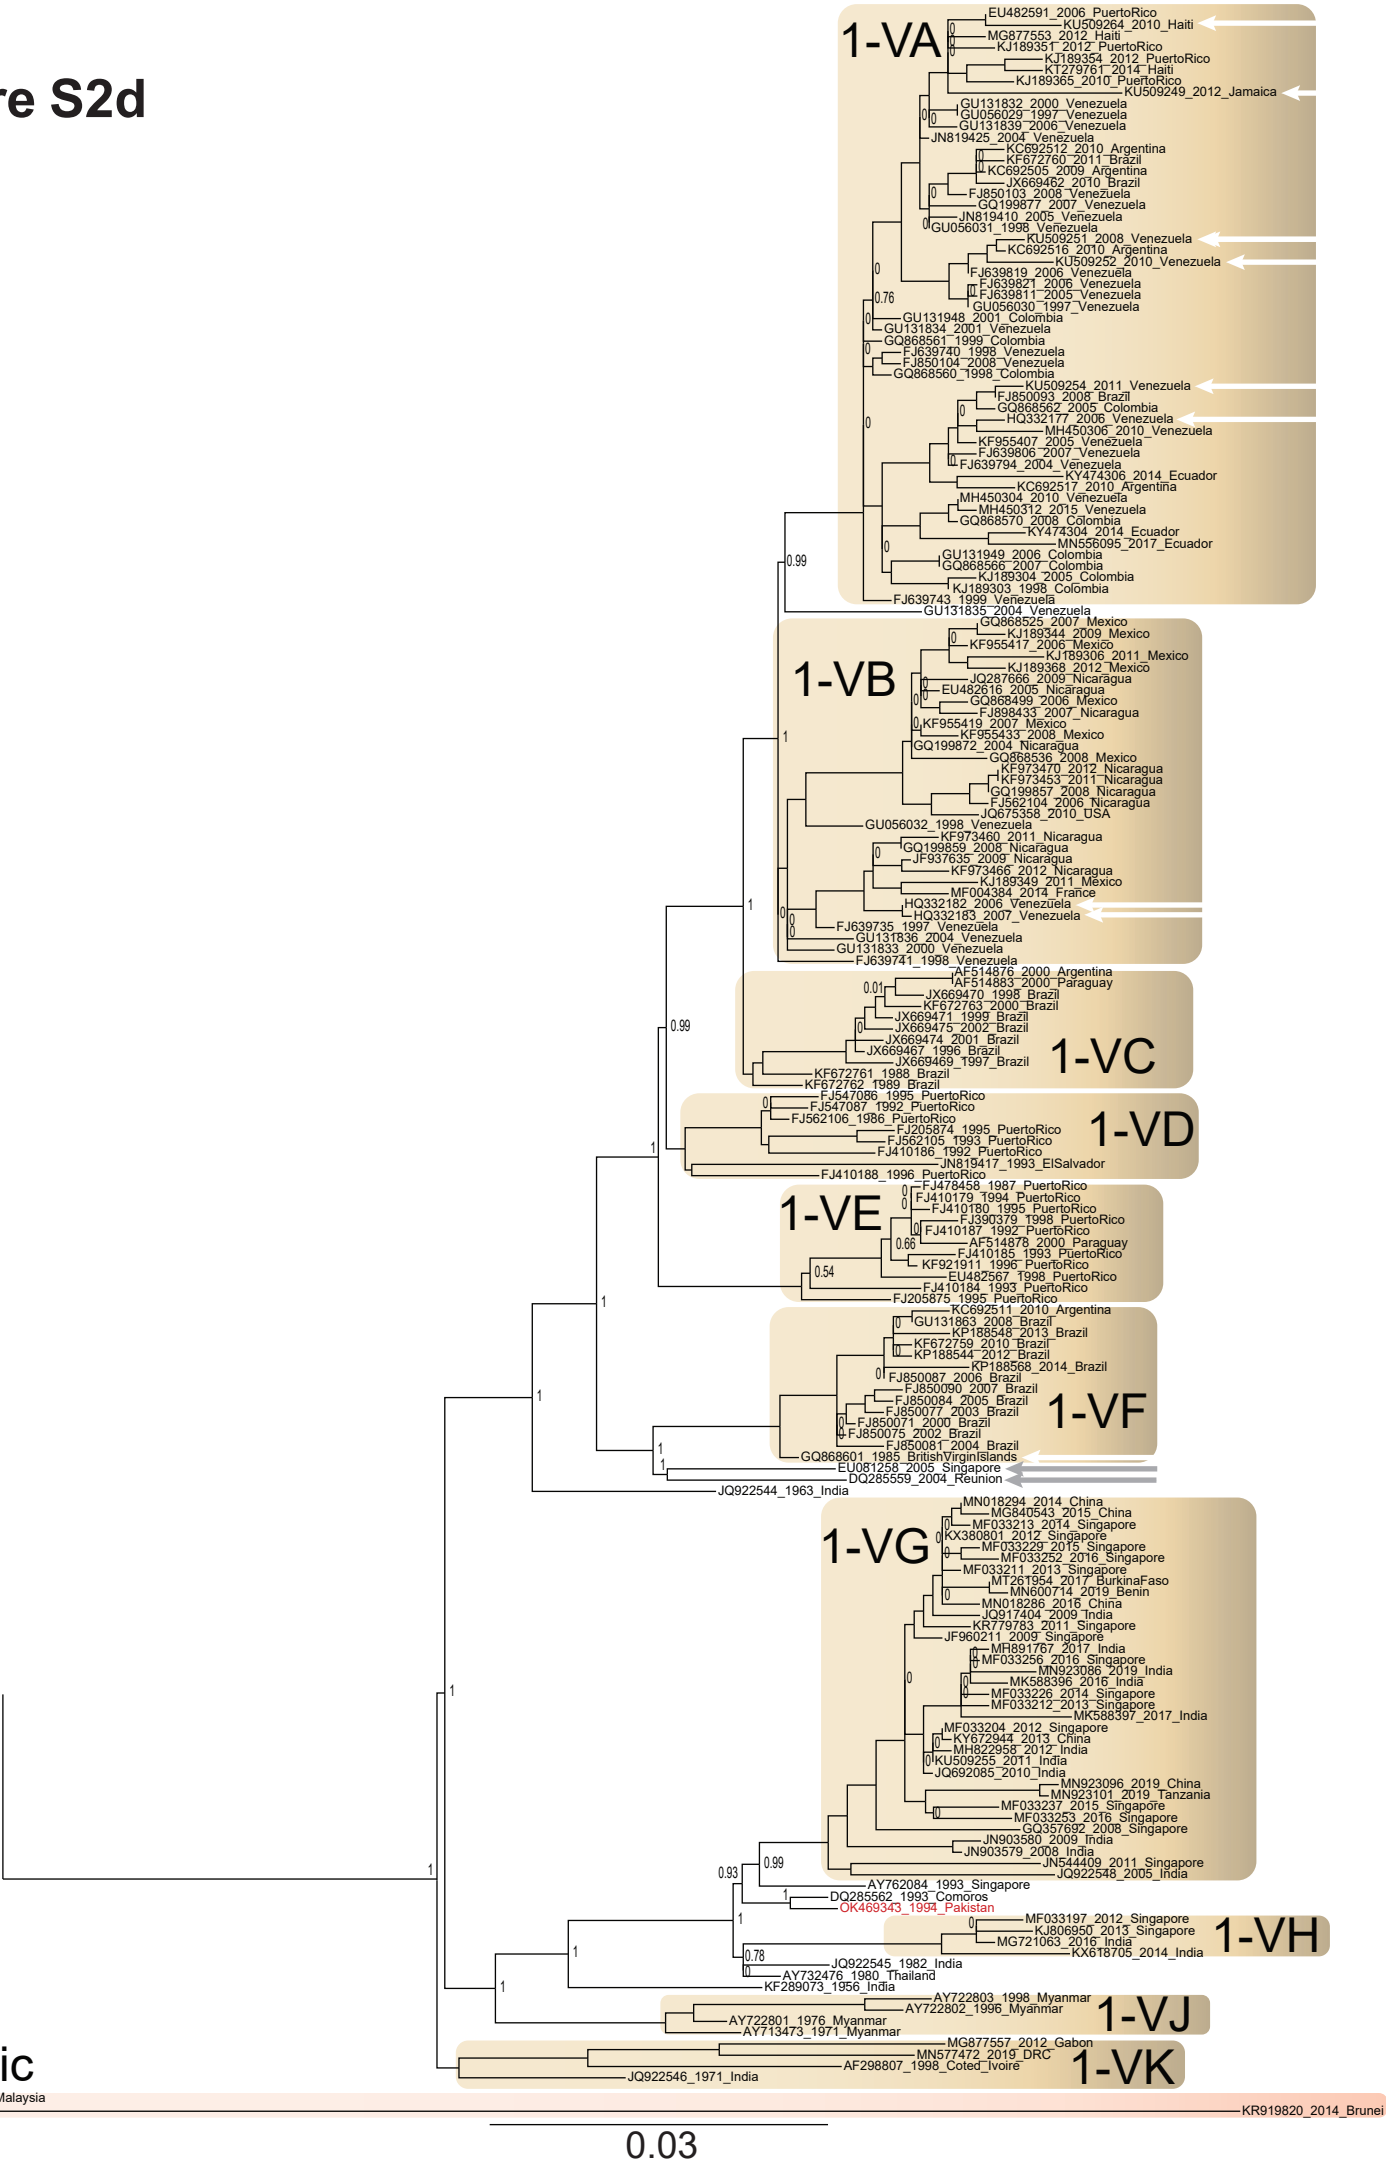

**Supplemental Figure S3: DENV2 Whole Genome ML Trees.** (a) DENV2 Whole Genome ML tree, (b) Asian American genotype, (c) Asian I and Asian II genotypes, (d) Cosmopolitan genotype, (e) American and sylvatic genotypes. aLRT SH-like branch support indicated for the major branches. Support values  $>0.8$  have been eliminated in most instances for clarity. Red circles/font indicate newly sequenced isolates from the QUT Arbovirus collection. Branches under positive selection (see section 3.2.2) are indicated by a red star.

Figure S3a

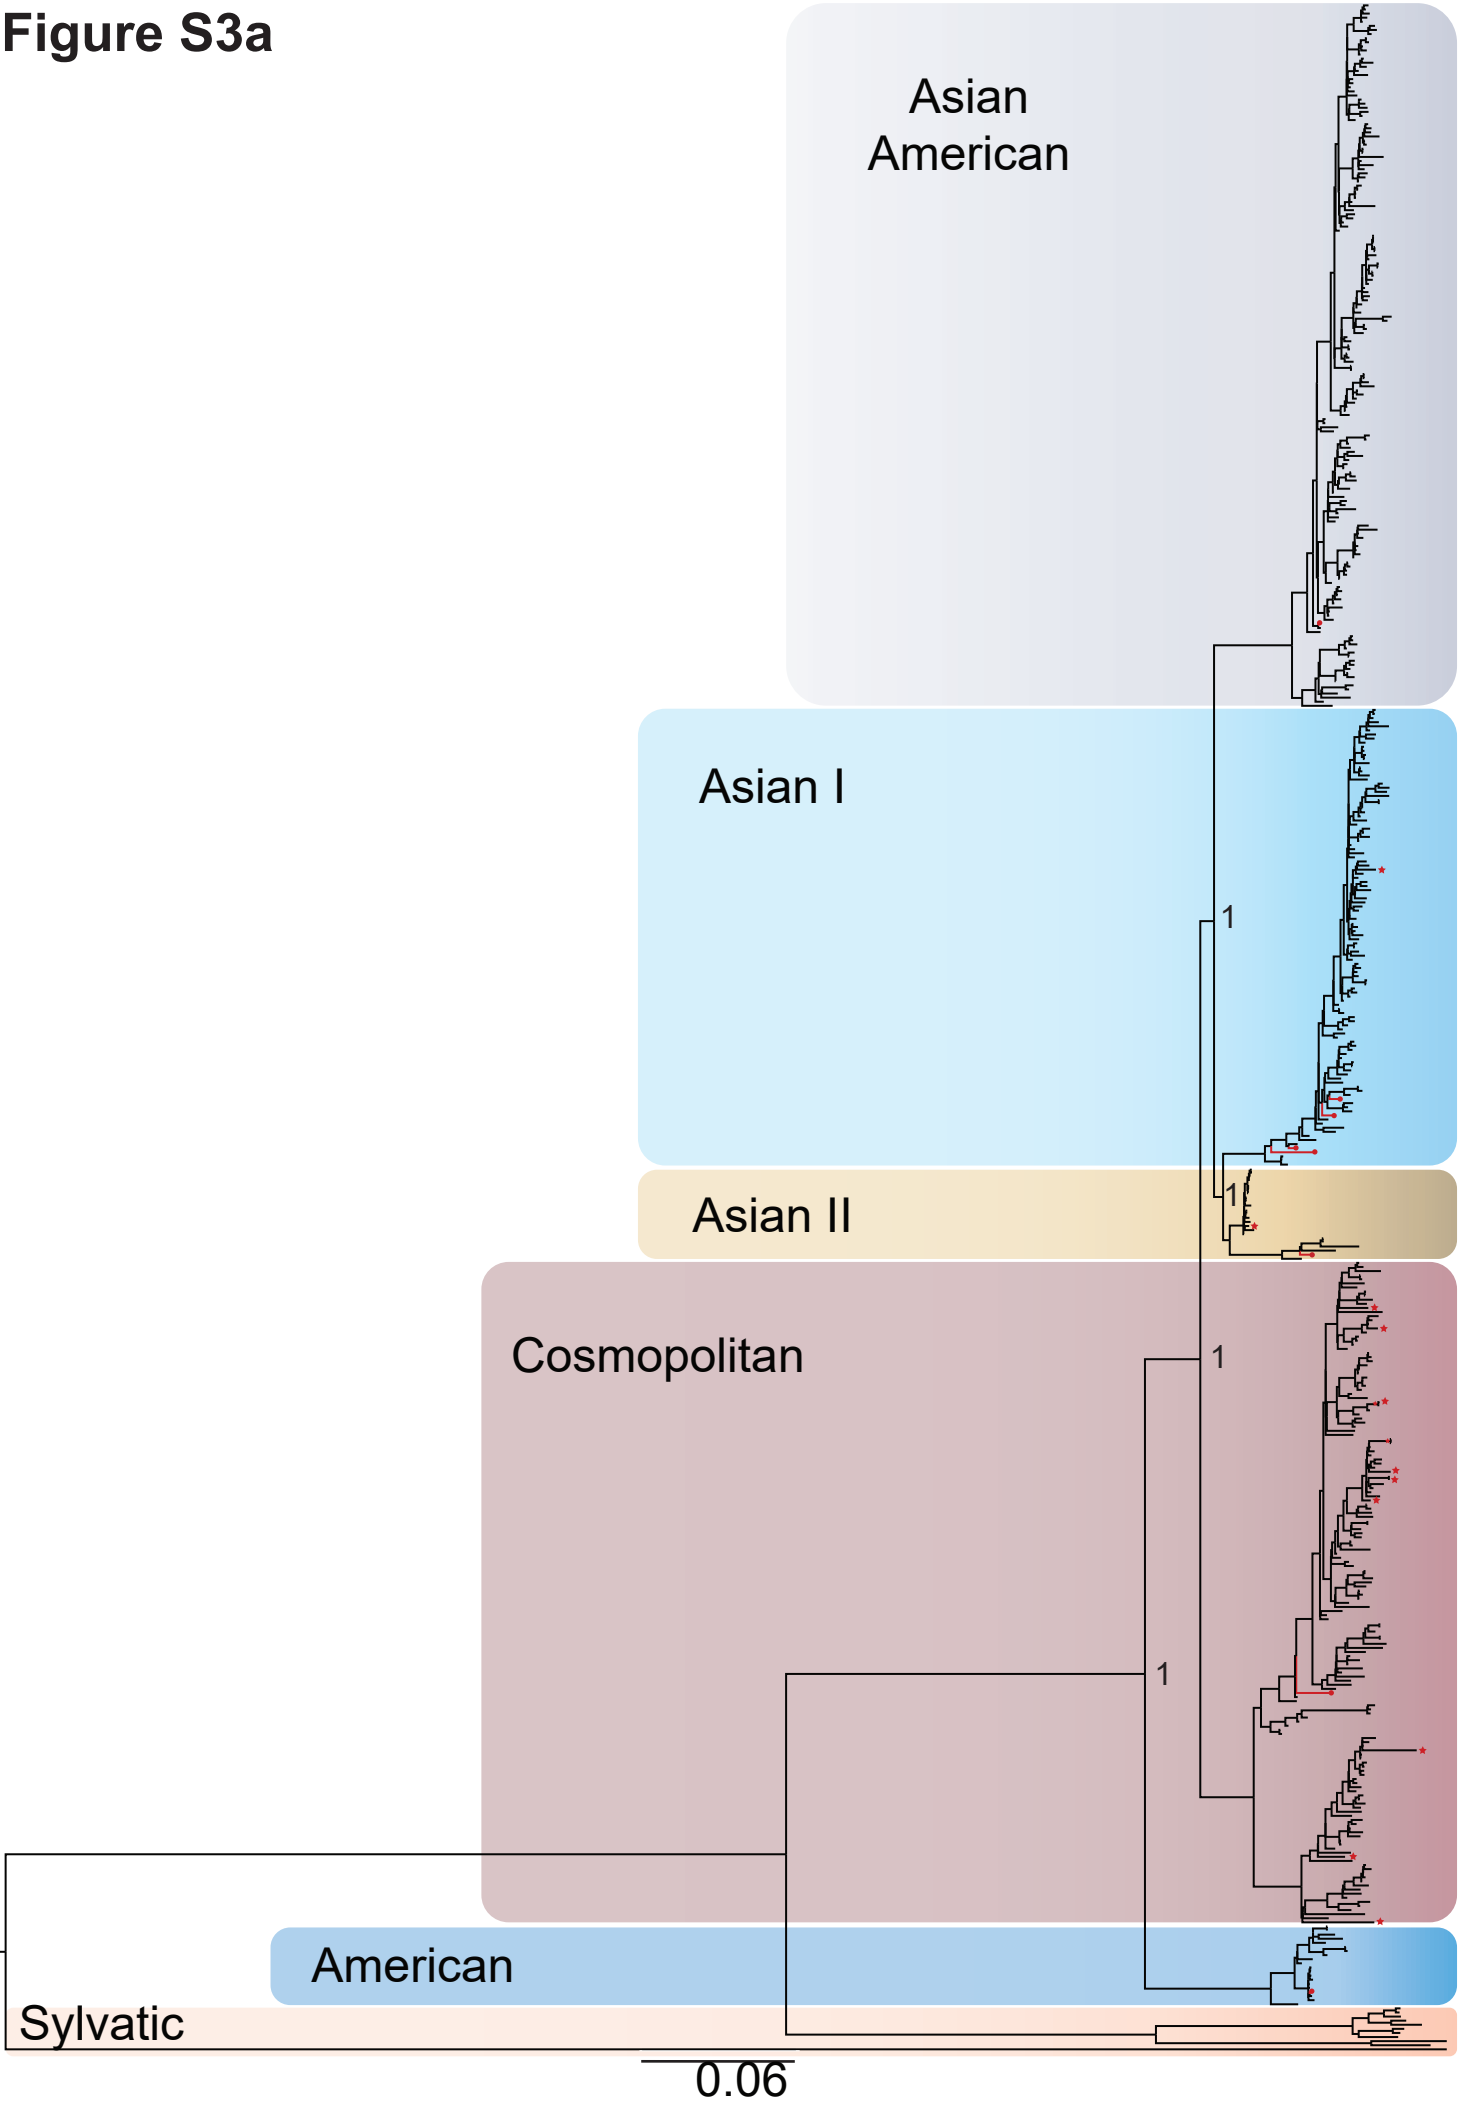

Figure S3b

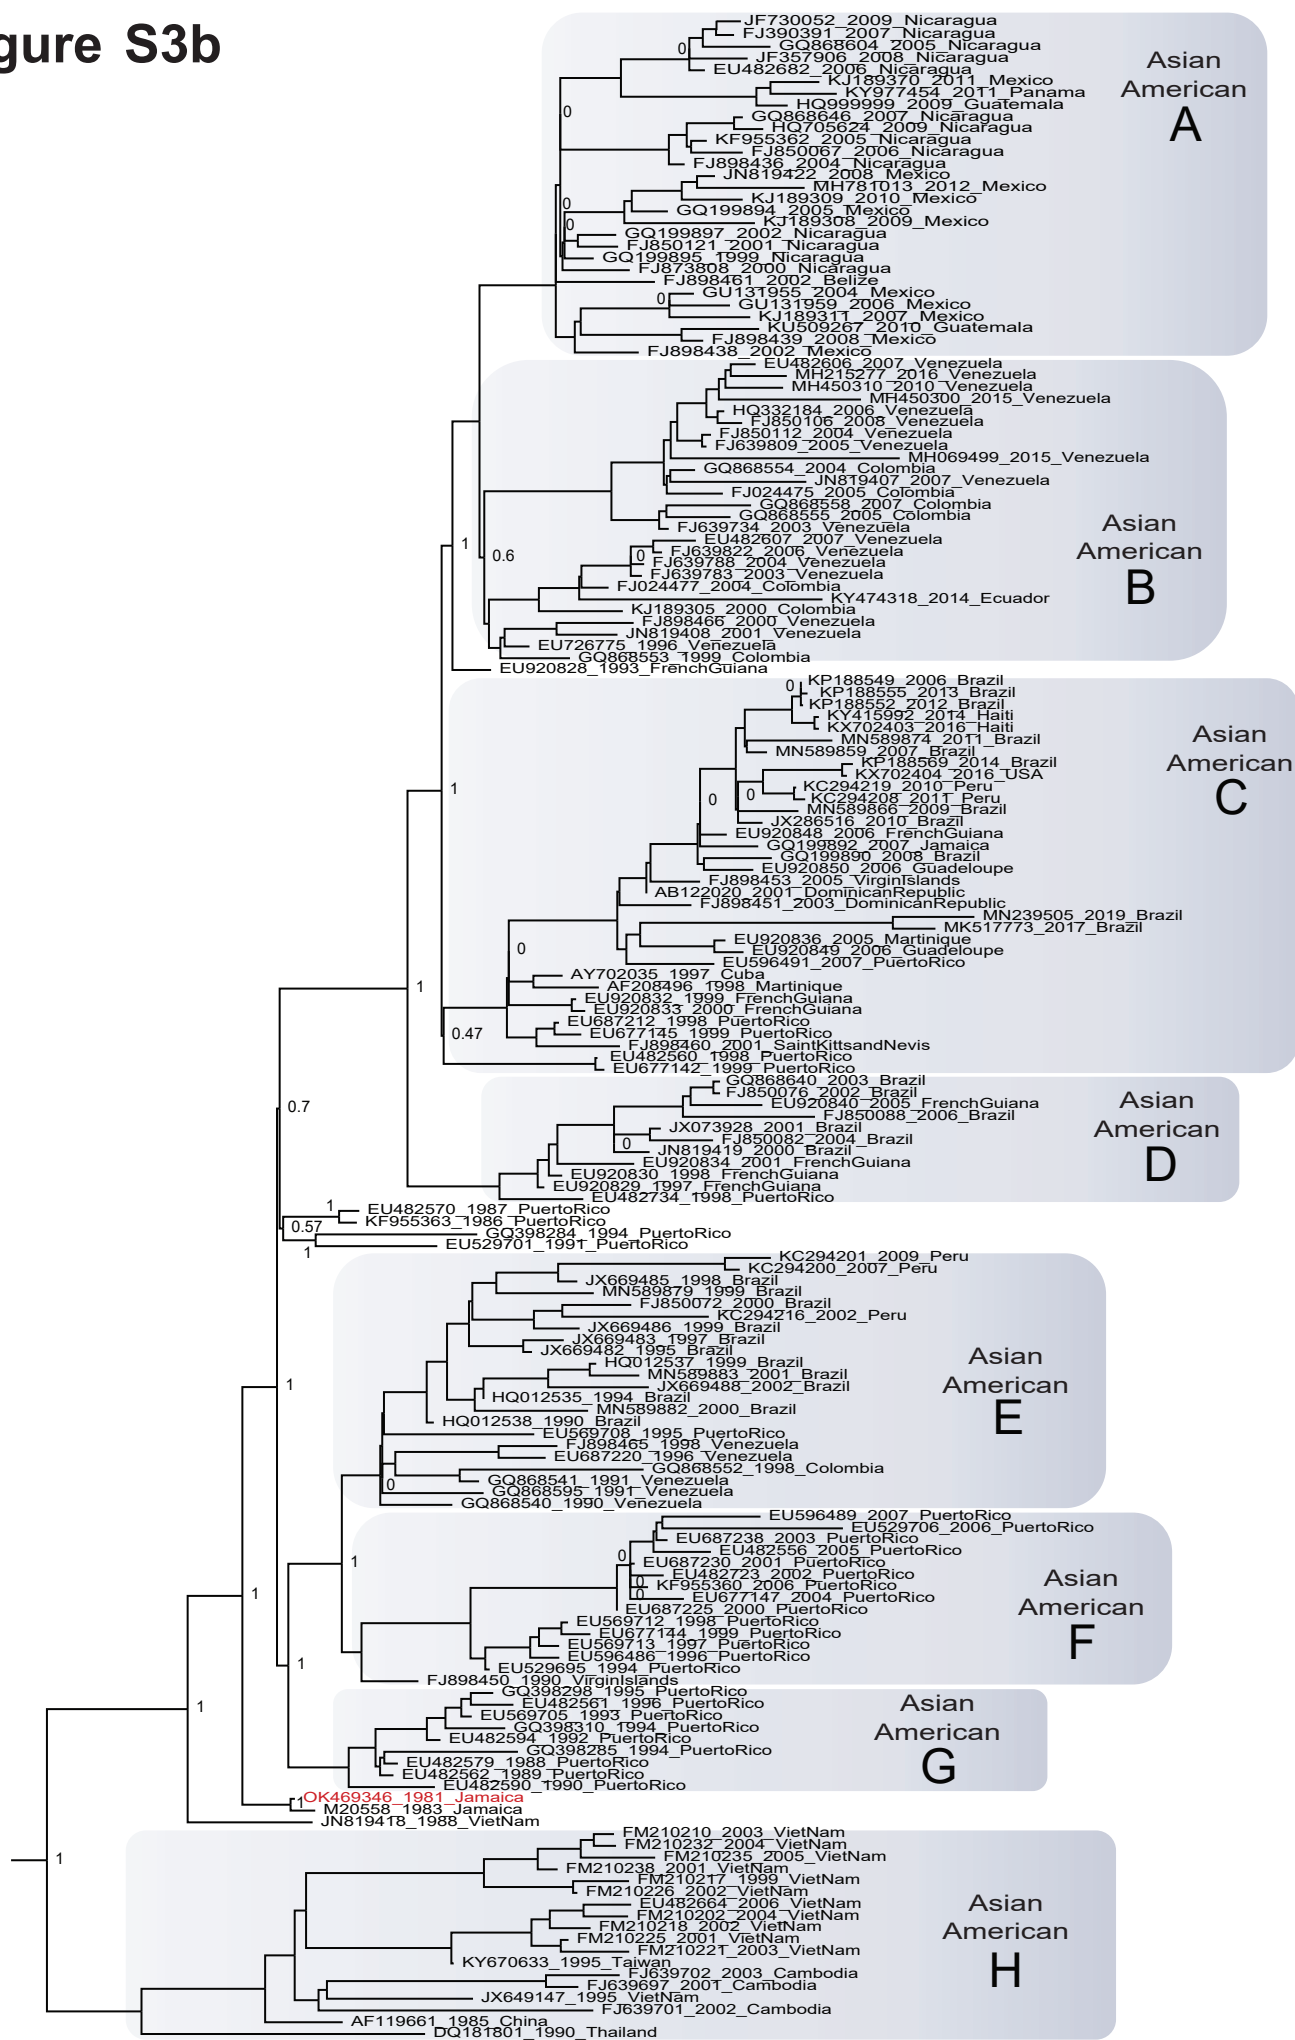

Figure S3c

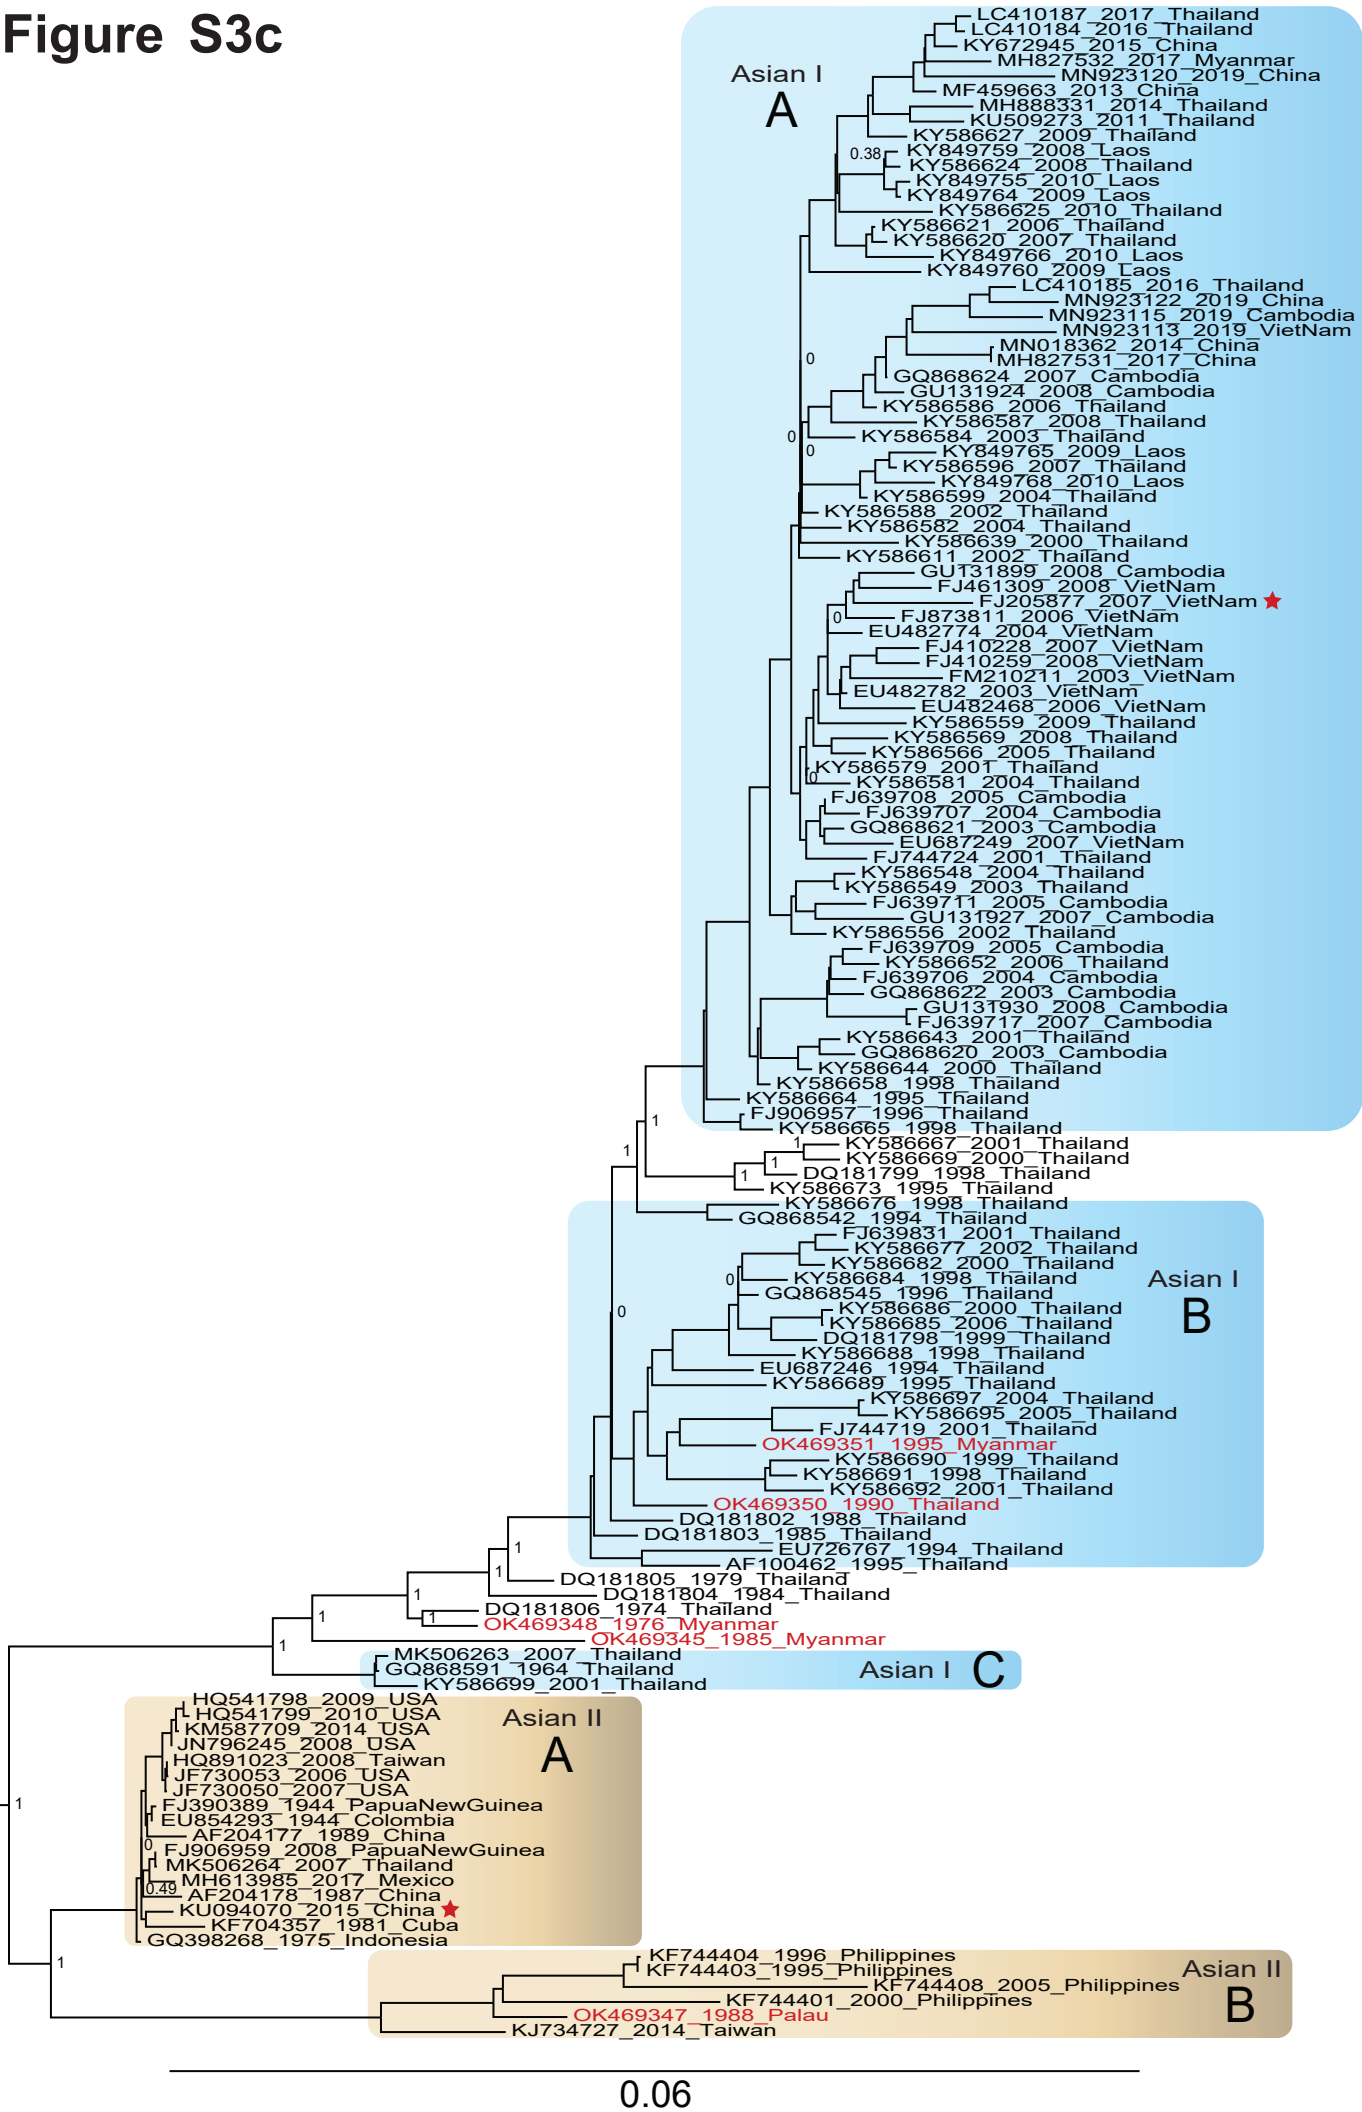

Figure S3d

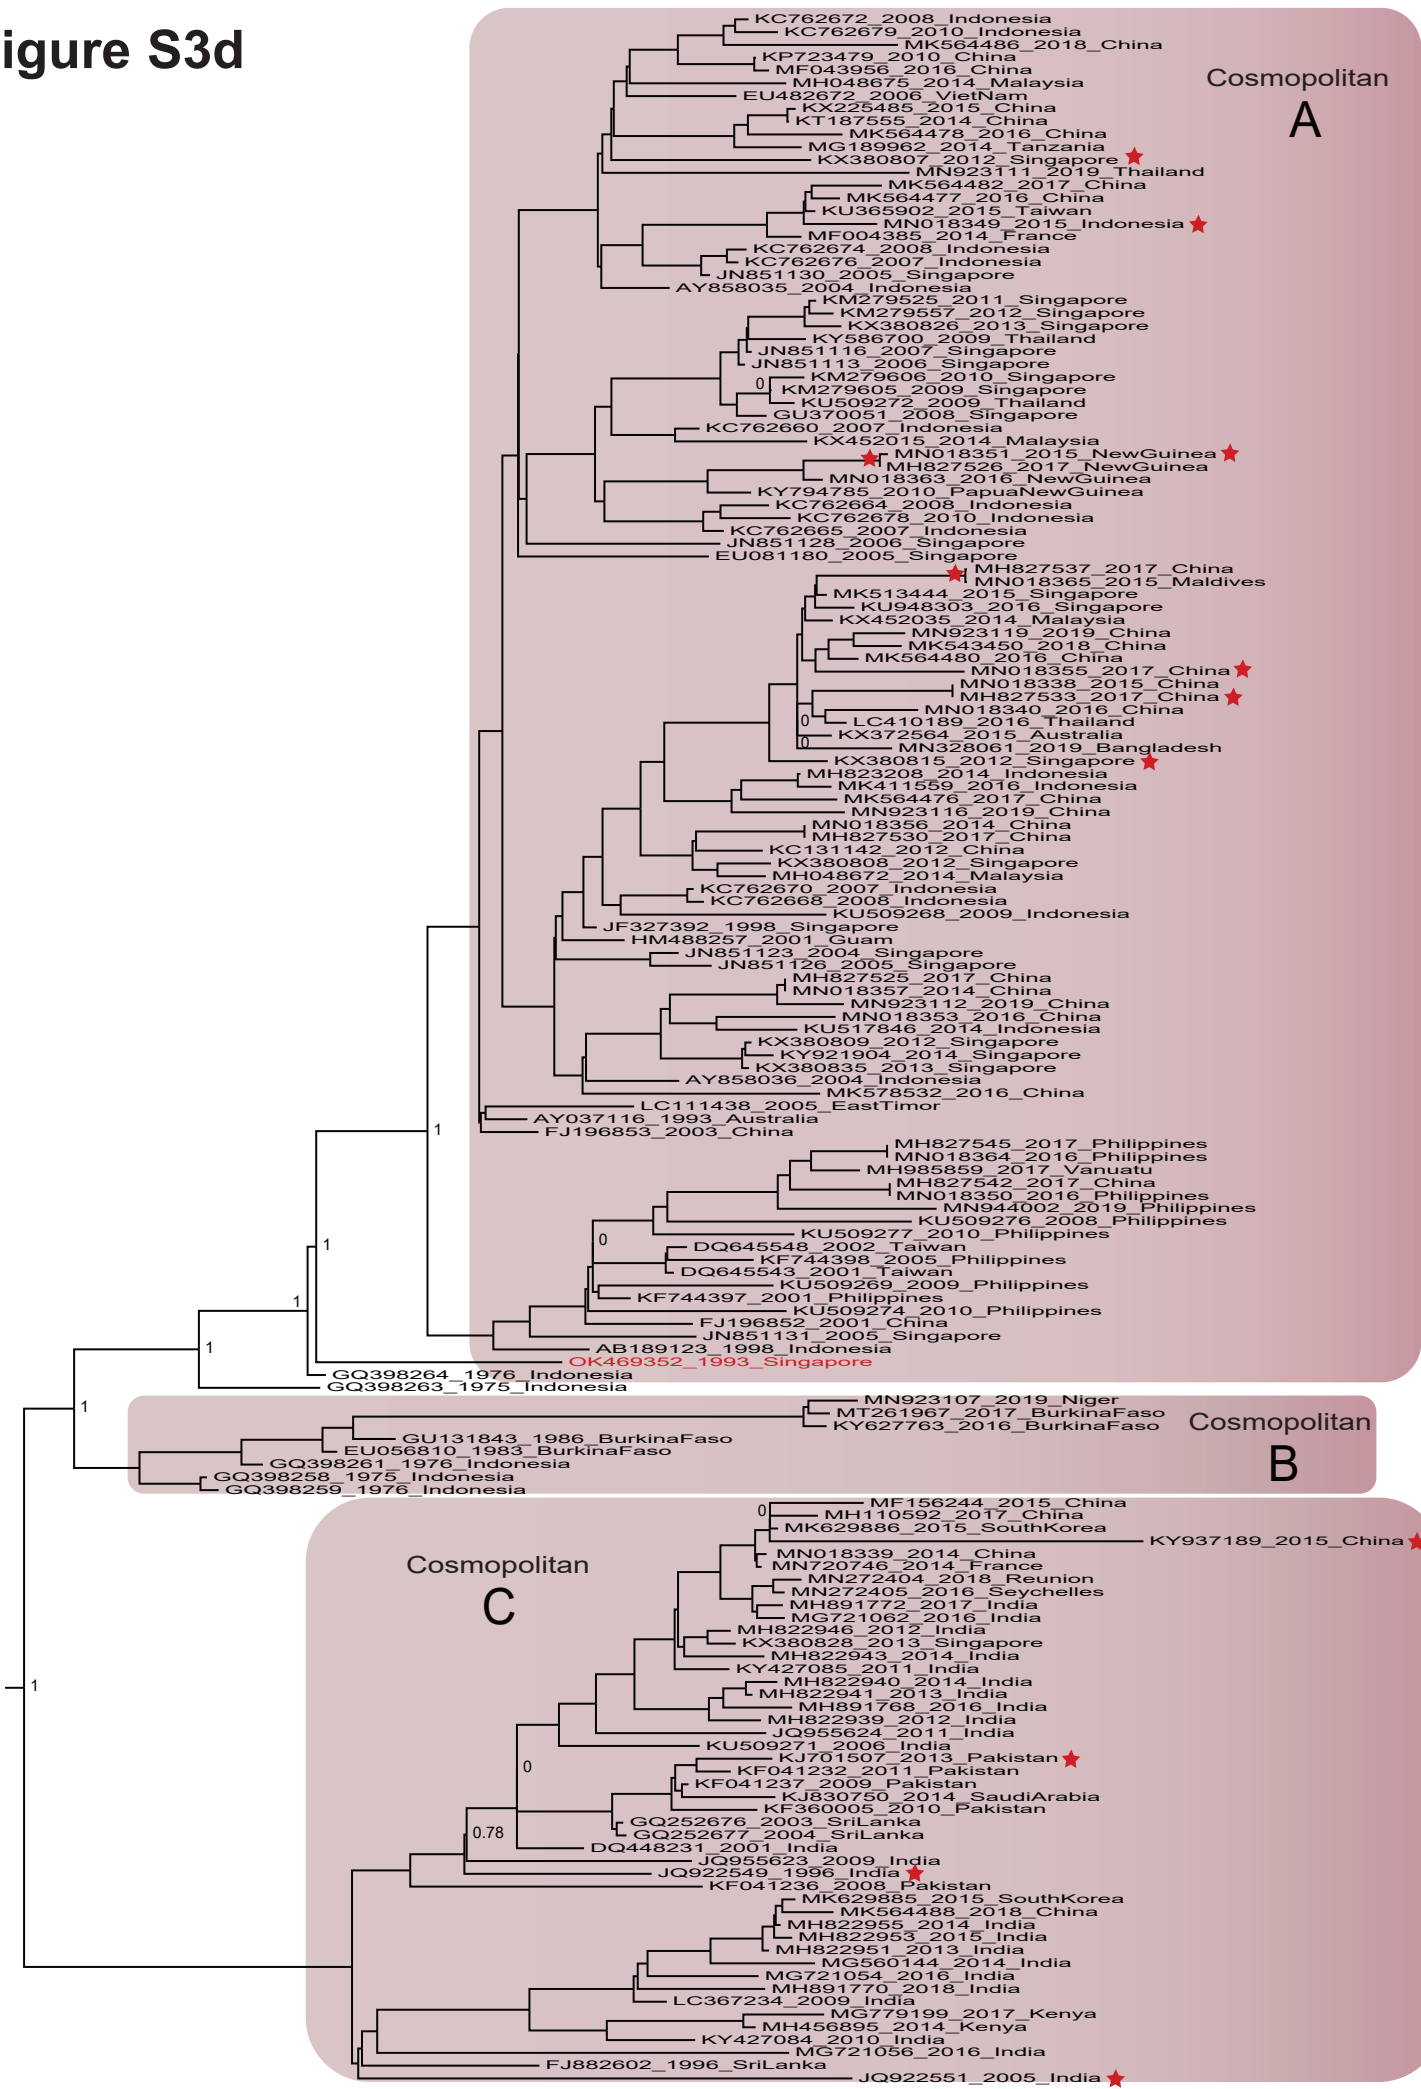



Figure S3e

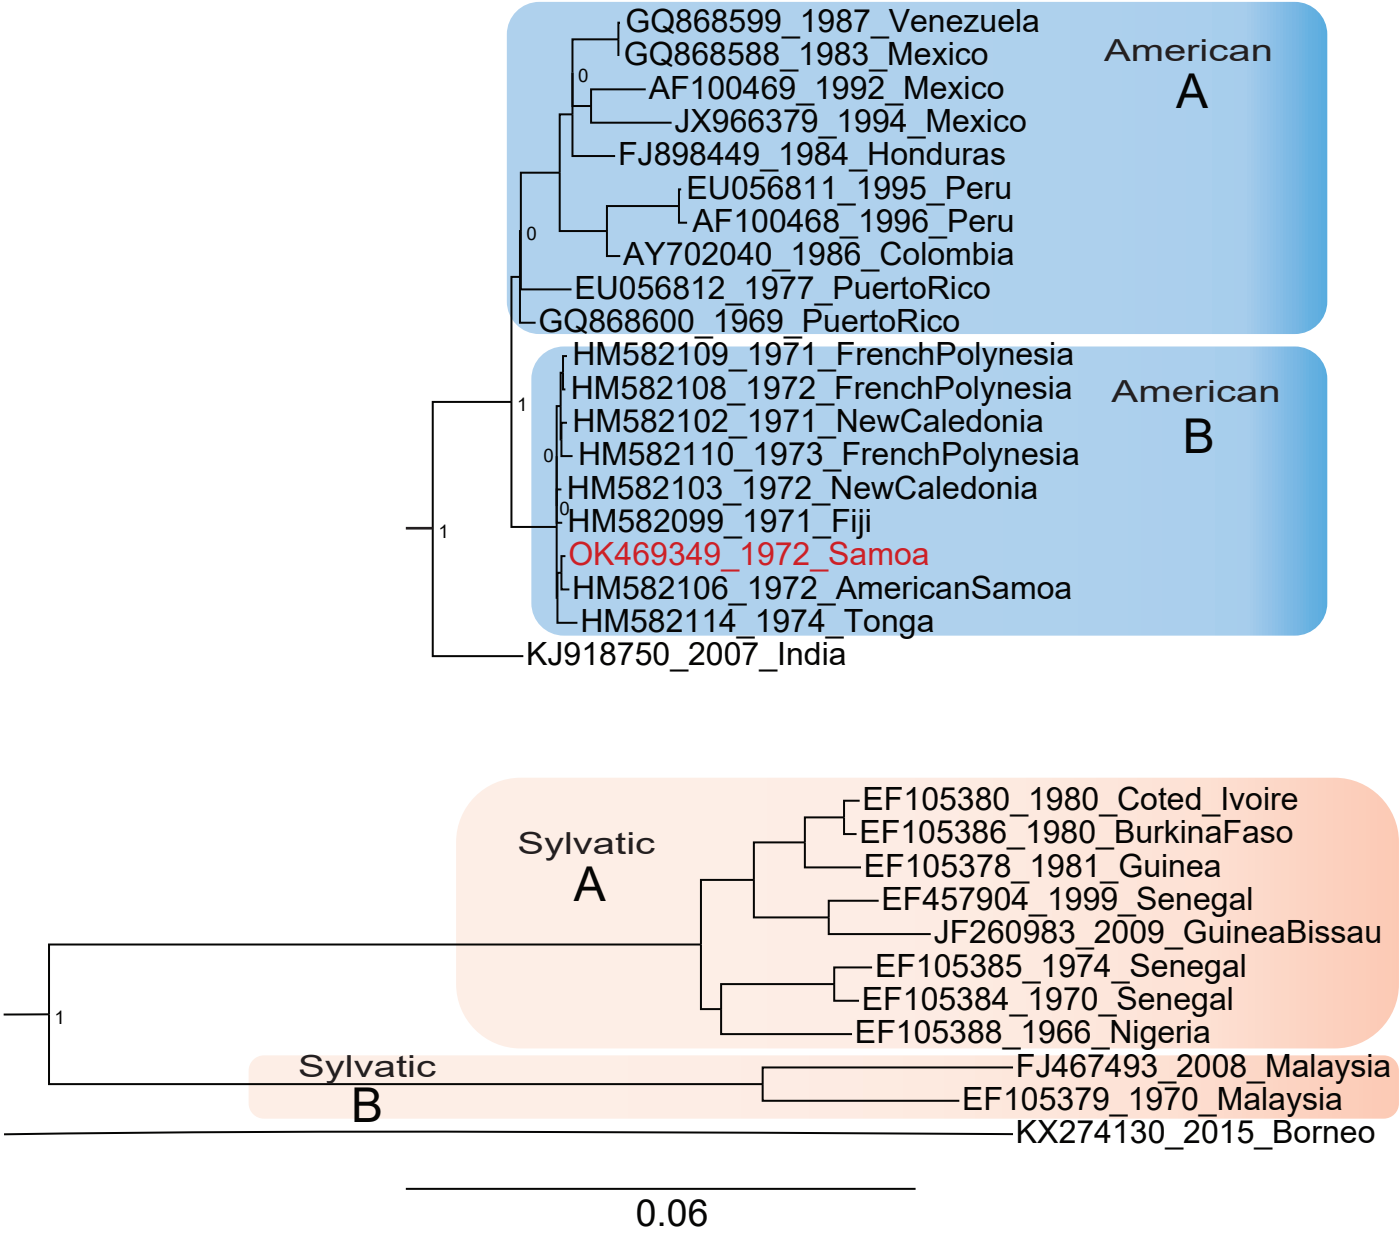



**Supplemental Figure S4: DENV2 E Gene ML Trees.** (a) DENV2 E gene ML tree, (b) Cosmopolitan genotype, (c) American and sylvatic genotypes, (d) Asian I and Asian II genotypes, (e) Asian American genotype. aLRT SH-like branch support indicated for the major branches. Support values >0.8 have been eliminated in most instances for clarity. Red circles/font indicate newly sequenced isolates from the QUT Arbovirus collection. Branches under positive selection (see section 3.2.2) are indicated by a red star.

Figure S4a

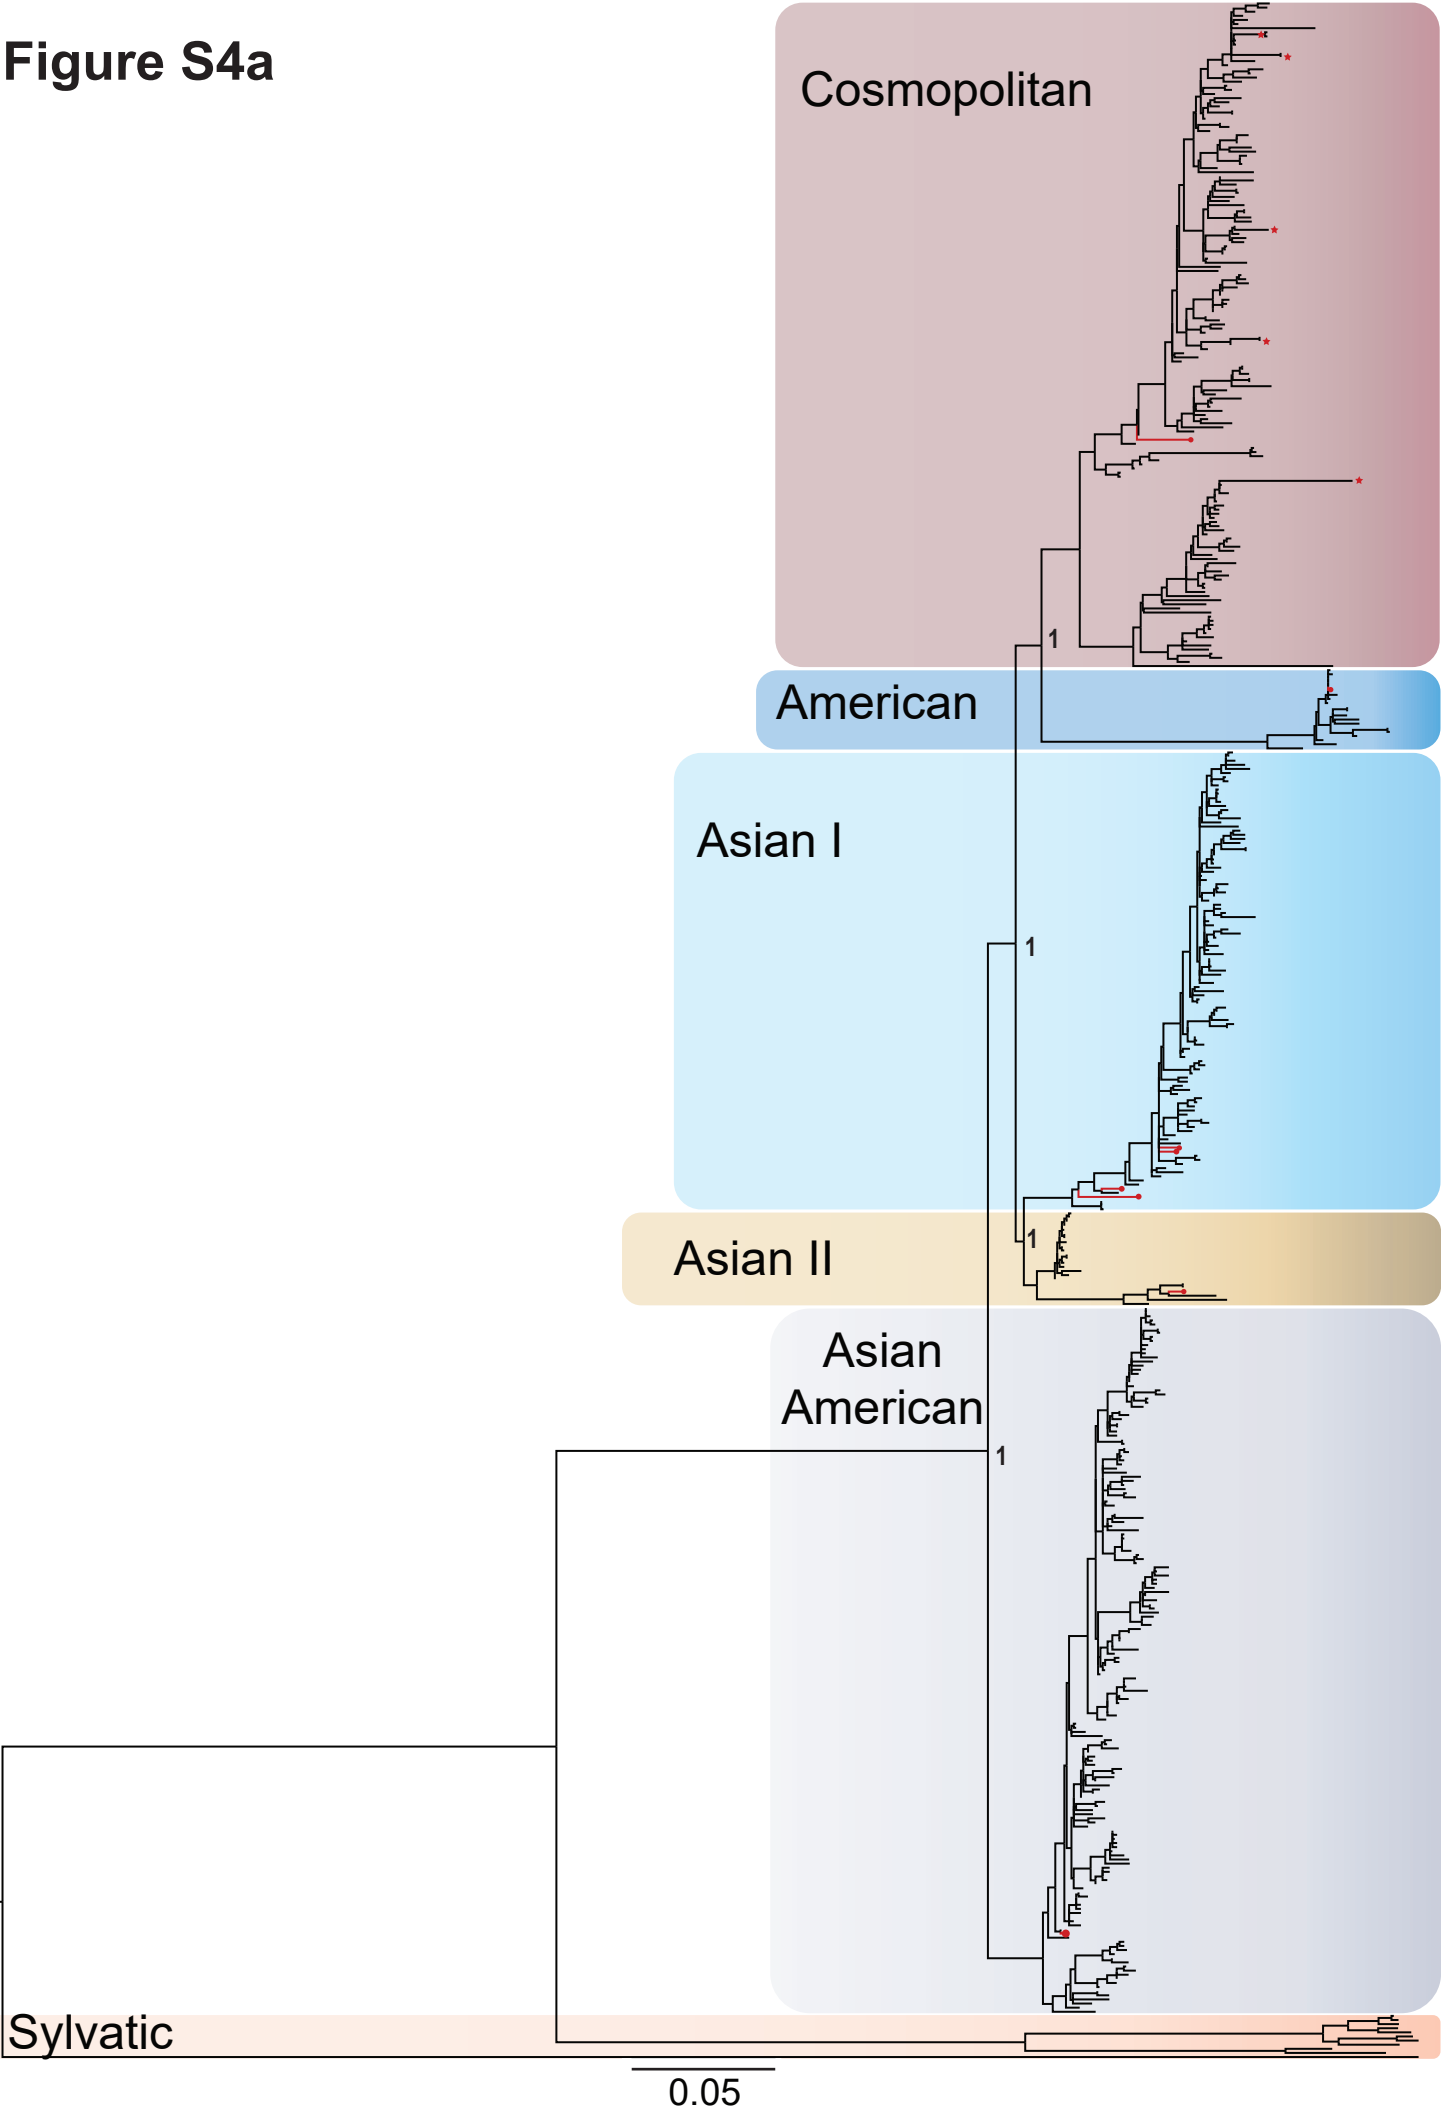

Figure S4b

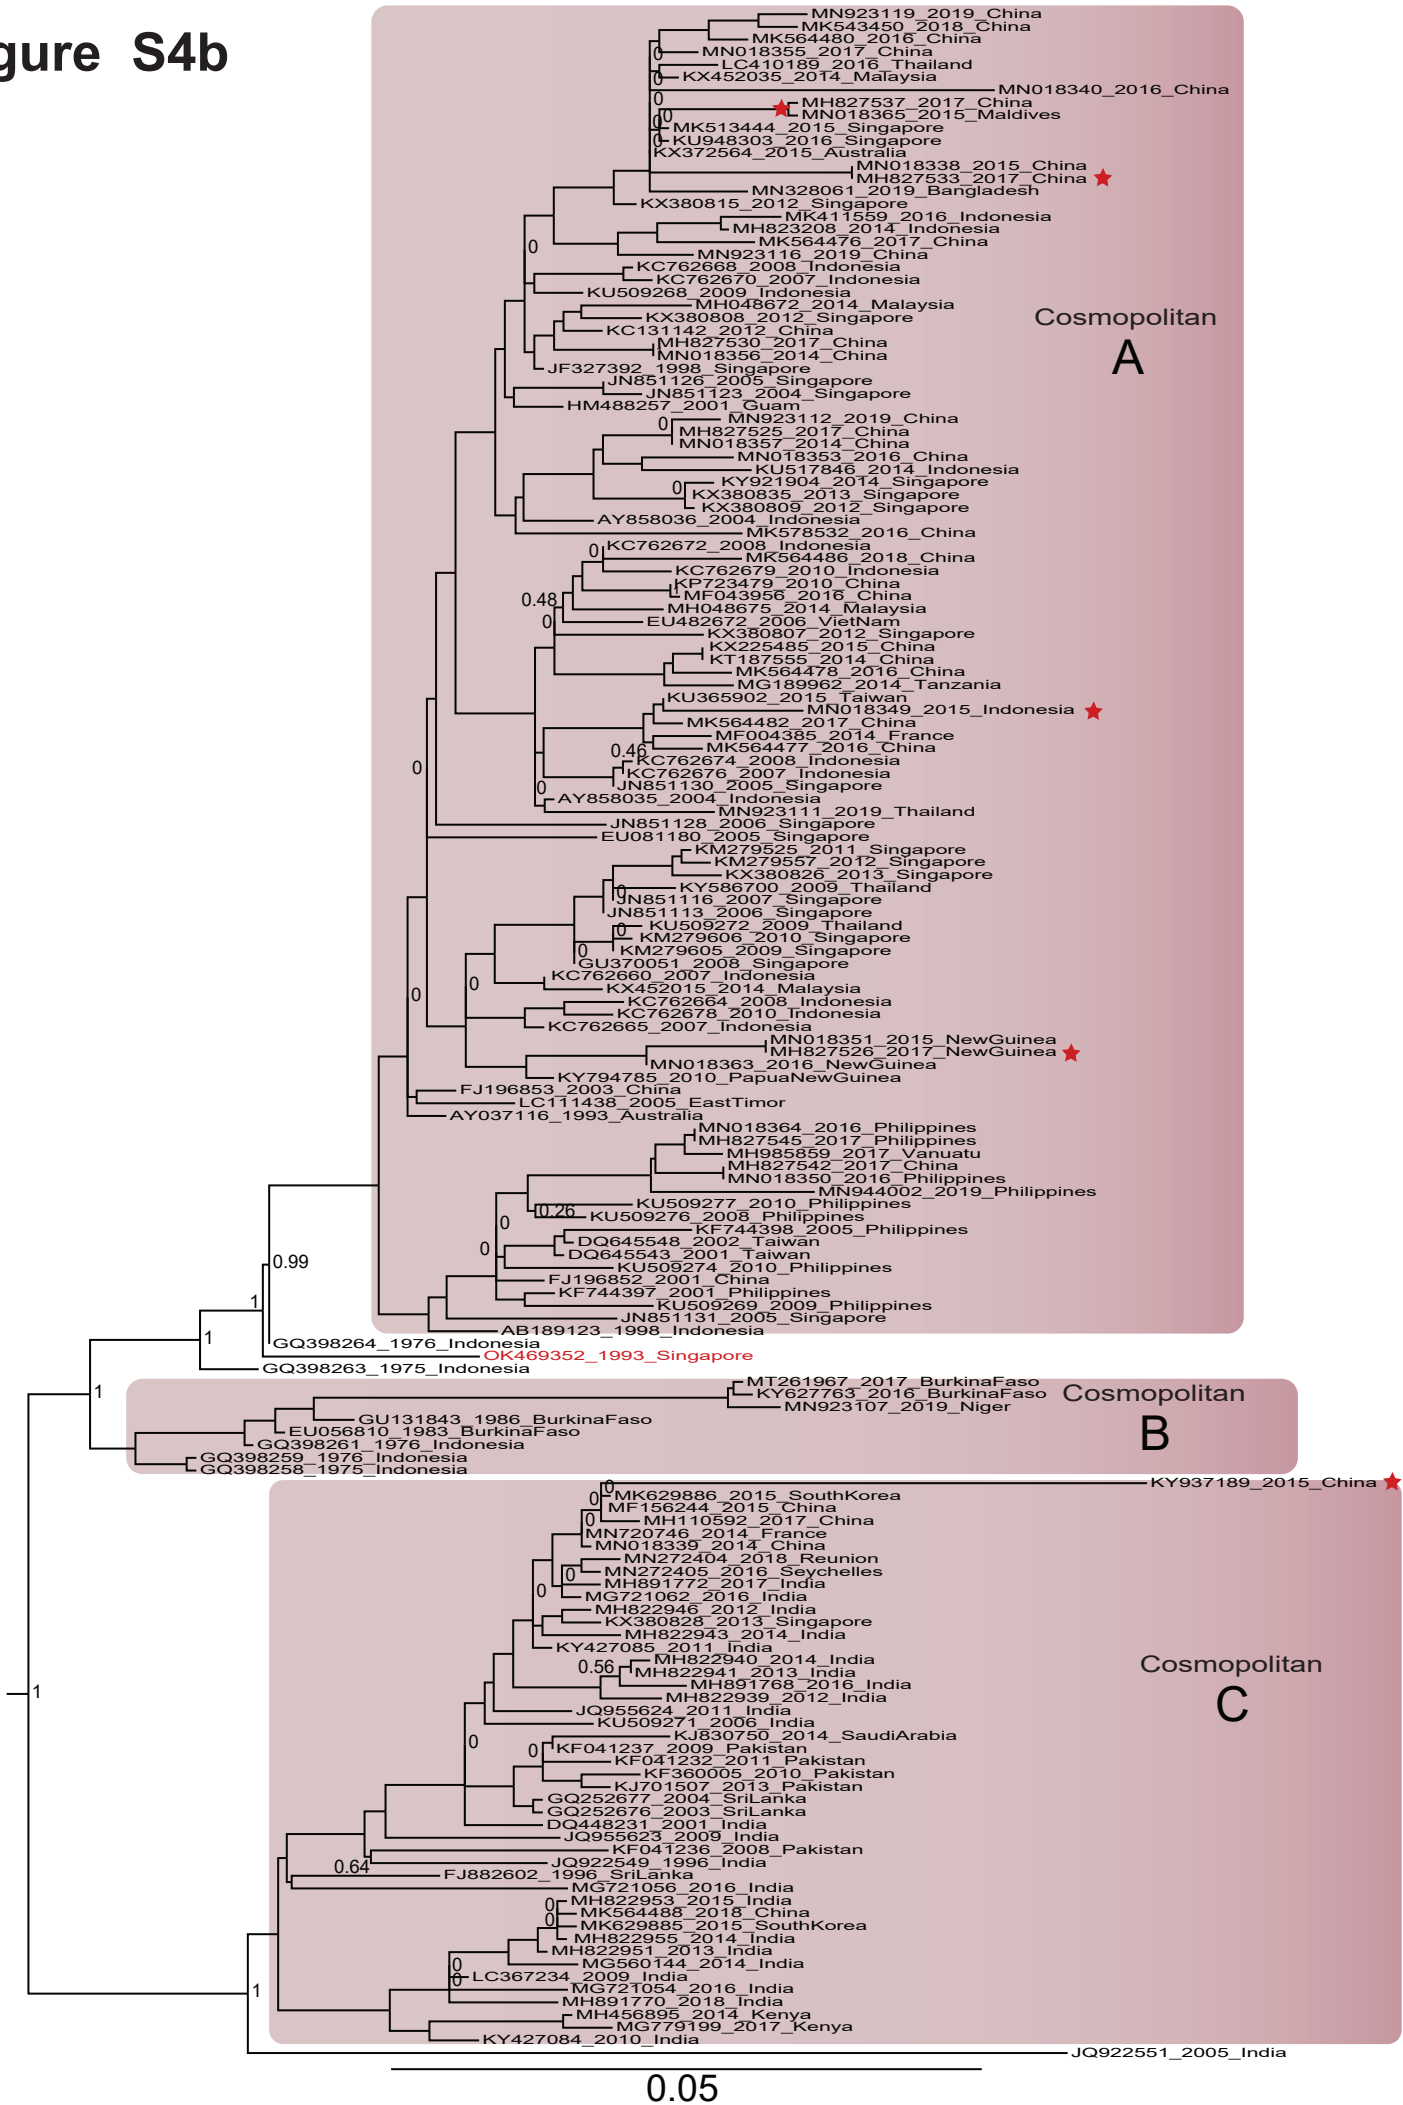

Figure S4c

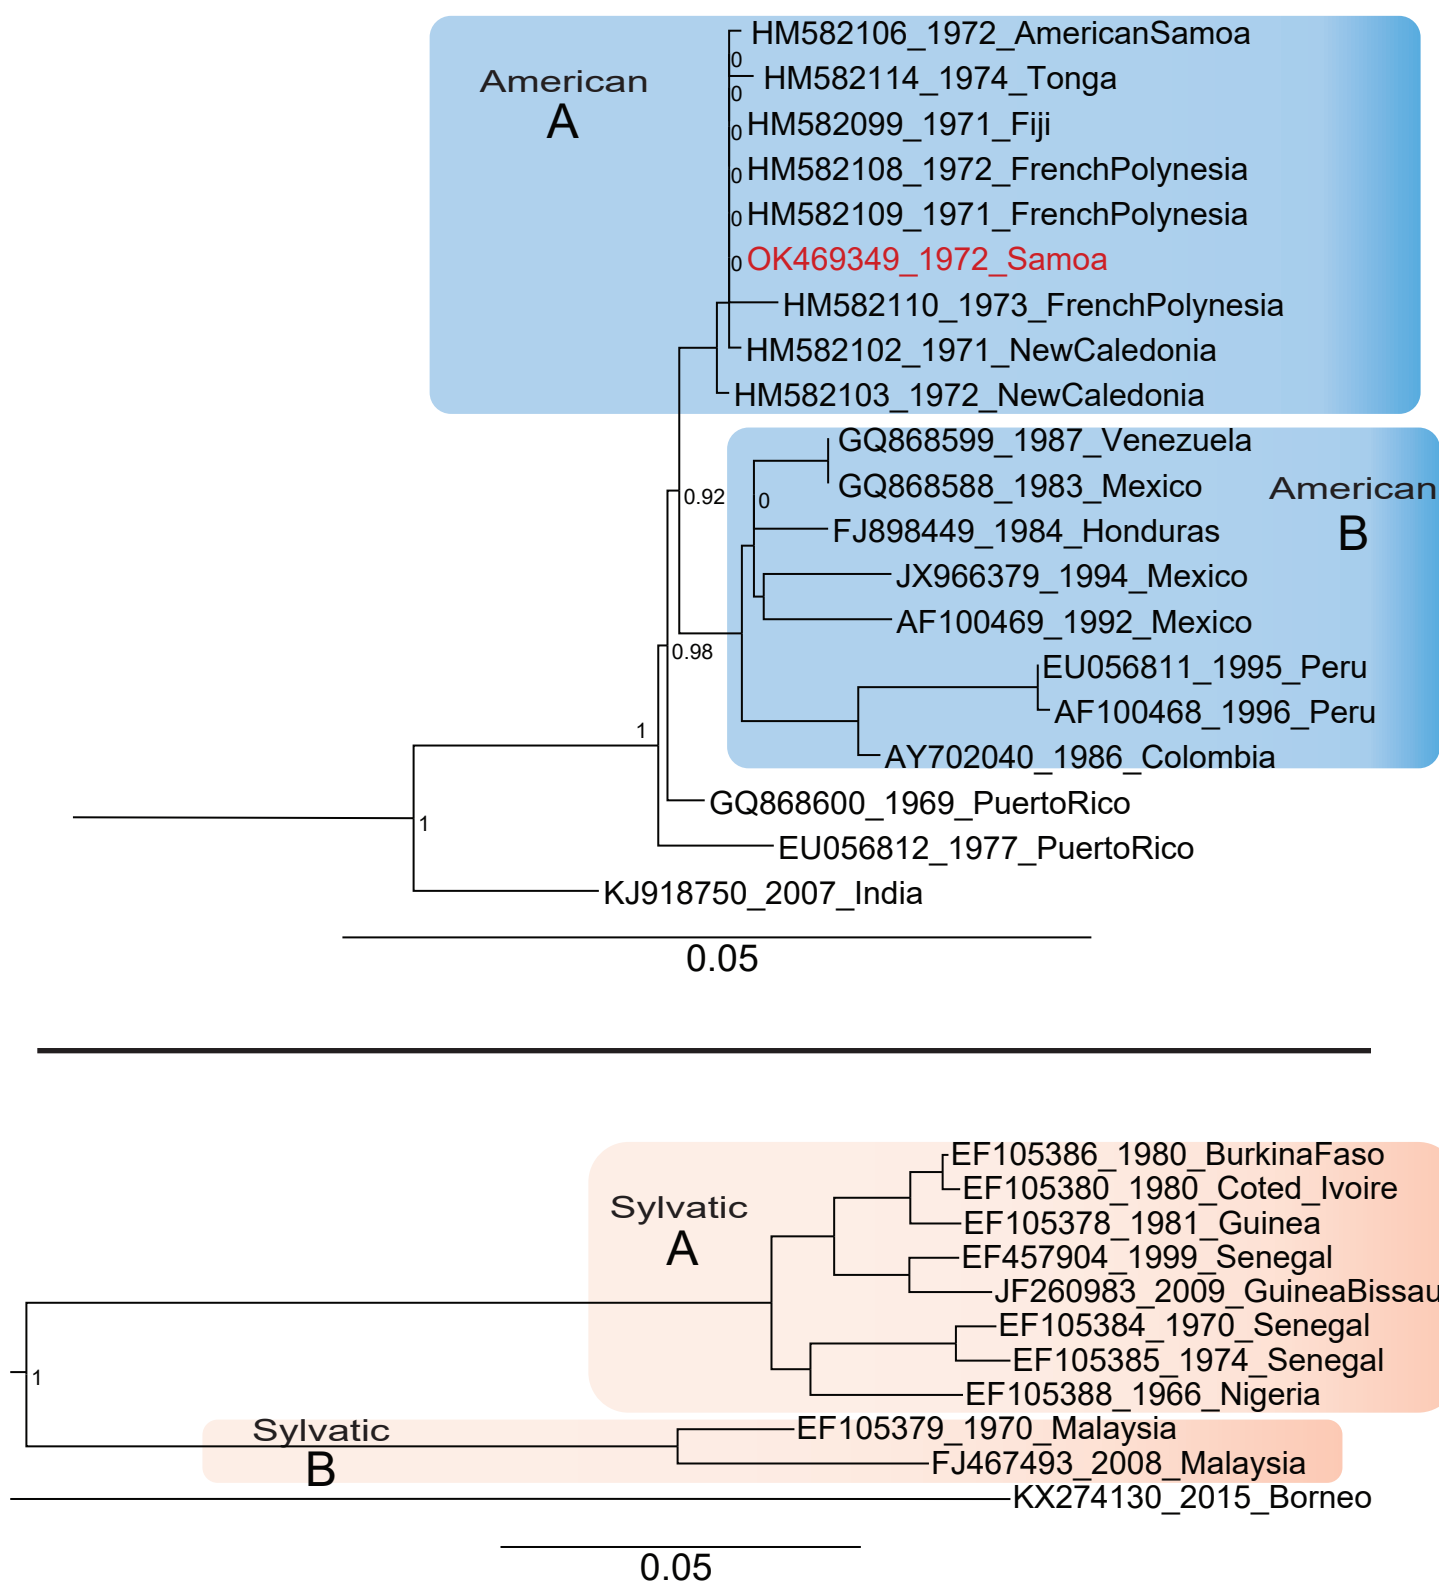

Figure S4d

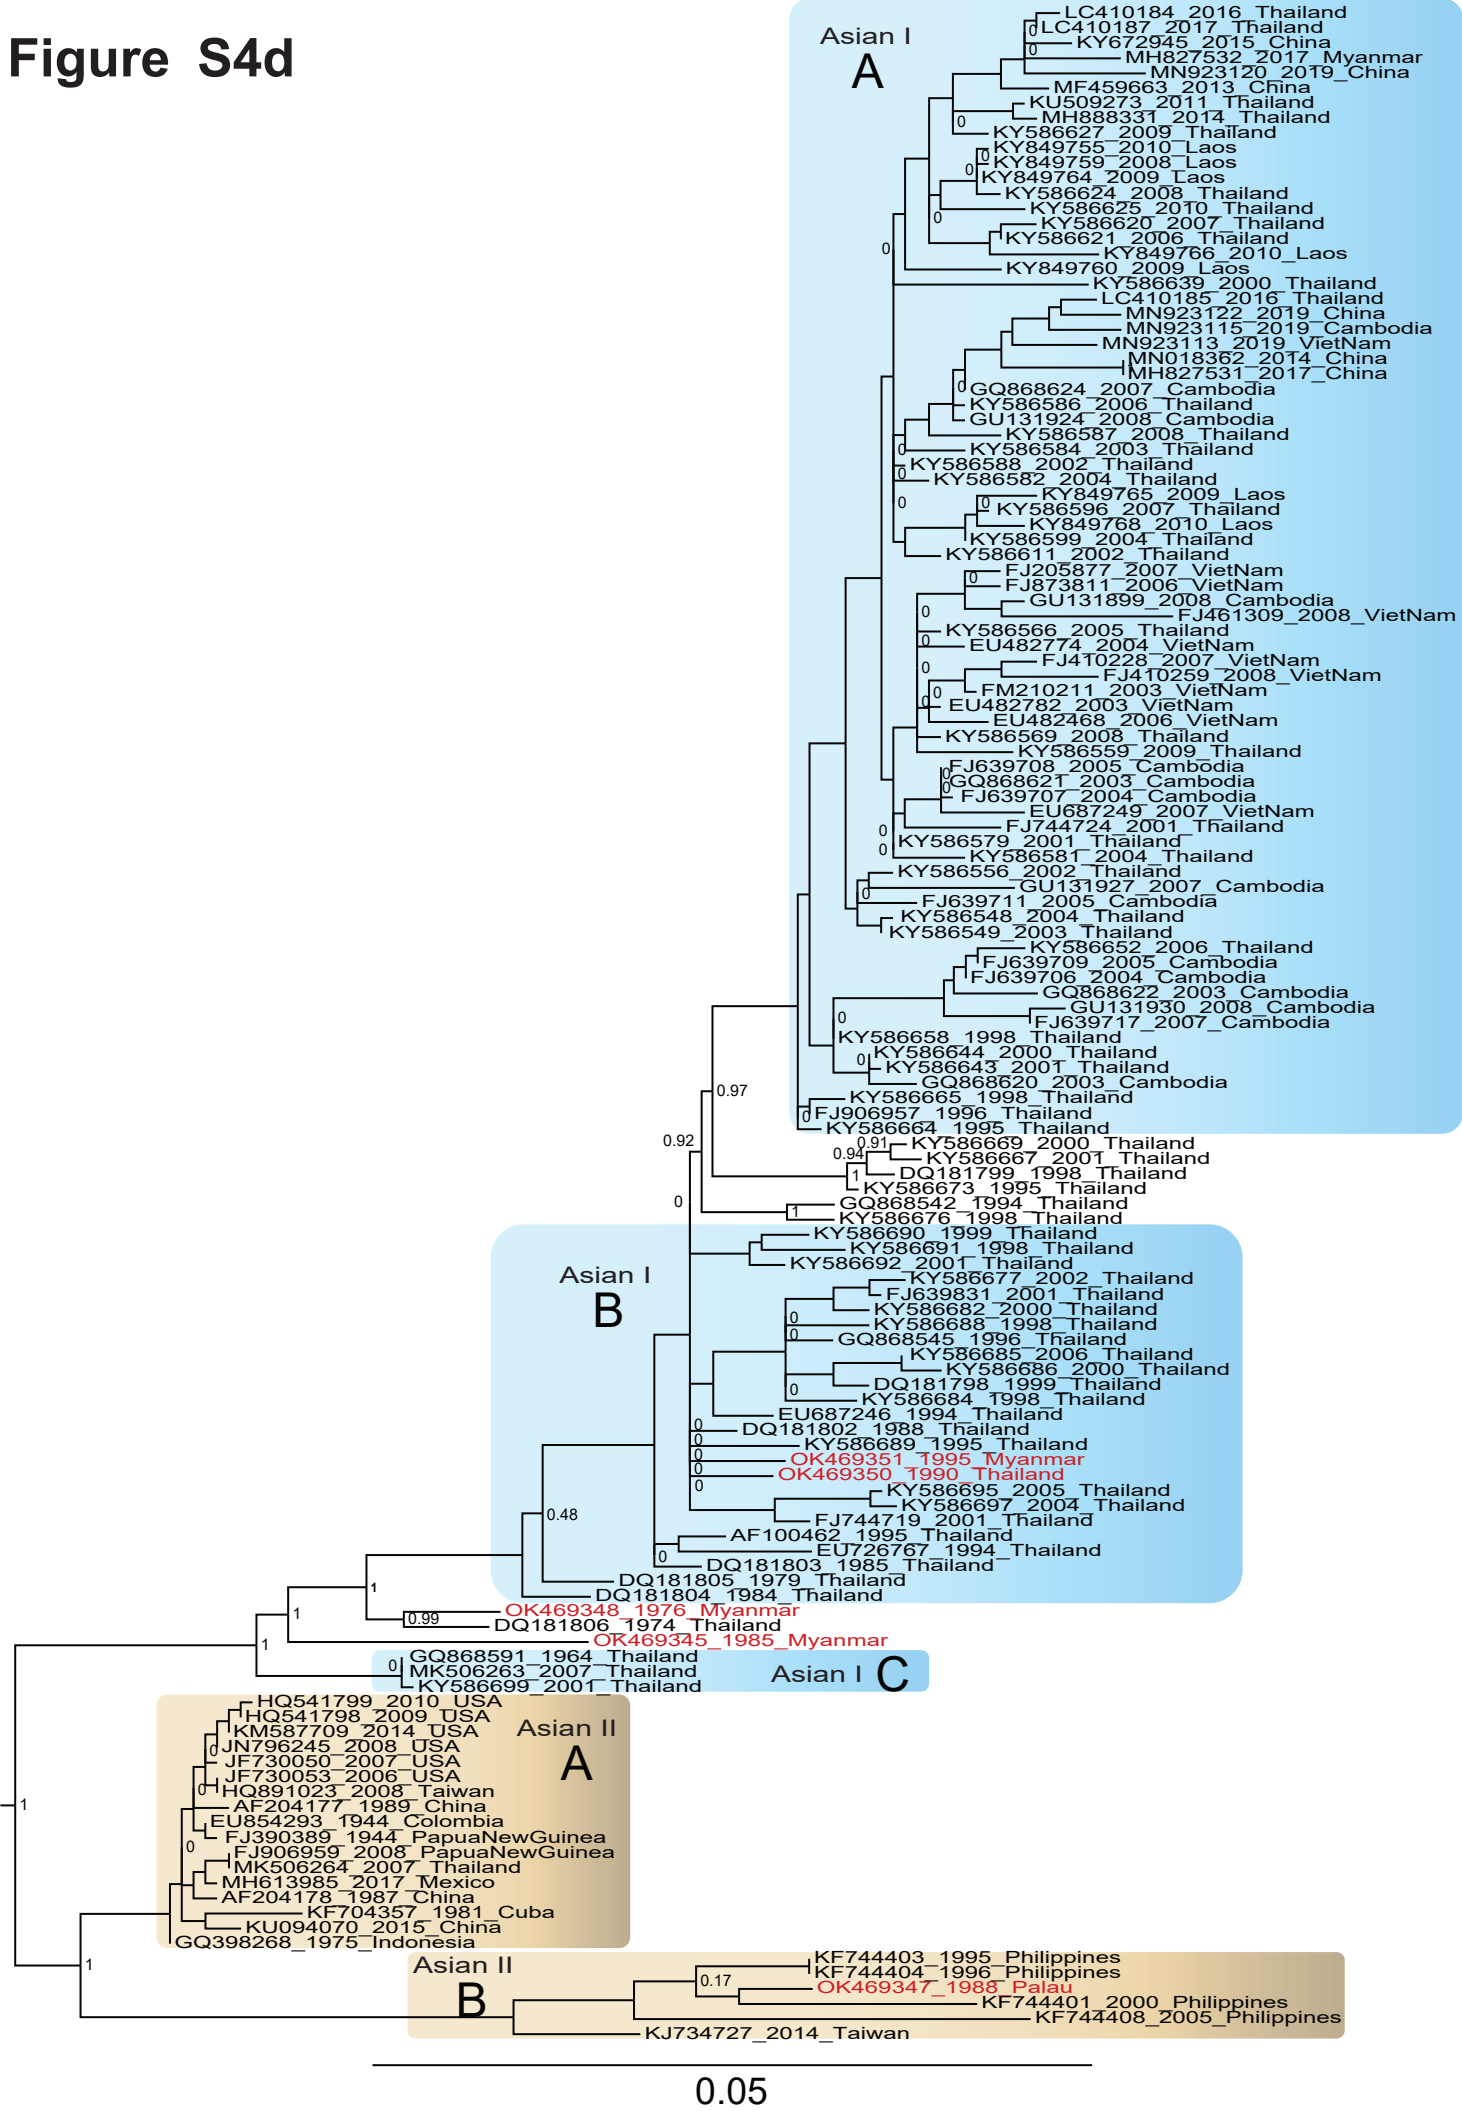

### Figure S4e

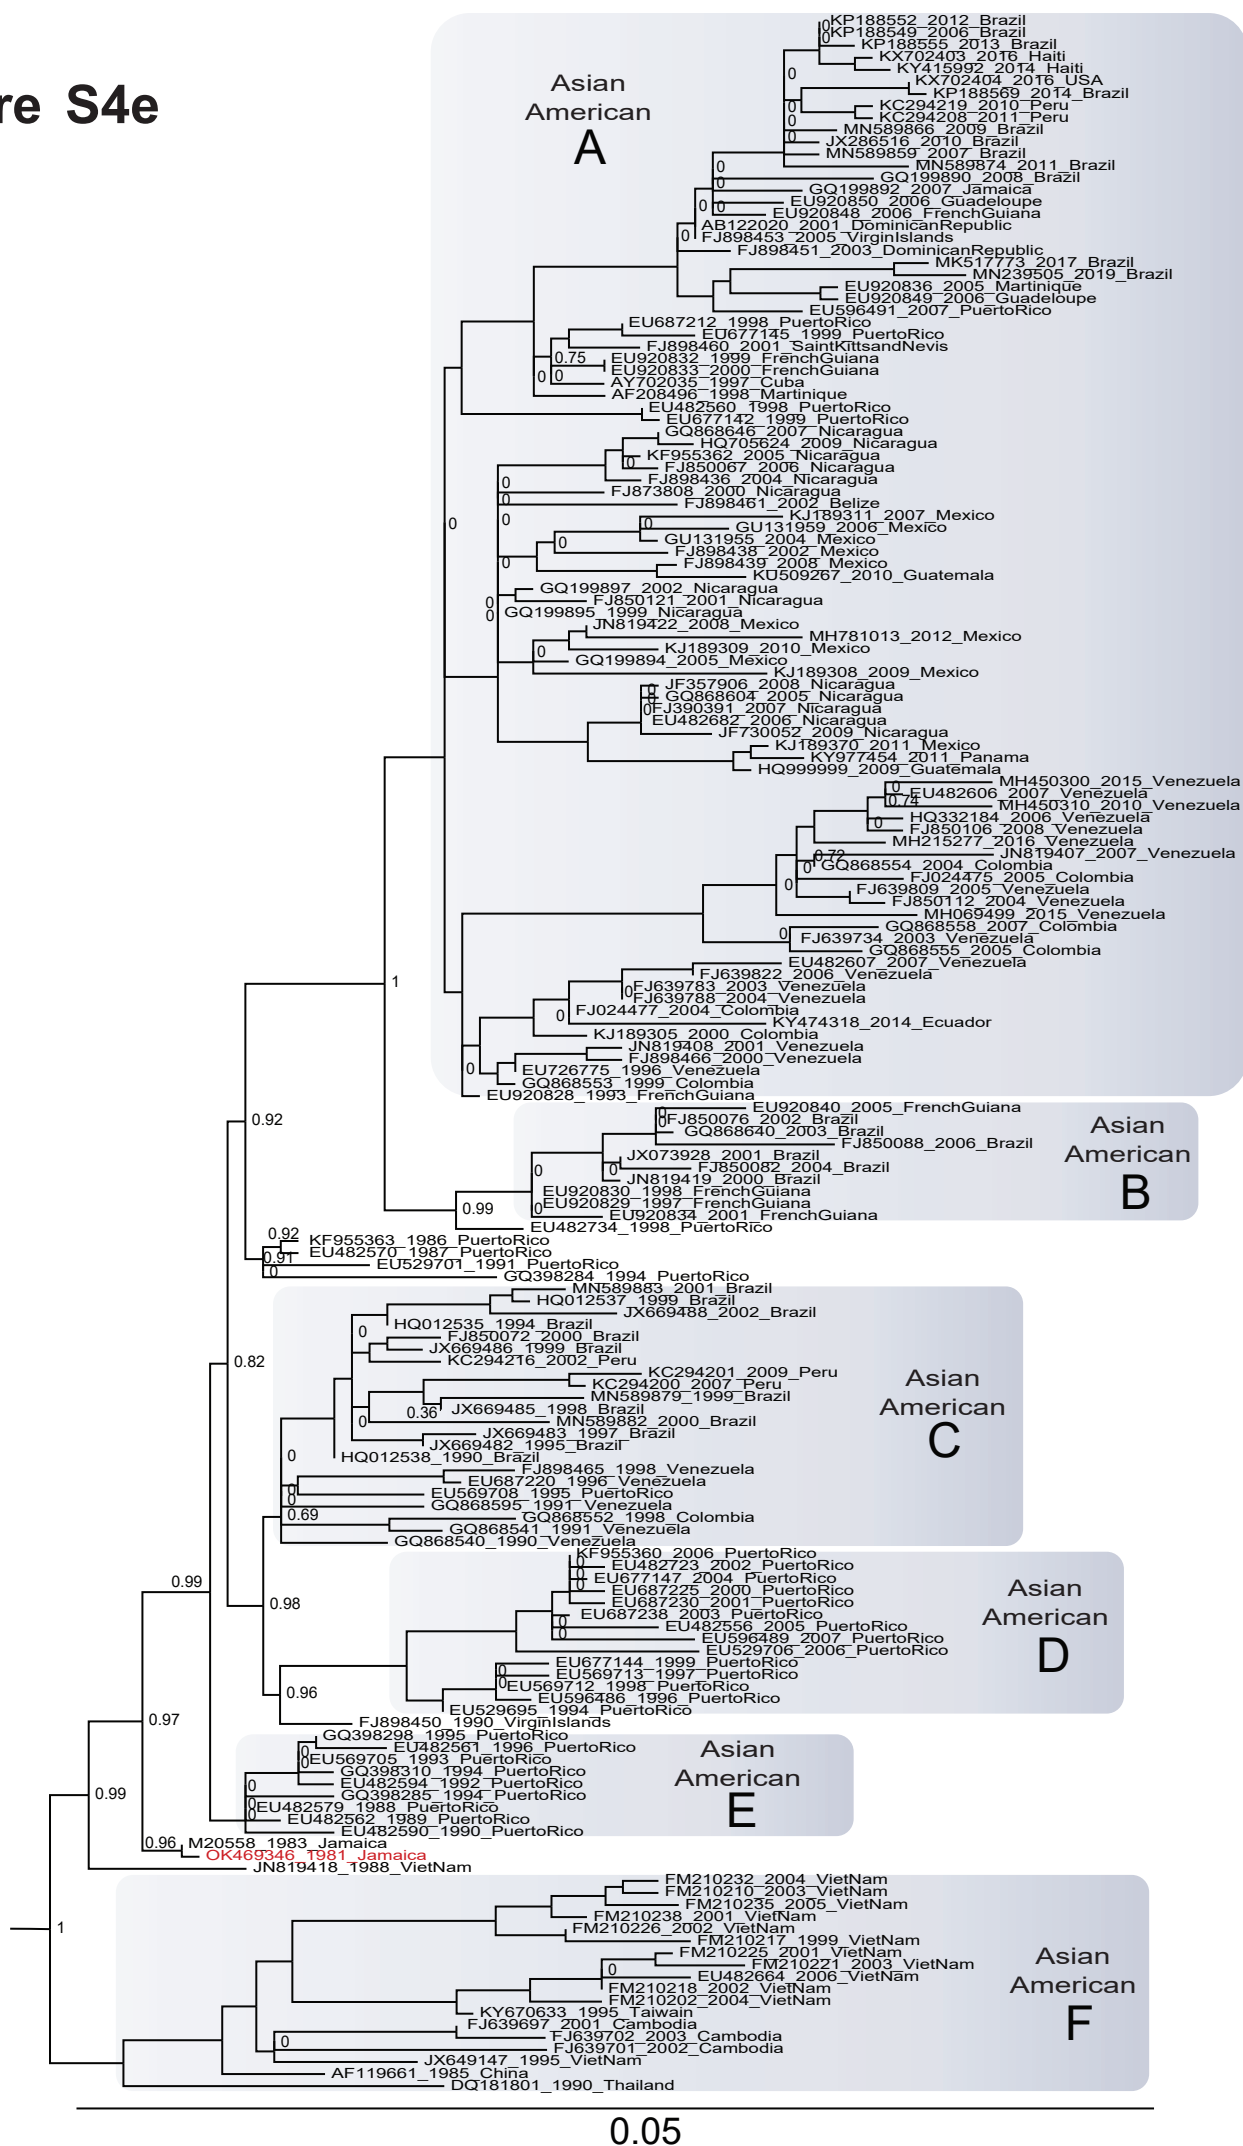

**Supplemental Figure S5: DENV3 Whole Genome ML Trees.** (a) DENV3 Whole Genome ML tree, (b) Genotype 3-III, (c) Genotype 3-II, (d) Genotype 3-I. aLRT SH-like branch support indicated for the major branches. Support values >0.8 have been eliminated in most instances for clarity. Red circles/font indicate newly sequenced isolates from the QUT Arbovirus collection. Branches under positive selection (see section 3.2.2) are indicated by a red star.

Figure S5a

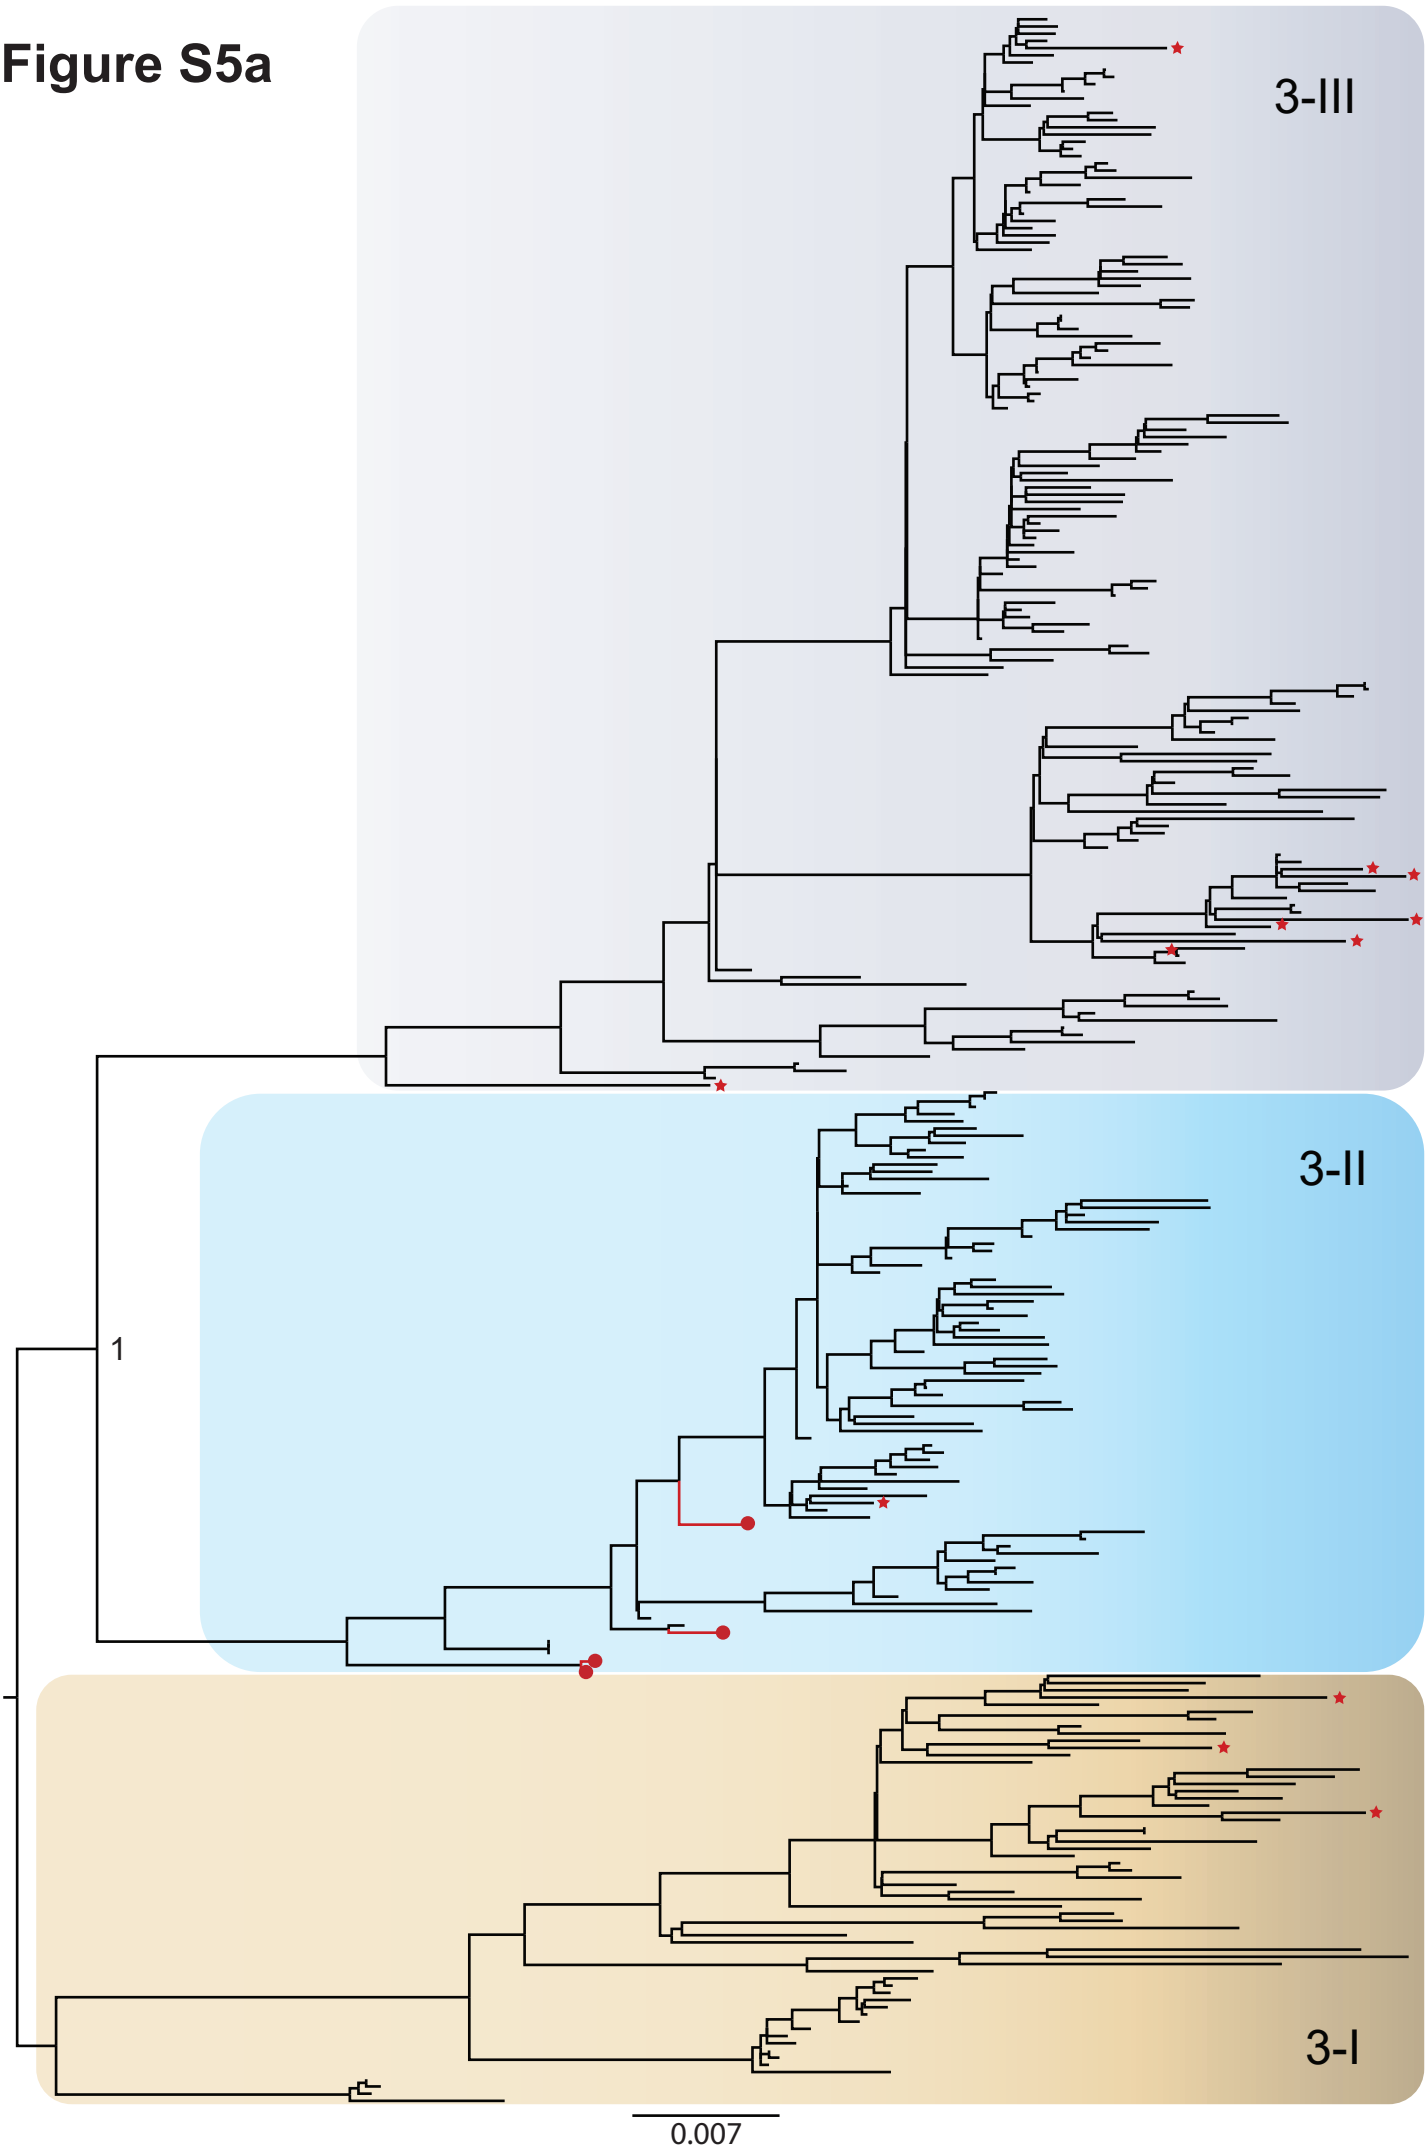



Figure S5b

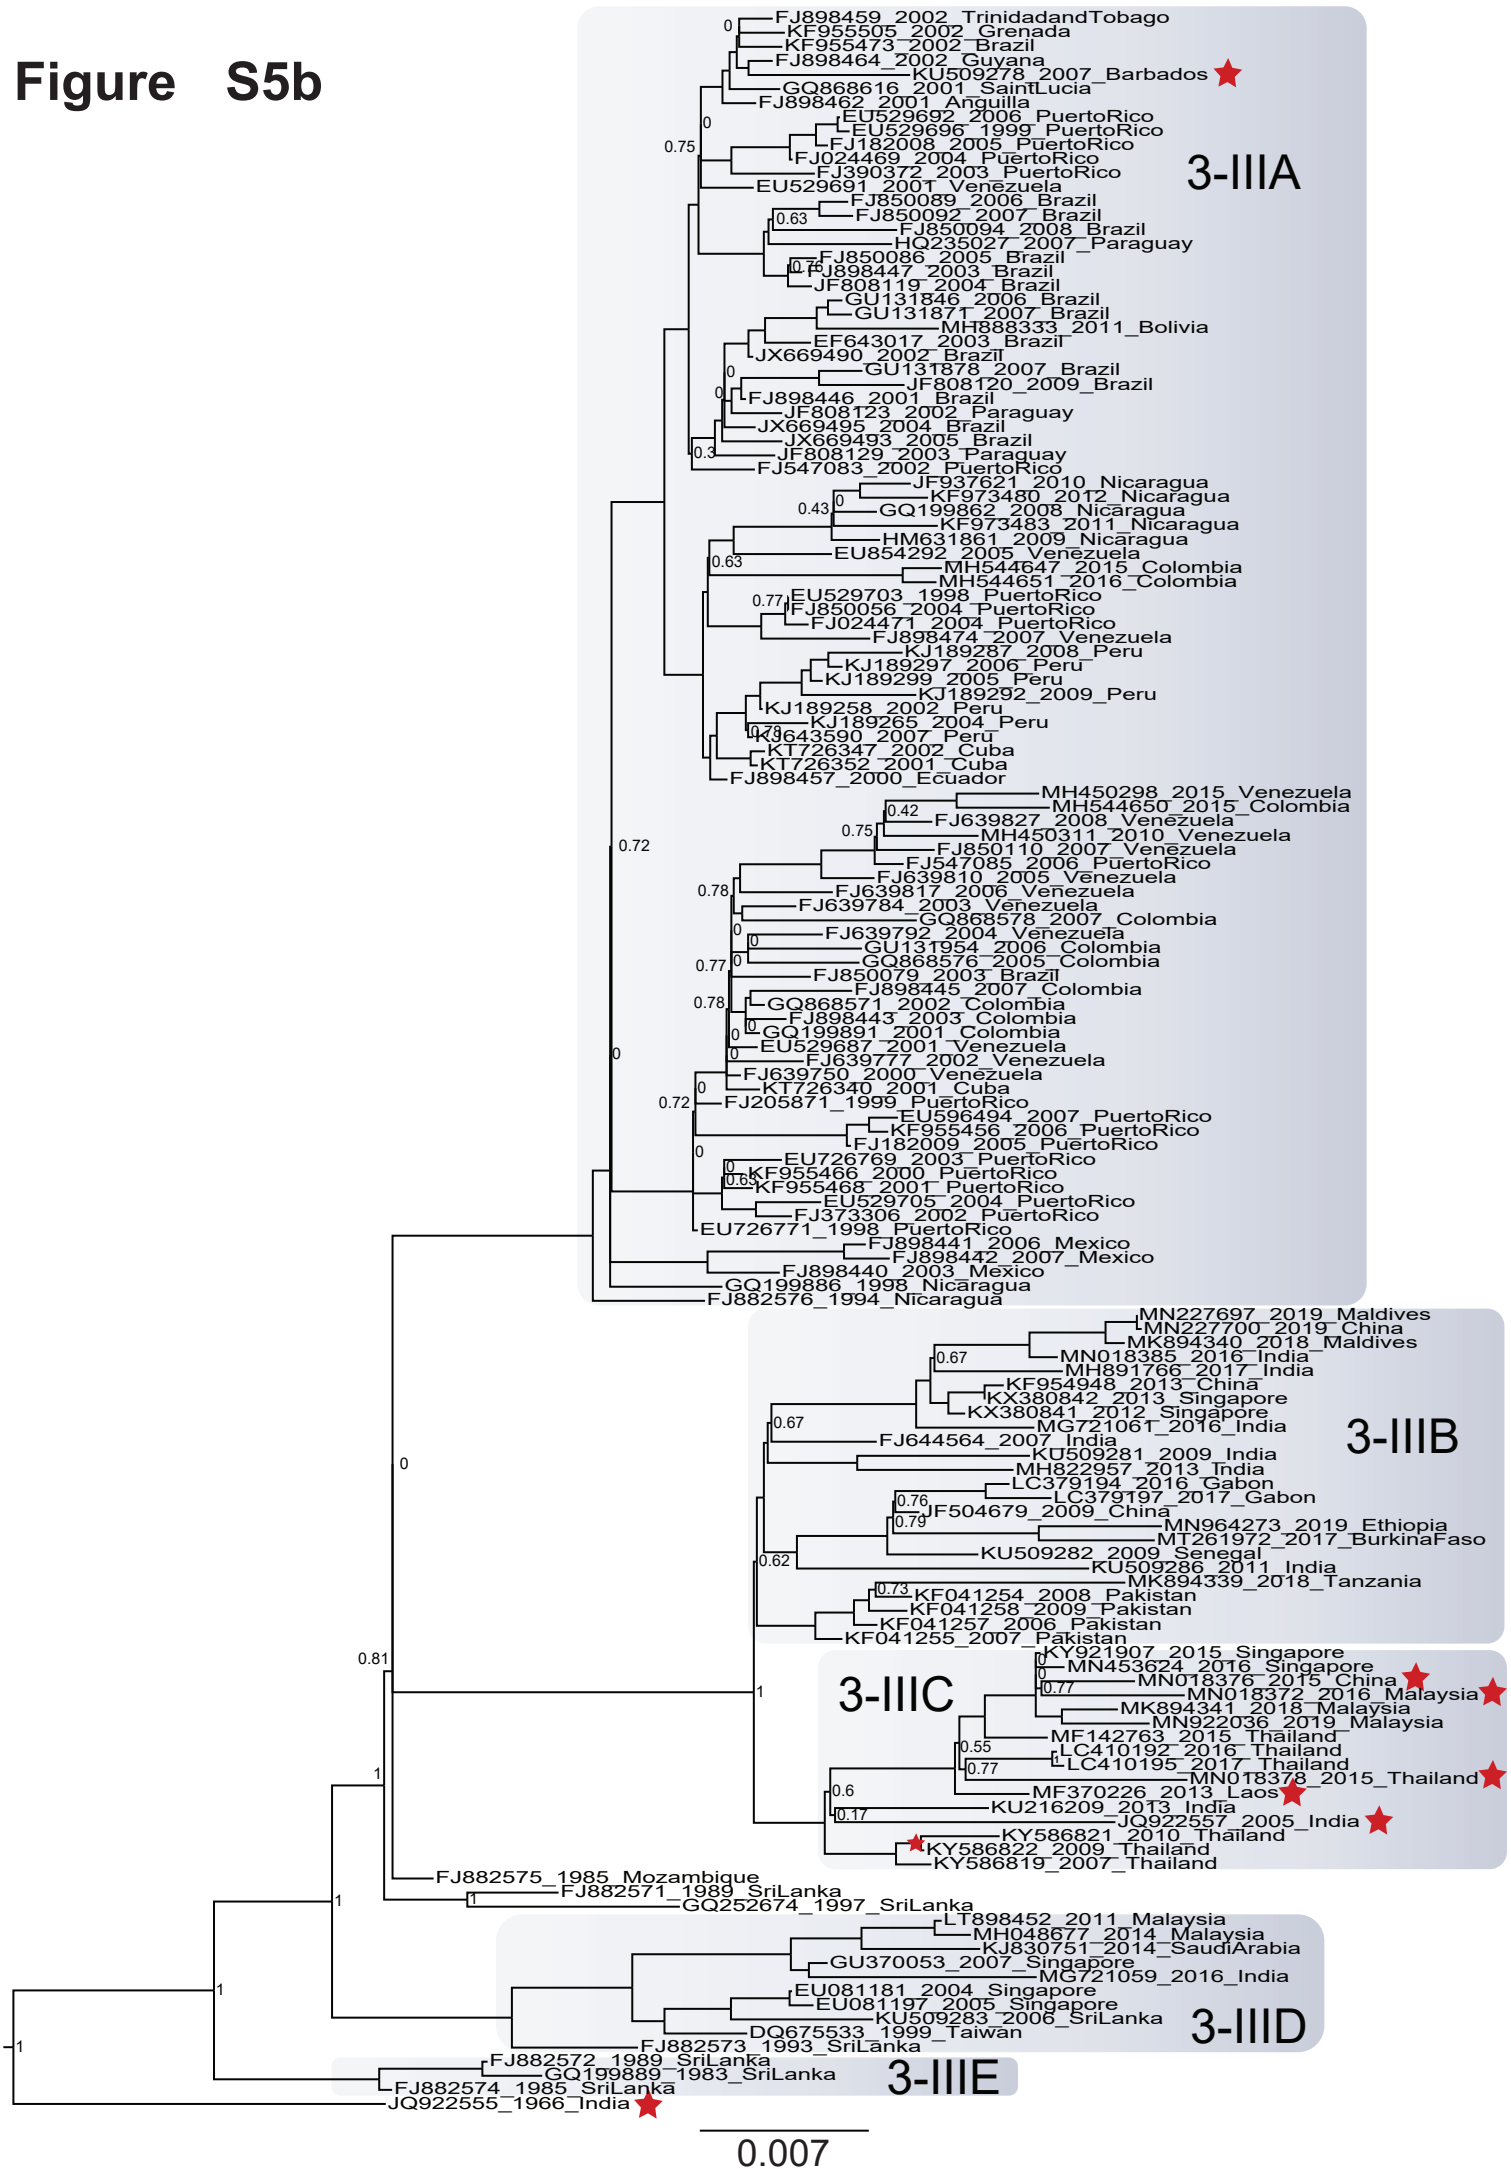

**Figure S5c**

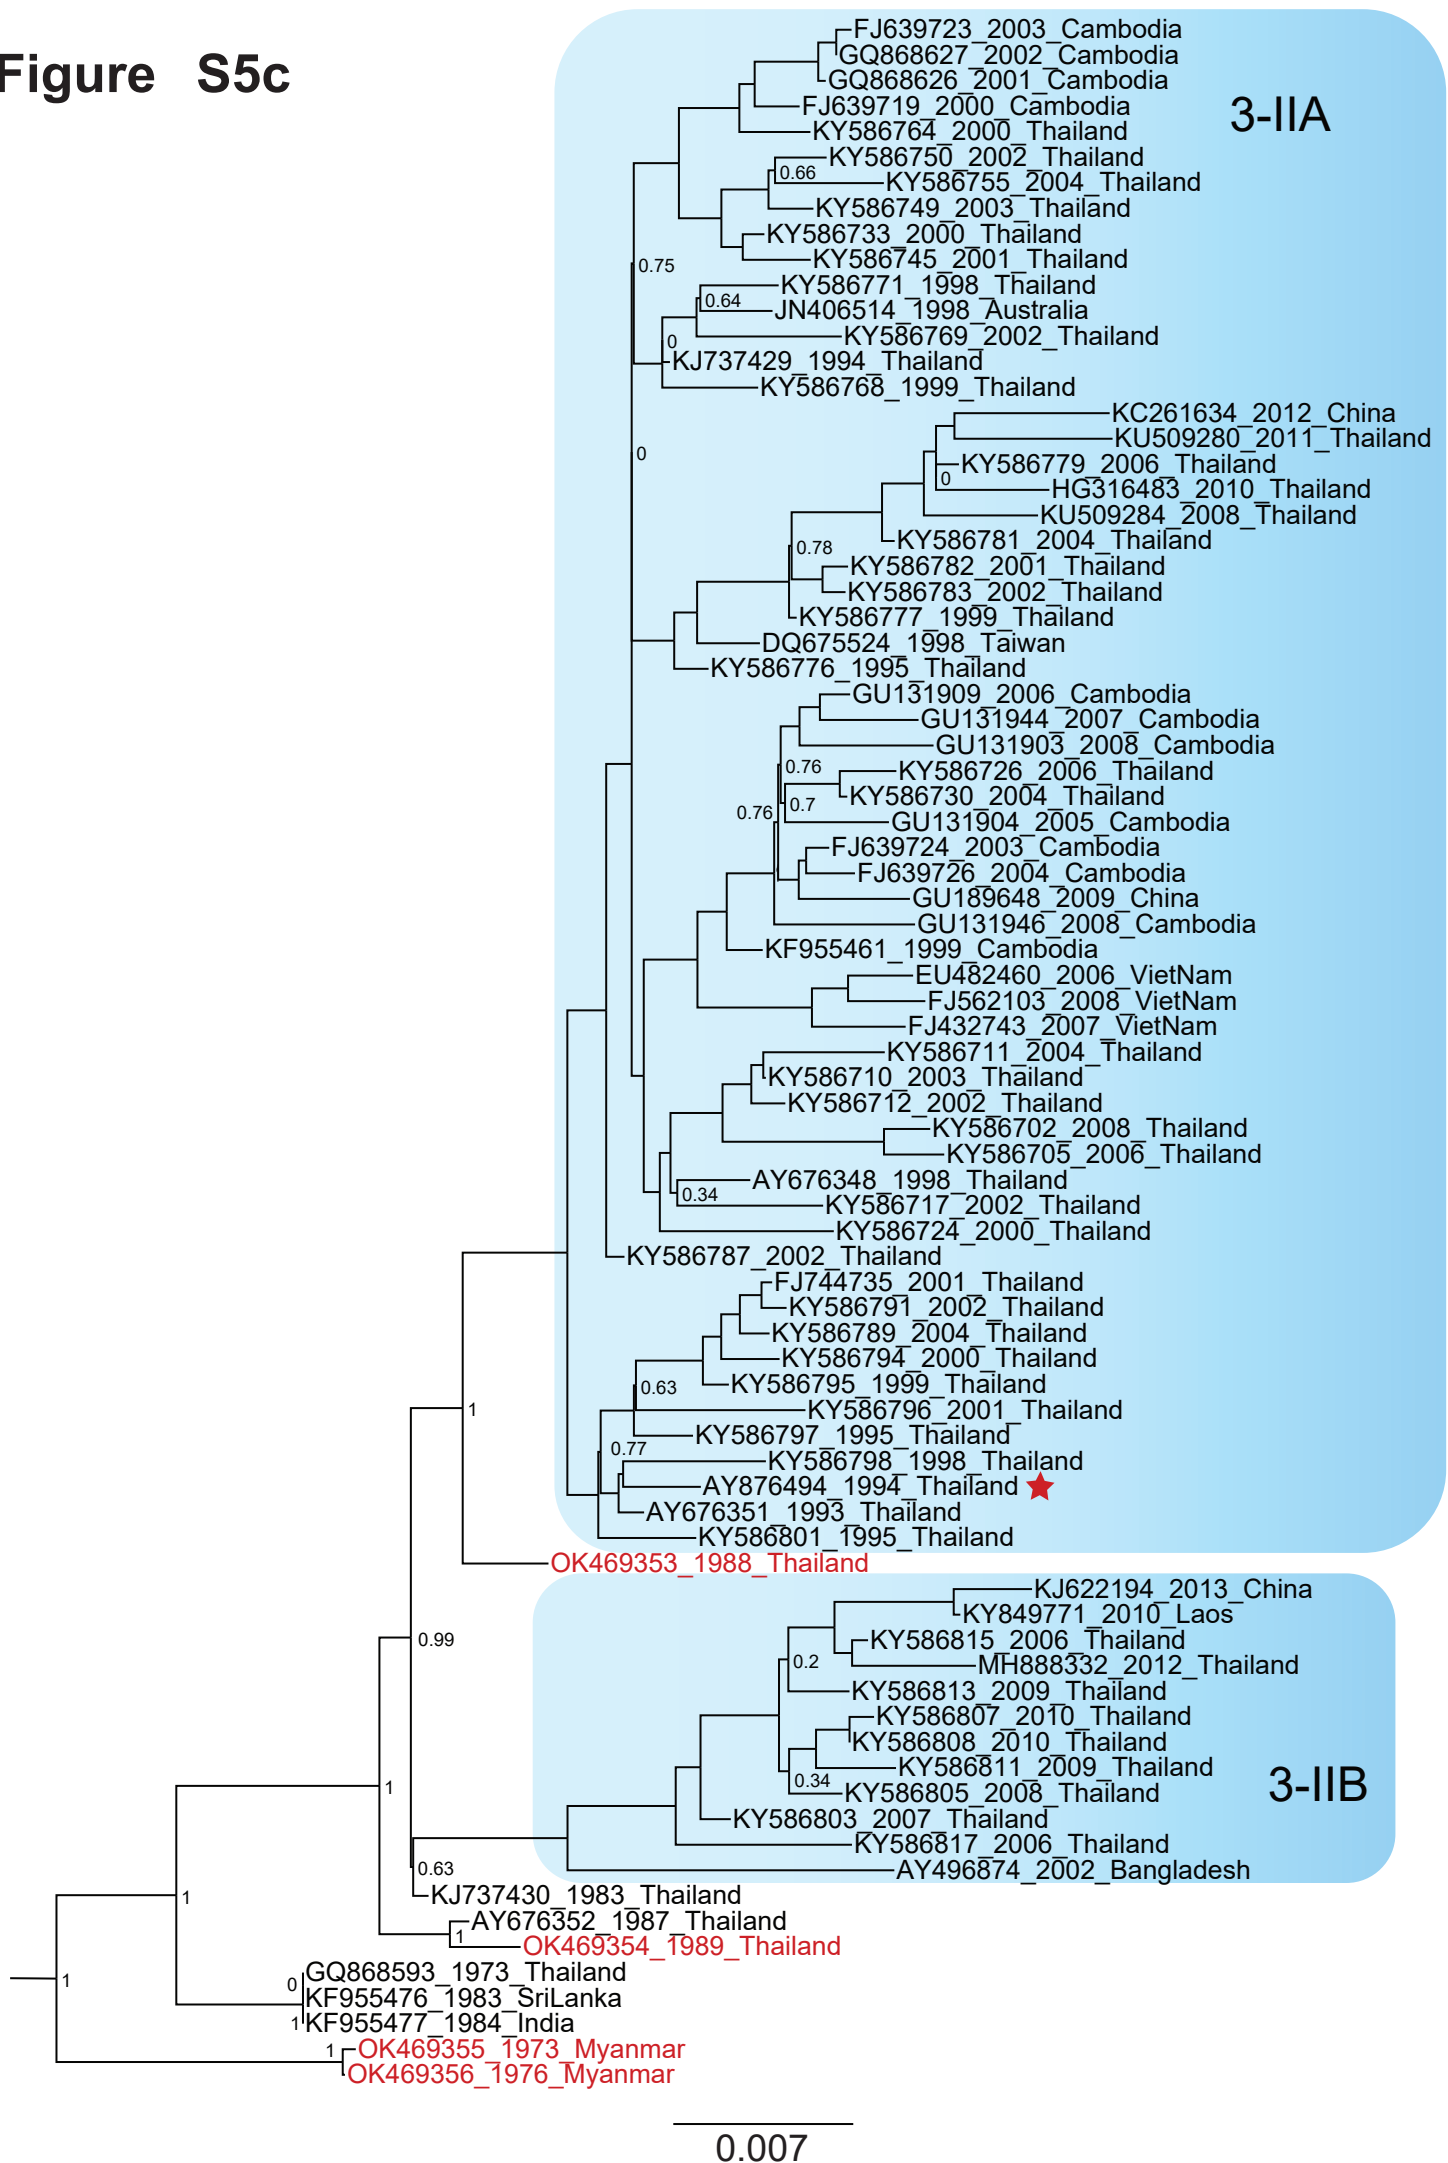

Figure S5d

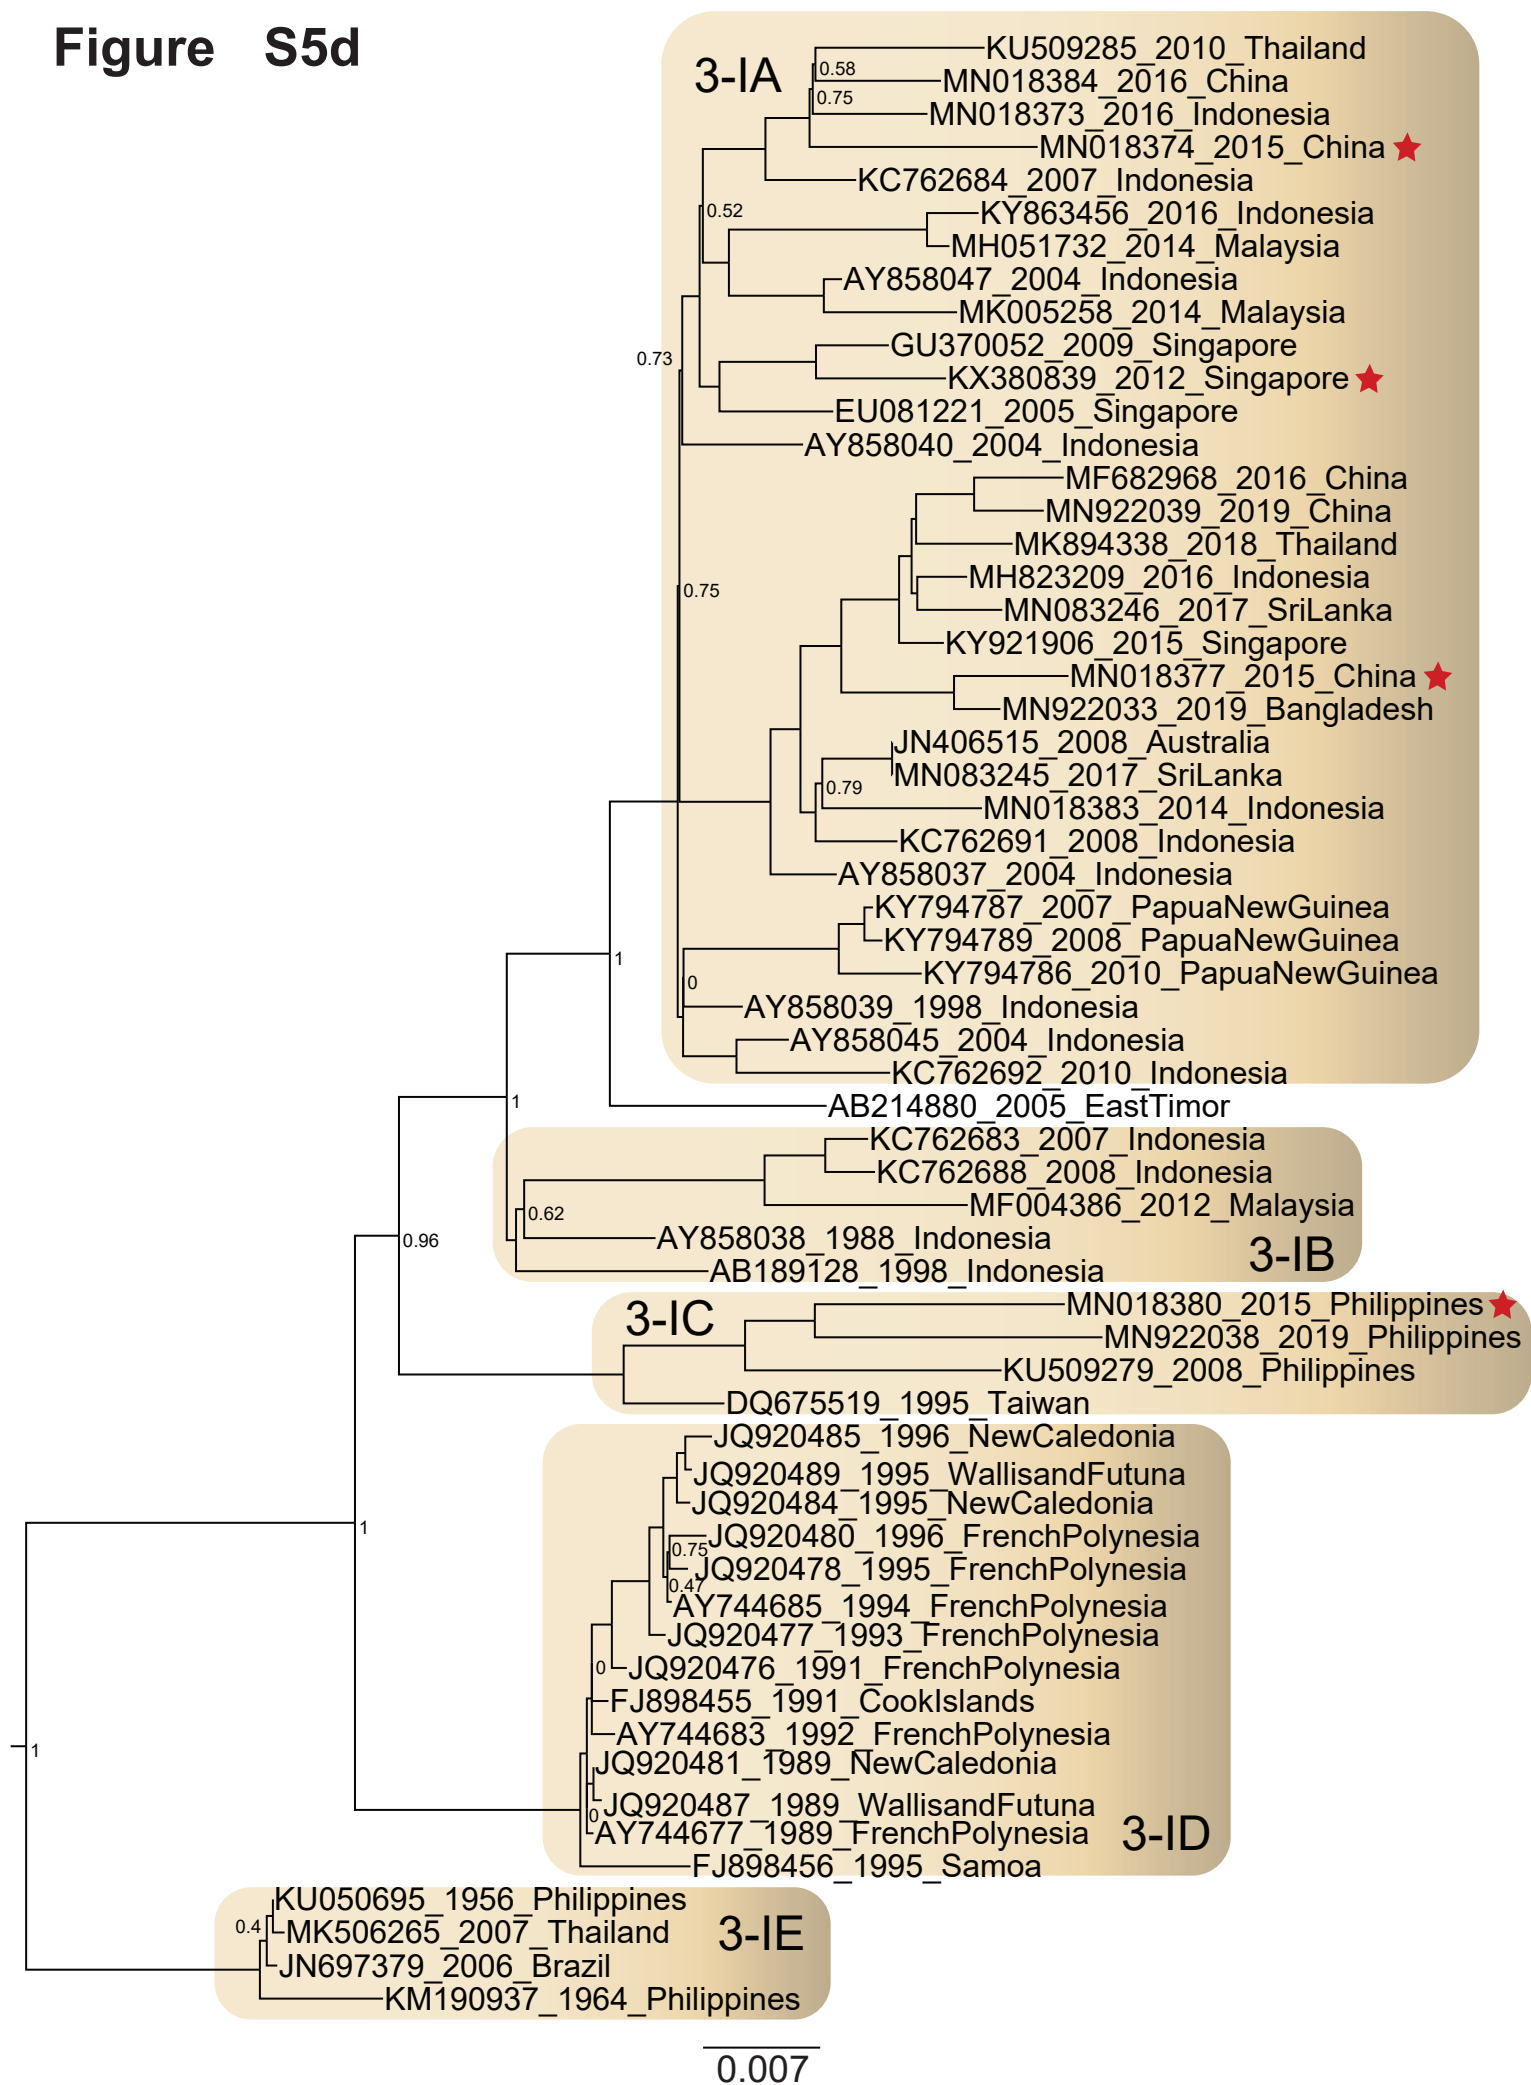

**Supplemental Figure S6: DENV3 E Gene ML Trees.** (a) DENV3 E gene ML tree, (b) Genotype 3-III, (c) Genotype 3-II, (d) Genotype 3-I. aLRT SH-like branch support indicated for the major branches. Support values >0.8 have been eliminated in most instances for clarity. Red circles/font indicate newly sequenced isolates from the QUT Arbovirus collection. Branches under positive selection (see section 3.2.2) are indicated by a red star.

Figure S6a

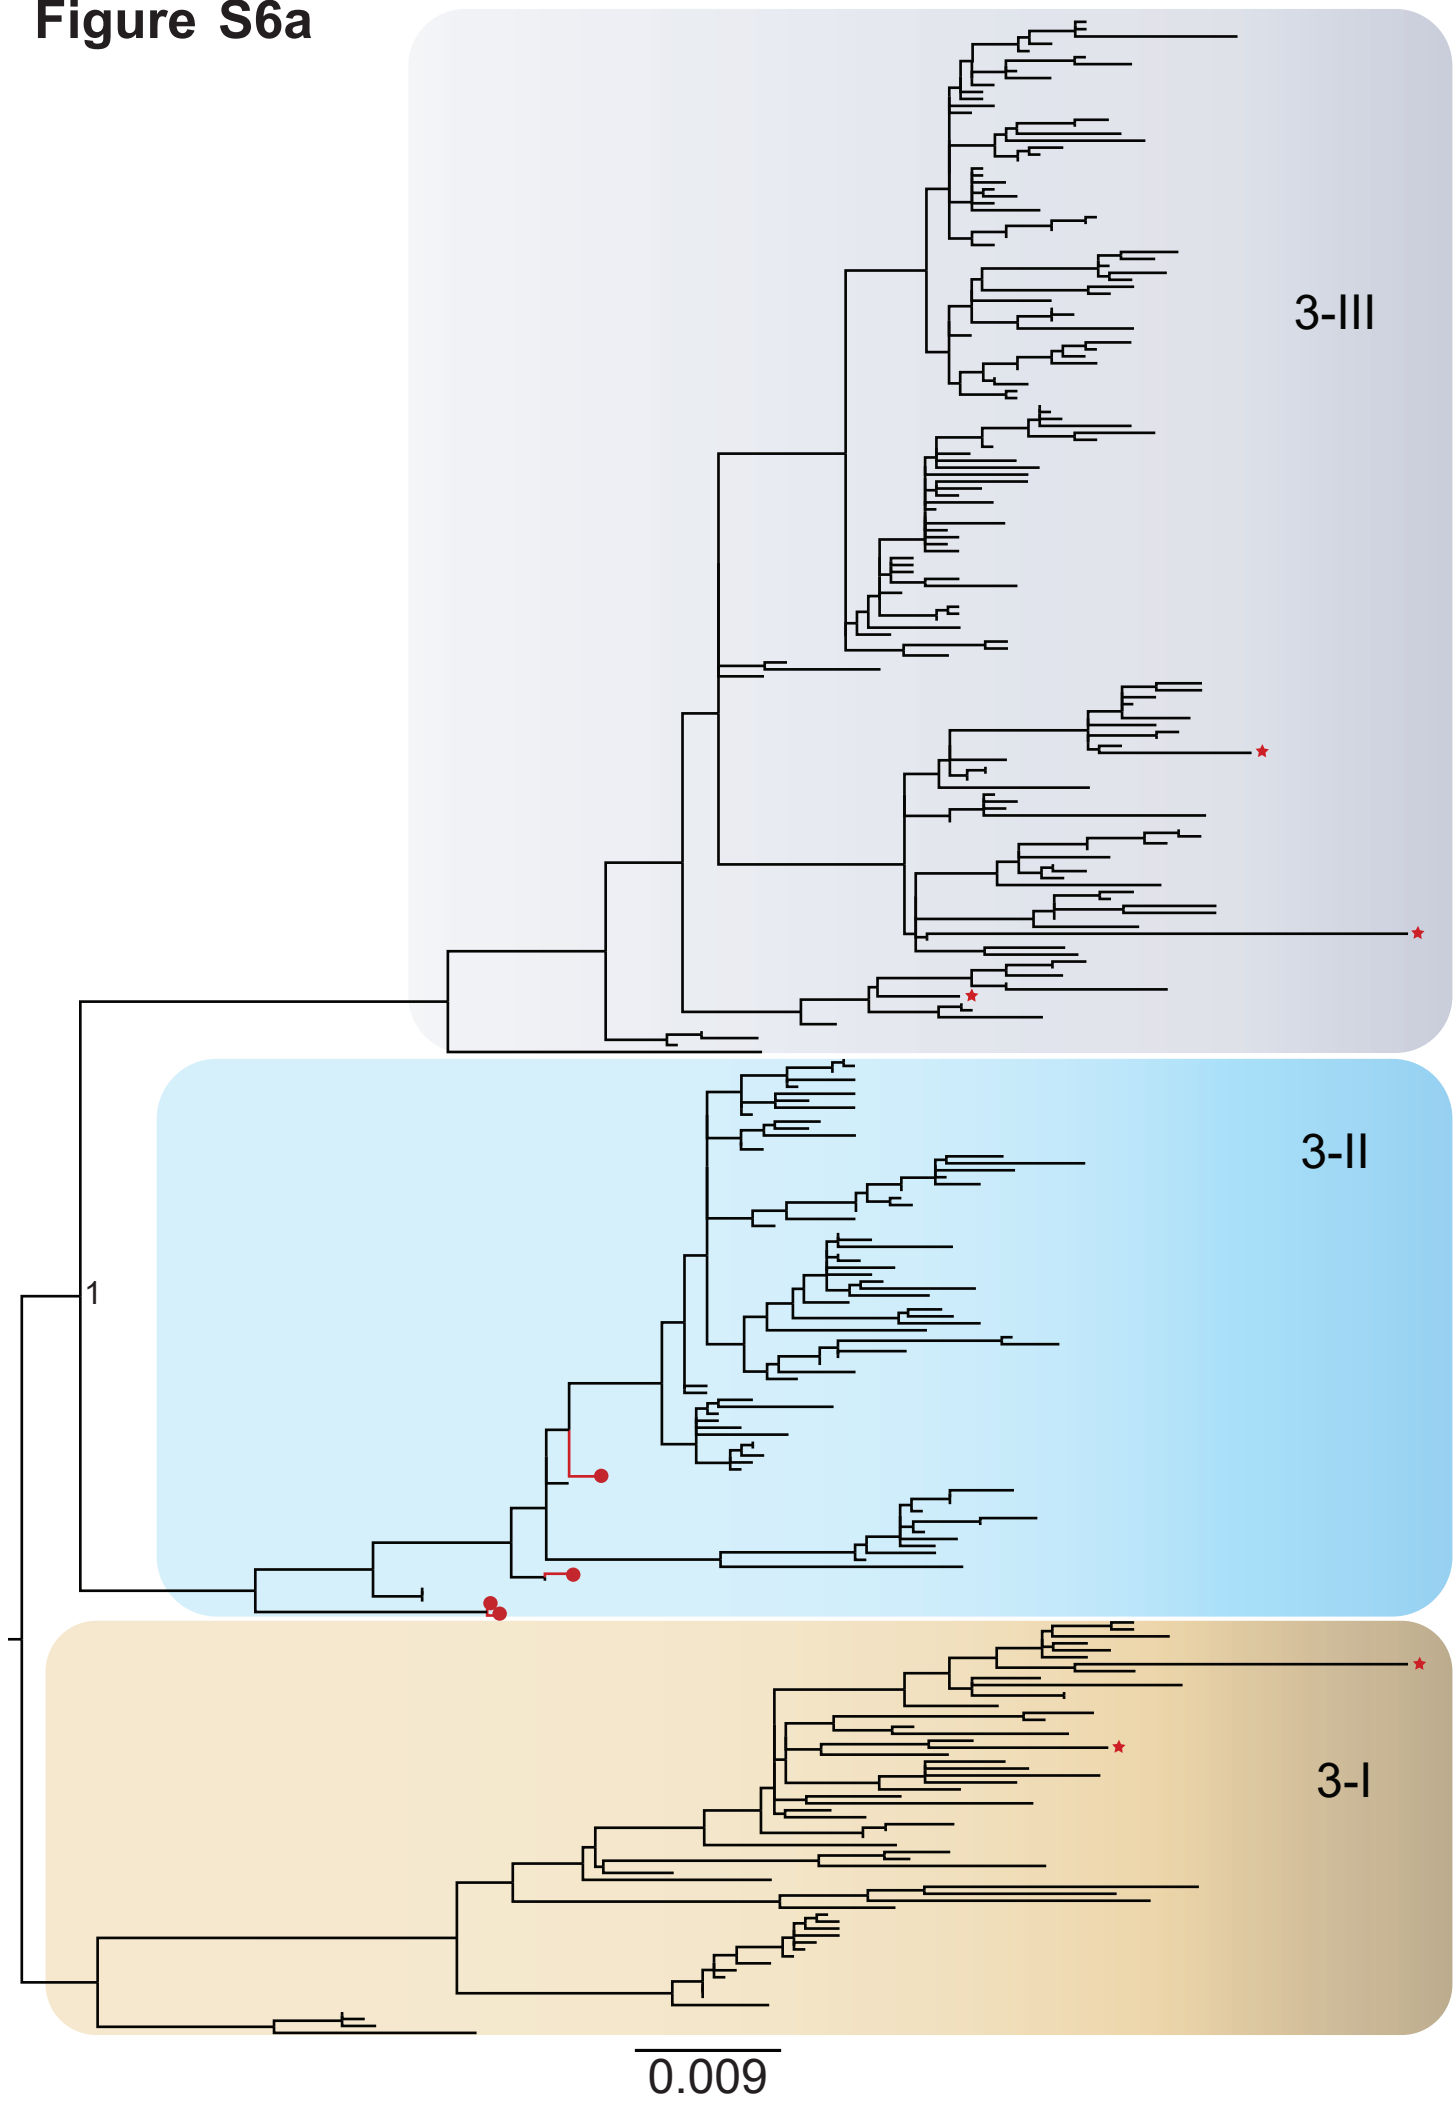

Figure S6b

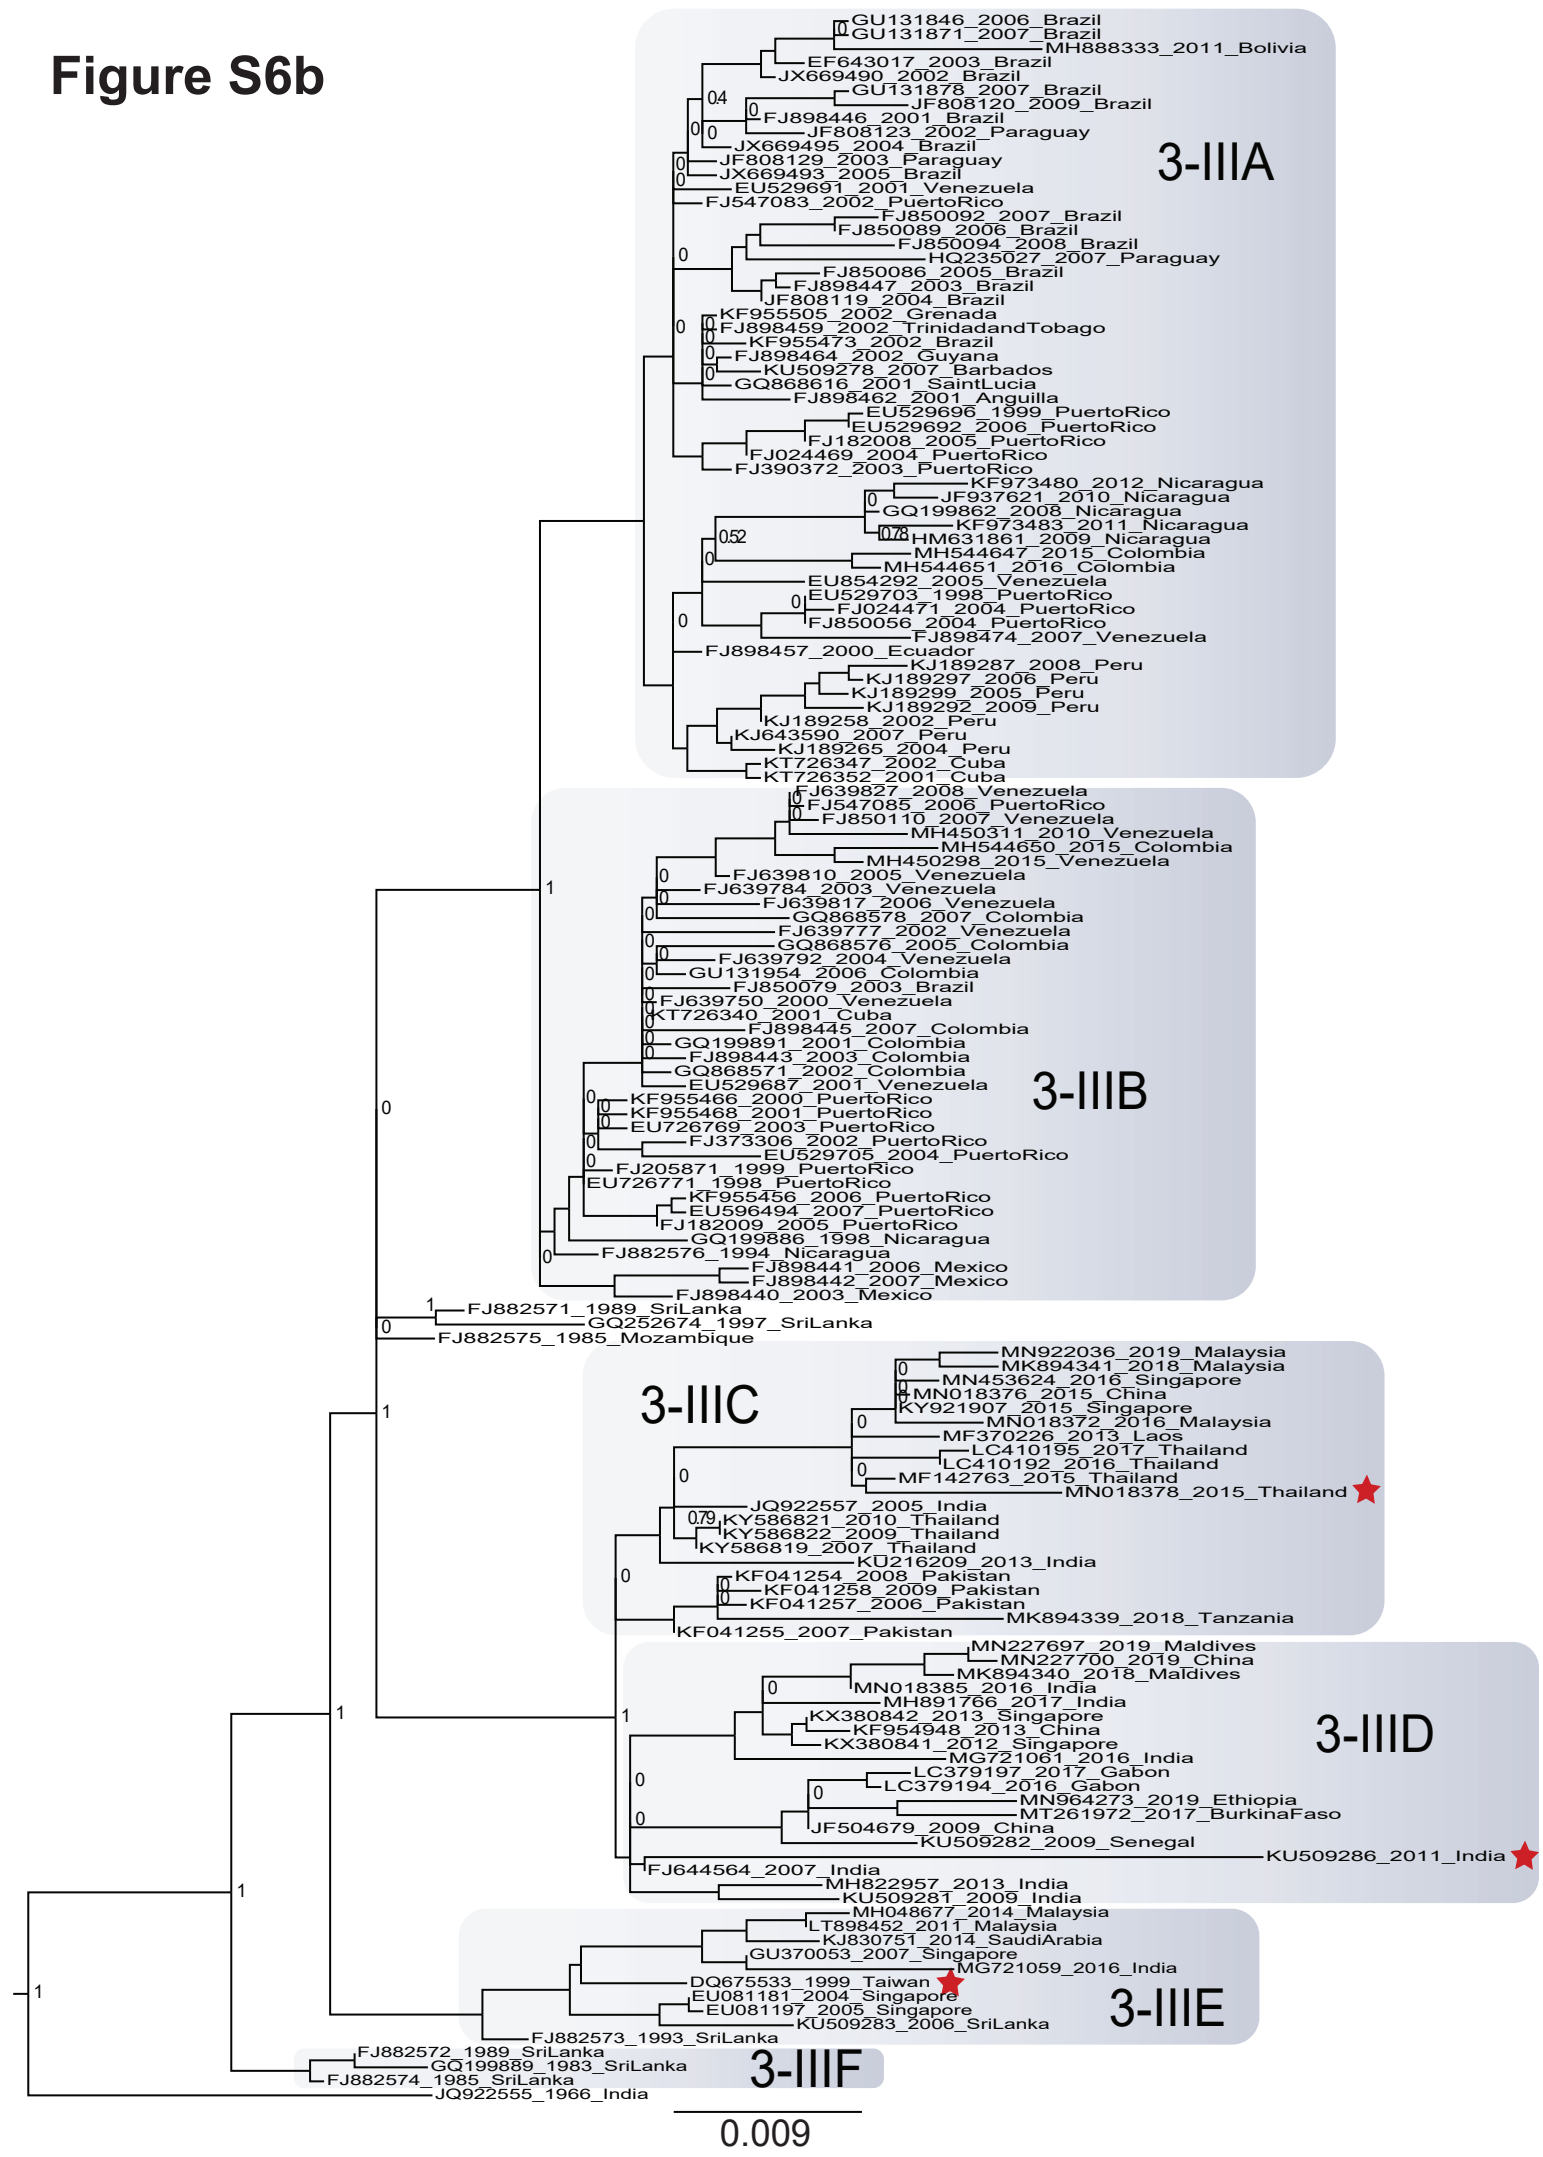



Figure S6c

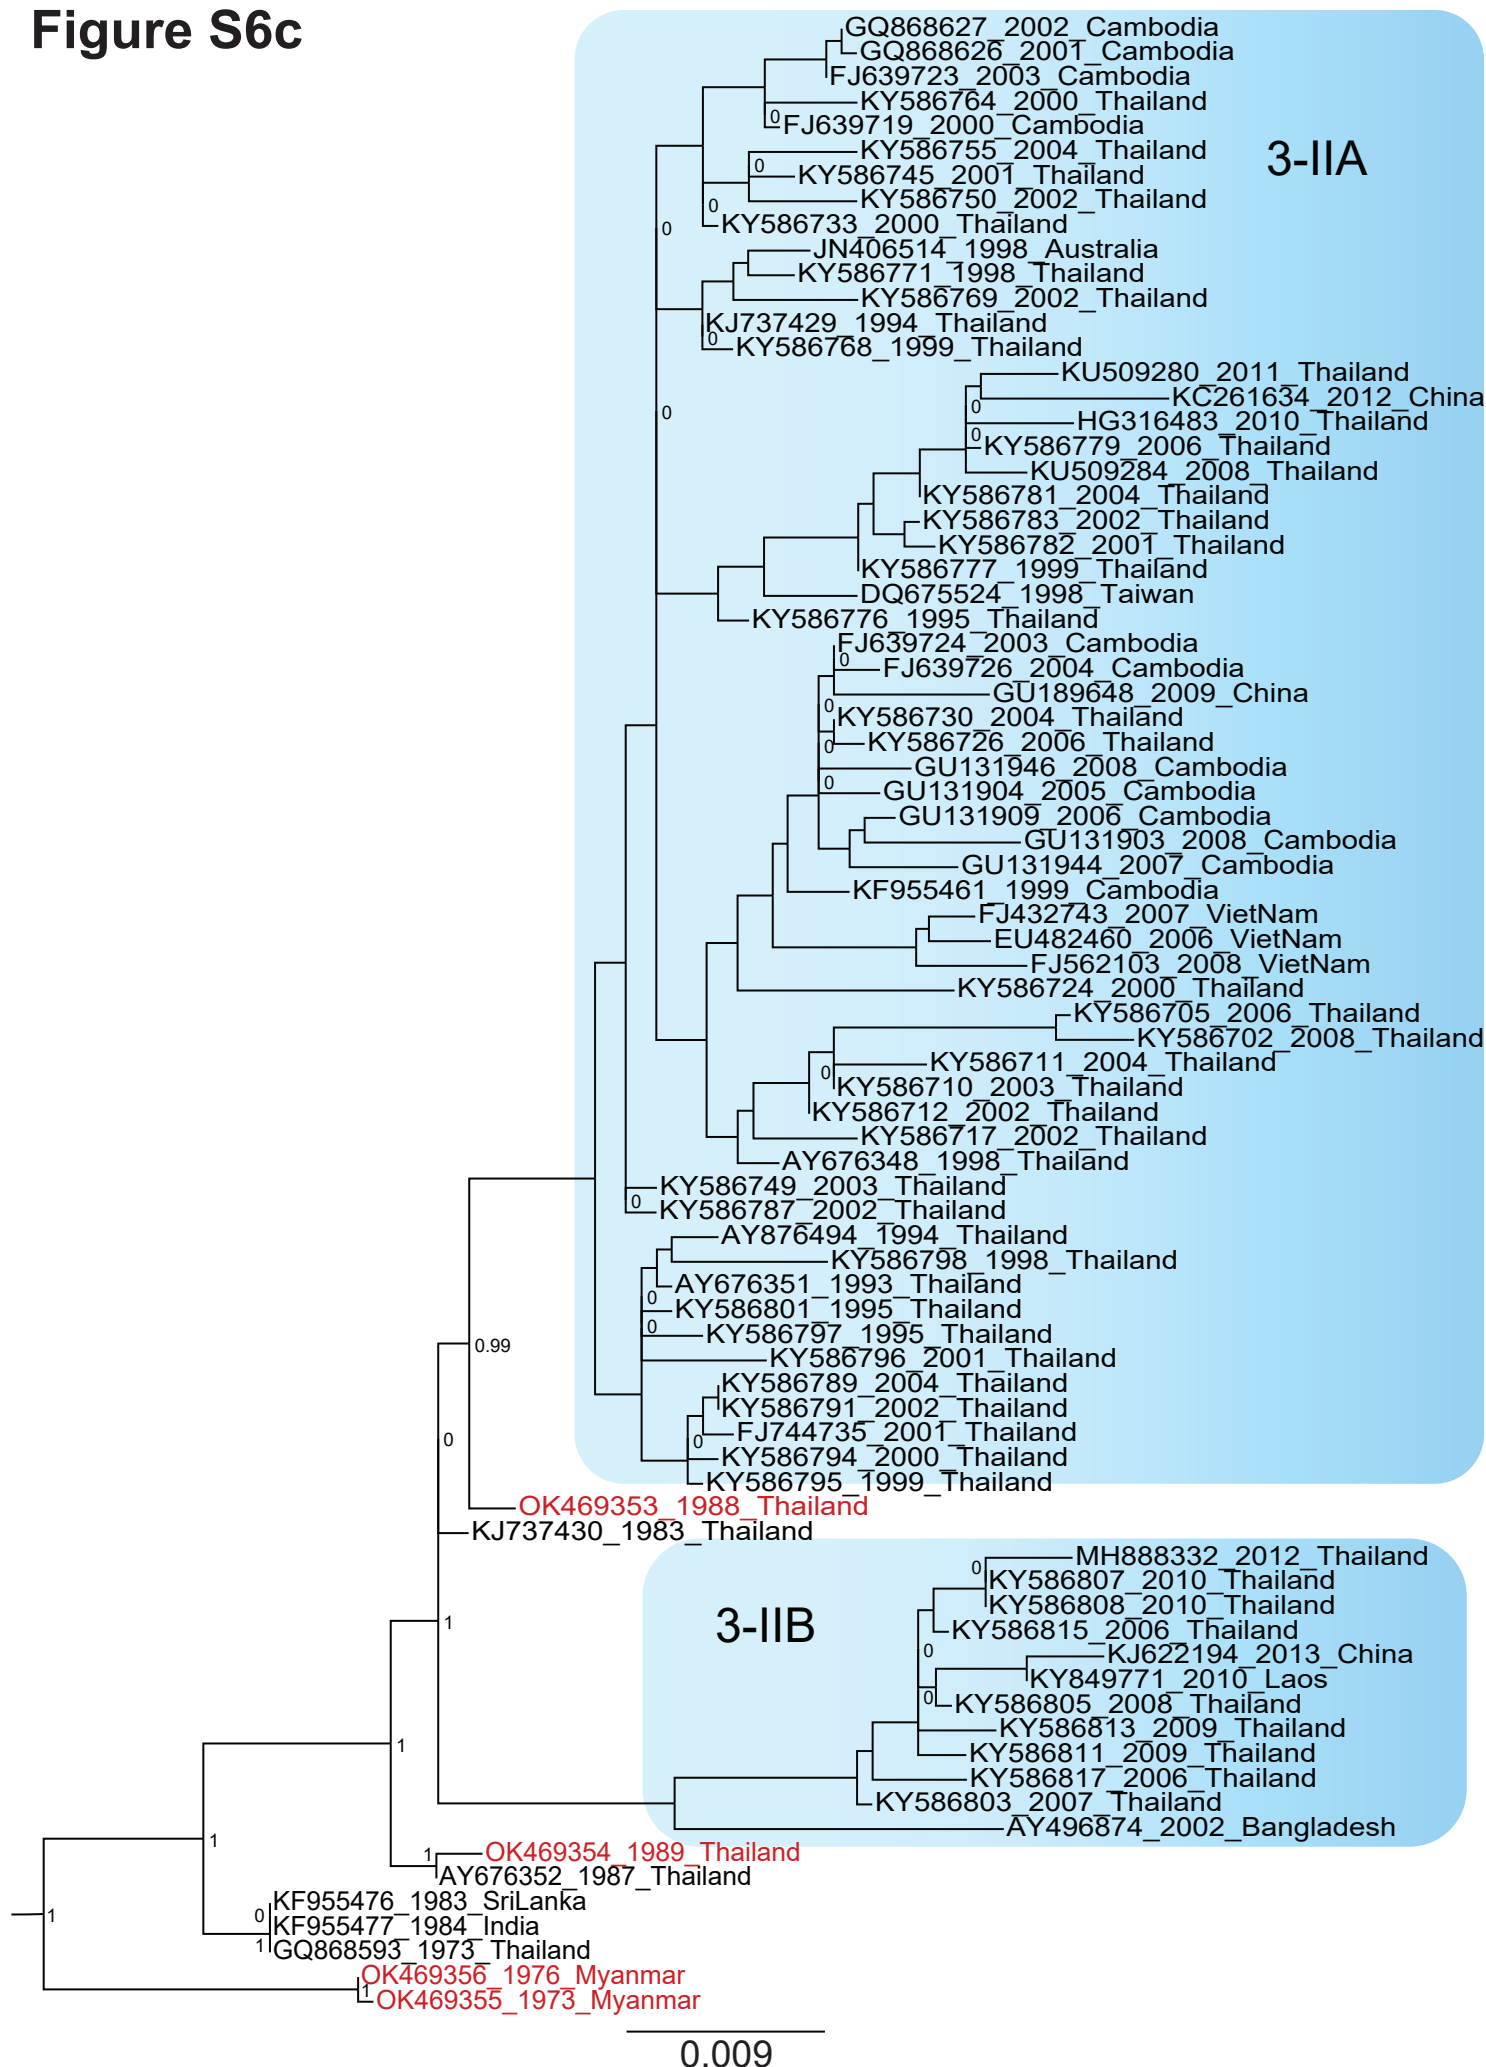

Figure S6d

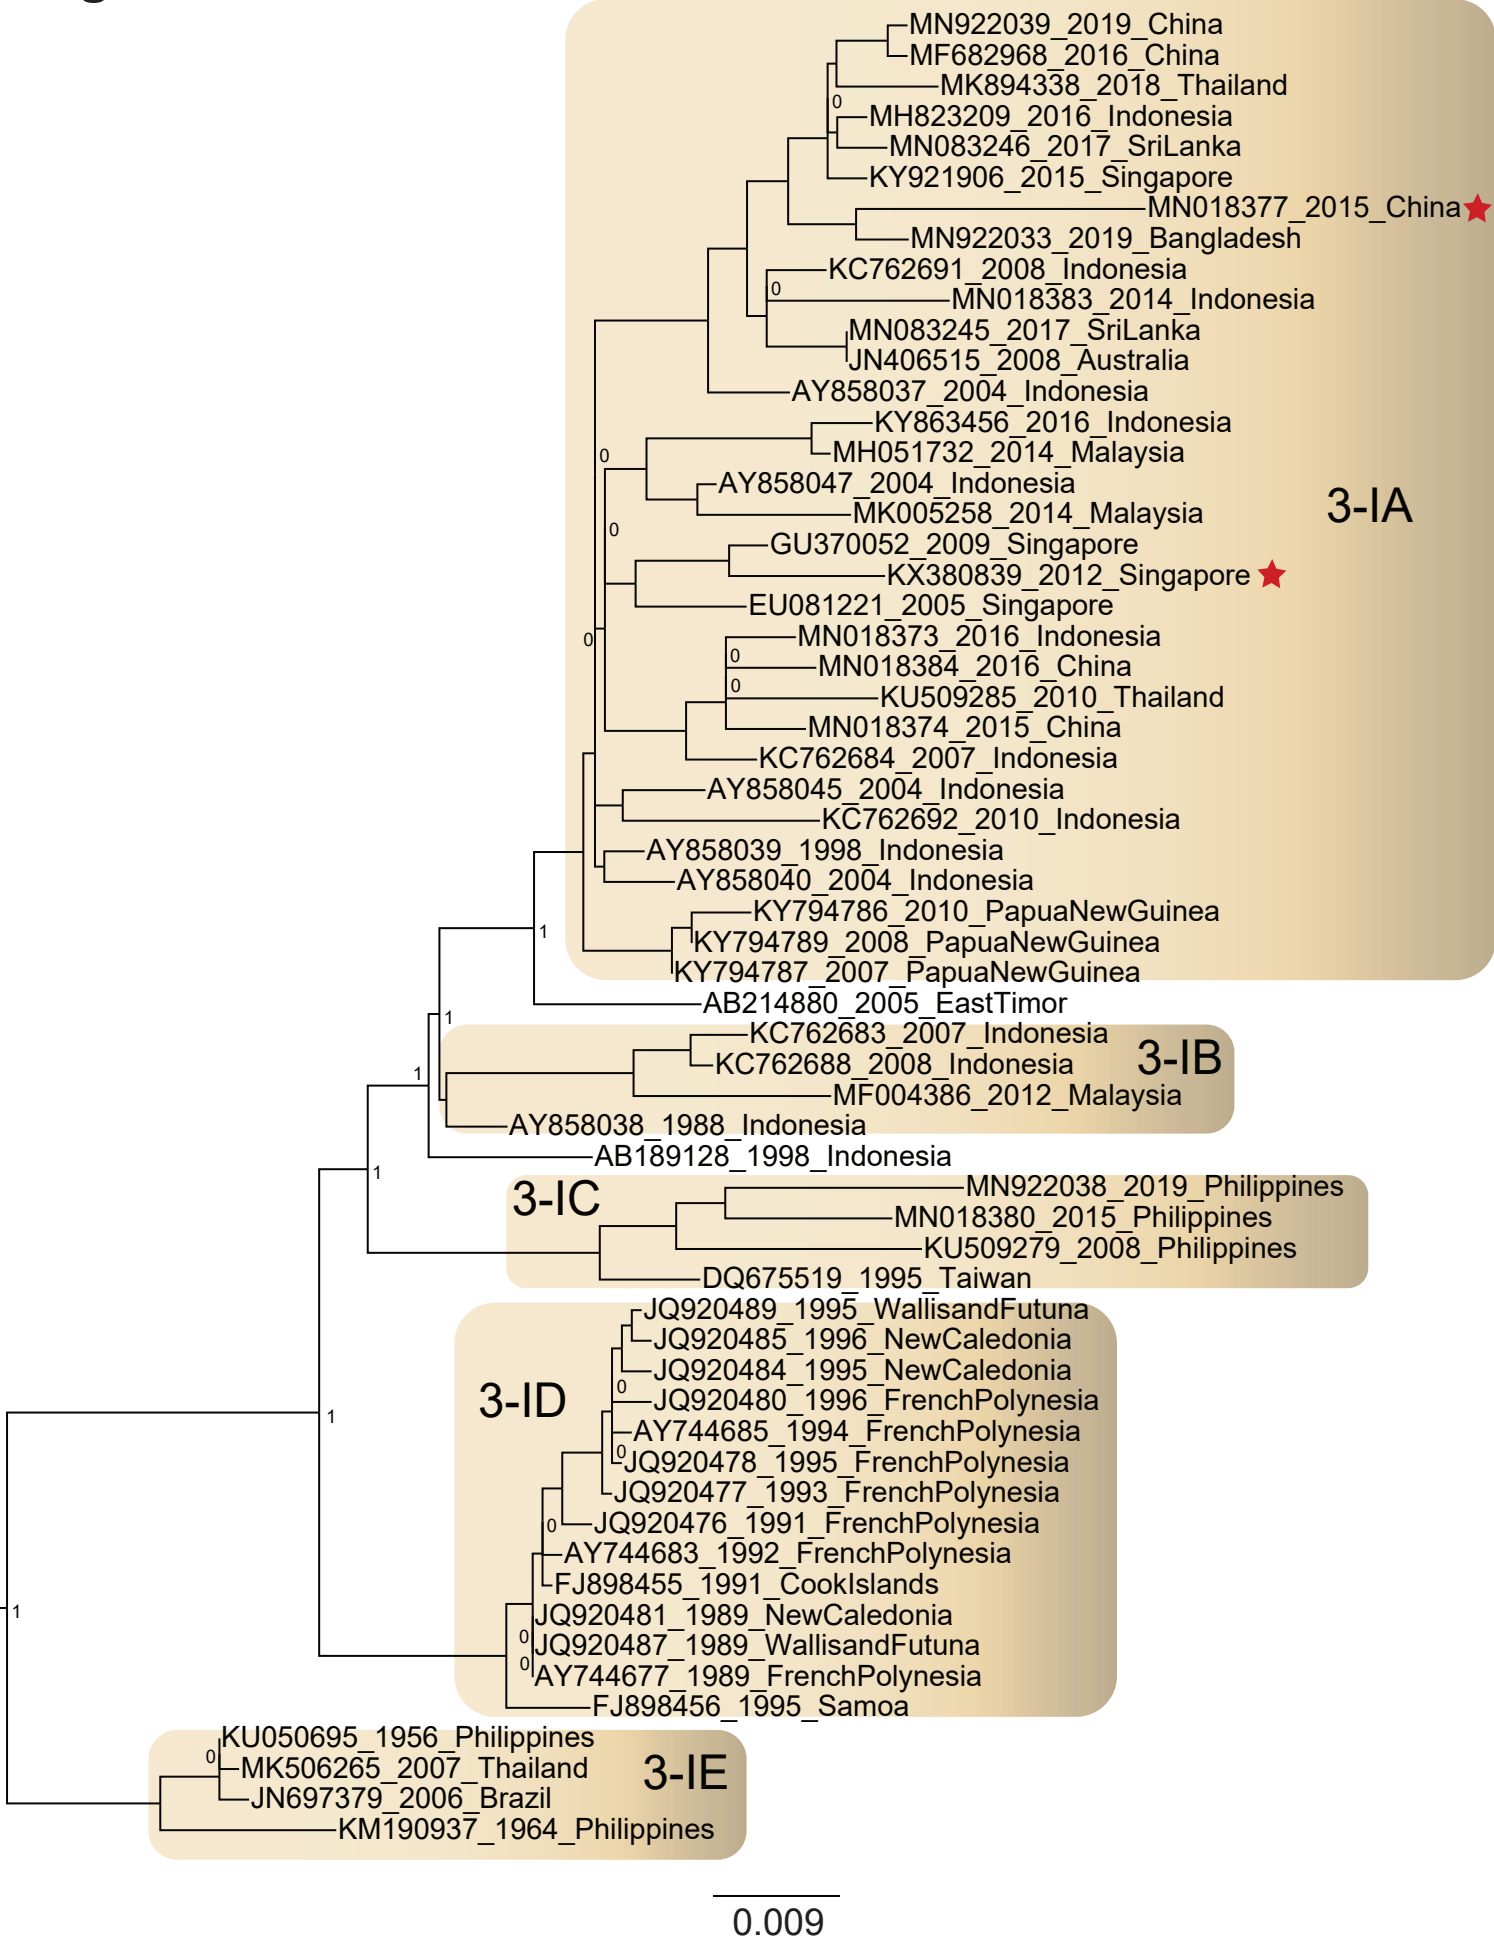



**Supplemental Figure S7: DENV4 Whole Genome ML Trees.** (a) DENV4 Whole Genome ML tree, (b) Genotype 4-II, (c) Genotypes 4-I, 4-III, and sylvatic. aLRT SH-like branch support indicated for the major branches. Support values  $>0.8$  have been eliminated in most instances for clarity. Red circles/font indicate newly sequenced isolates from the QUT Arbovirus collection. Branches under positive selection (see section 3.2.2) are indicated by a red star.

Figure S7a

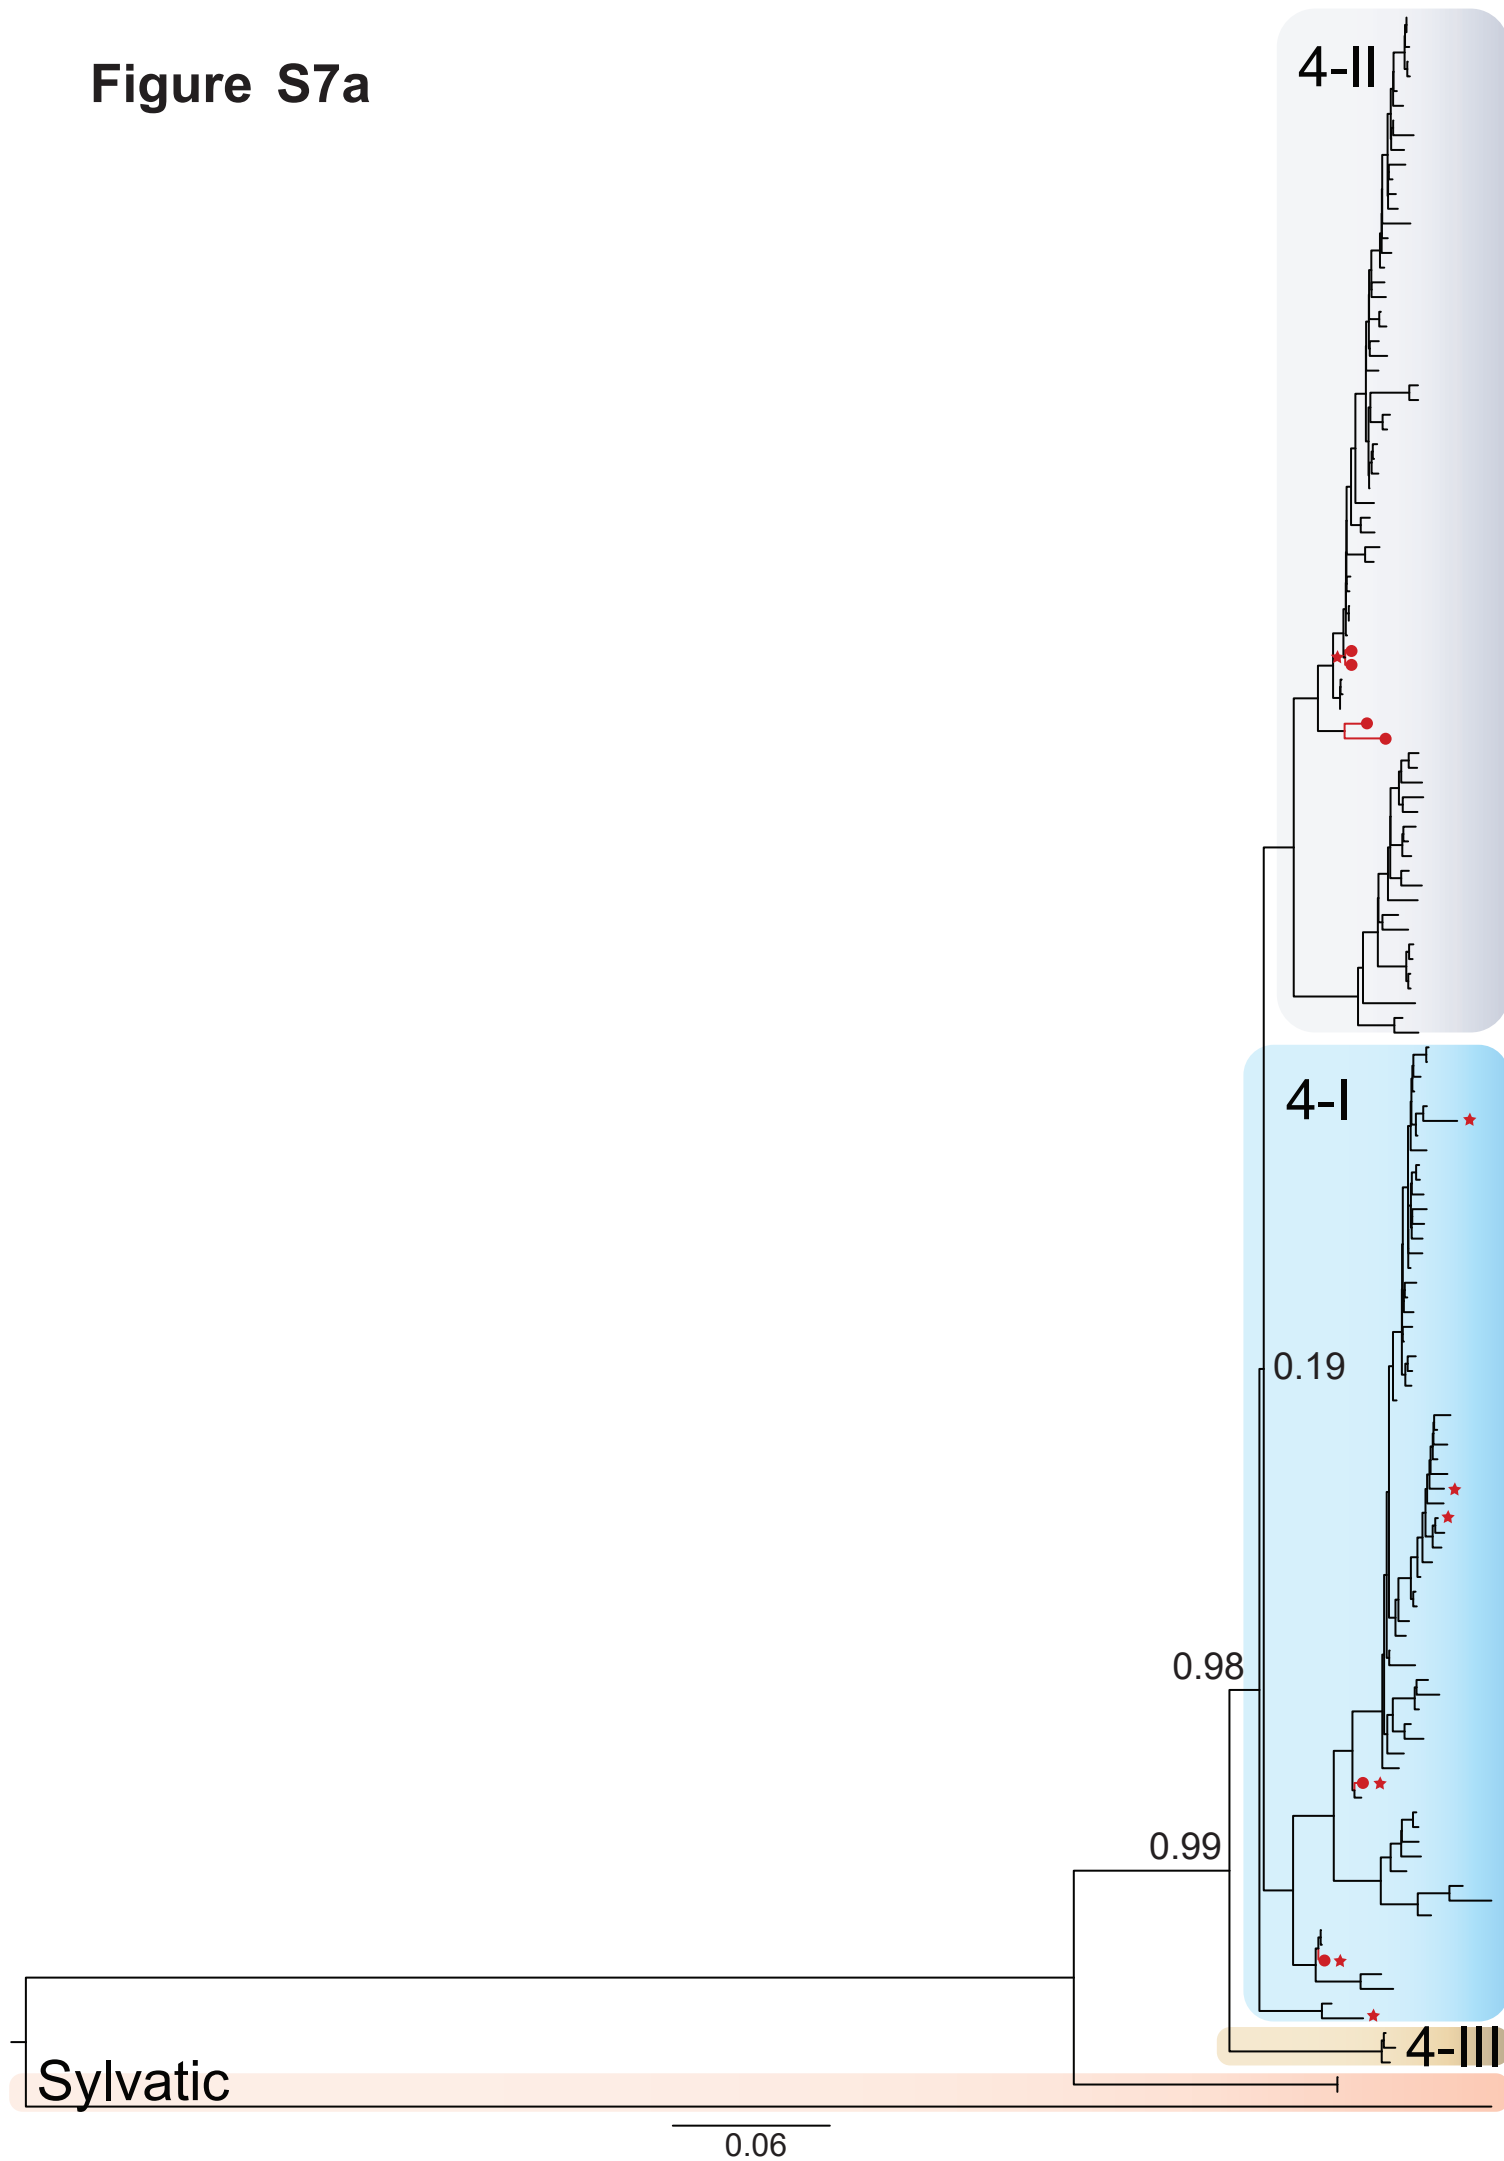

Figure S7b

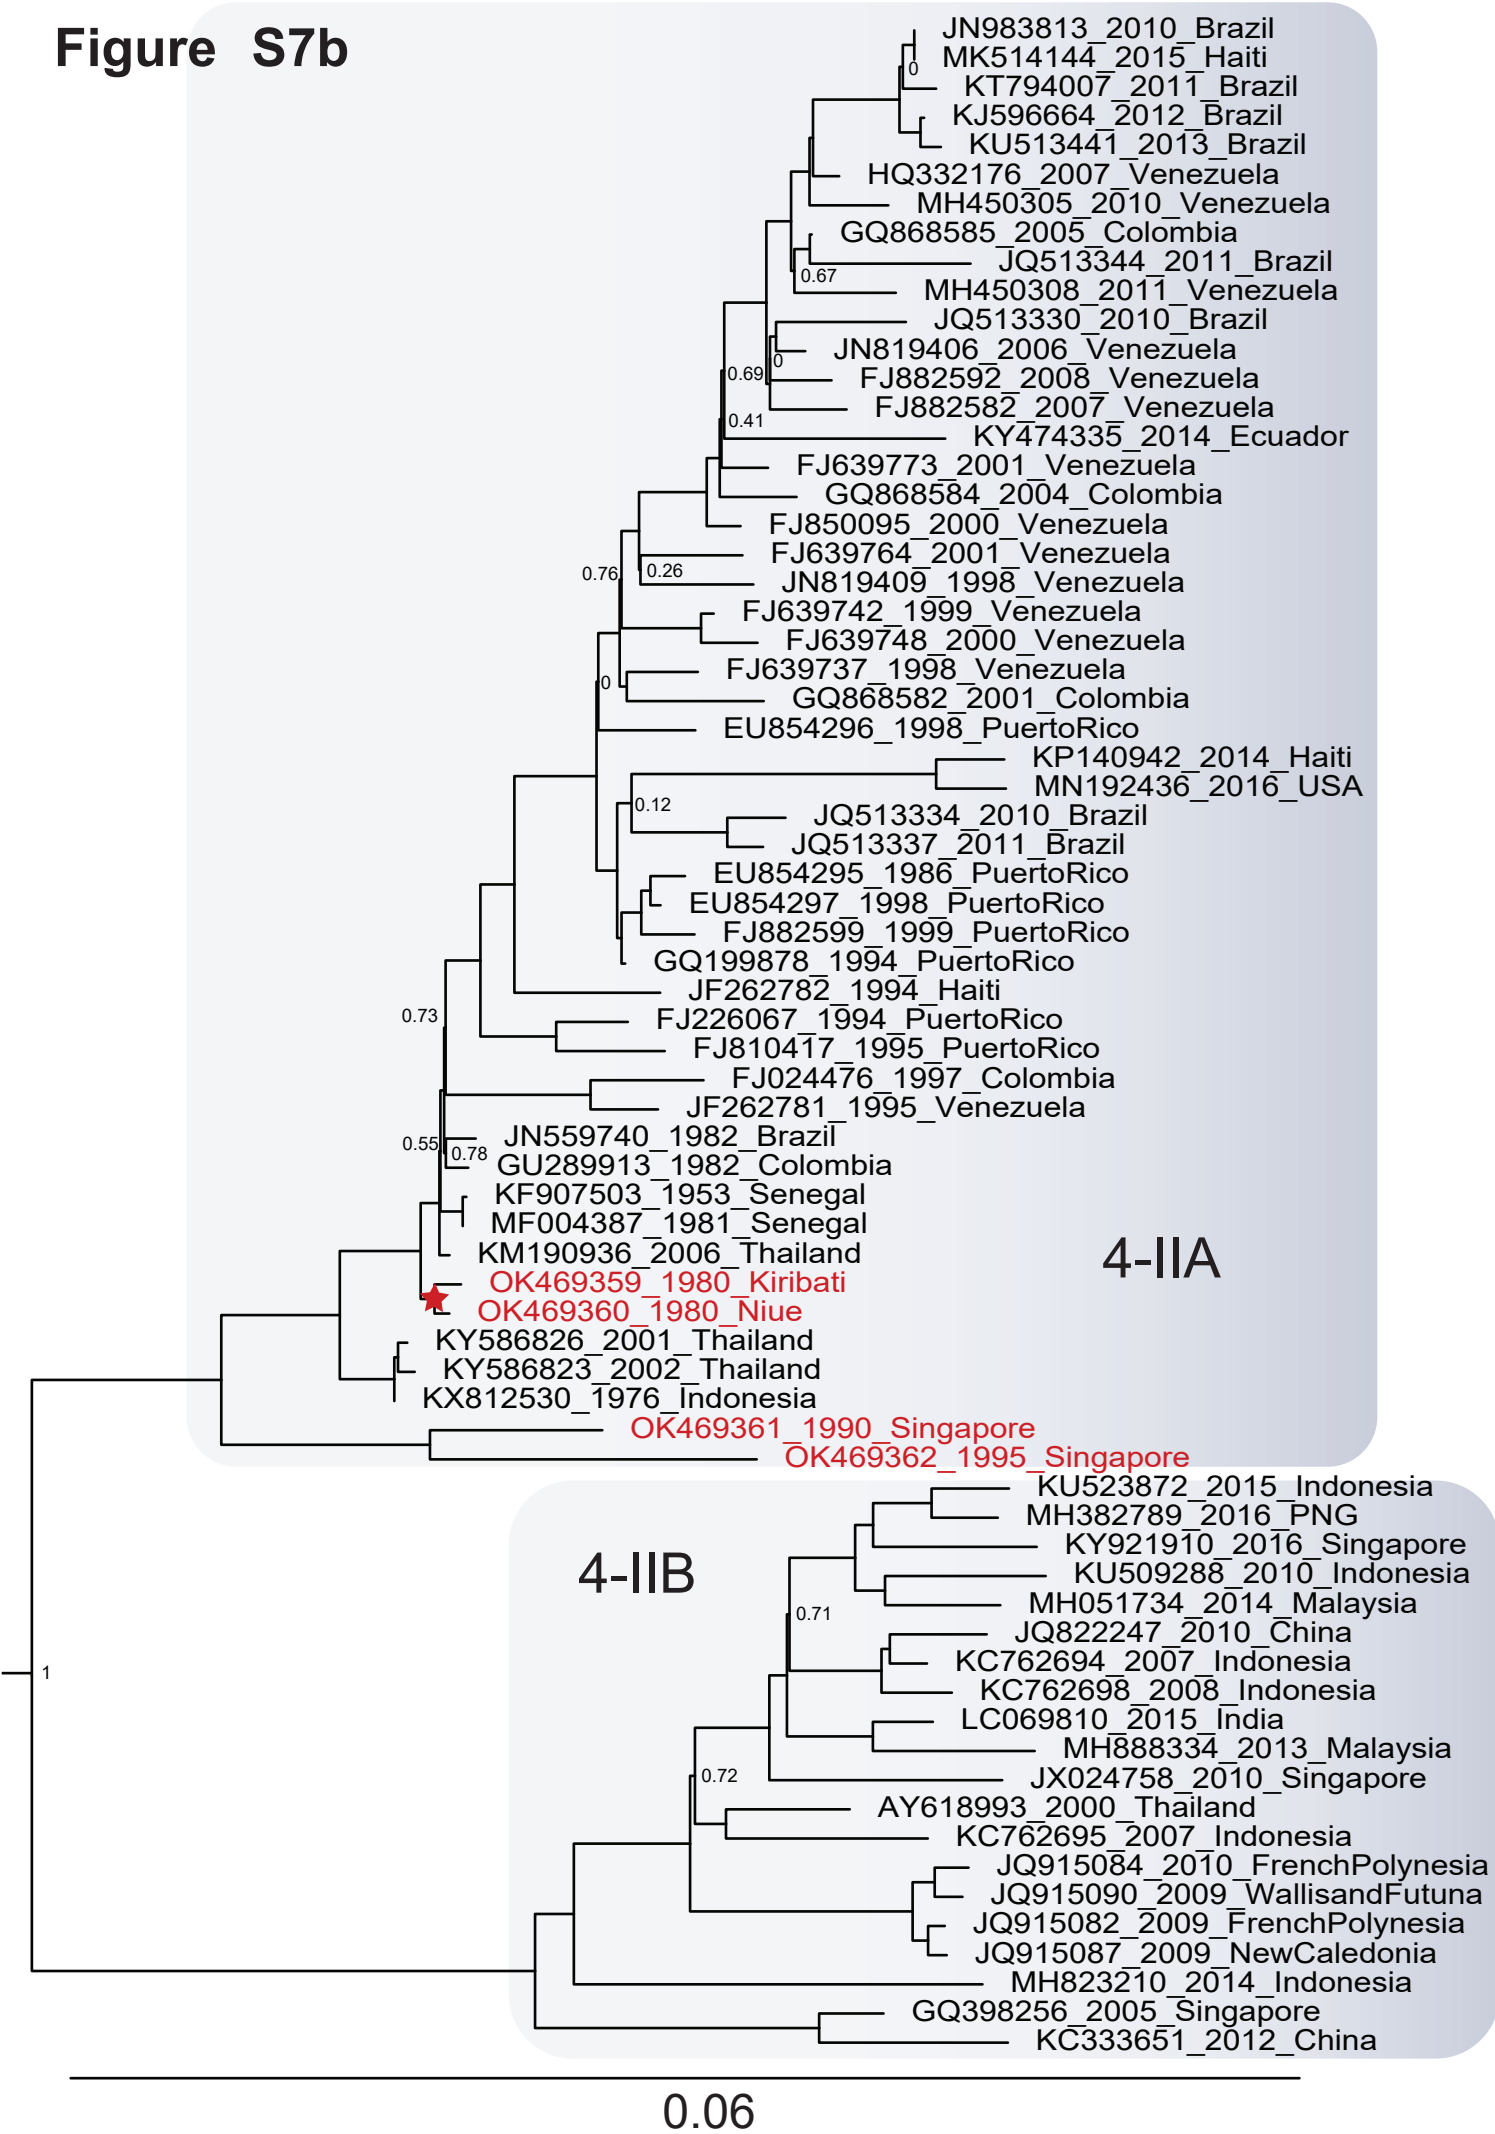

Figure S7c

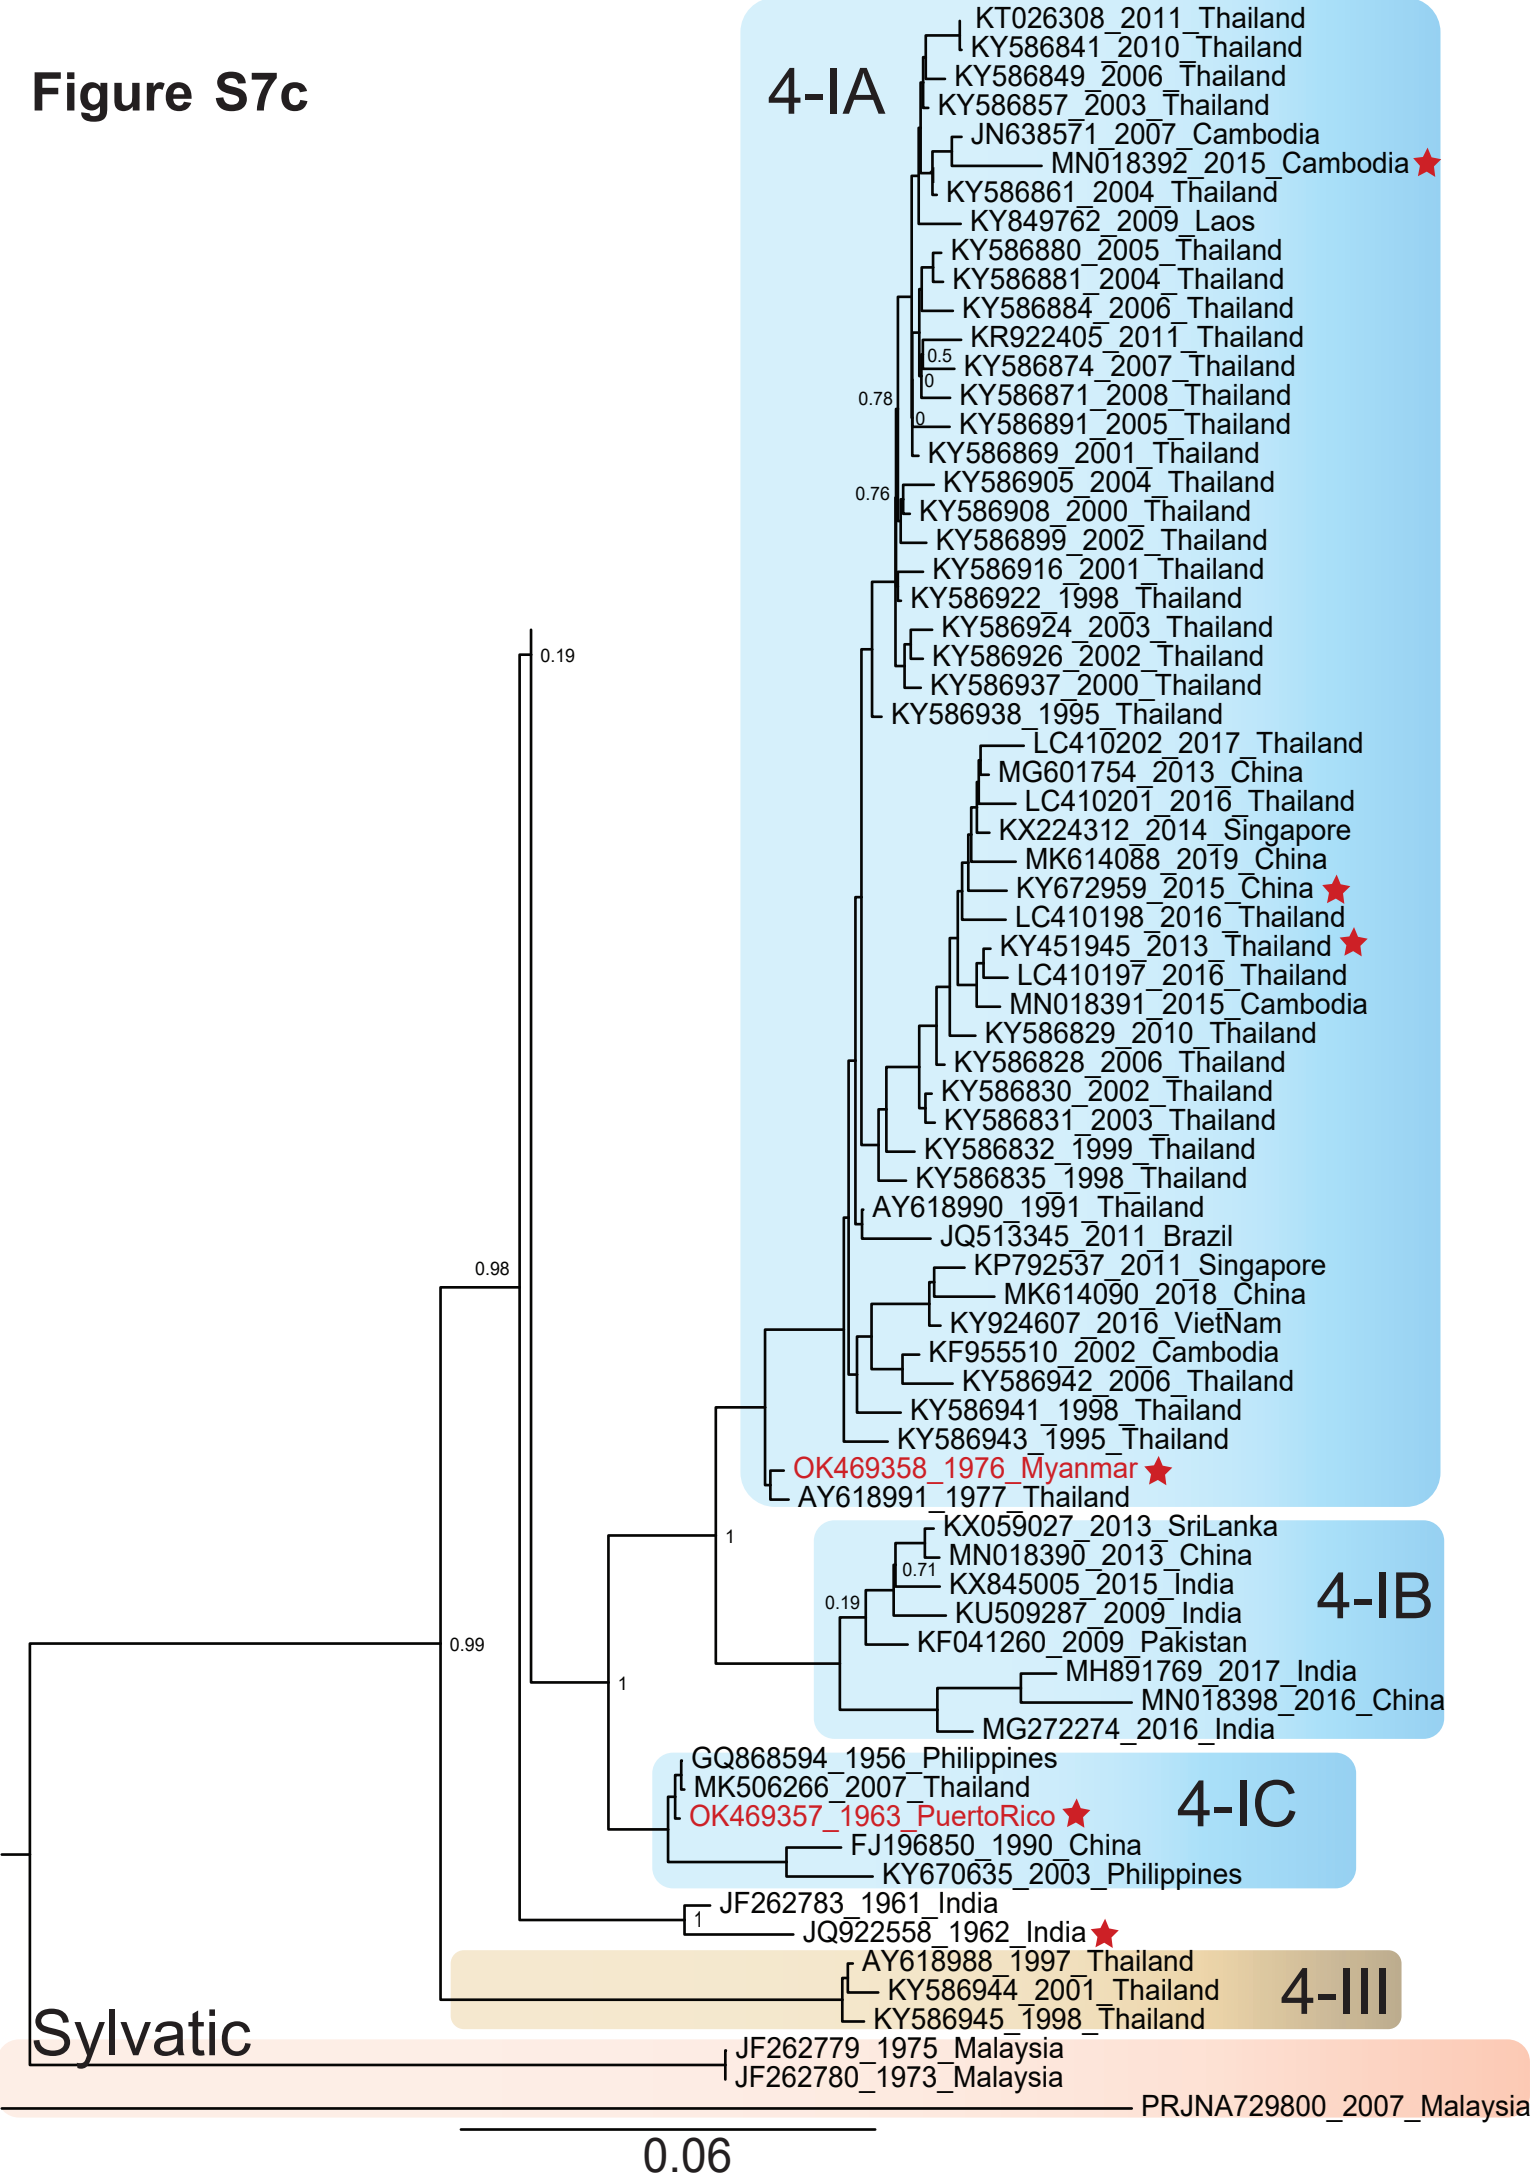

**Supplemental Figure S8: DENV4 E Gene ML Trees.** (a) DENV4 E gene ML tree, (b) Genotype 4-II, (c) Genotypes 4-I, 4-III, and sylvatic. aLRT SH-like branch support indicated for the major branches. Support values >0.8 have been eliminated in most instances for clarity. Red circles/font indicate newly sequenced isolates from the QUT Arbovirus collection. Branches under positive selection (see section 3.2.2) are indicated by a red star.

Figure S8a

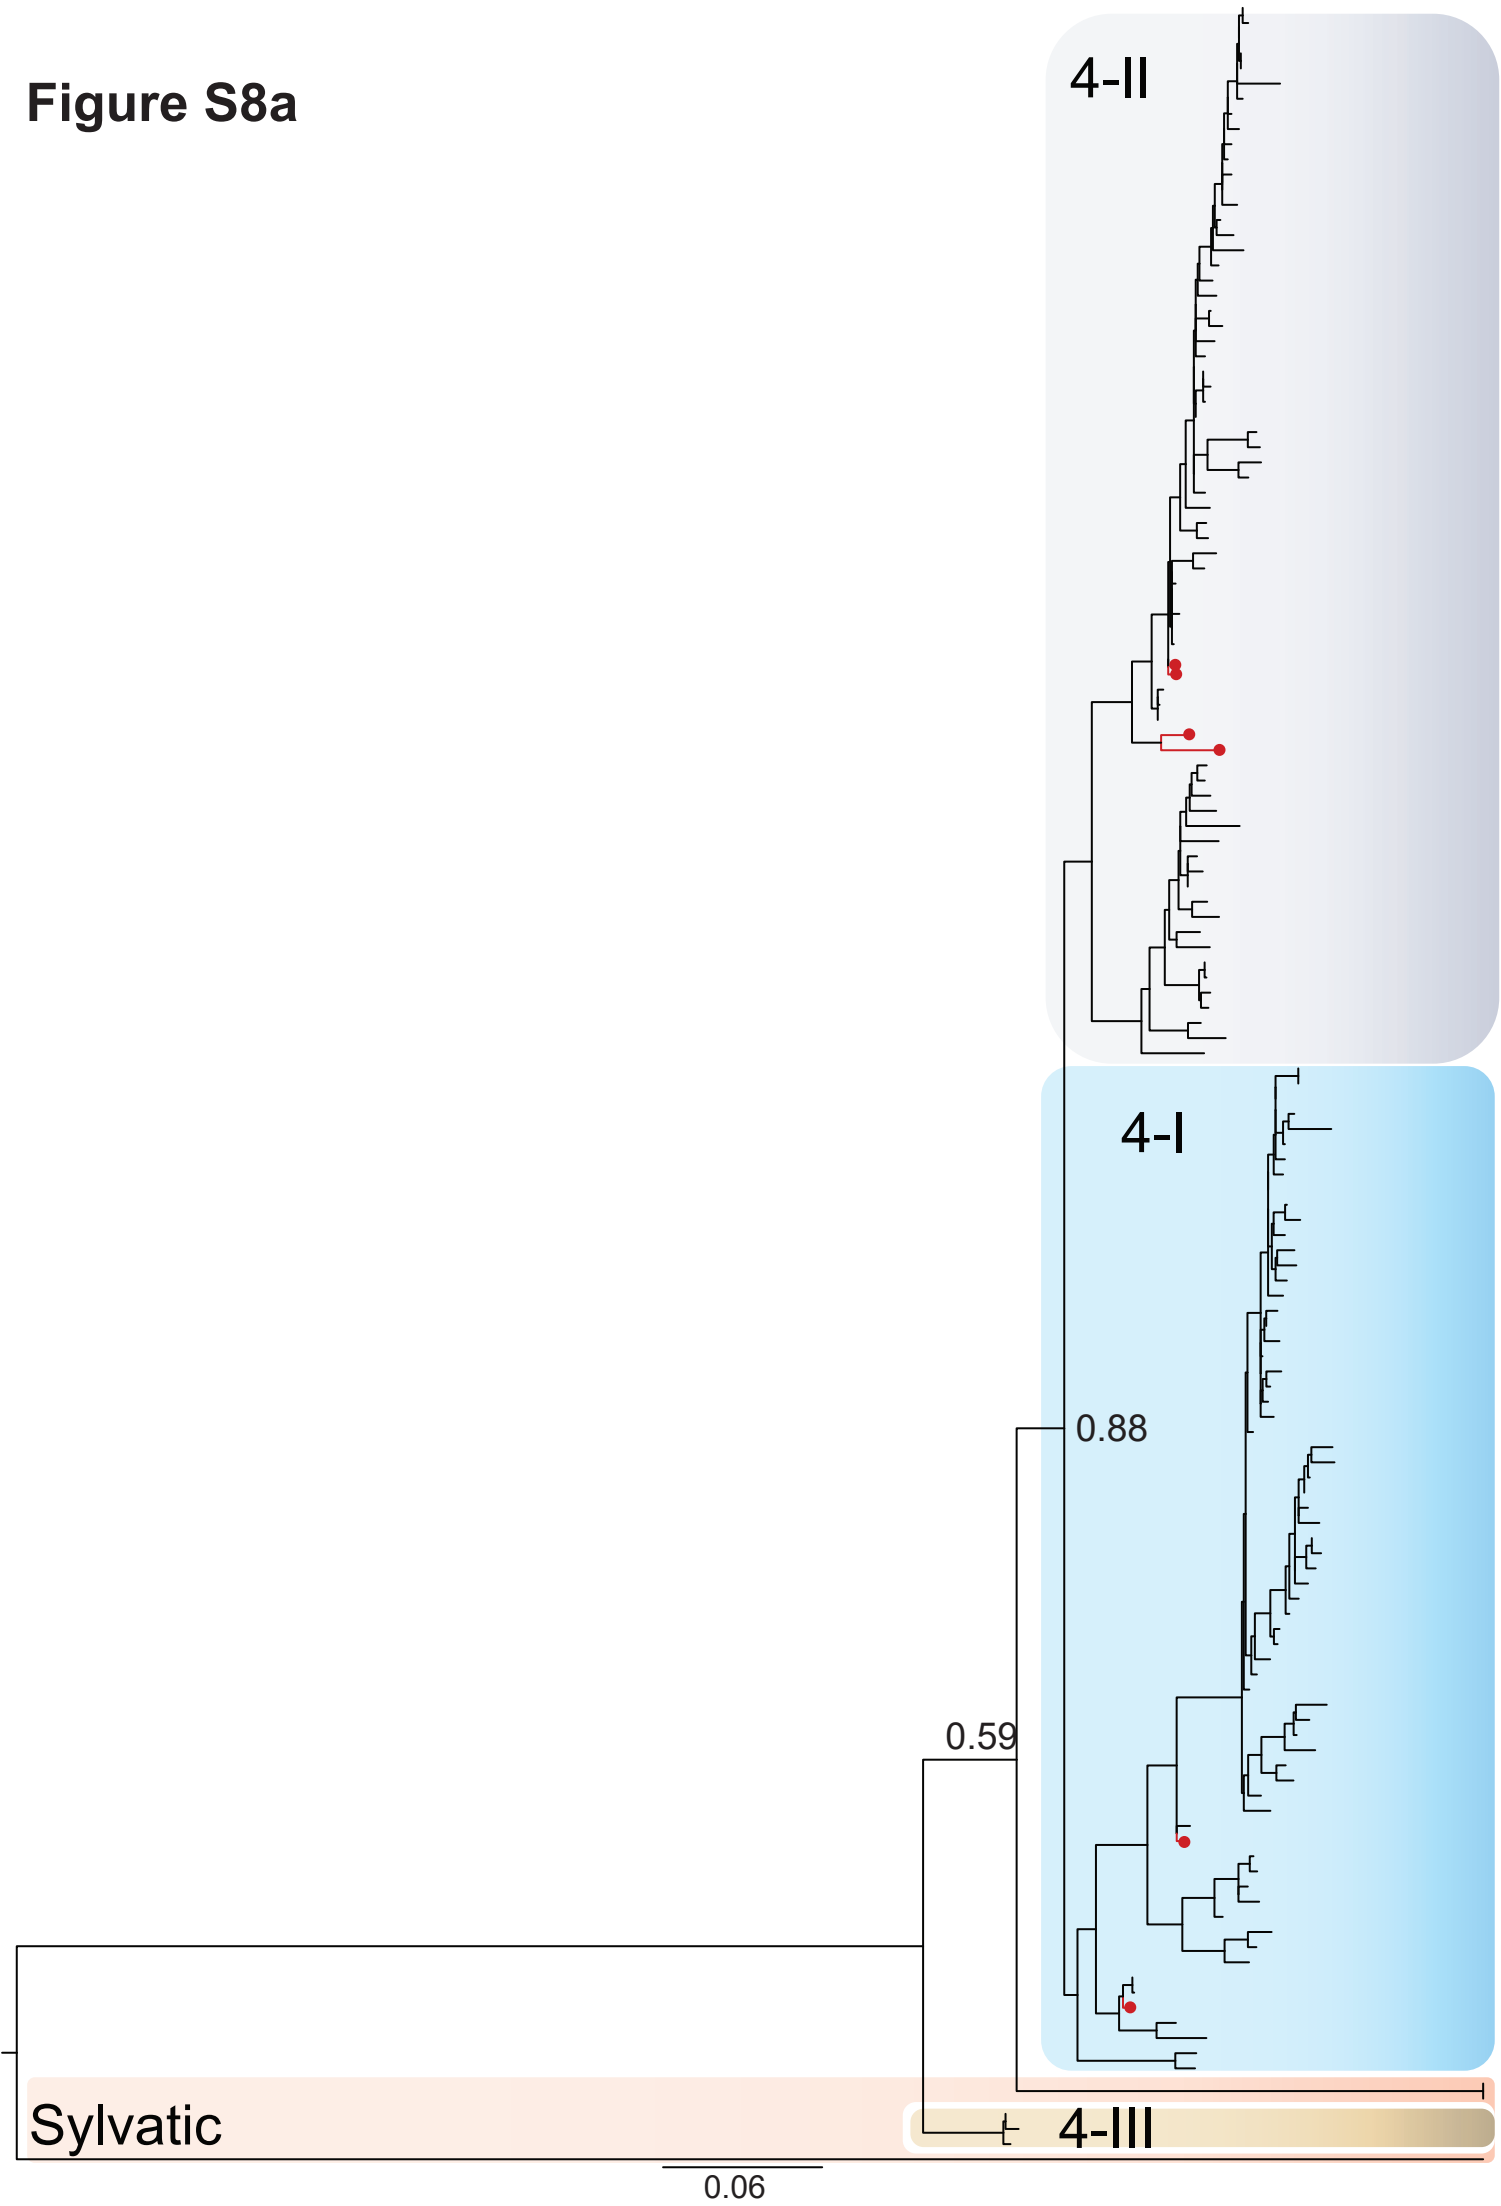

Figure S8b

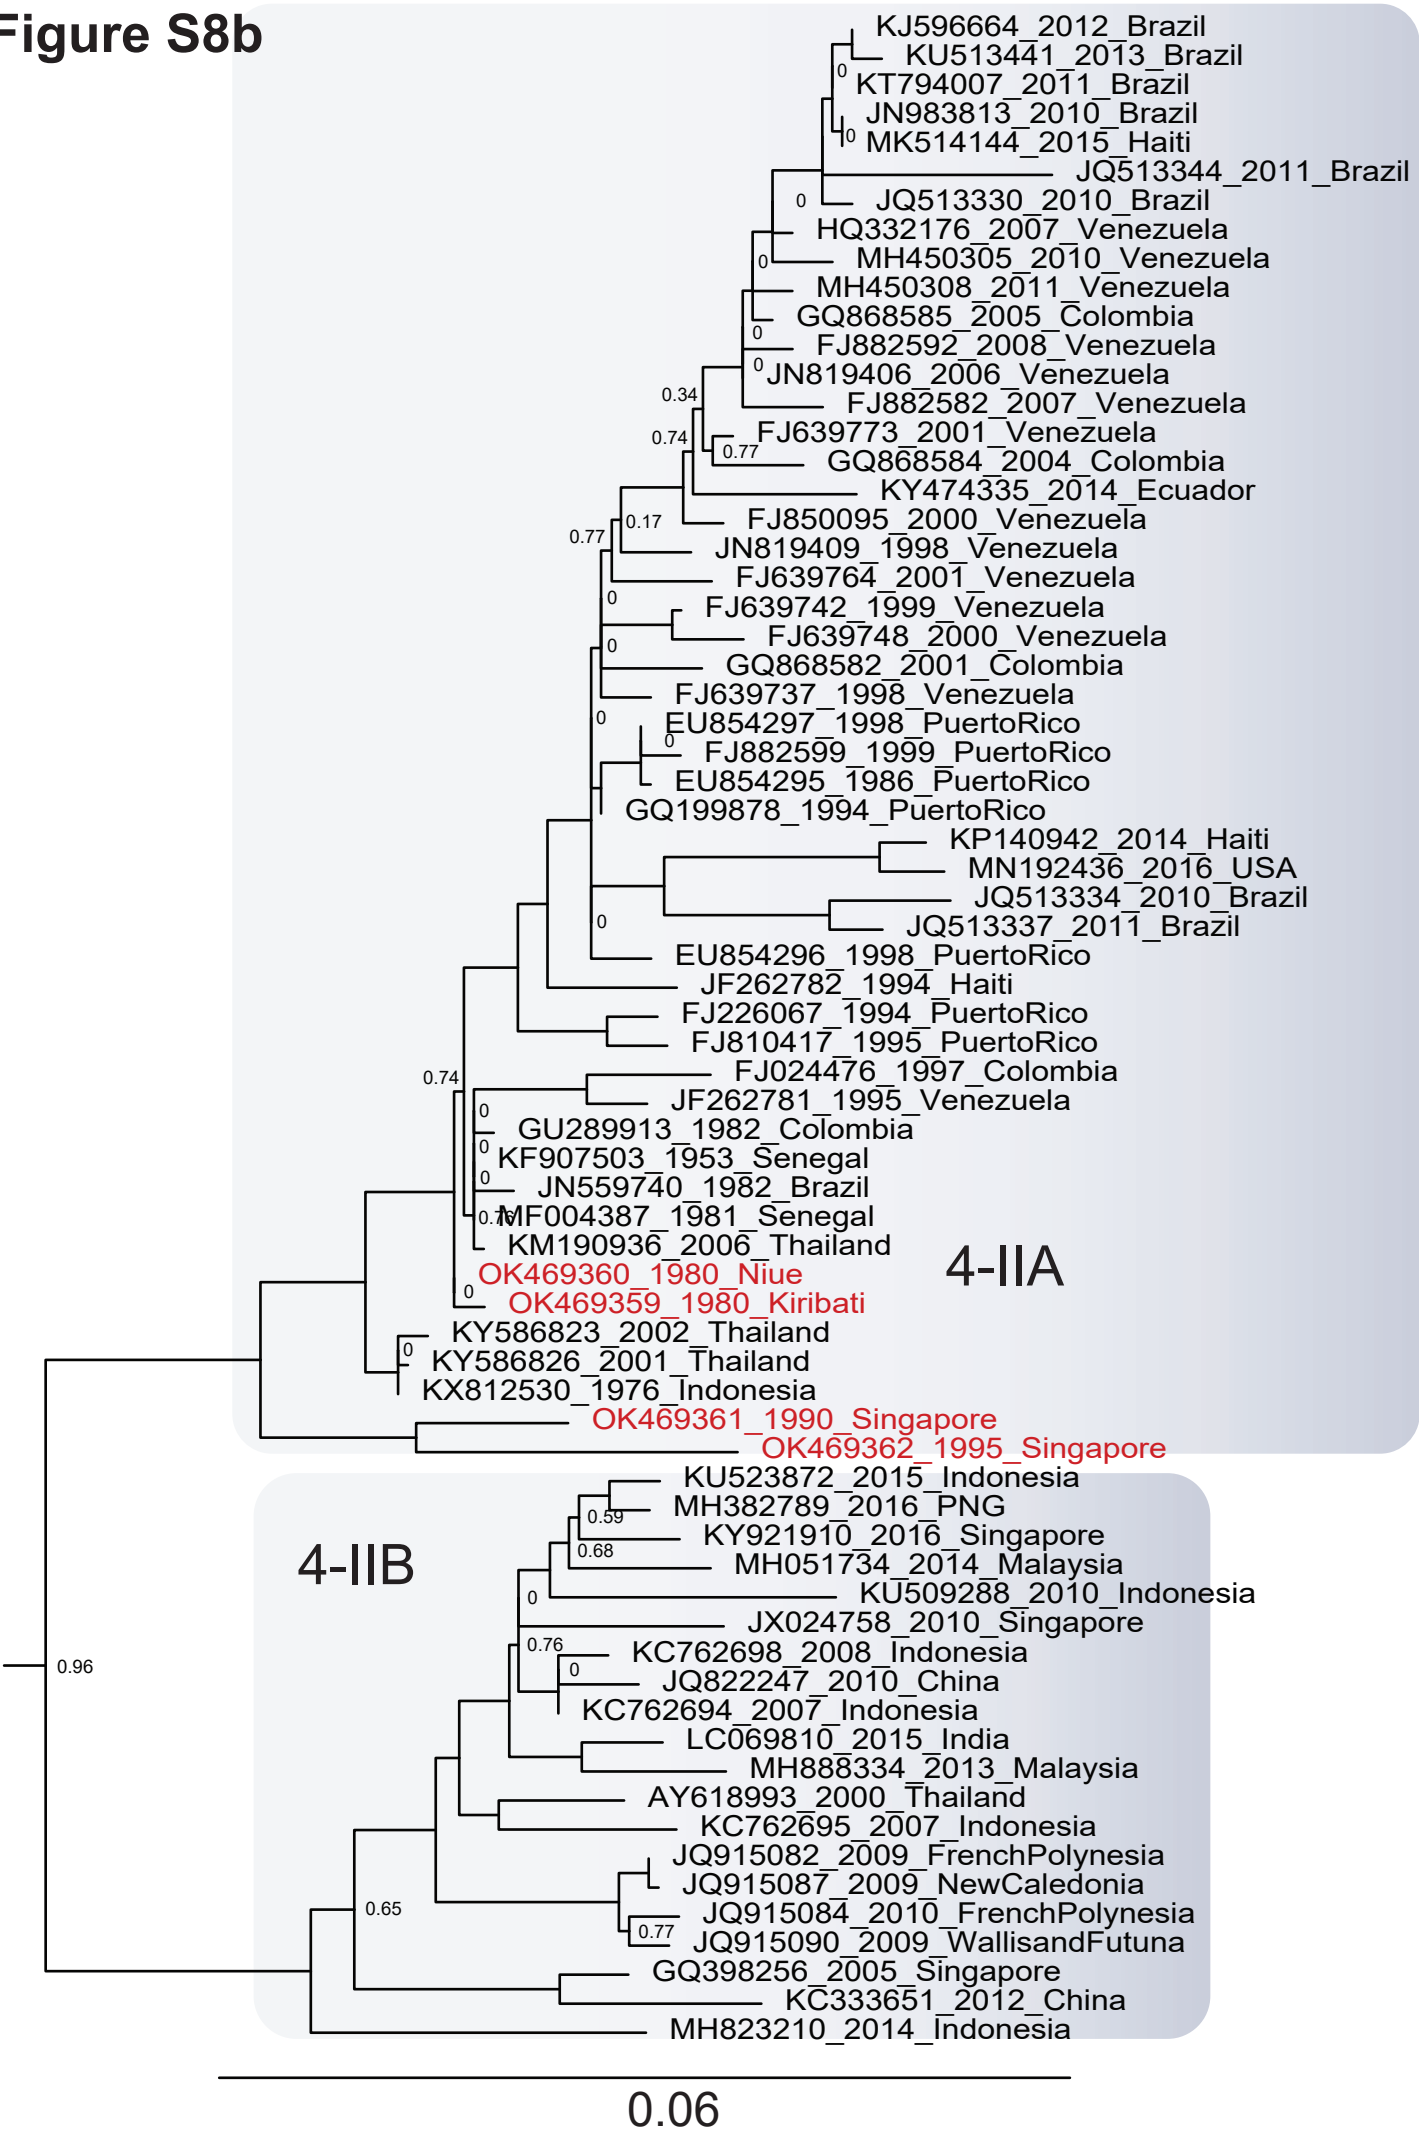

Figure S8c

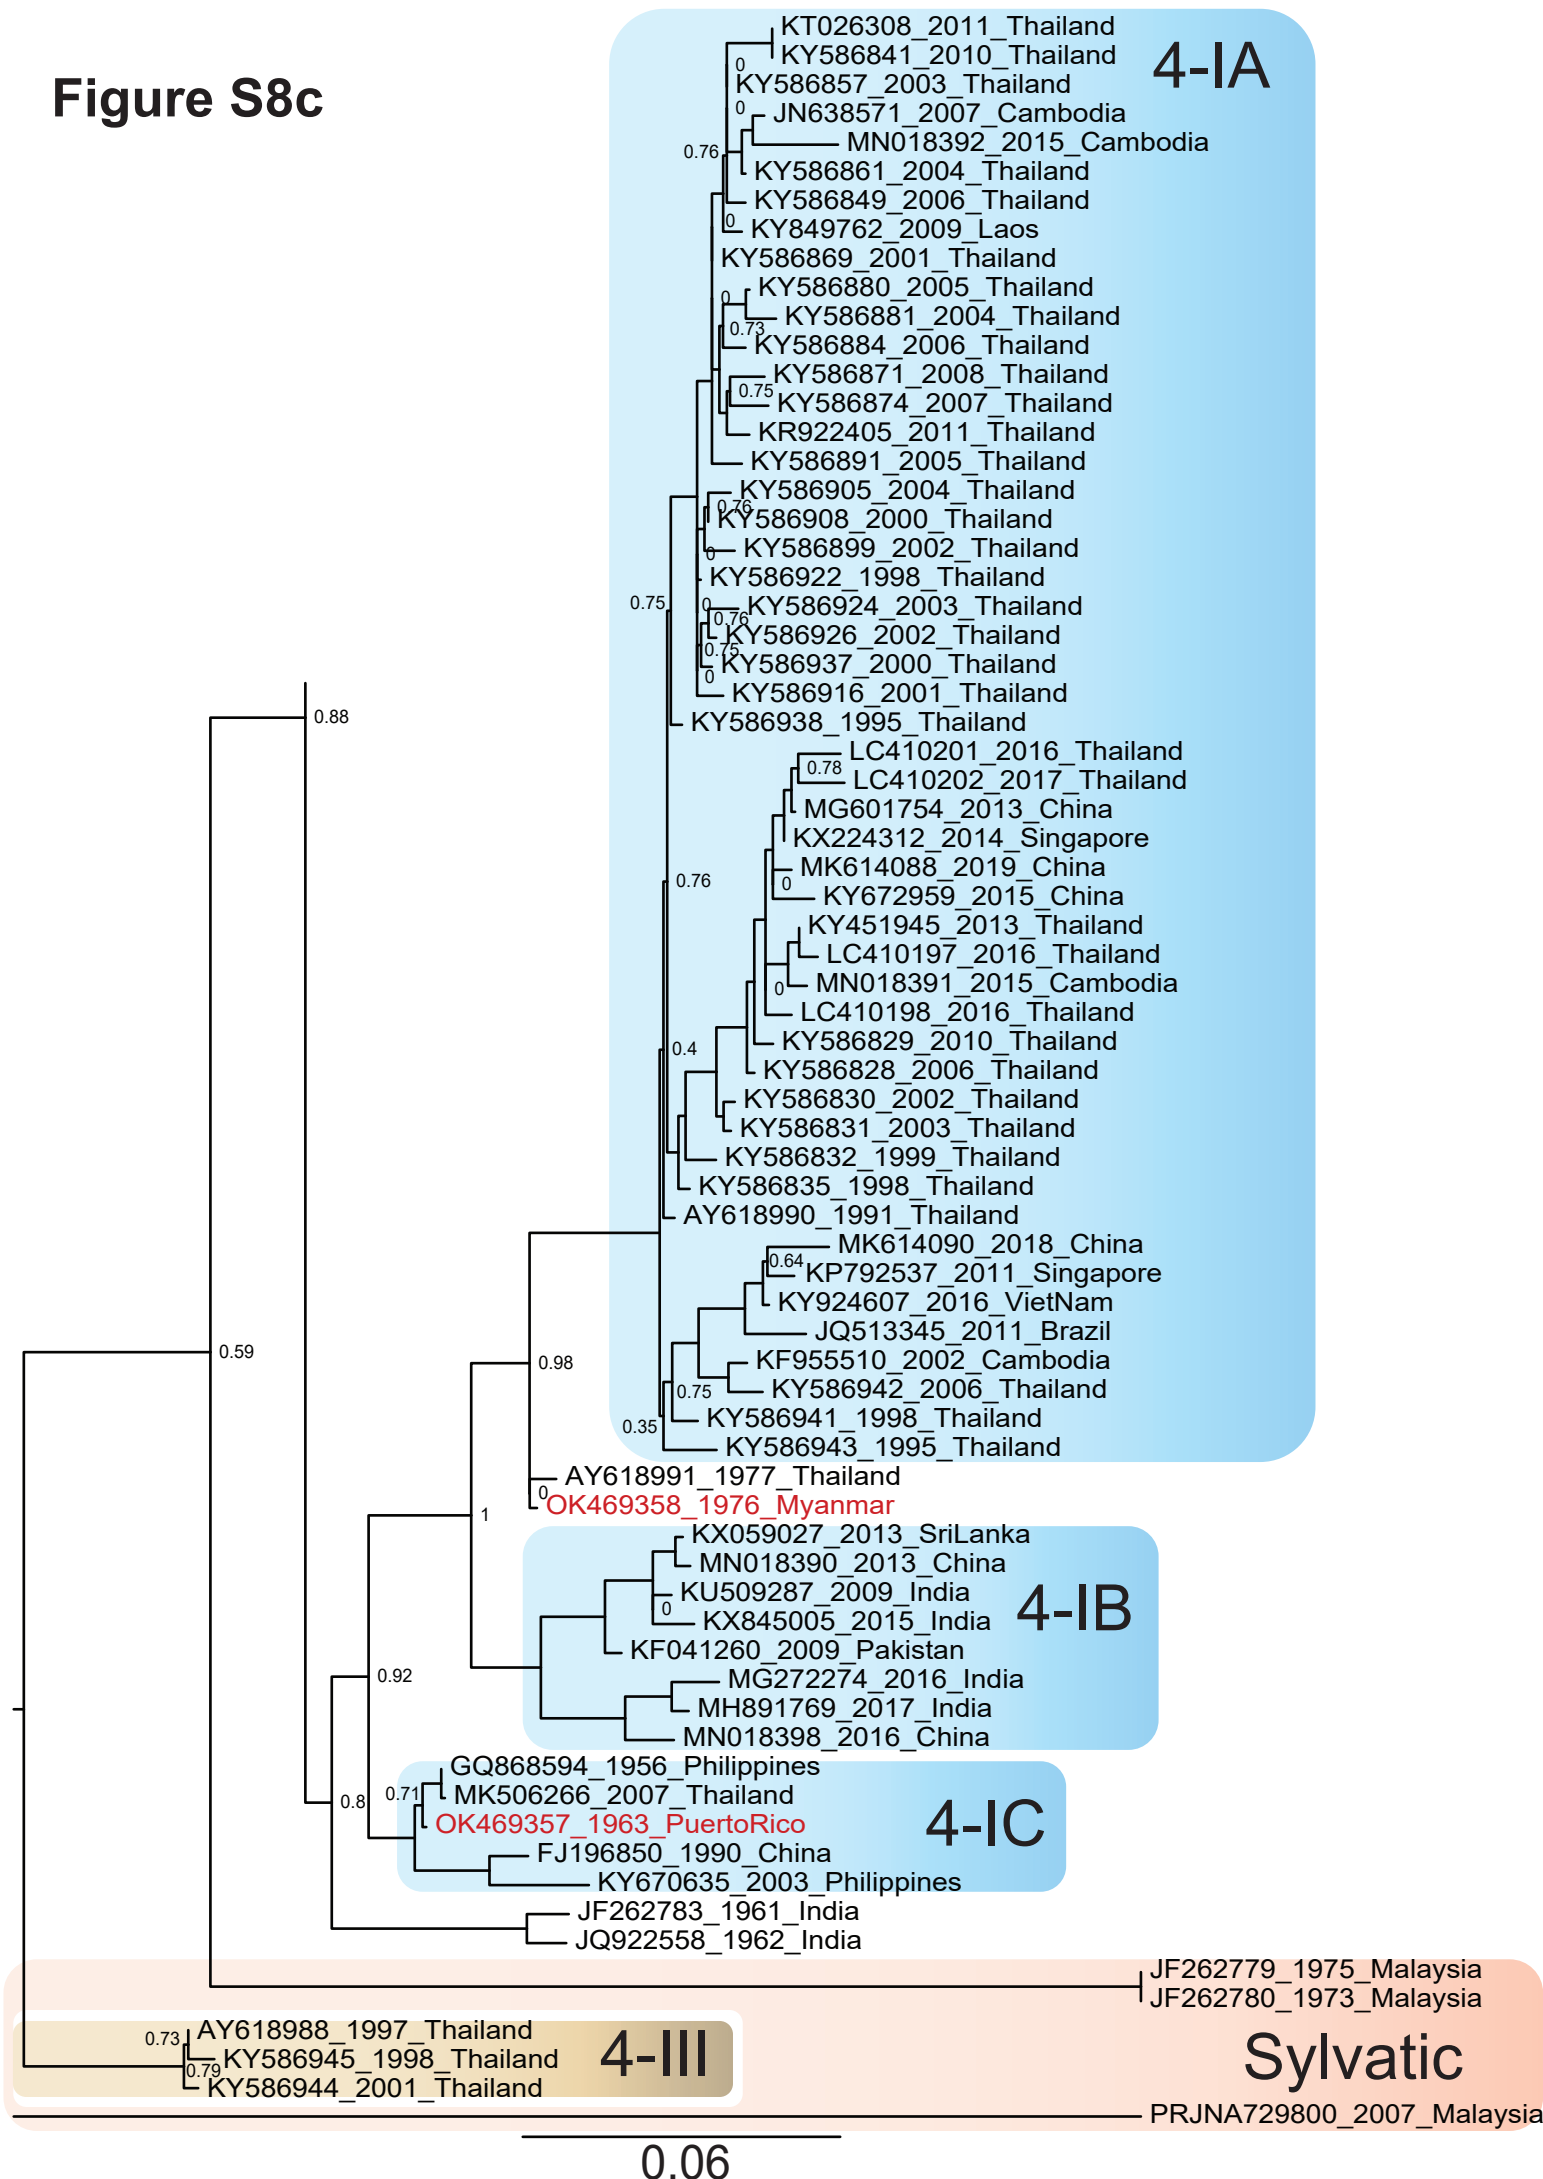



**Supplemental Figure S9: DENV1 Whole Genome Genotypes MCMC Trees.** (a) Genotype 1-I, (b) Genotype 1-IV, (c) Genotypes 1-V (isolates incorrectly classified as 1-III indicated by arrows) and sylvatic. Posterior node support indicated for the major branches. Support values >0.8 have been eliminated in most instances for clarity. Red font indicates newly sequenced isolates from the QUT Arbovirus collection. Branches under positive selection (see section 3.2.2) are indicated by a red star. Scale axis is representative of calendar years.

### Figure S9a

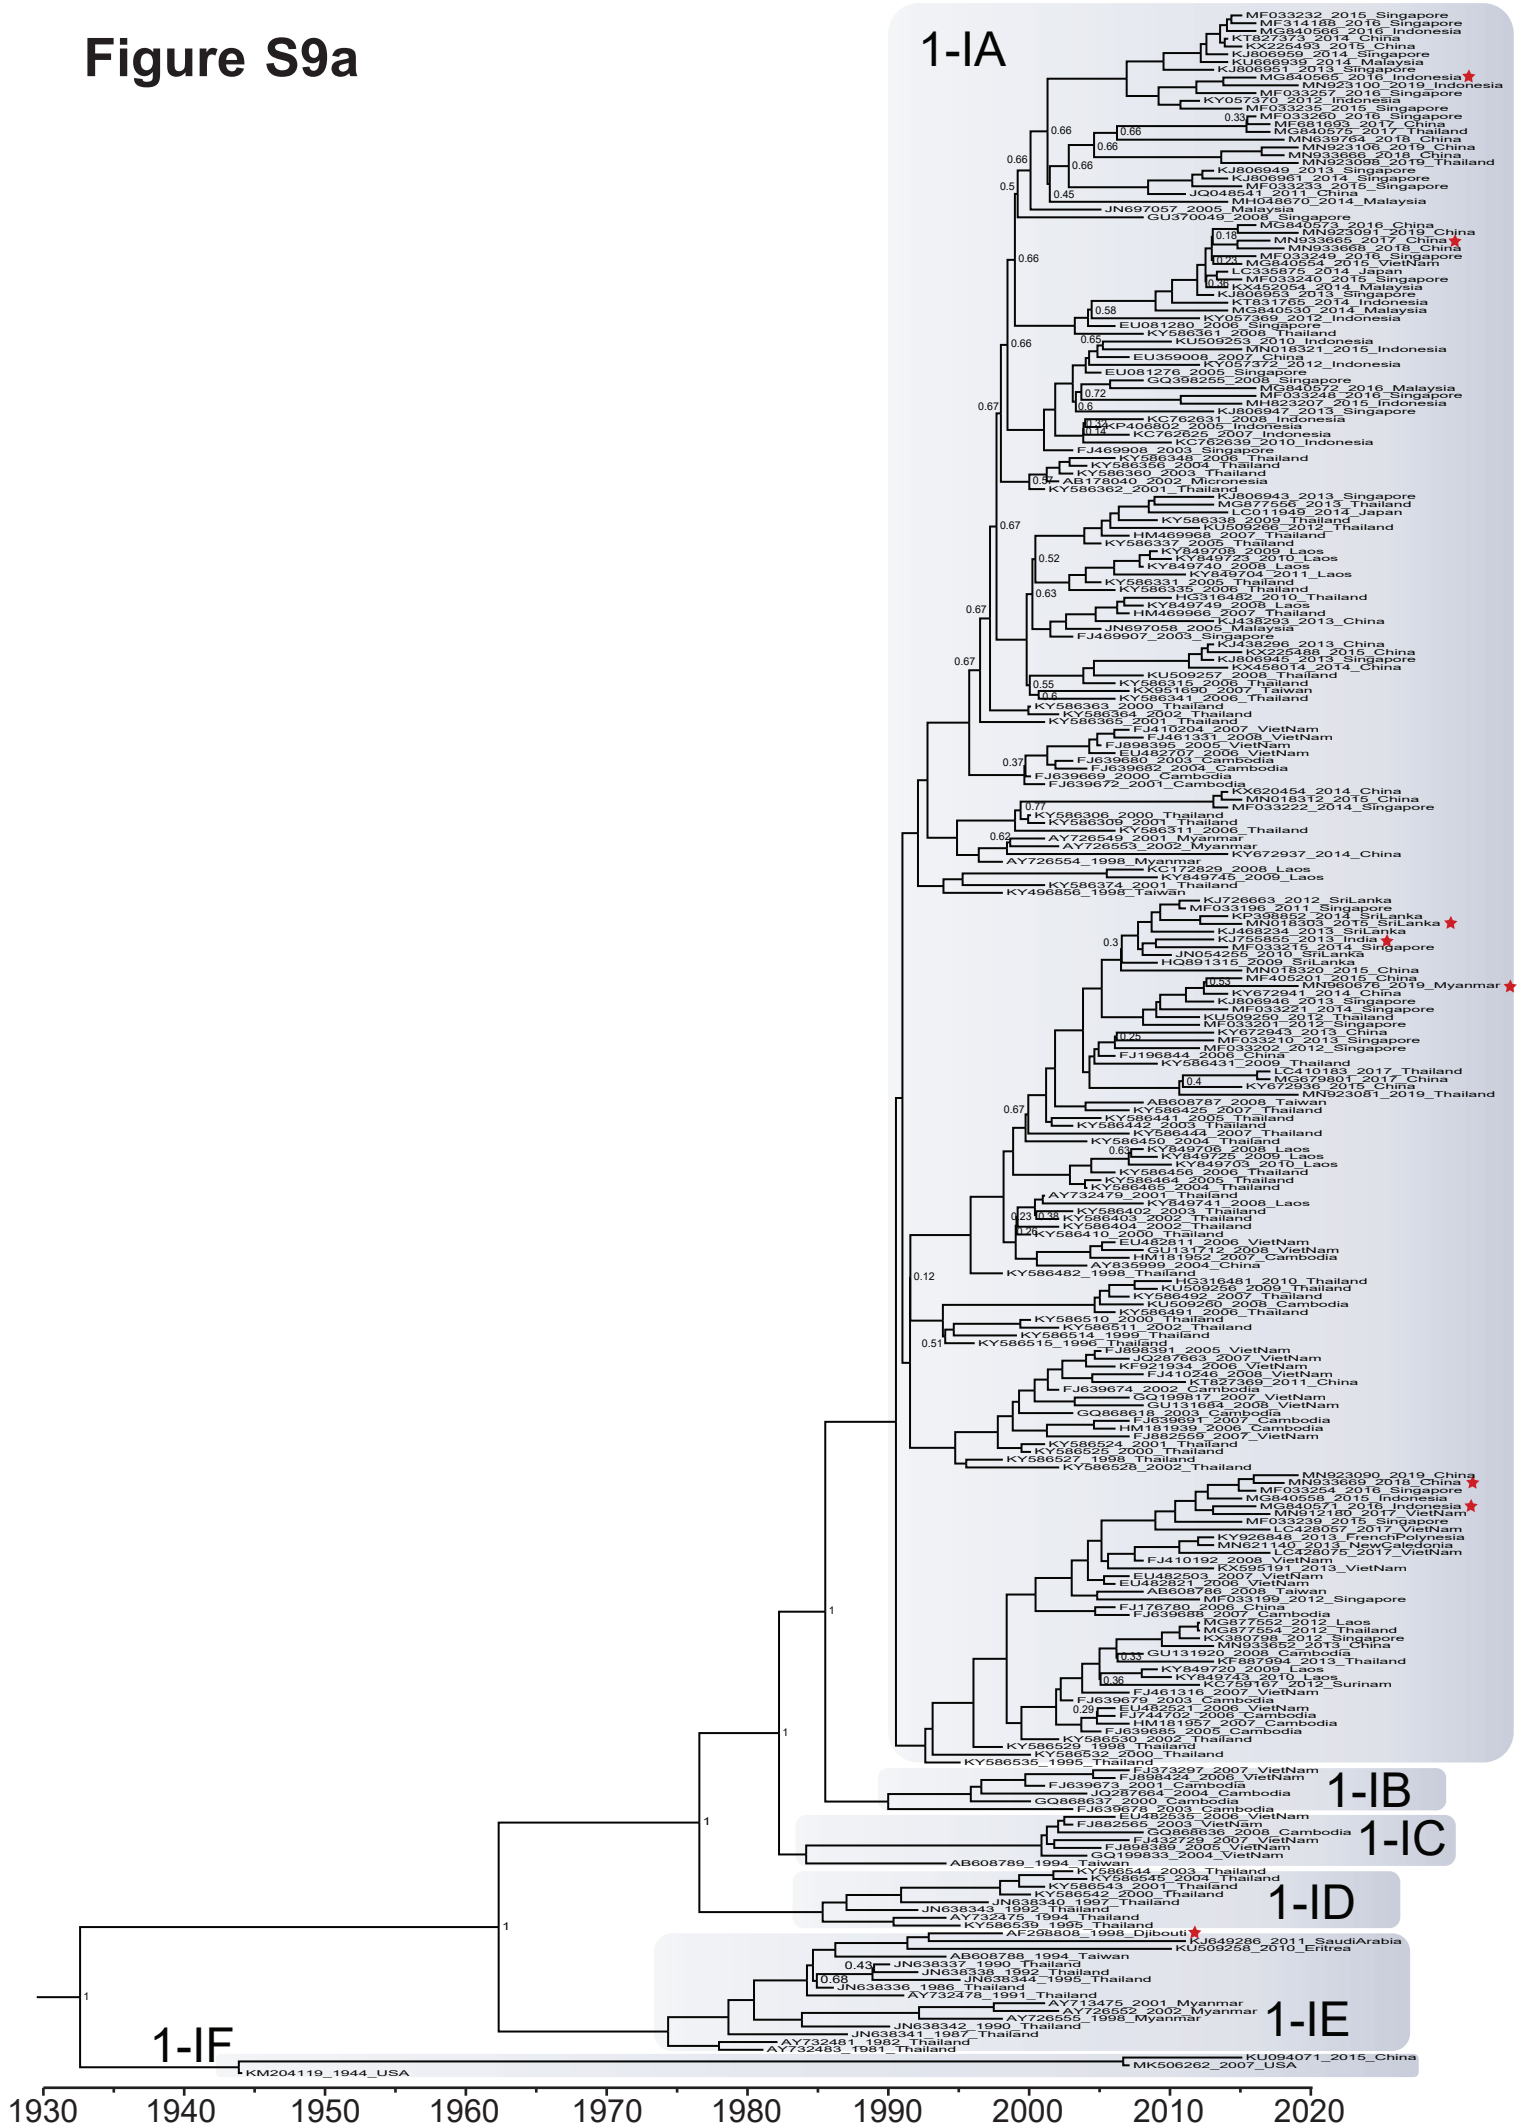

Figure S9b

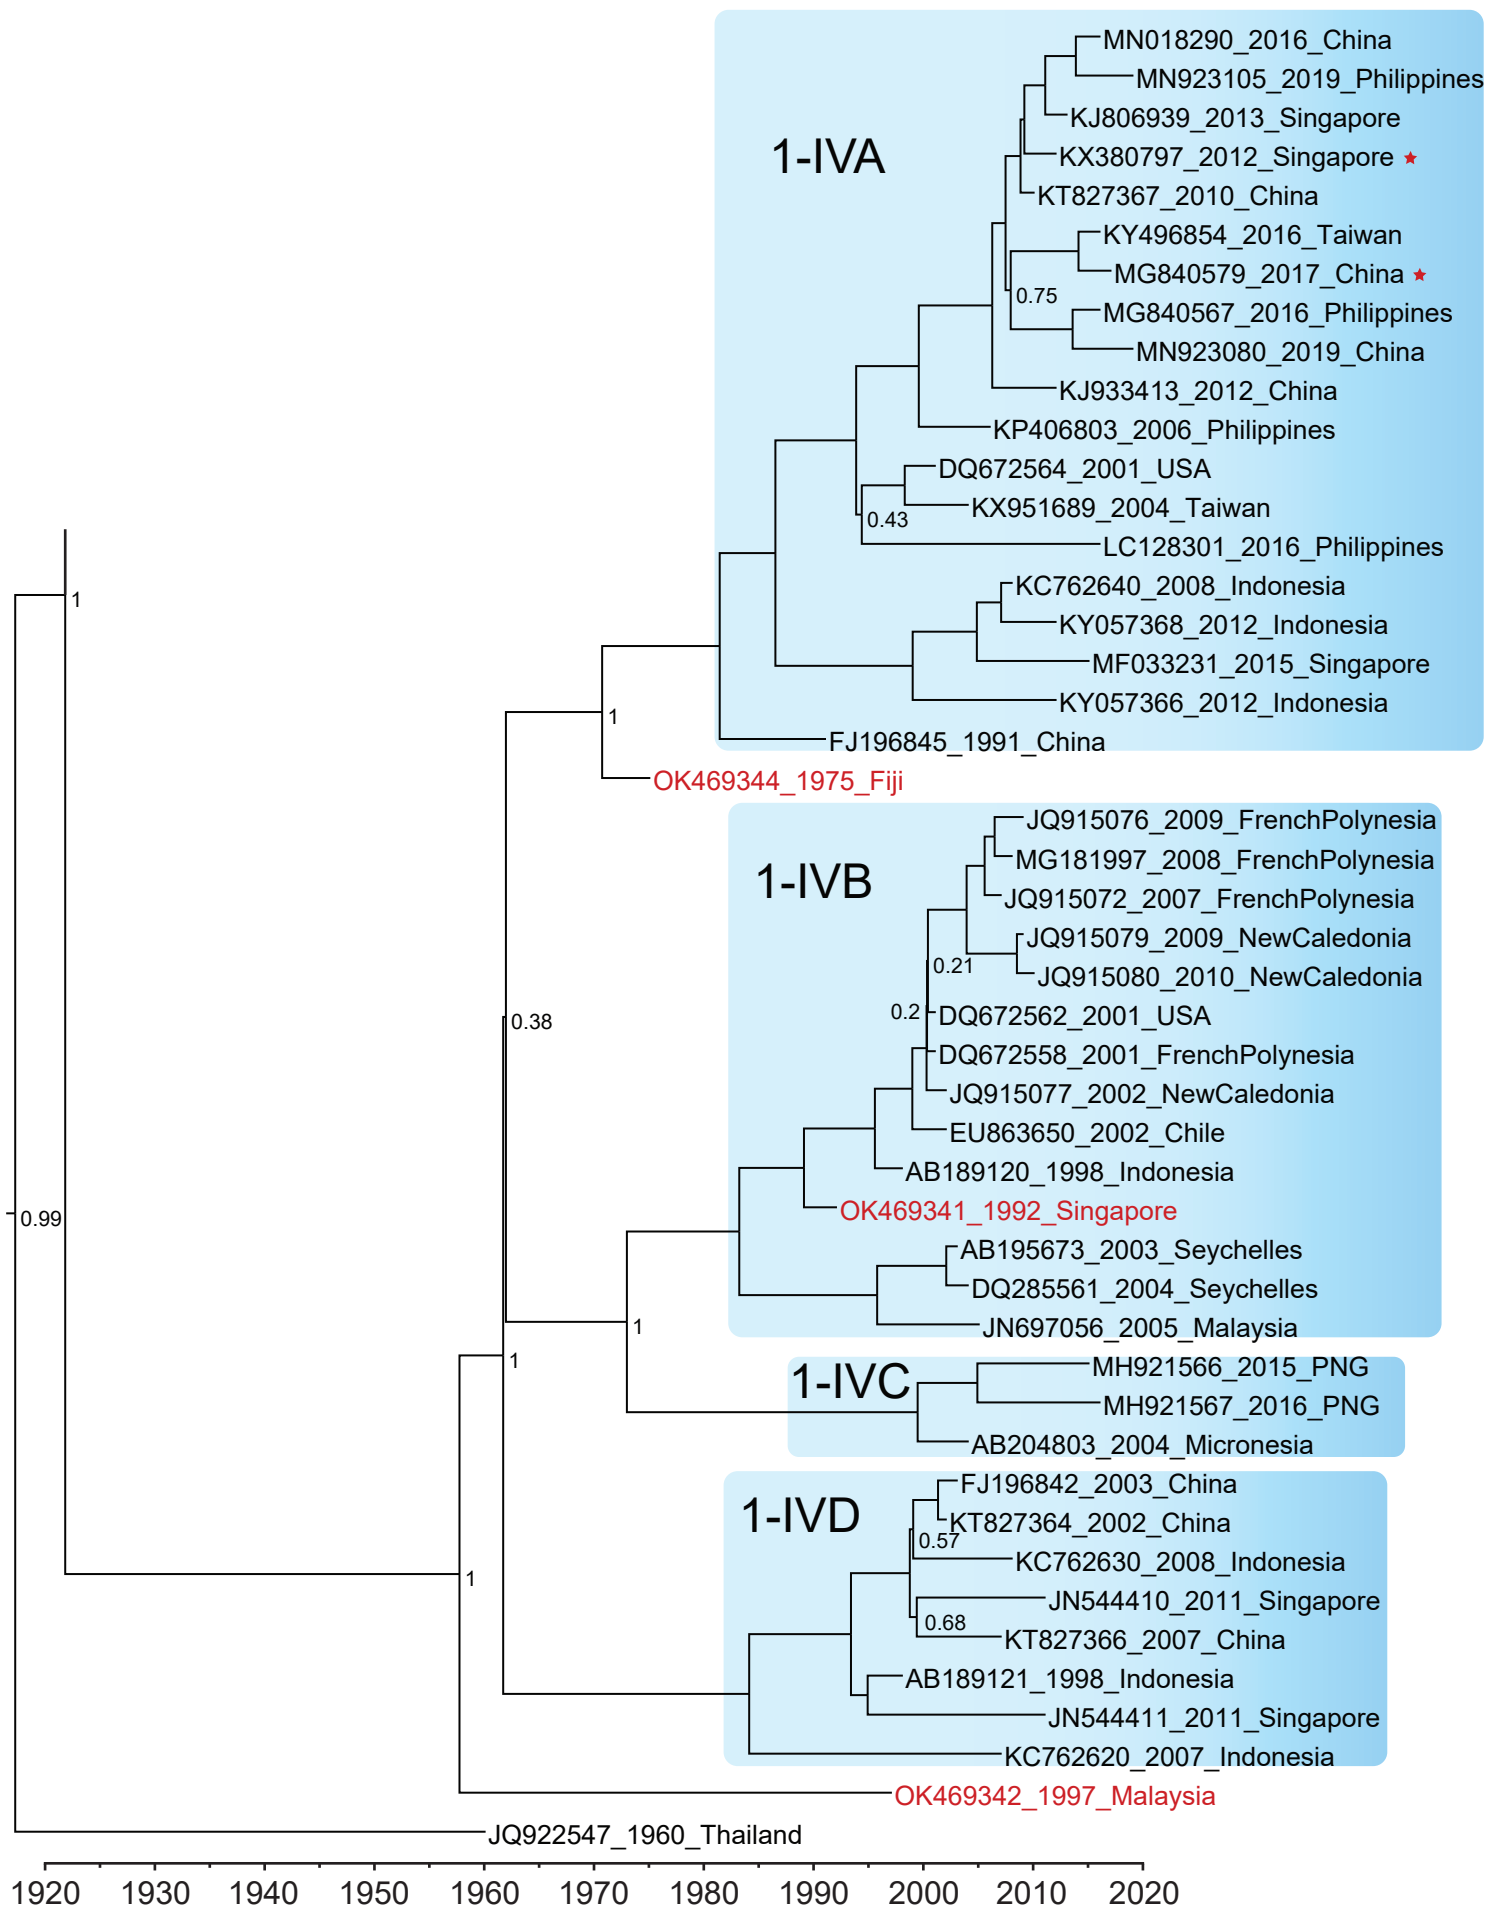

### Figure S9c

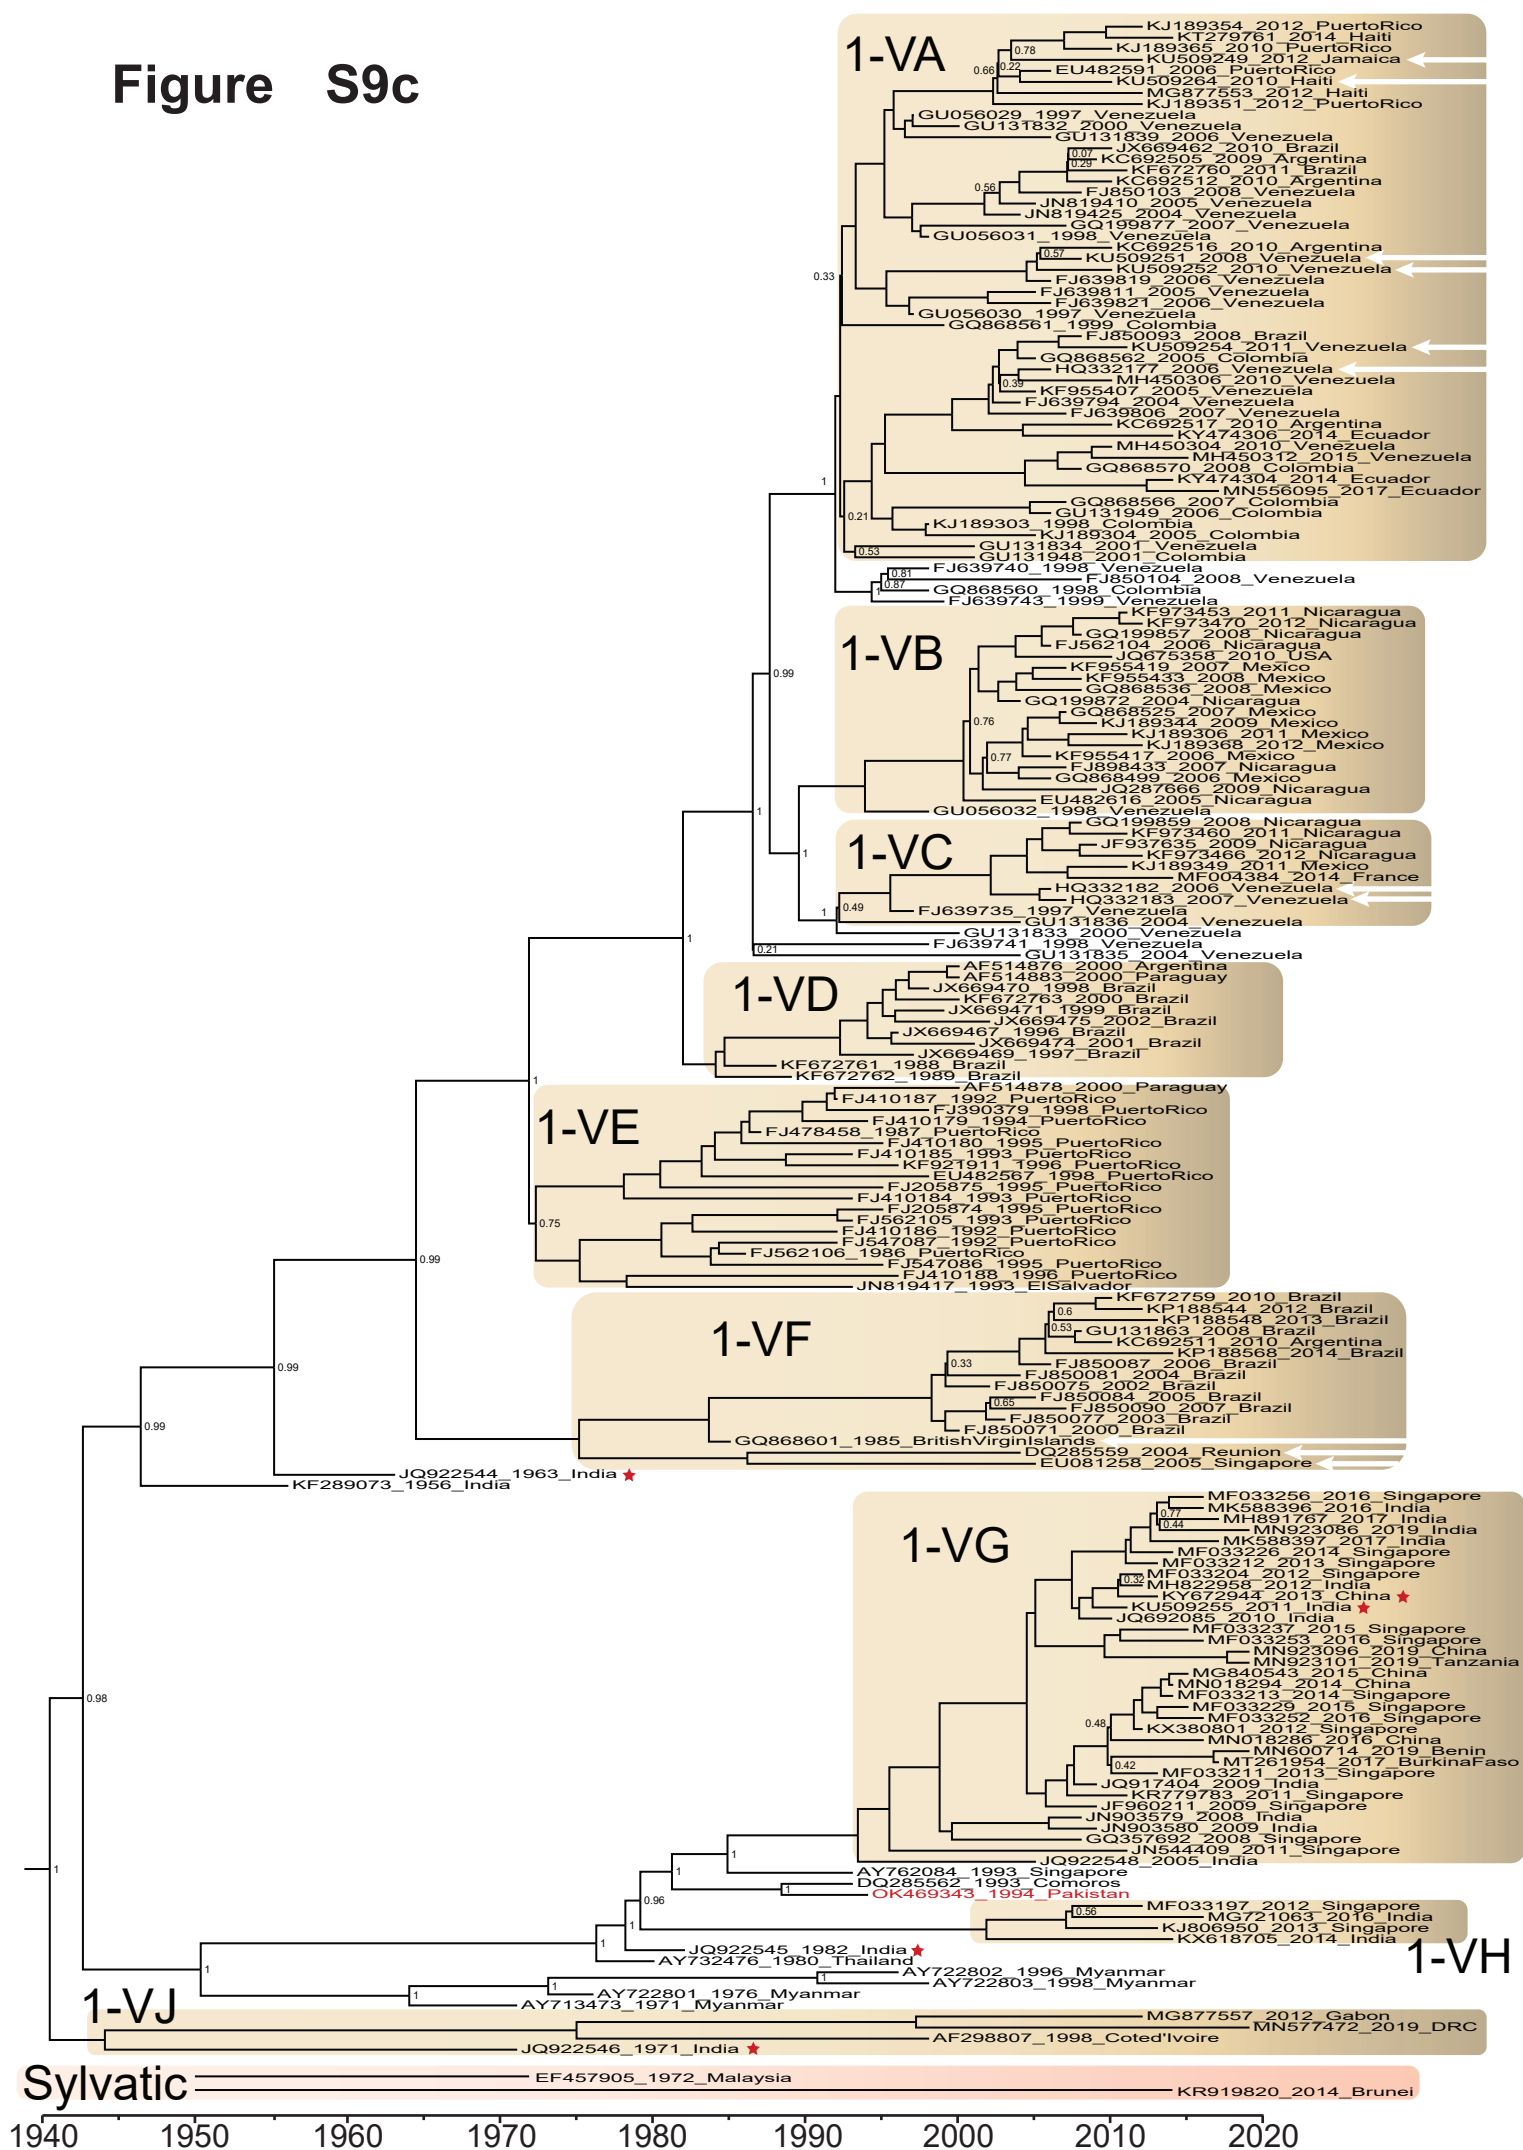

**Supplemental Figure S10: DENV1 E Gene MCMC Trees.** (a) DENV1 E gene MCMC tree, (b) Genotype 1-I, (c) Genotype 1-IV, (d) Genotypes 1-V (isolates incorrectly classified as 1-III indicated by arrows) and sylvatic. Posterior node support indicated for the major branches. Support values >0.8 have been eliminated in most instances for clarity. Red circles/font indicates newly sequenced isolates from the QUT Arbovirus collection. Branches under positive selection (see section 3.2.2) are indicated by a red star. Scale axis is representative of calendar years.

Figure S10a

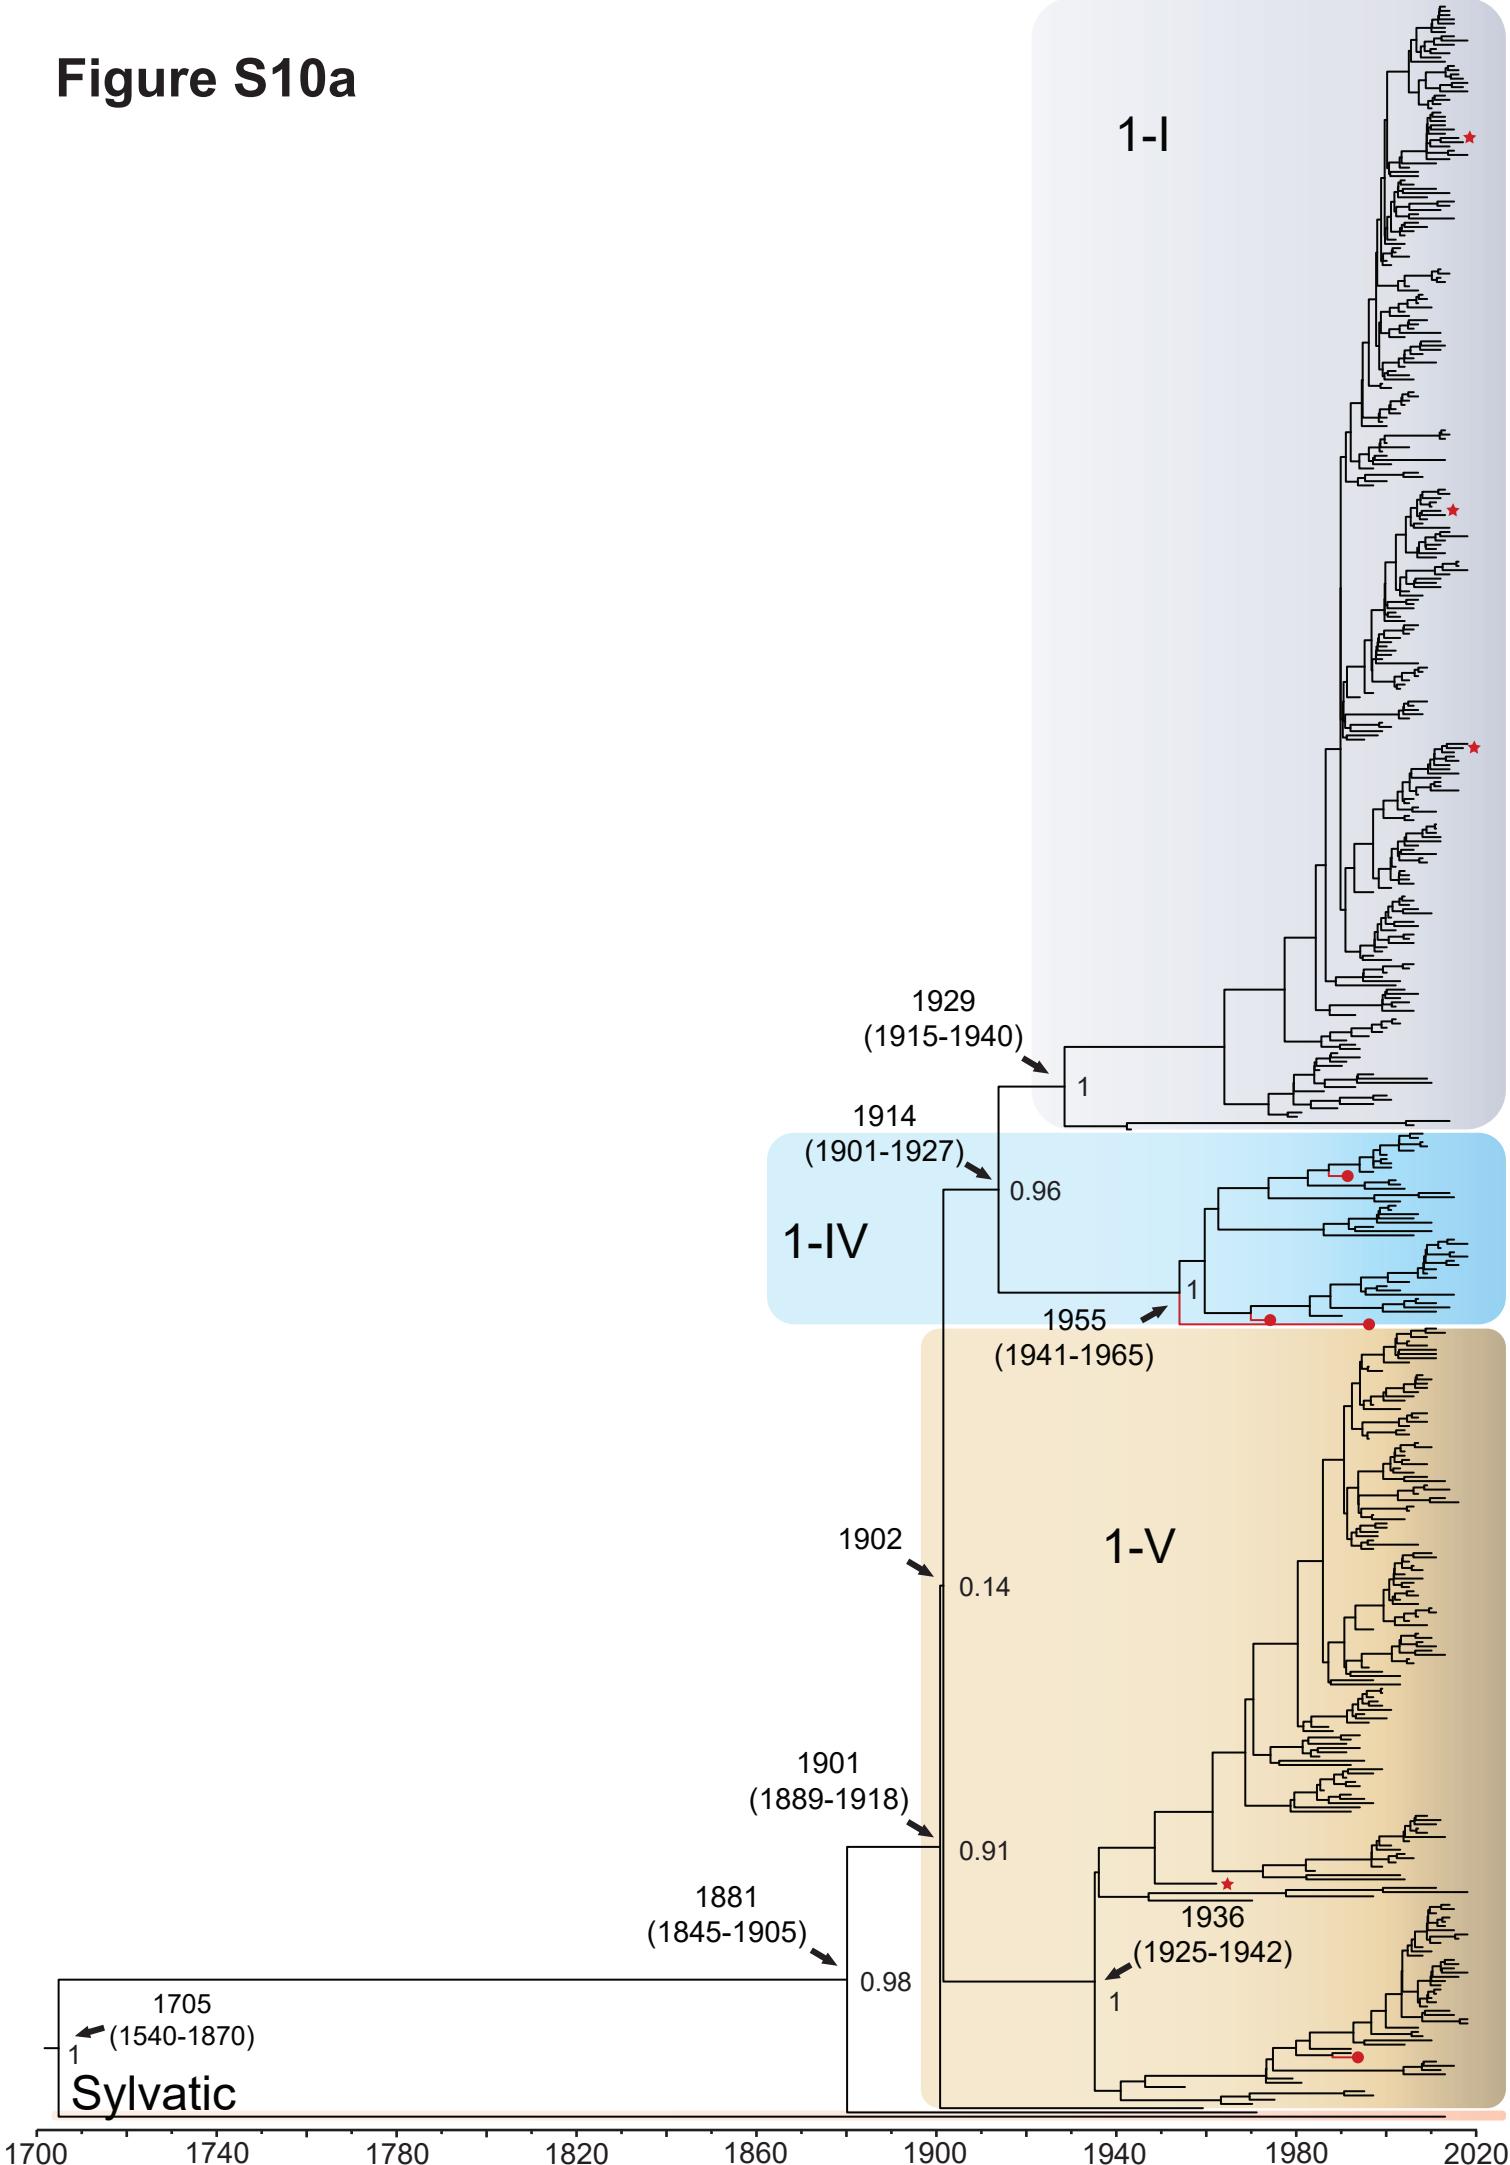

### Figure S10b

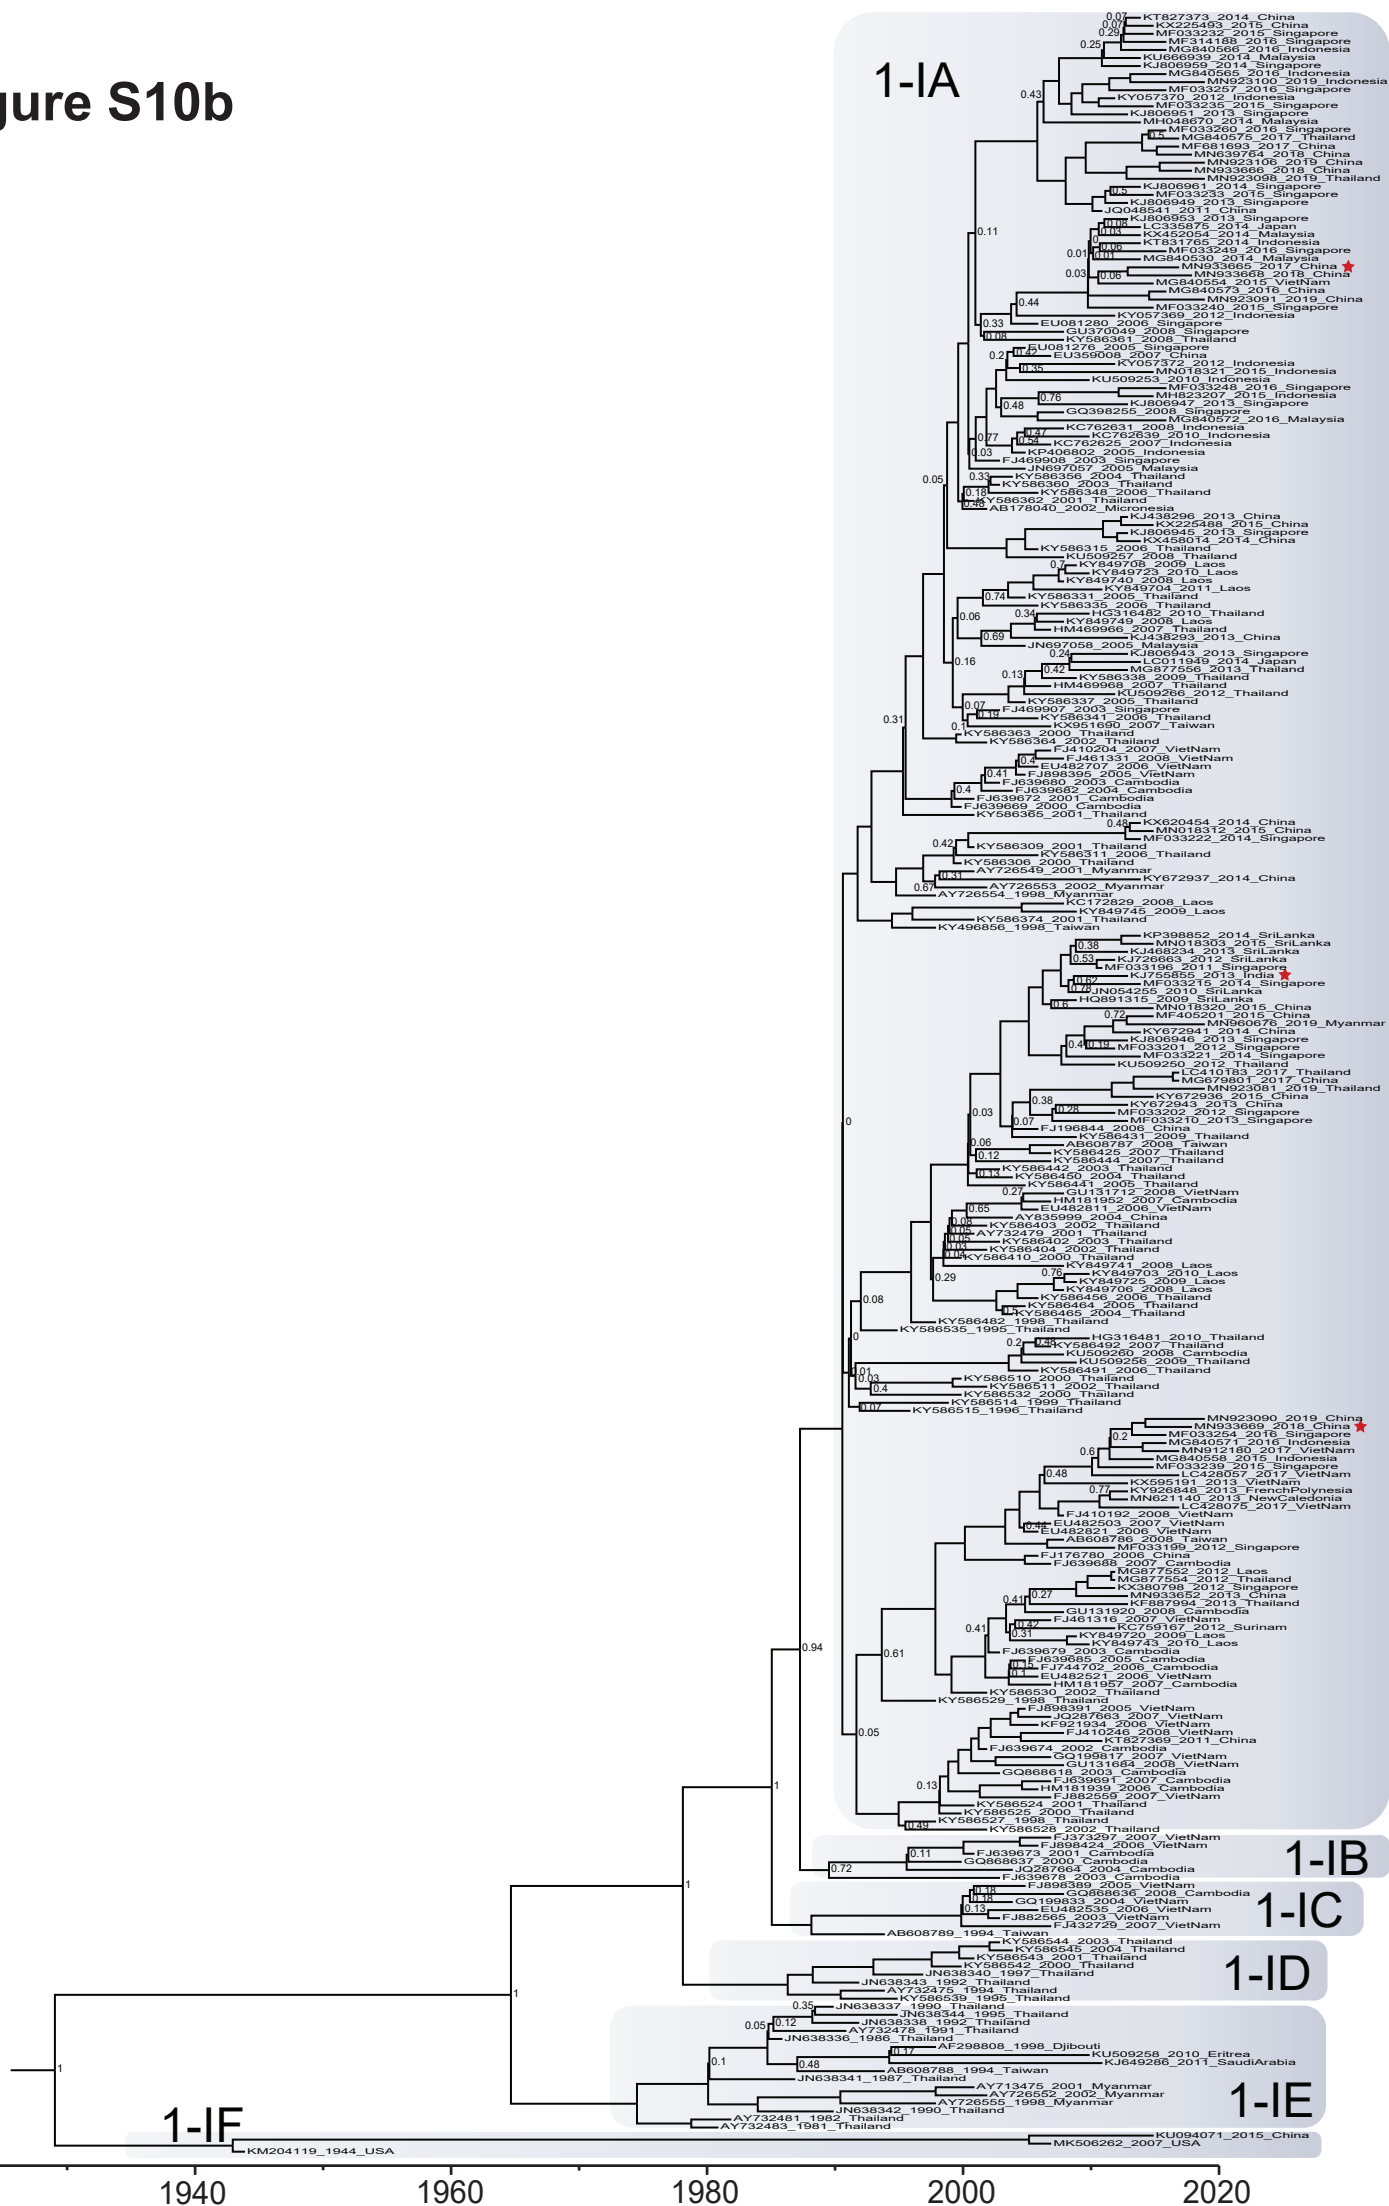



Figure S10c

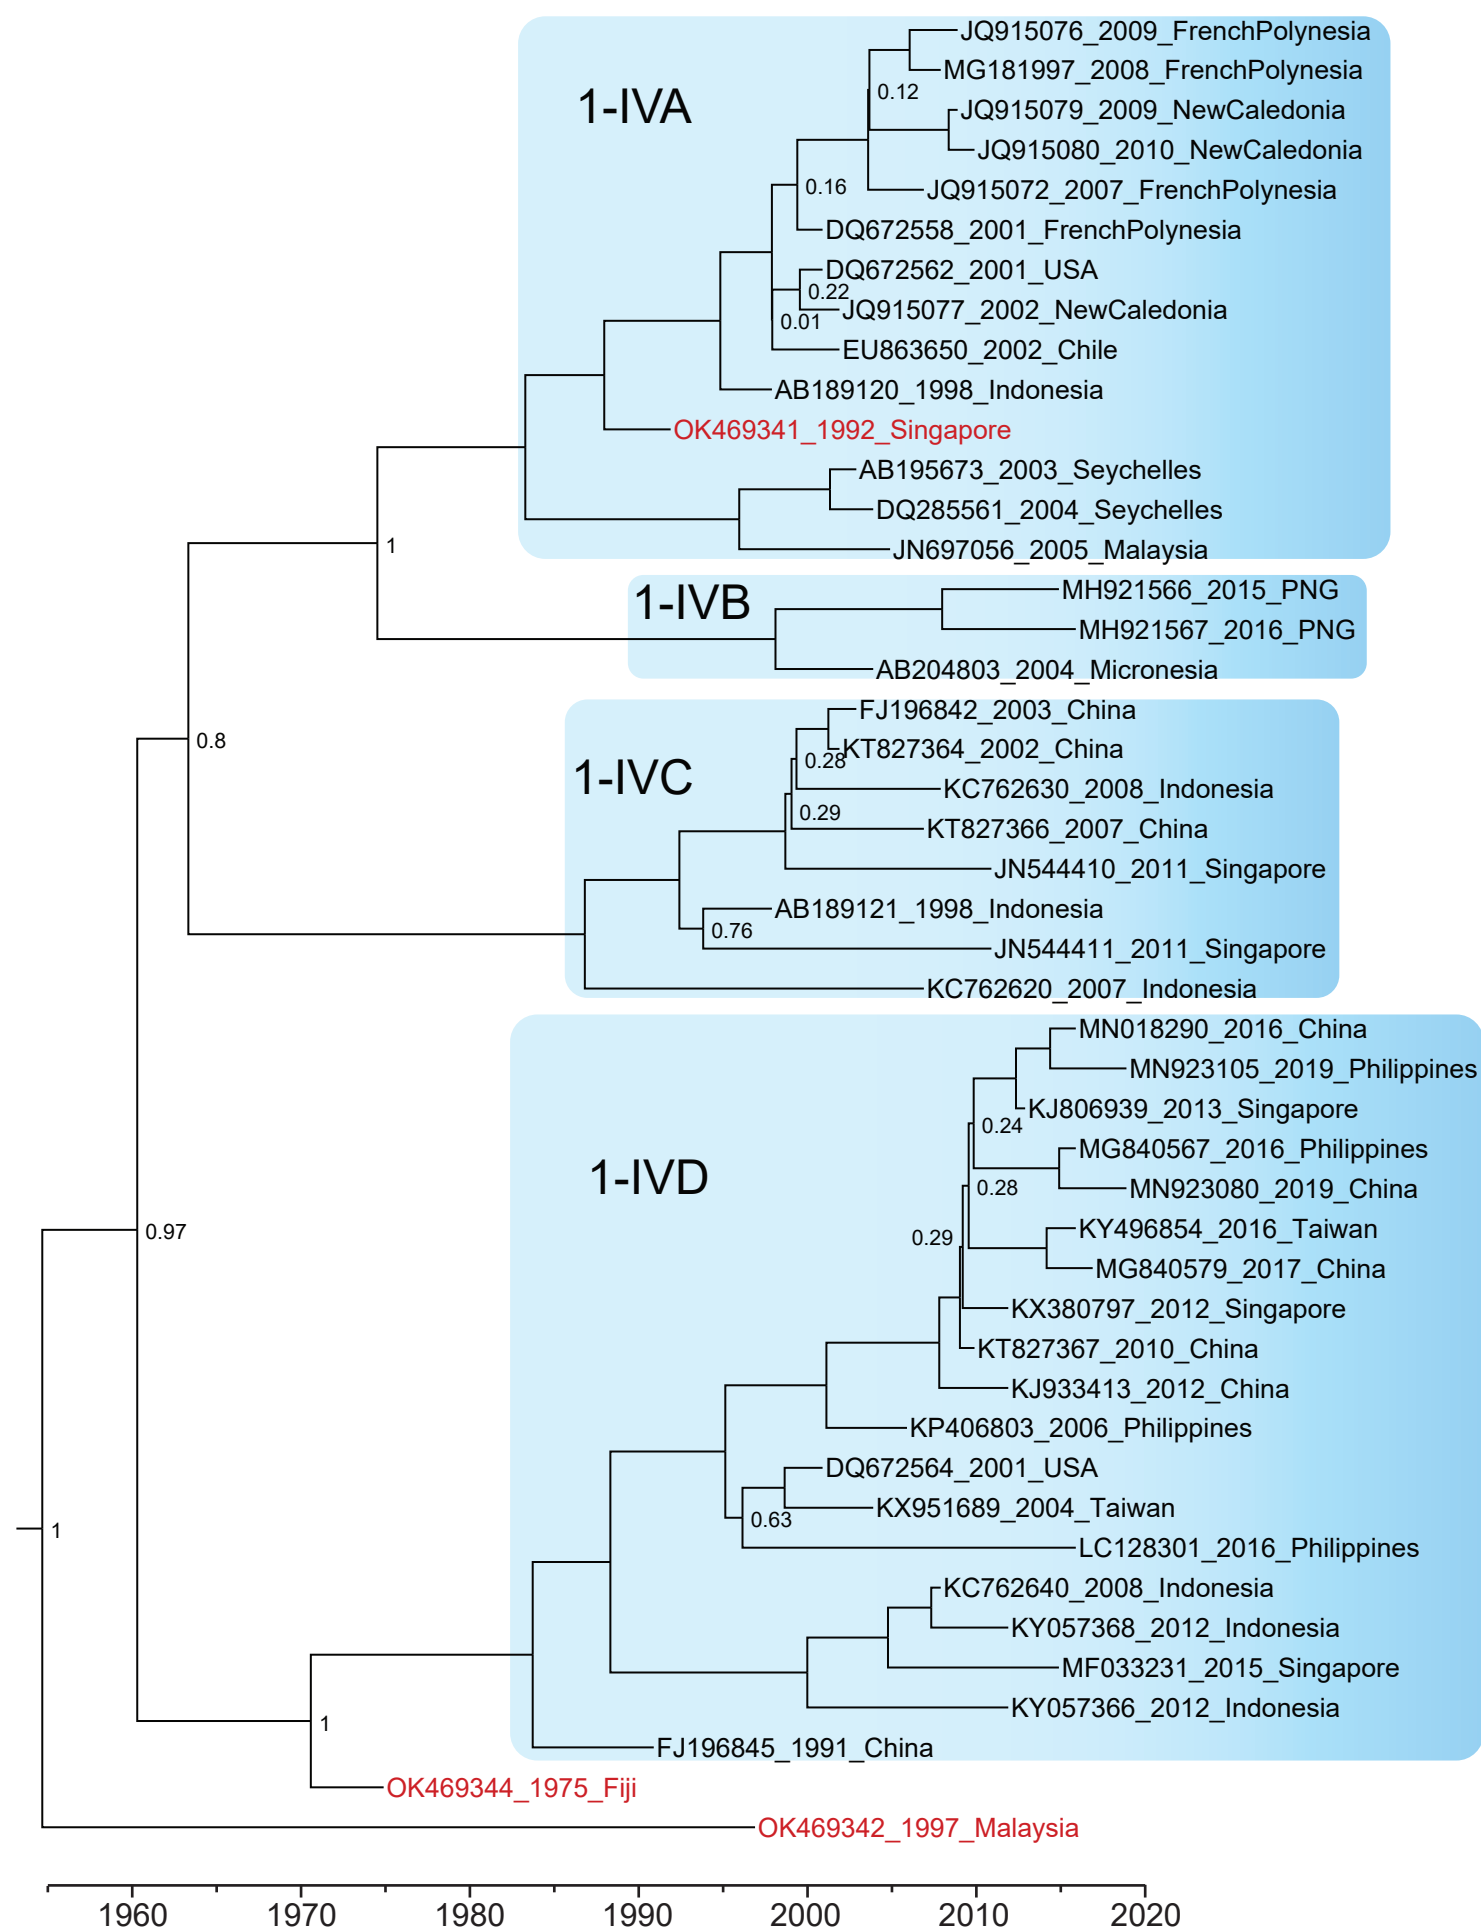

Figure S10d

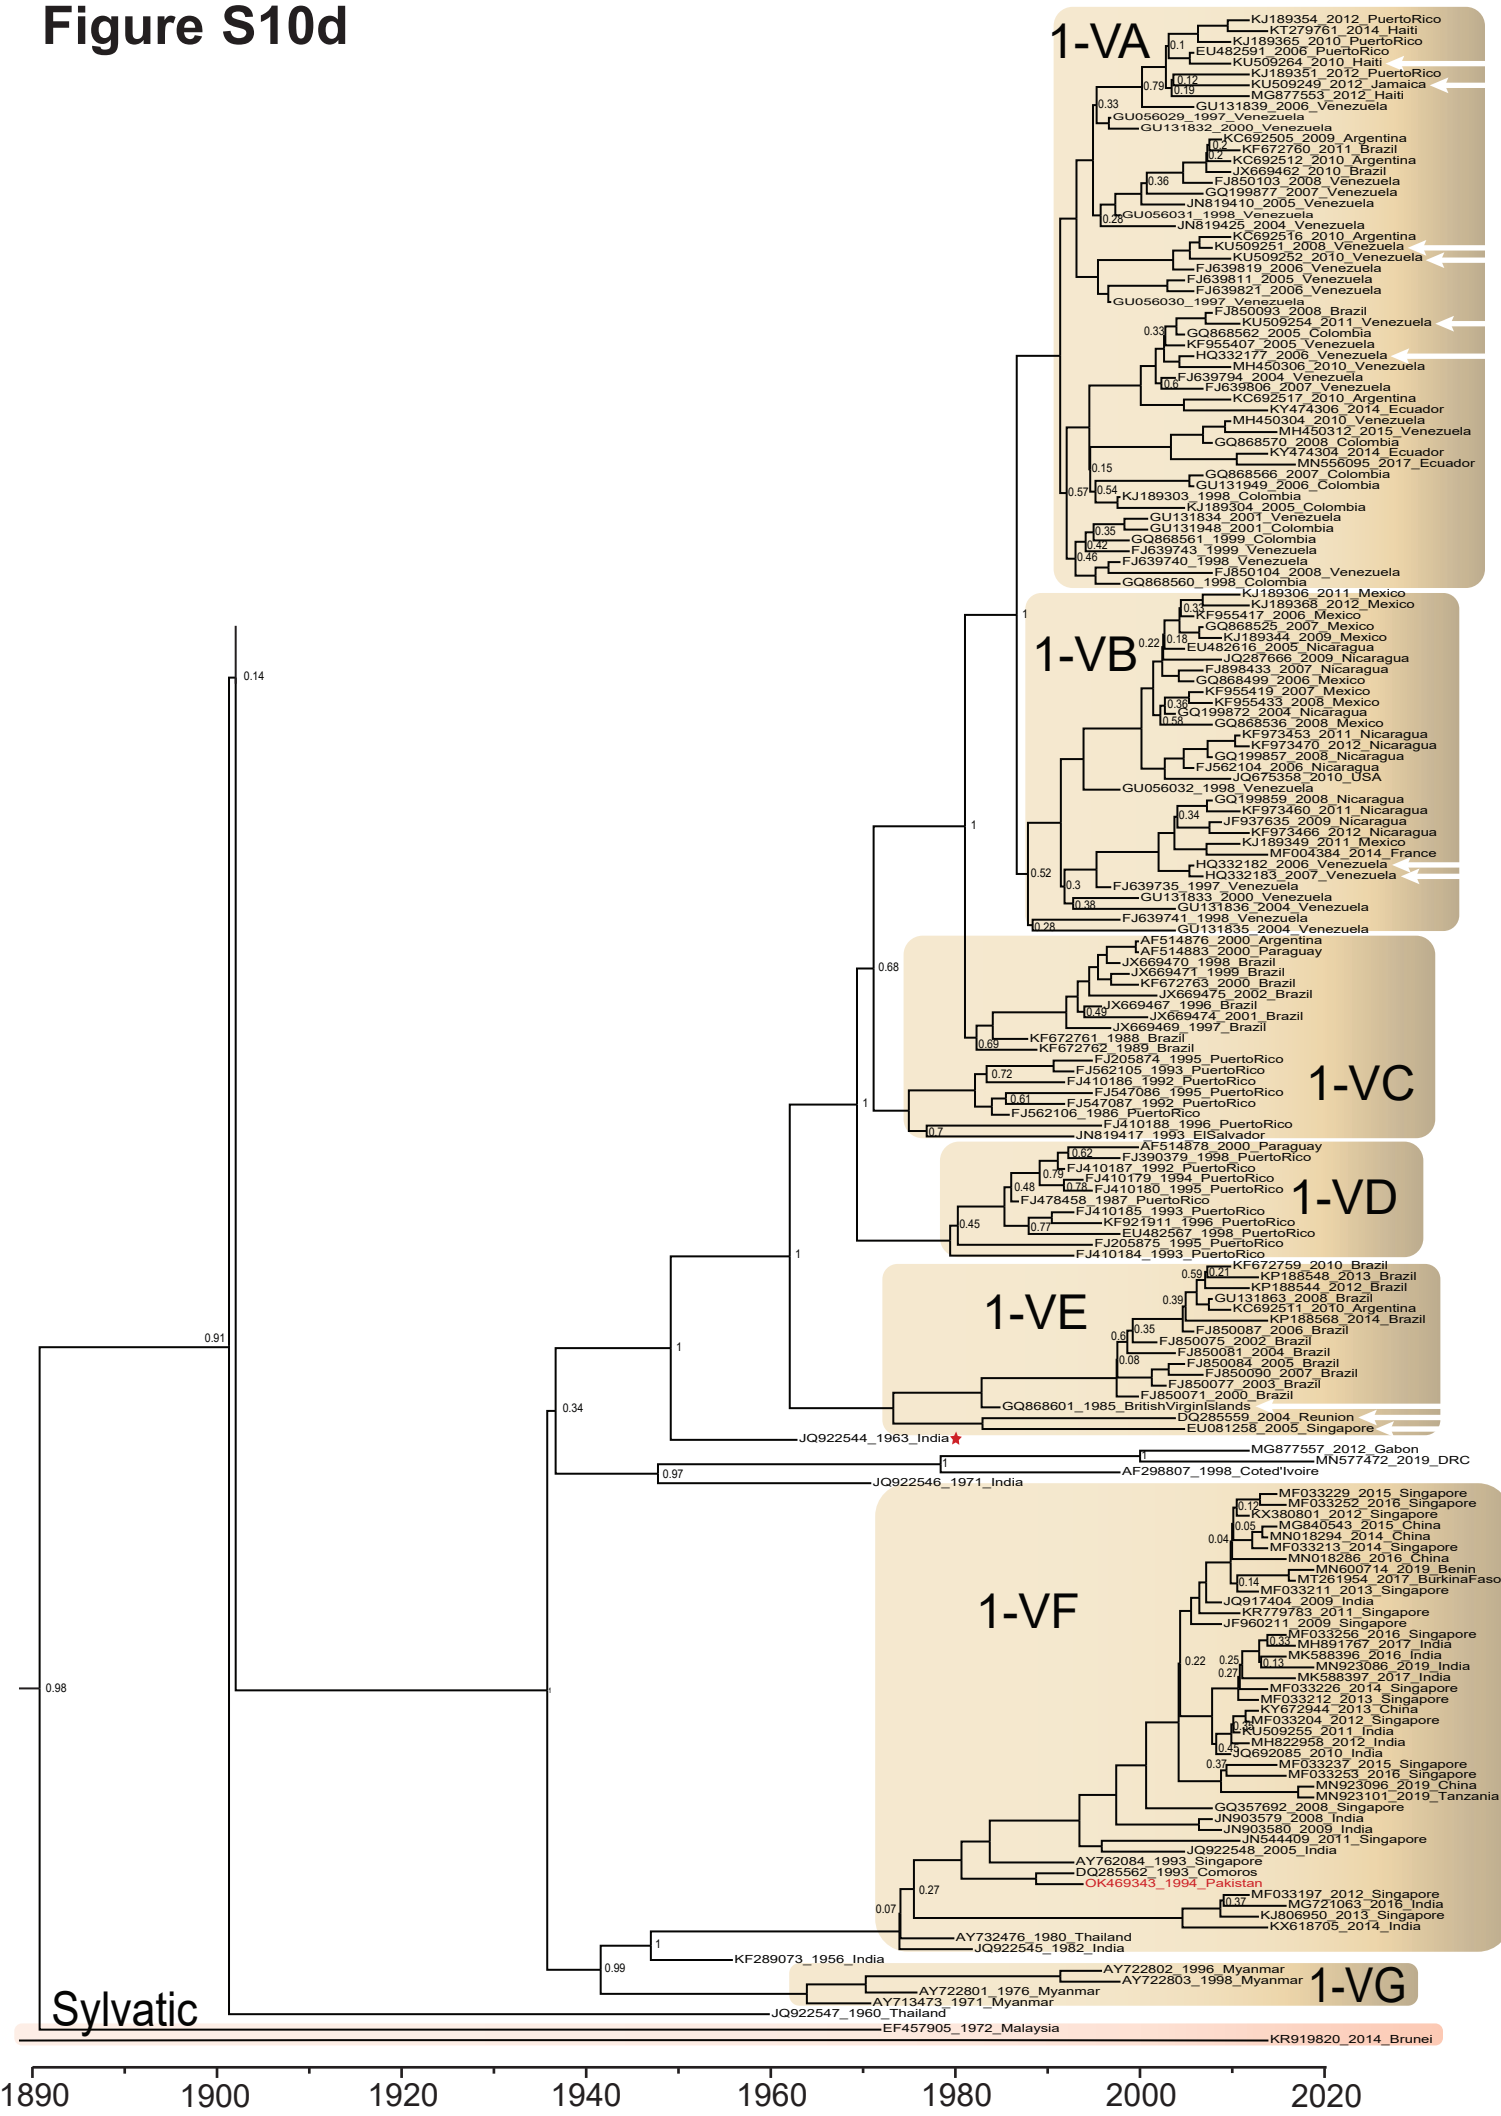

**Supplemental Figure S11: DENV2 Whole Genome Genotypes MCMC Trees.** (a) Asian American and Asian II genotypes, (b) Asian I genotype, (c) Cosmopolitan genotype, (d) American and sylvatic genotypes. Posterior node support indicated for the major branches. Support values >0.8 have been eliminated in most instances for clarity. Red font indicates newly sequenced isolates from the QUT Arbovirus collection. Branches under positive selection (see section 3.2.2) are indicated by a red star. Scale axis is representative of calendar years.

Figure S11a

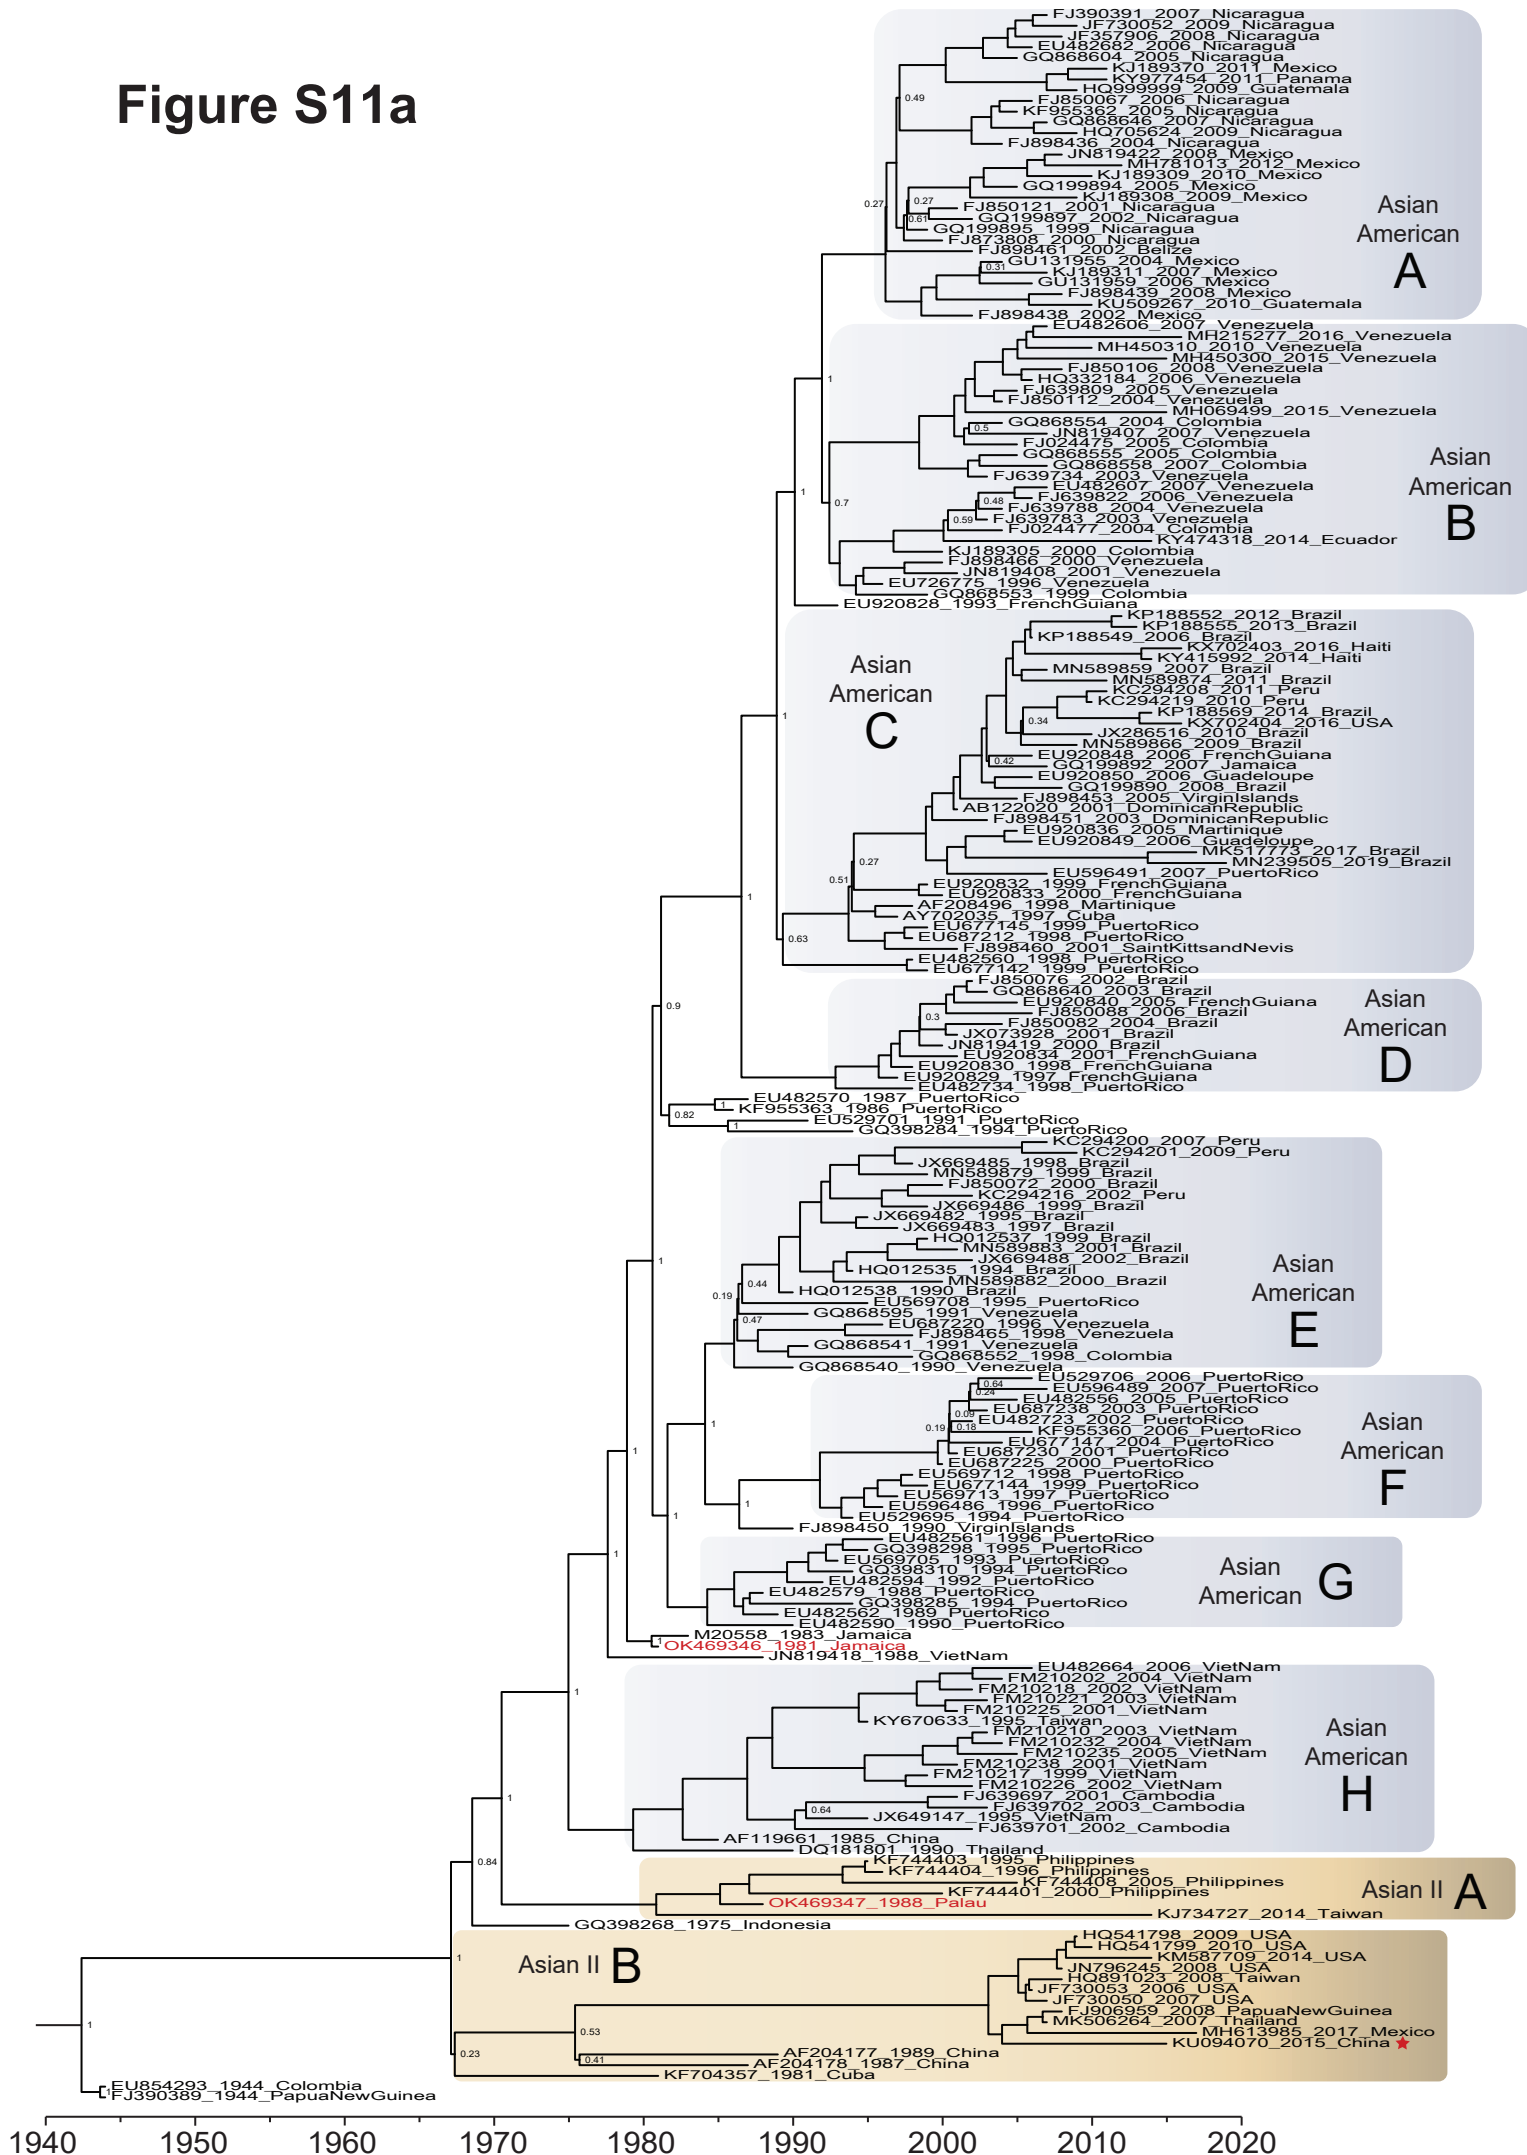

Figure S11b

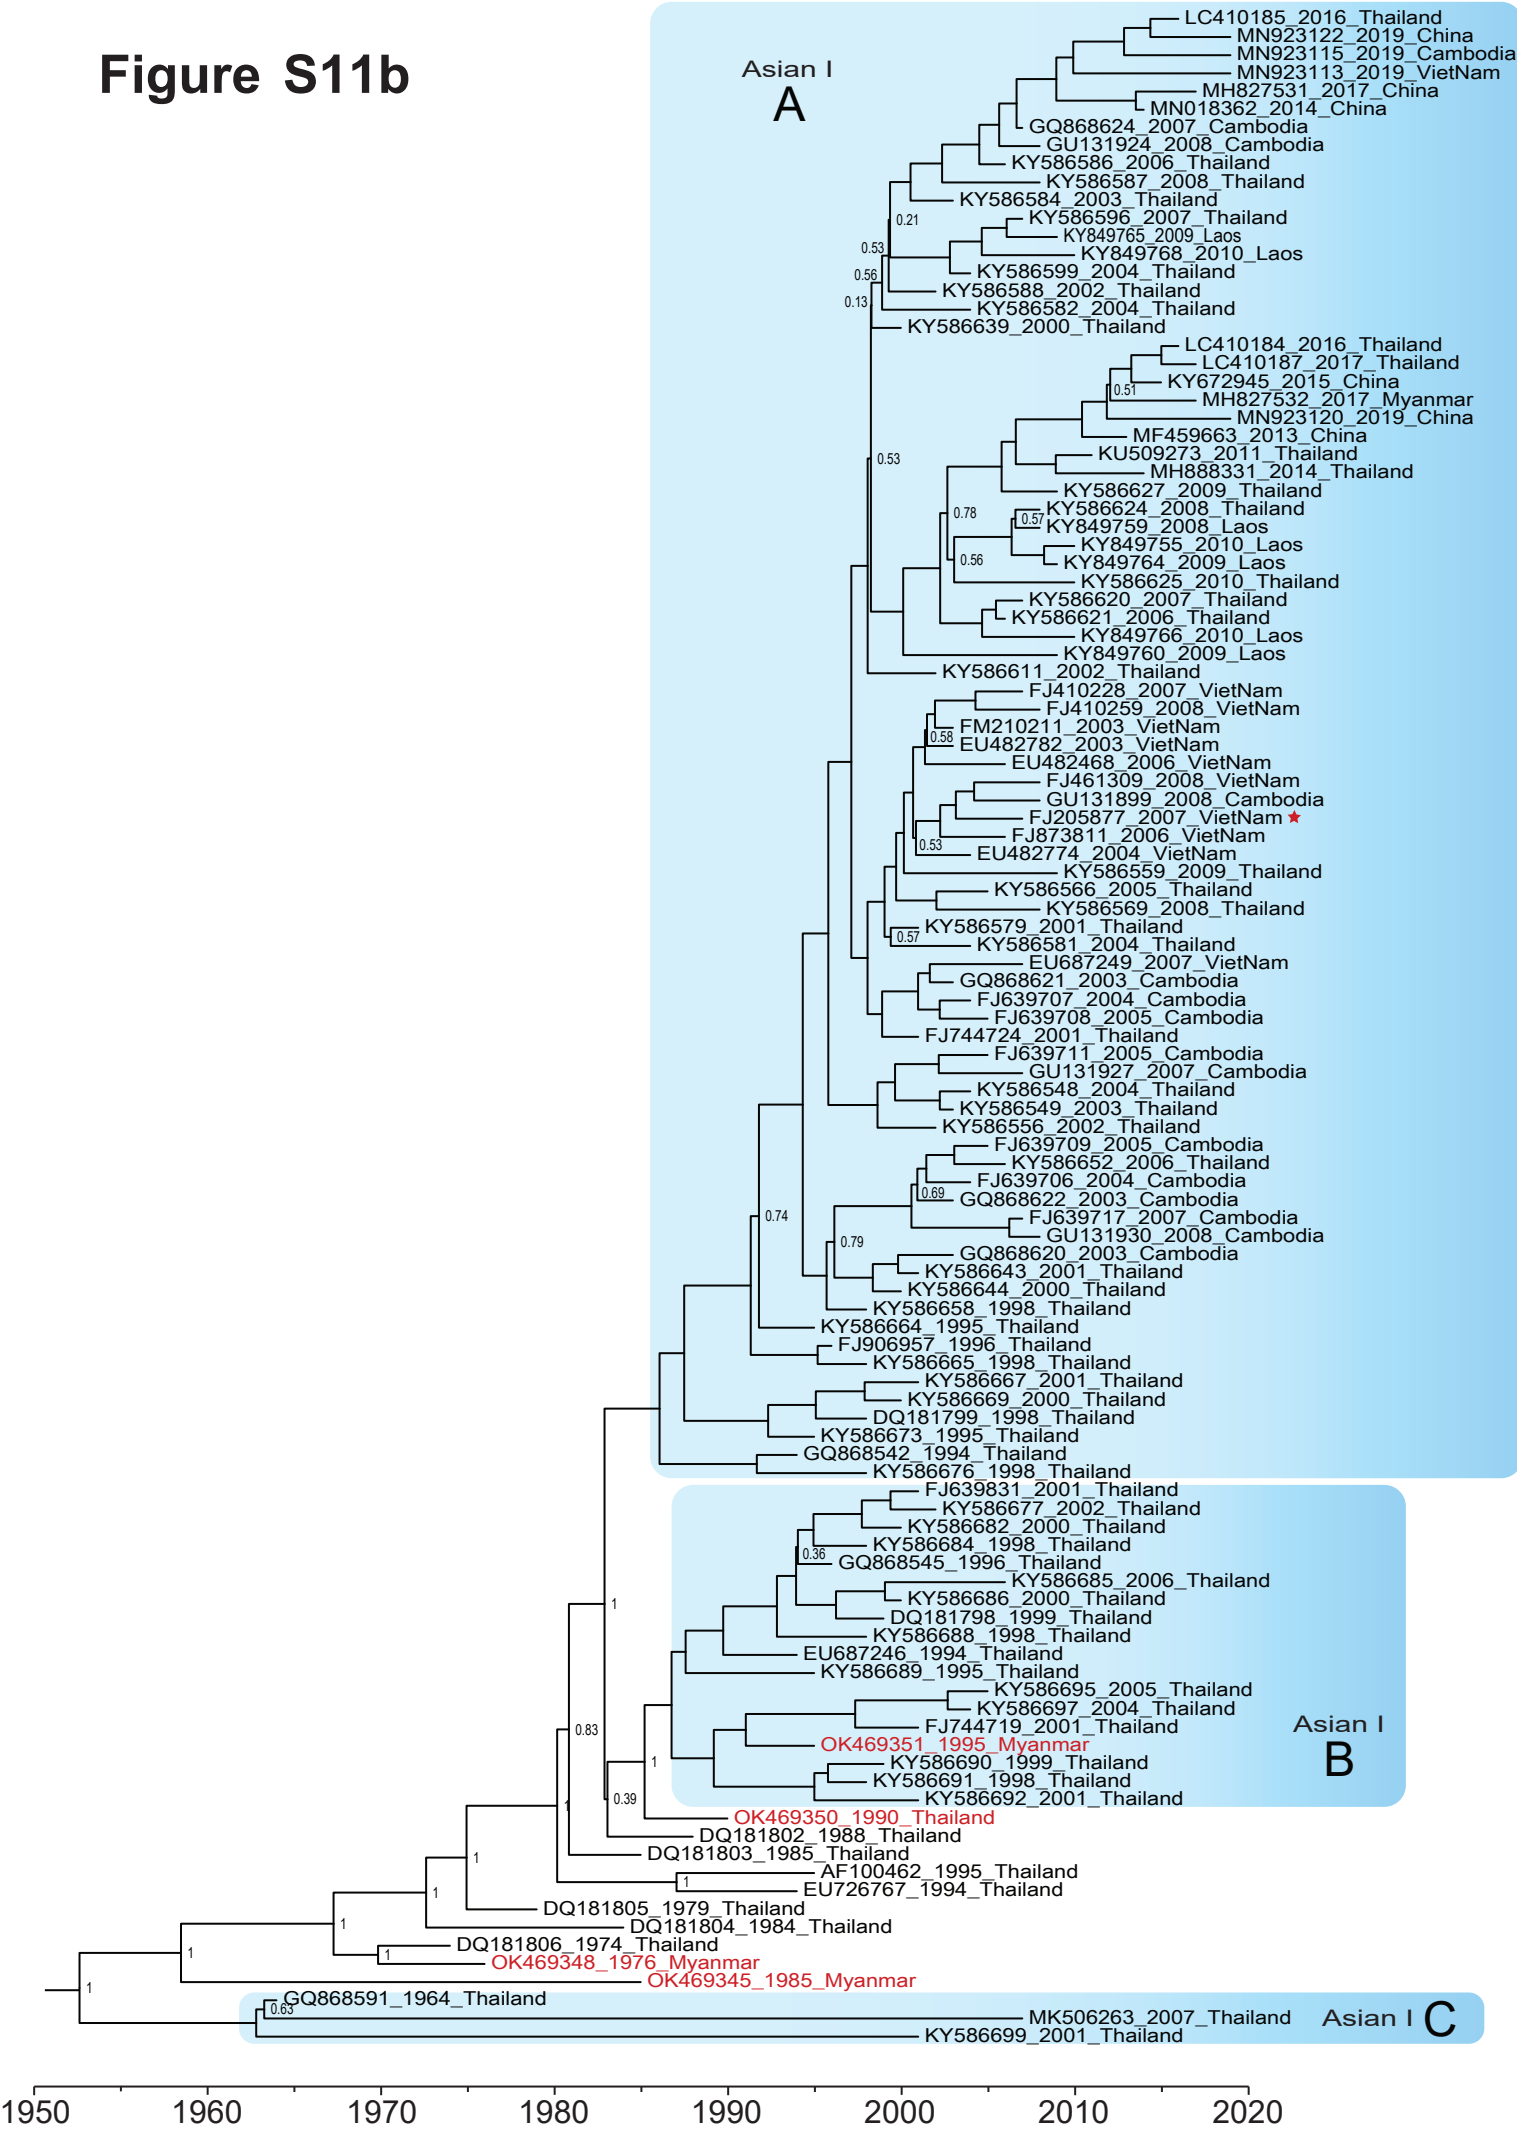



Figure S11c

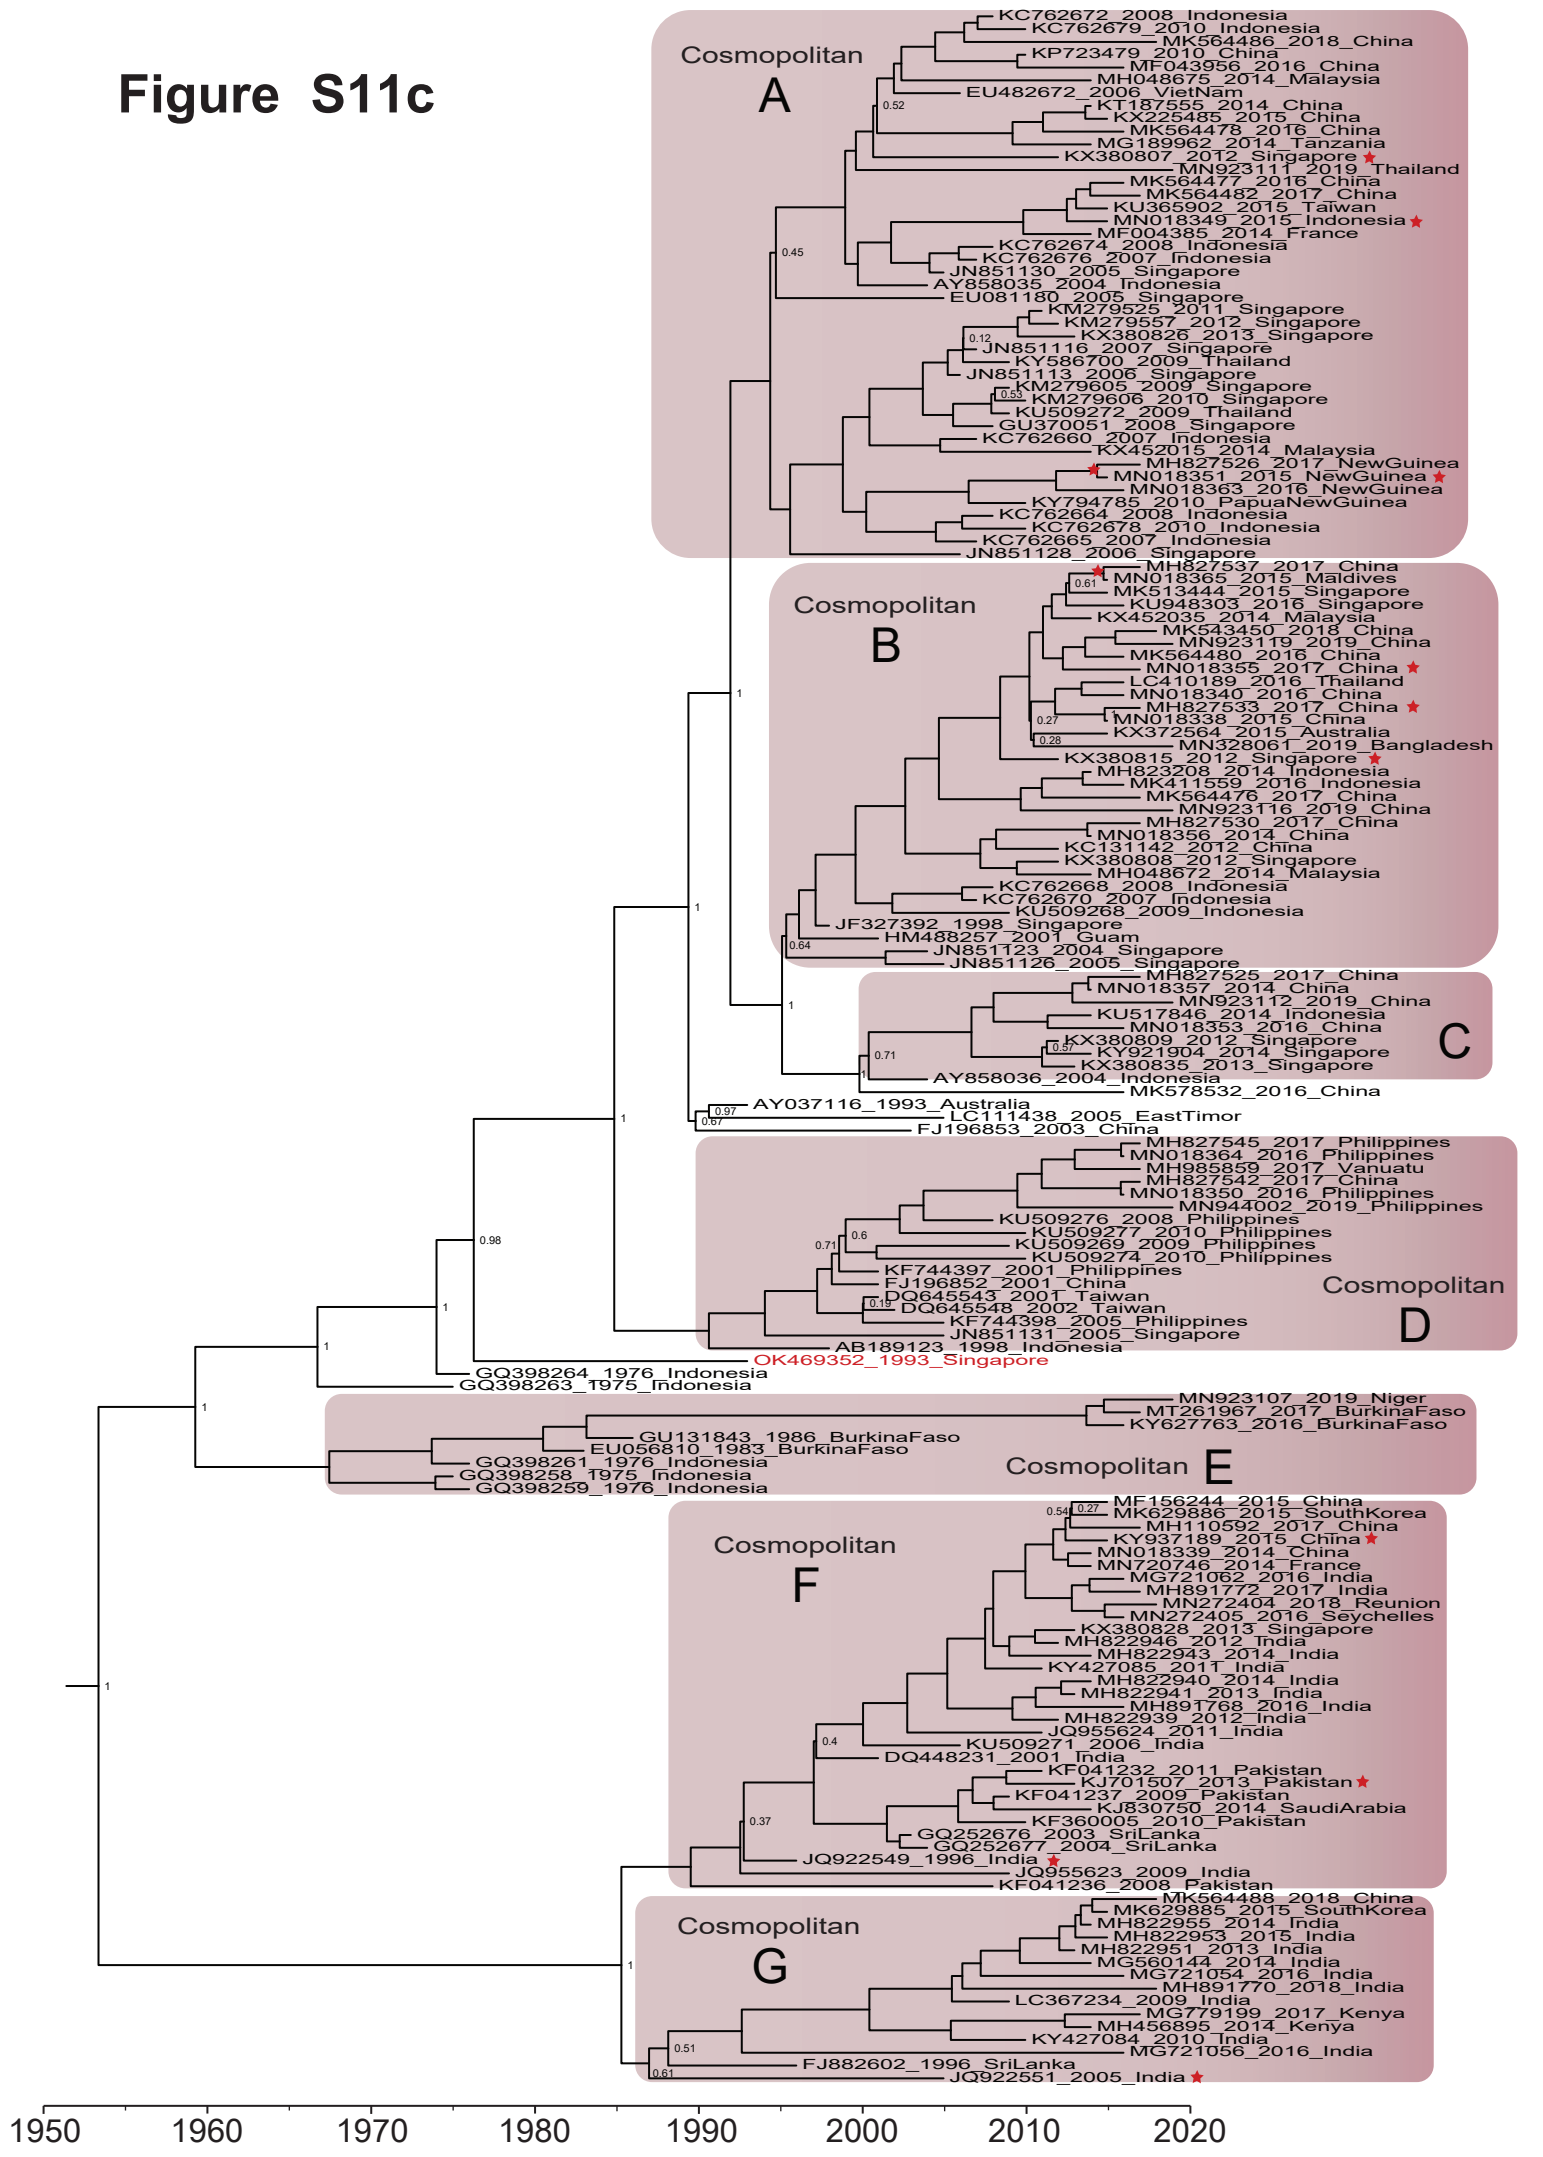

Figure S11d

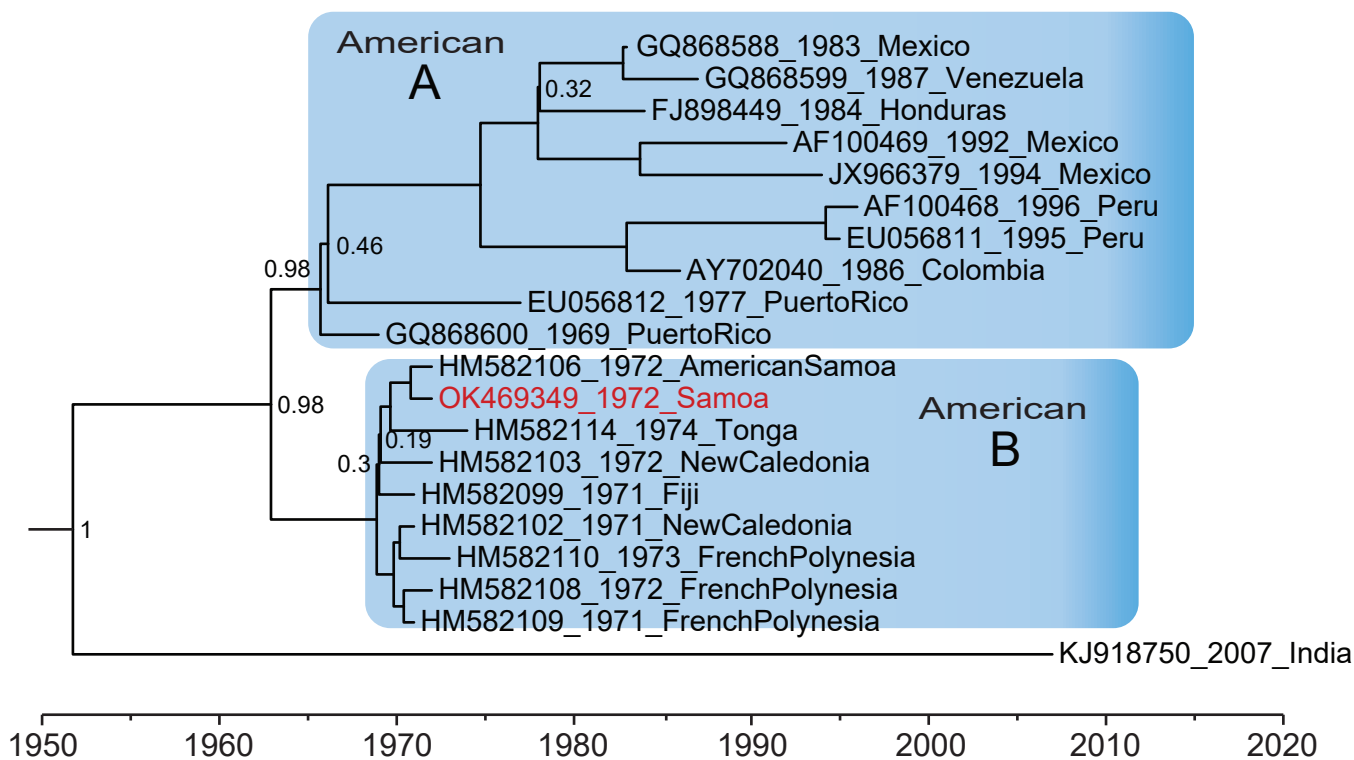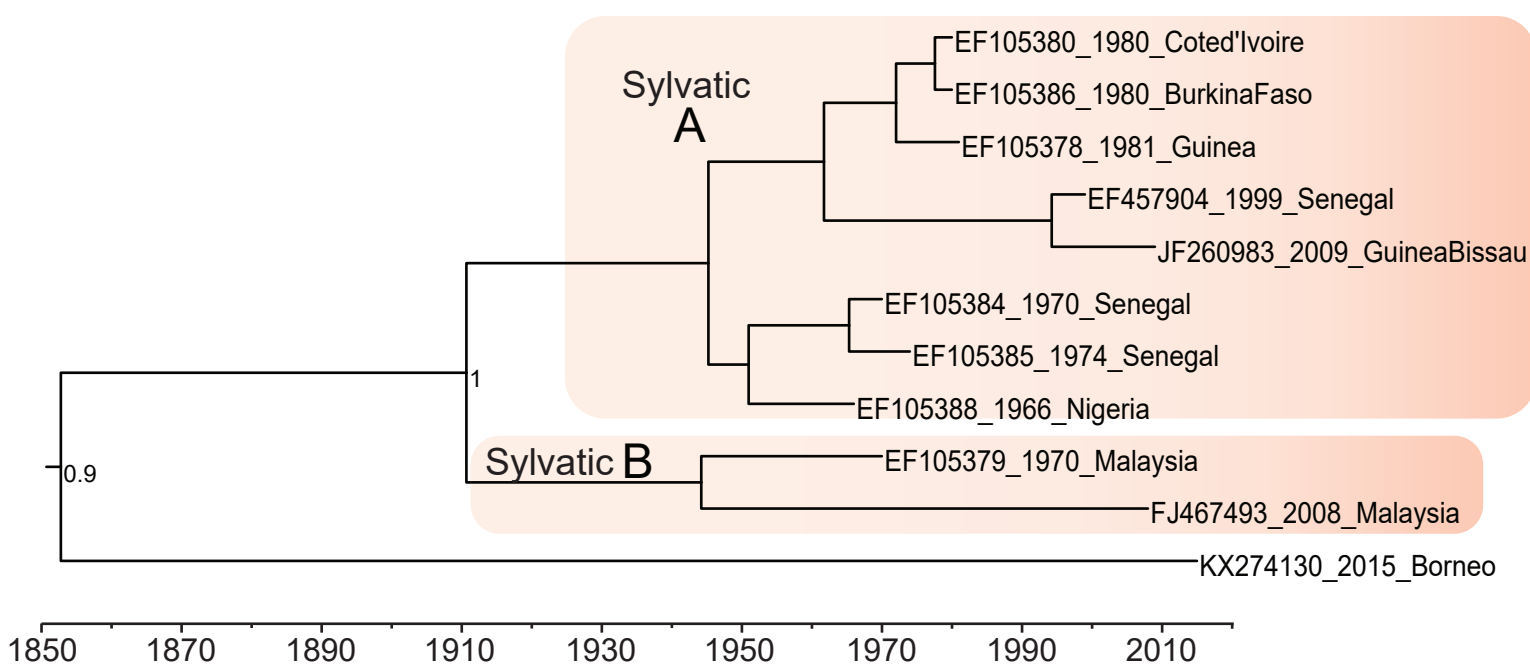

**Supplemental Figure S12: DENV2 E Gene MCMC Trees.** (a) DENV2 E gene MCMC tree, (b) Asian American genotype, (c) Asian I and Asian II genotypes, (d) Cosmopolitan genotype, (e) American and sylvatic genotypes. Posterior node support indicated for the major branches. Support values  $>0.8$  have been eliminated in most instances for clarity. Red circles/font indicates newly sequenced isolates from the QUT Arbovirus collection. Branches under positive selection (see section 3.2.2) are indicated by a red star. Scale axis is representative of calendar years.



Figure S12a

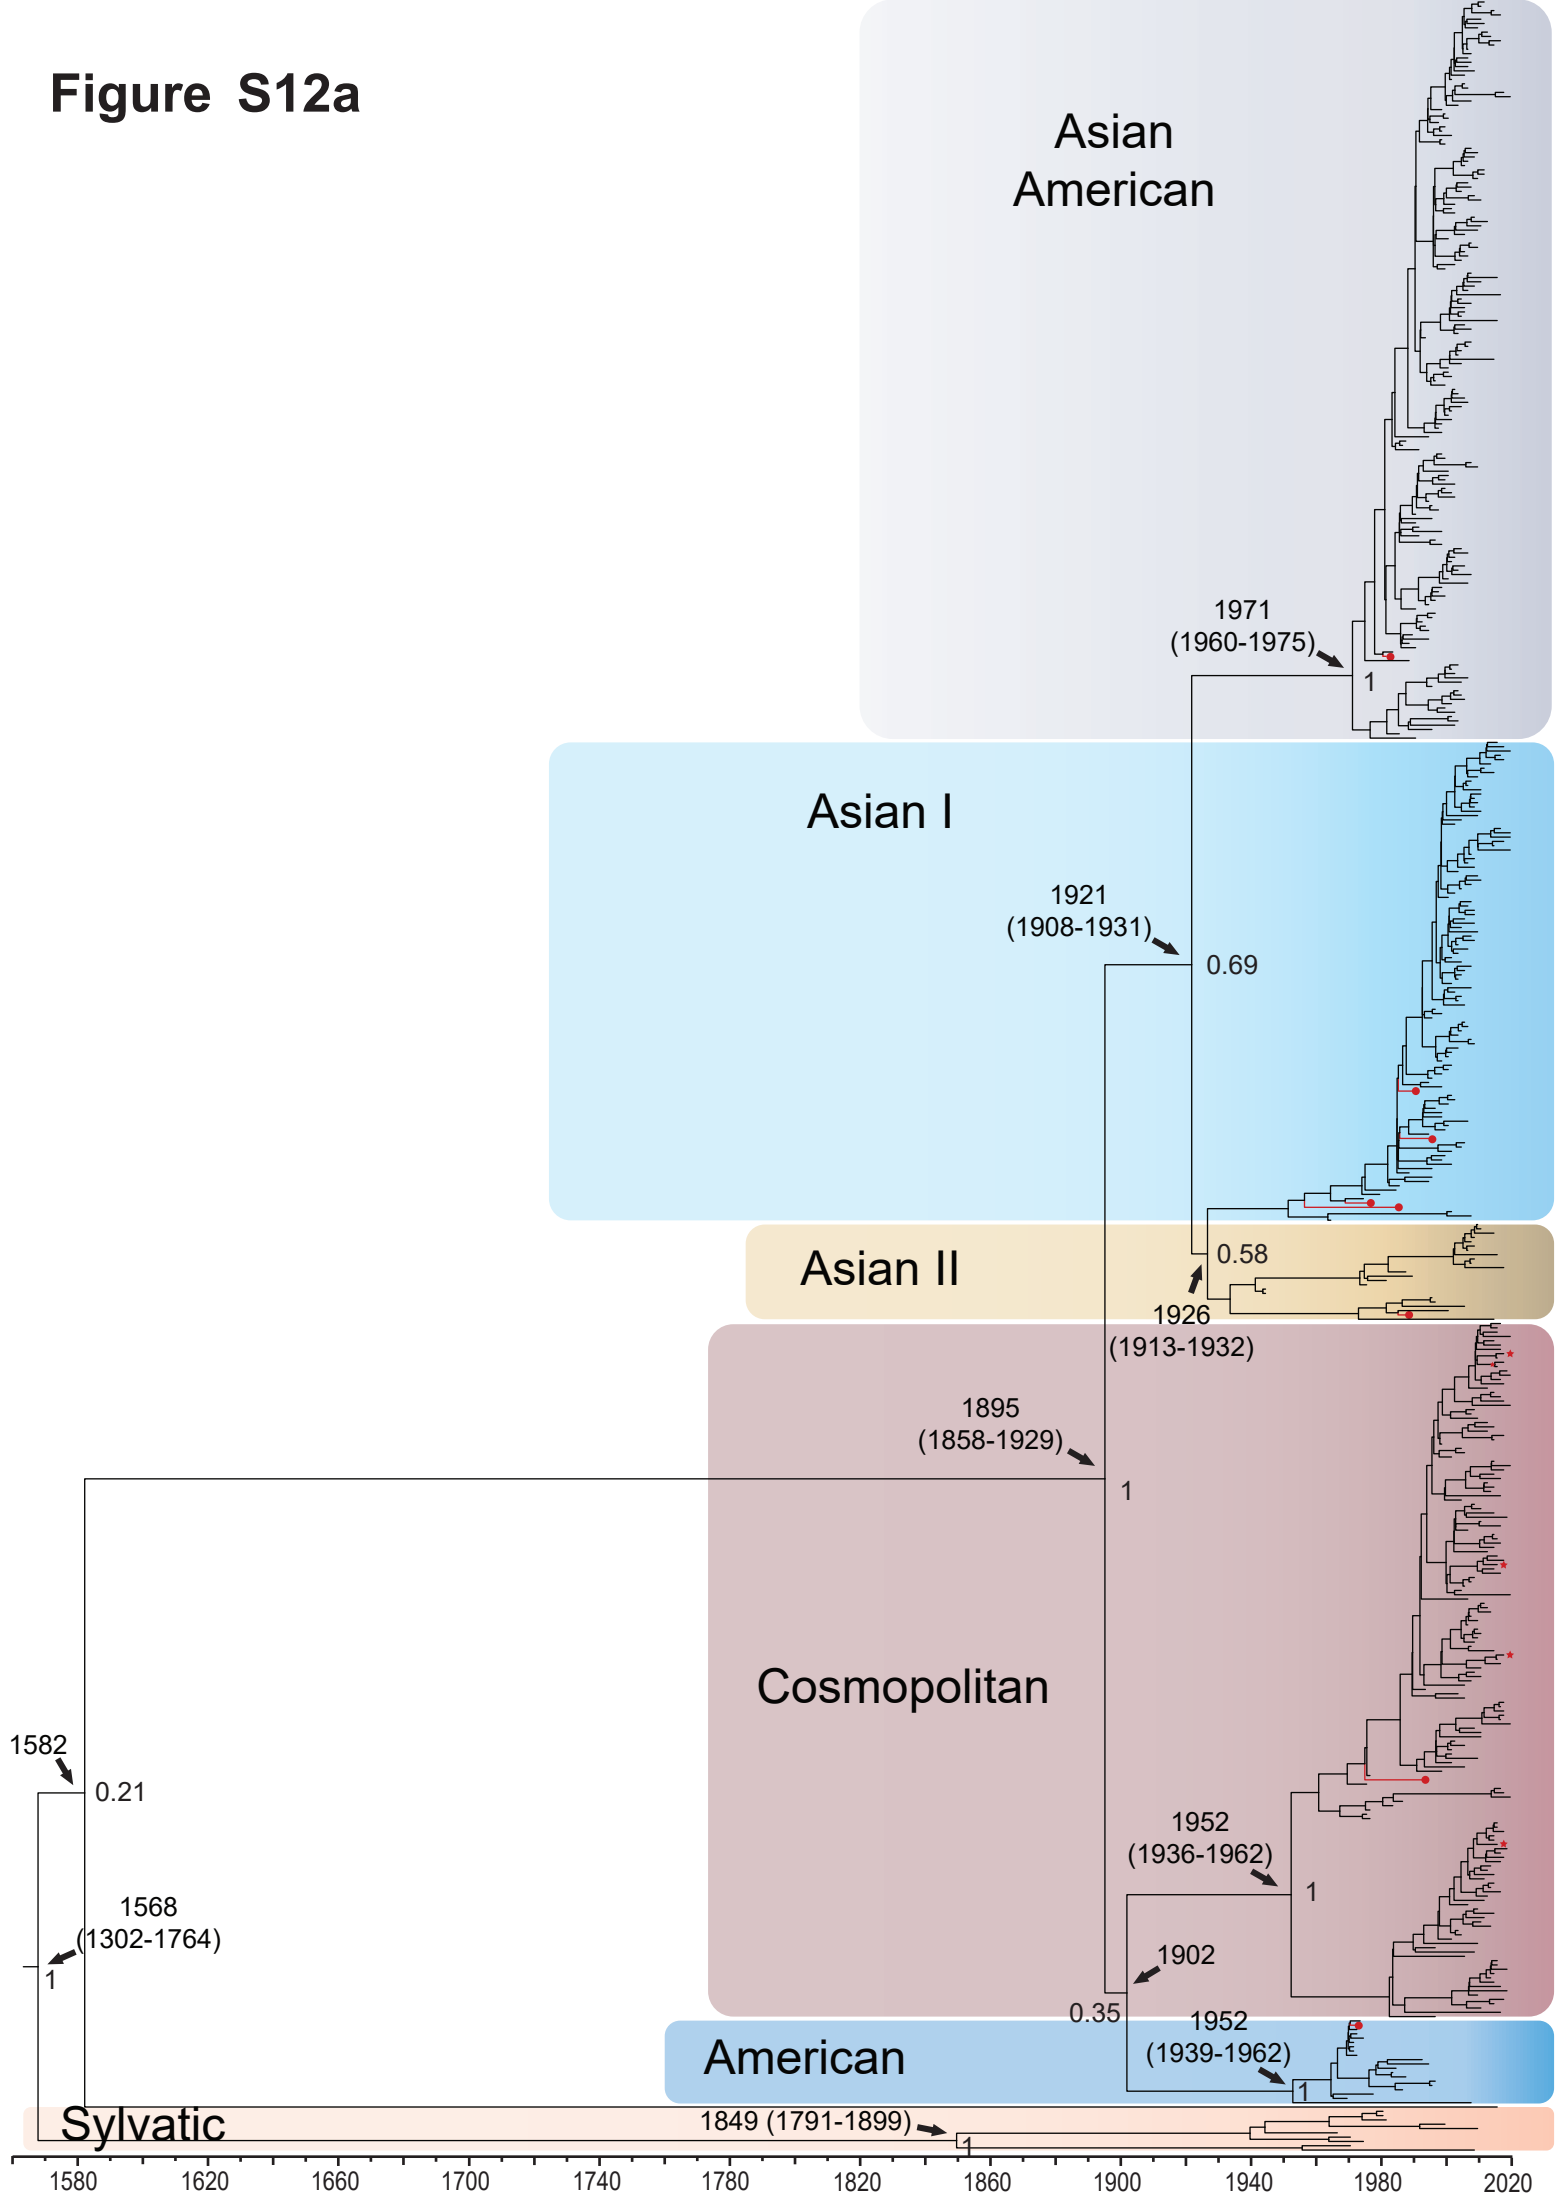

Figure S12b

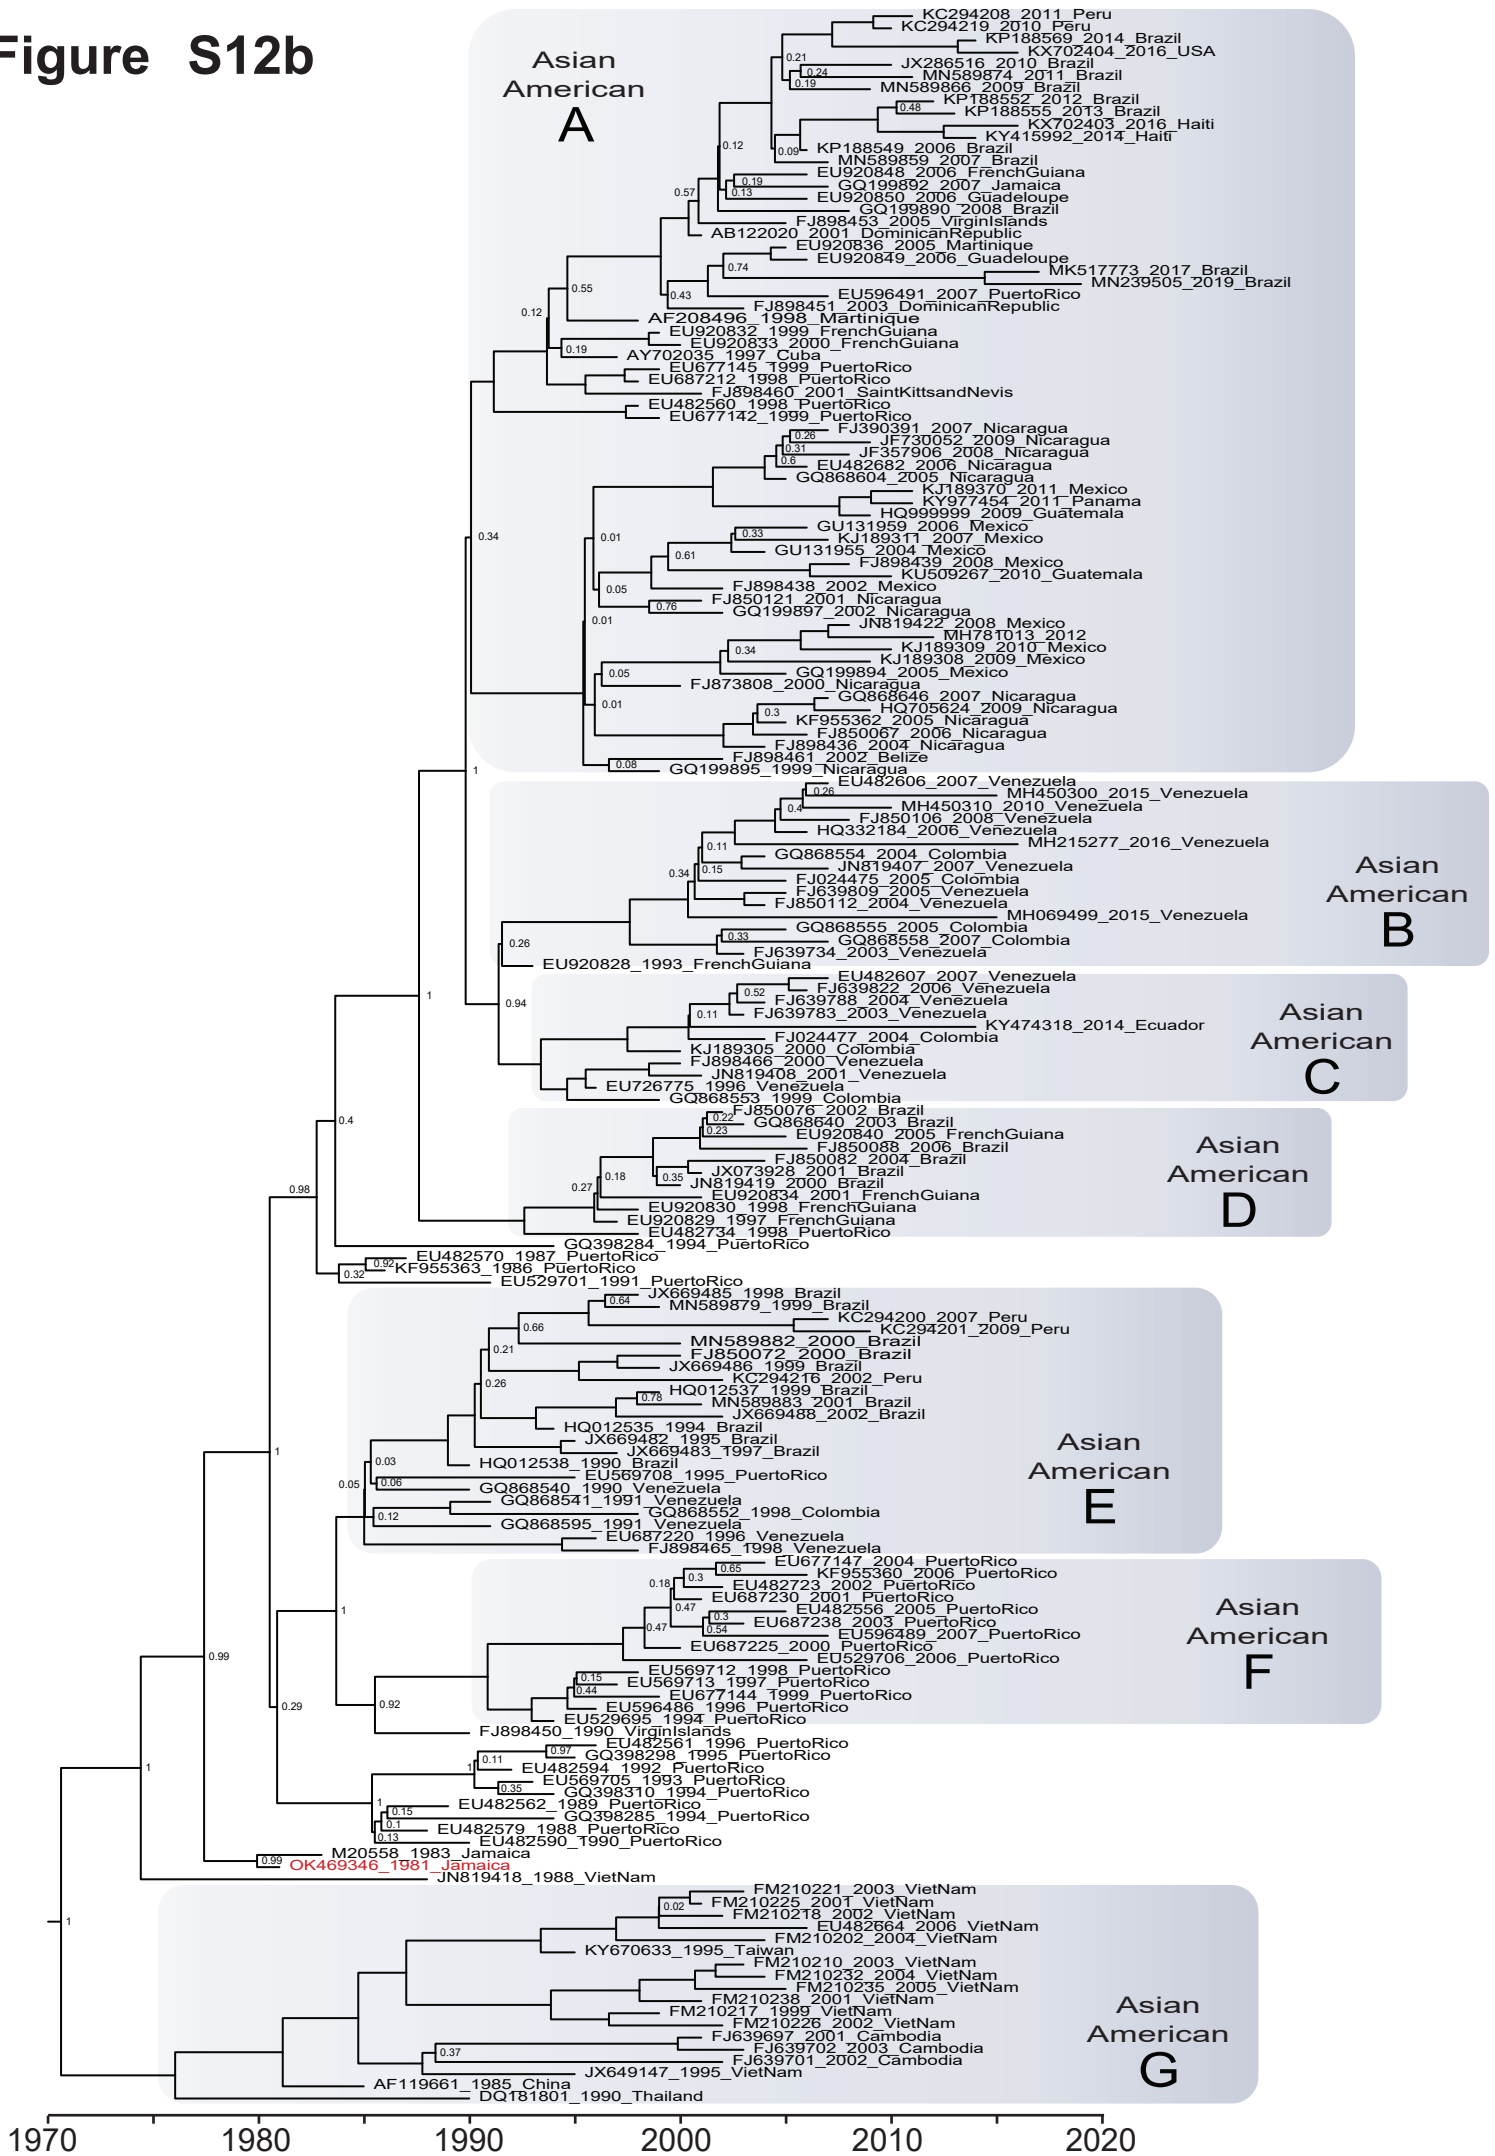

Figure S12c

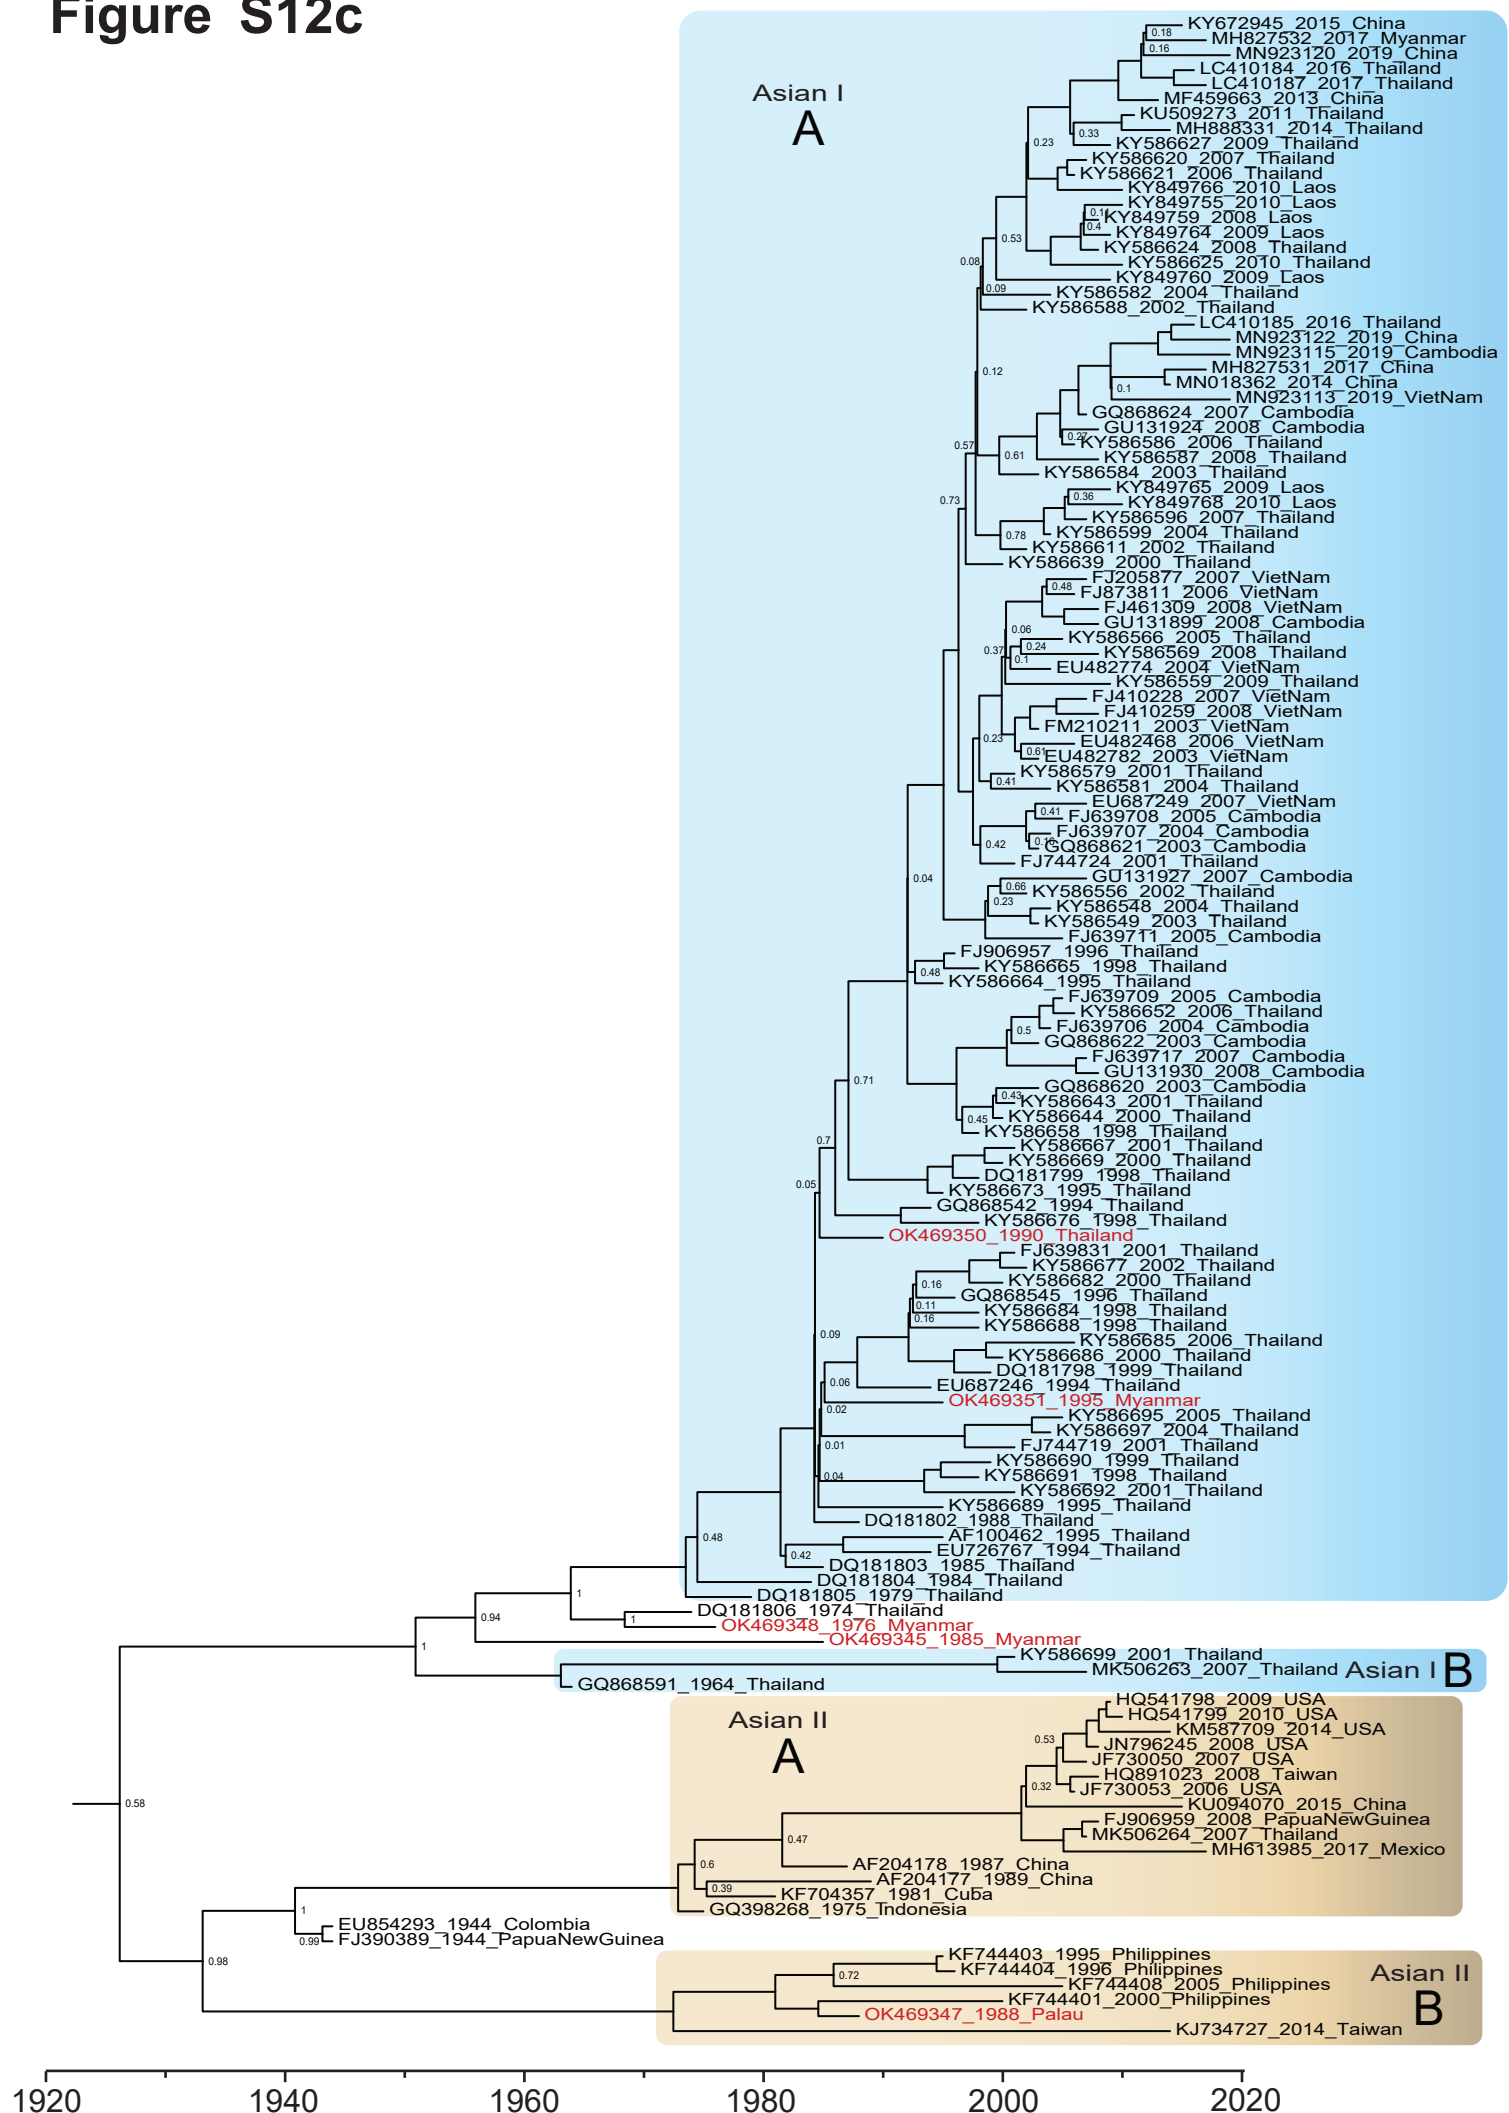

Figure S12d

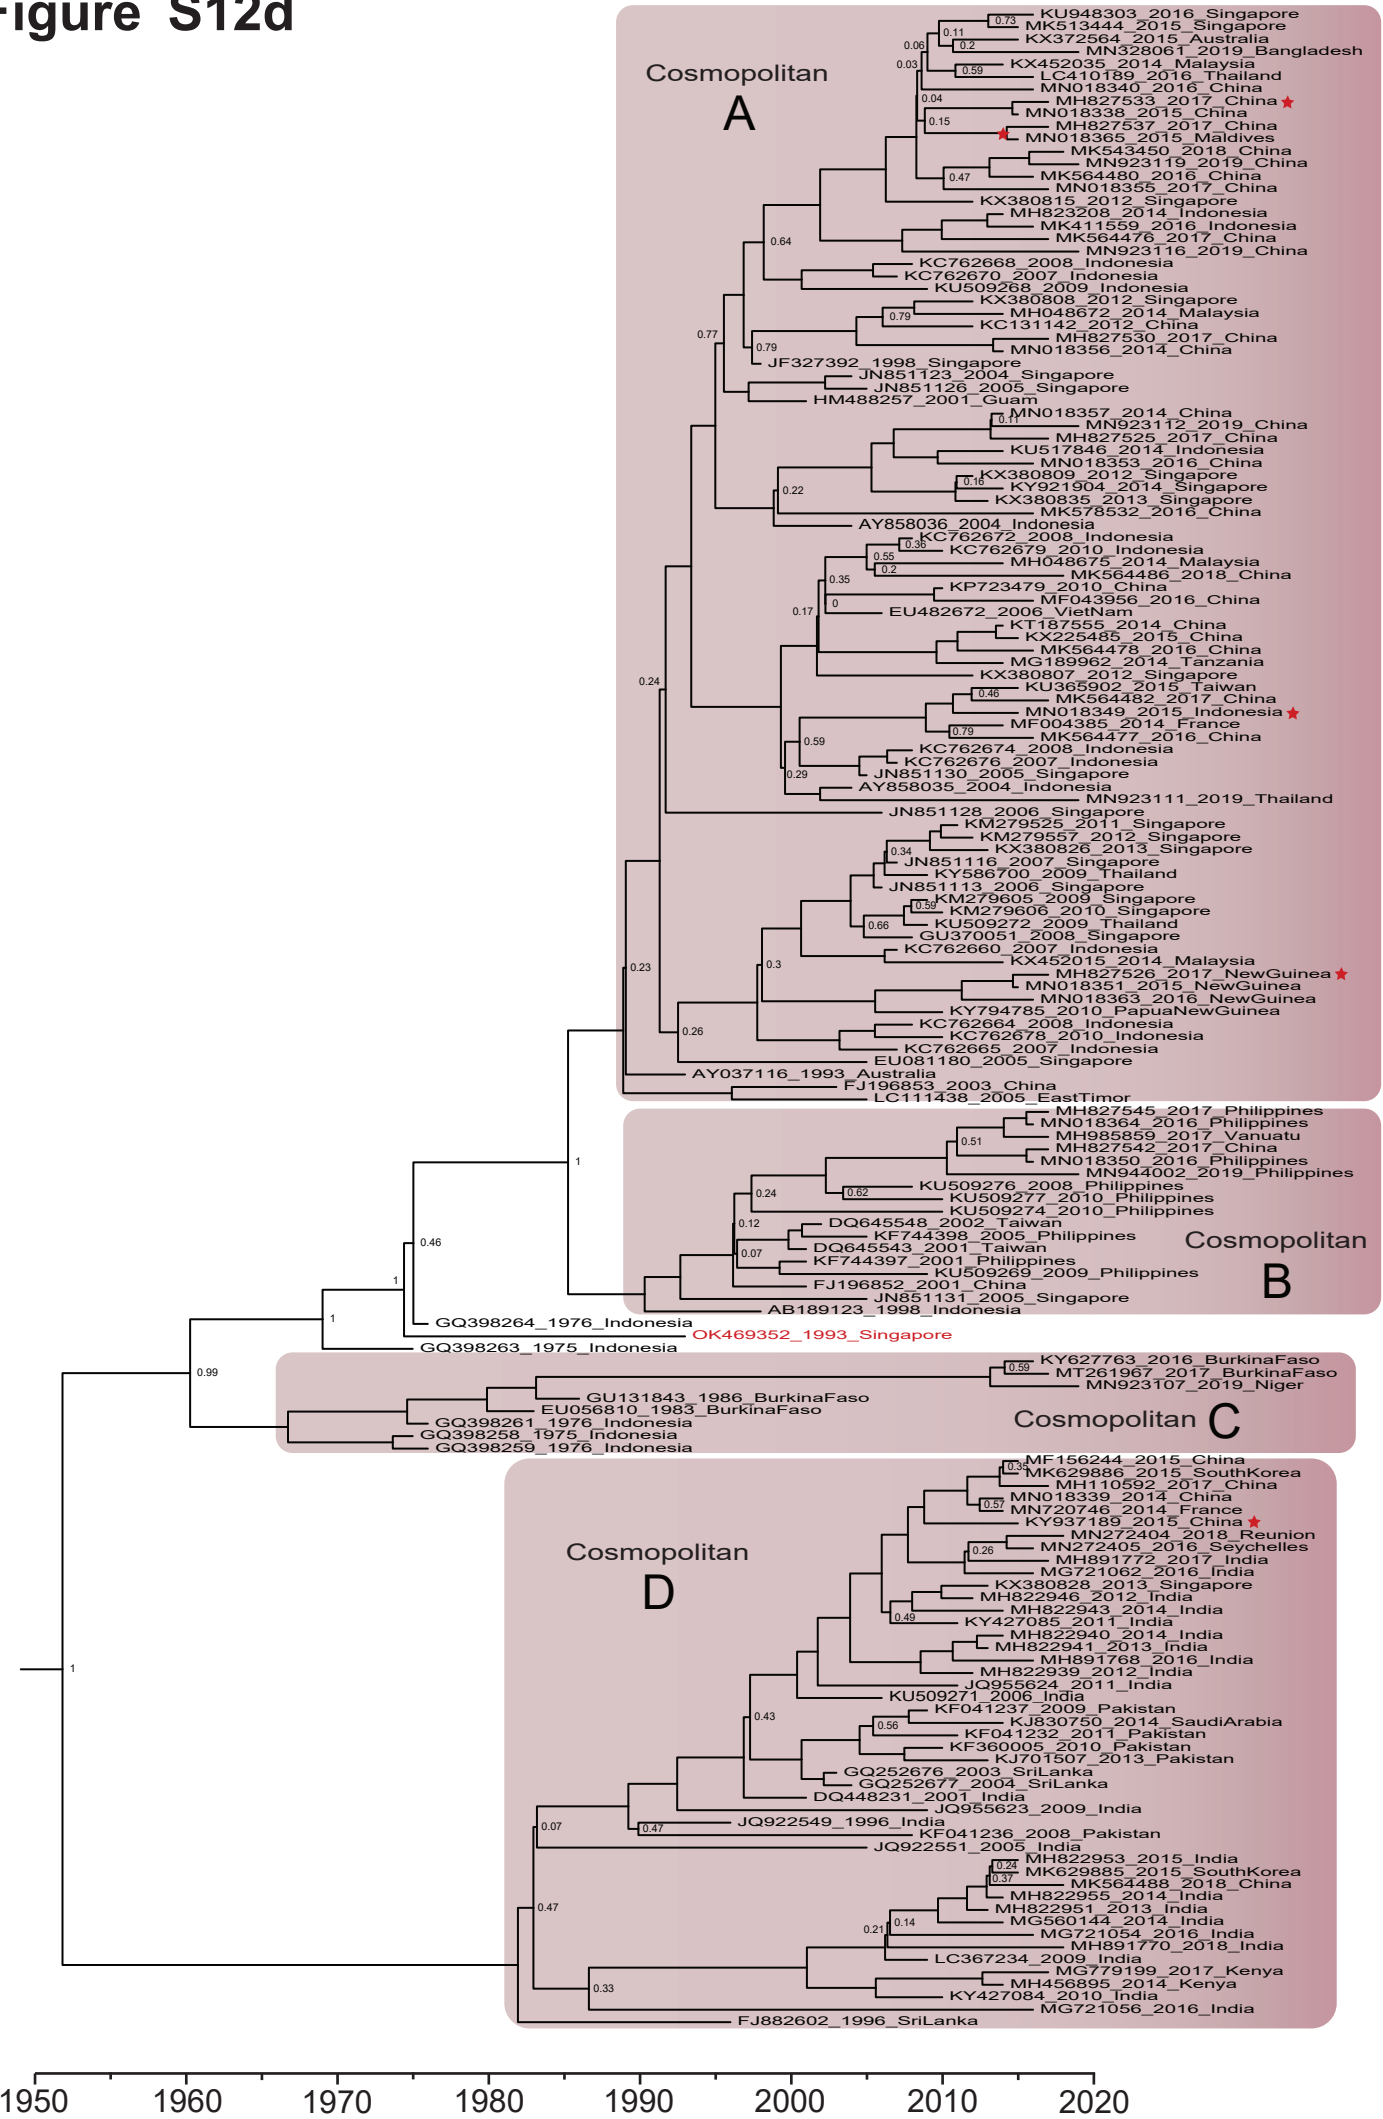

Figure S12e

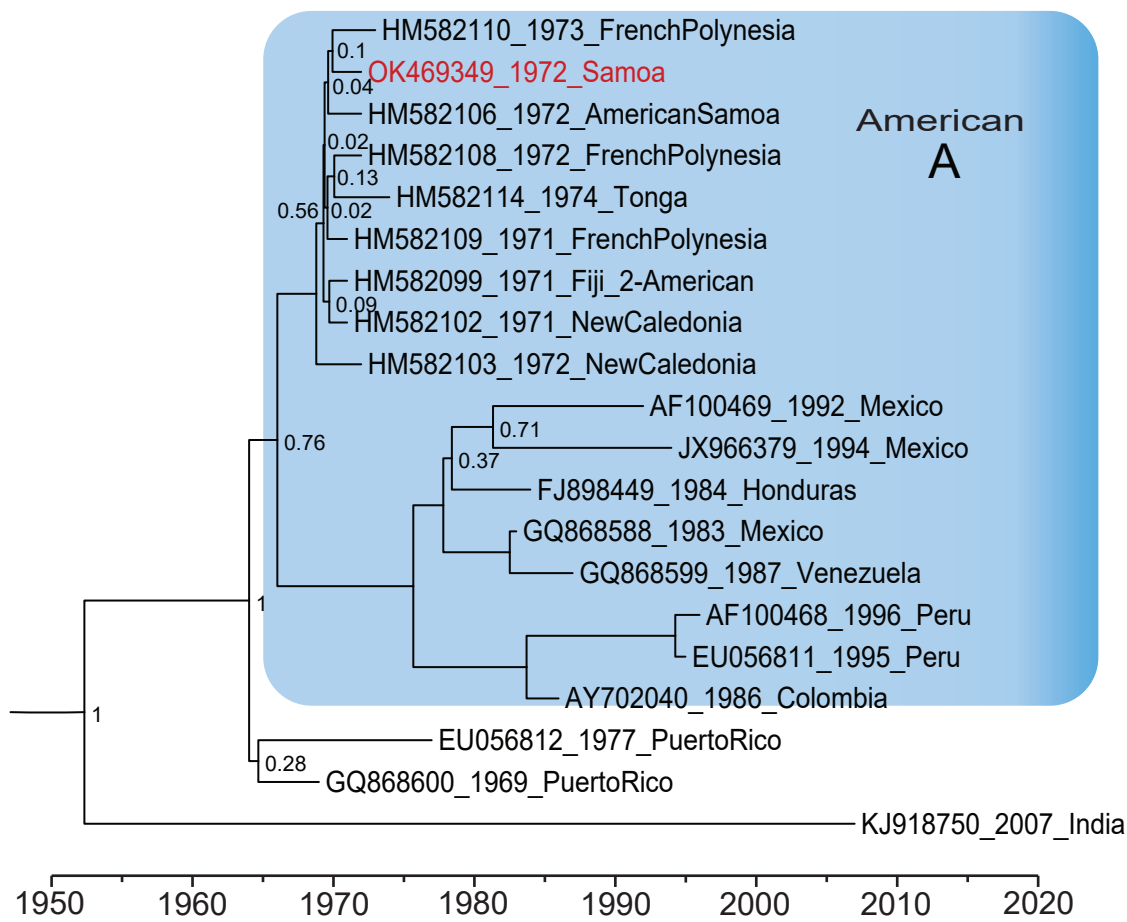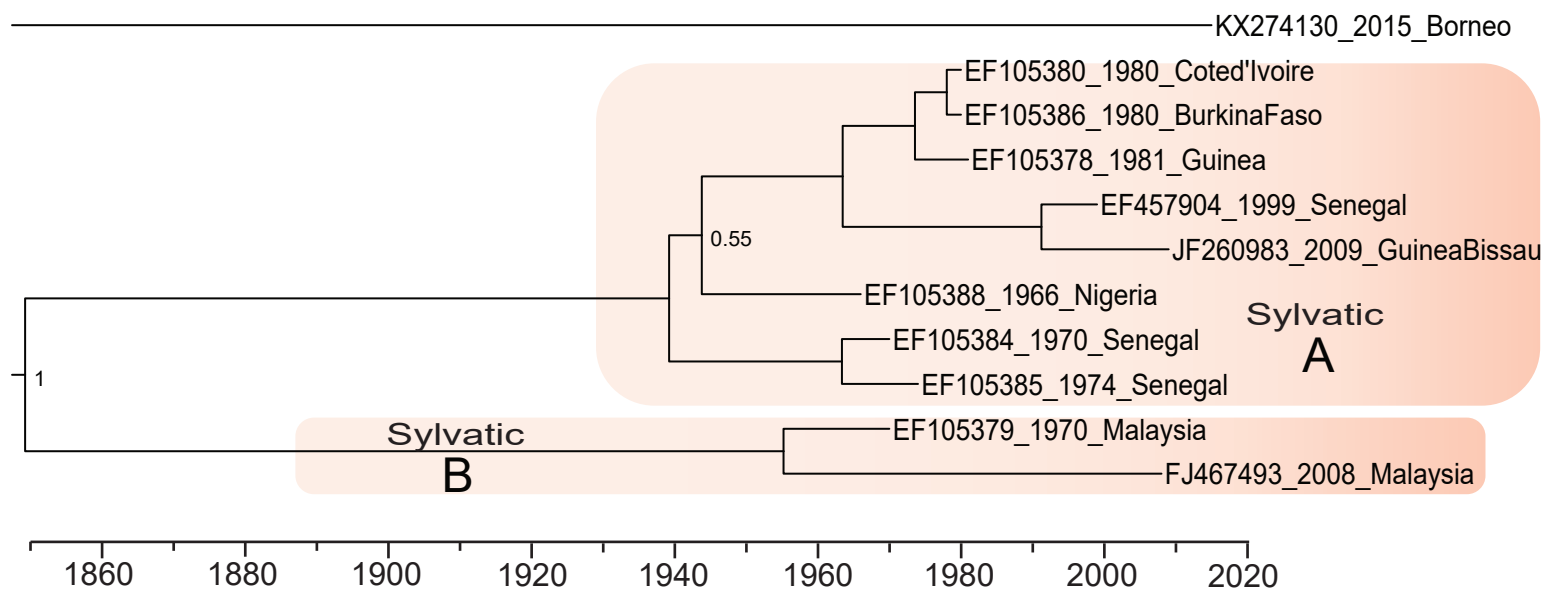

**Supplemental Figure S13: DENV3 Whole Genome Genotypes MCMC Trees.** (a) Genotype 3-III, (b) Genotype 3-II and 3-I. Posterior node support indicated for the major branches. Support values >0.8 have been eliminated in most instances for clarity. Red font indicates newly sequenced isolates from the QUT Arbovirus collection. Branches under positive selection (see section 3.2.2) are indicated by a red star. Scale axis is representative of calendar years.



**Figure S13a**

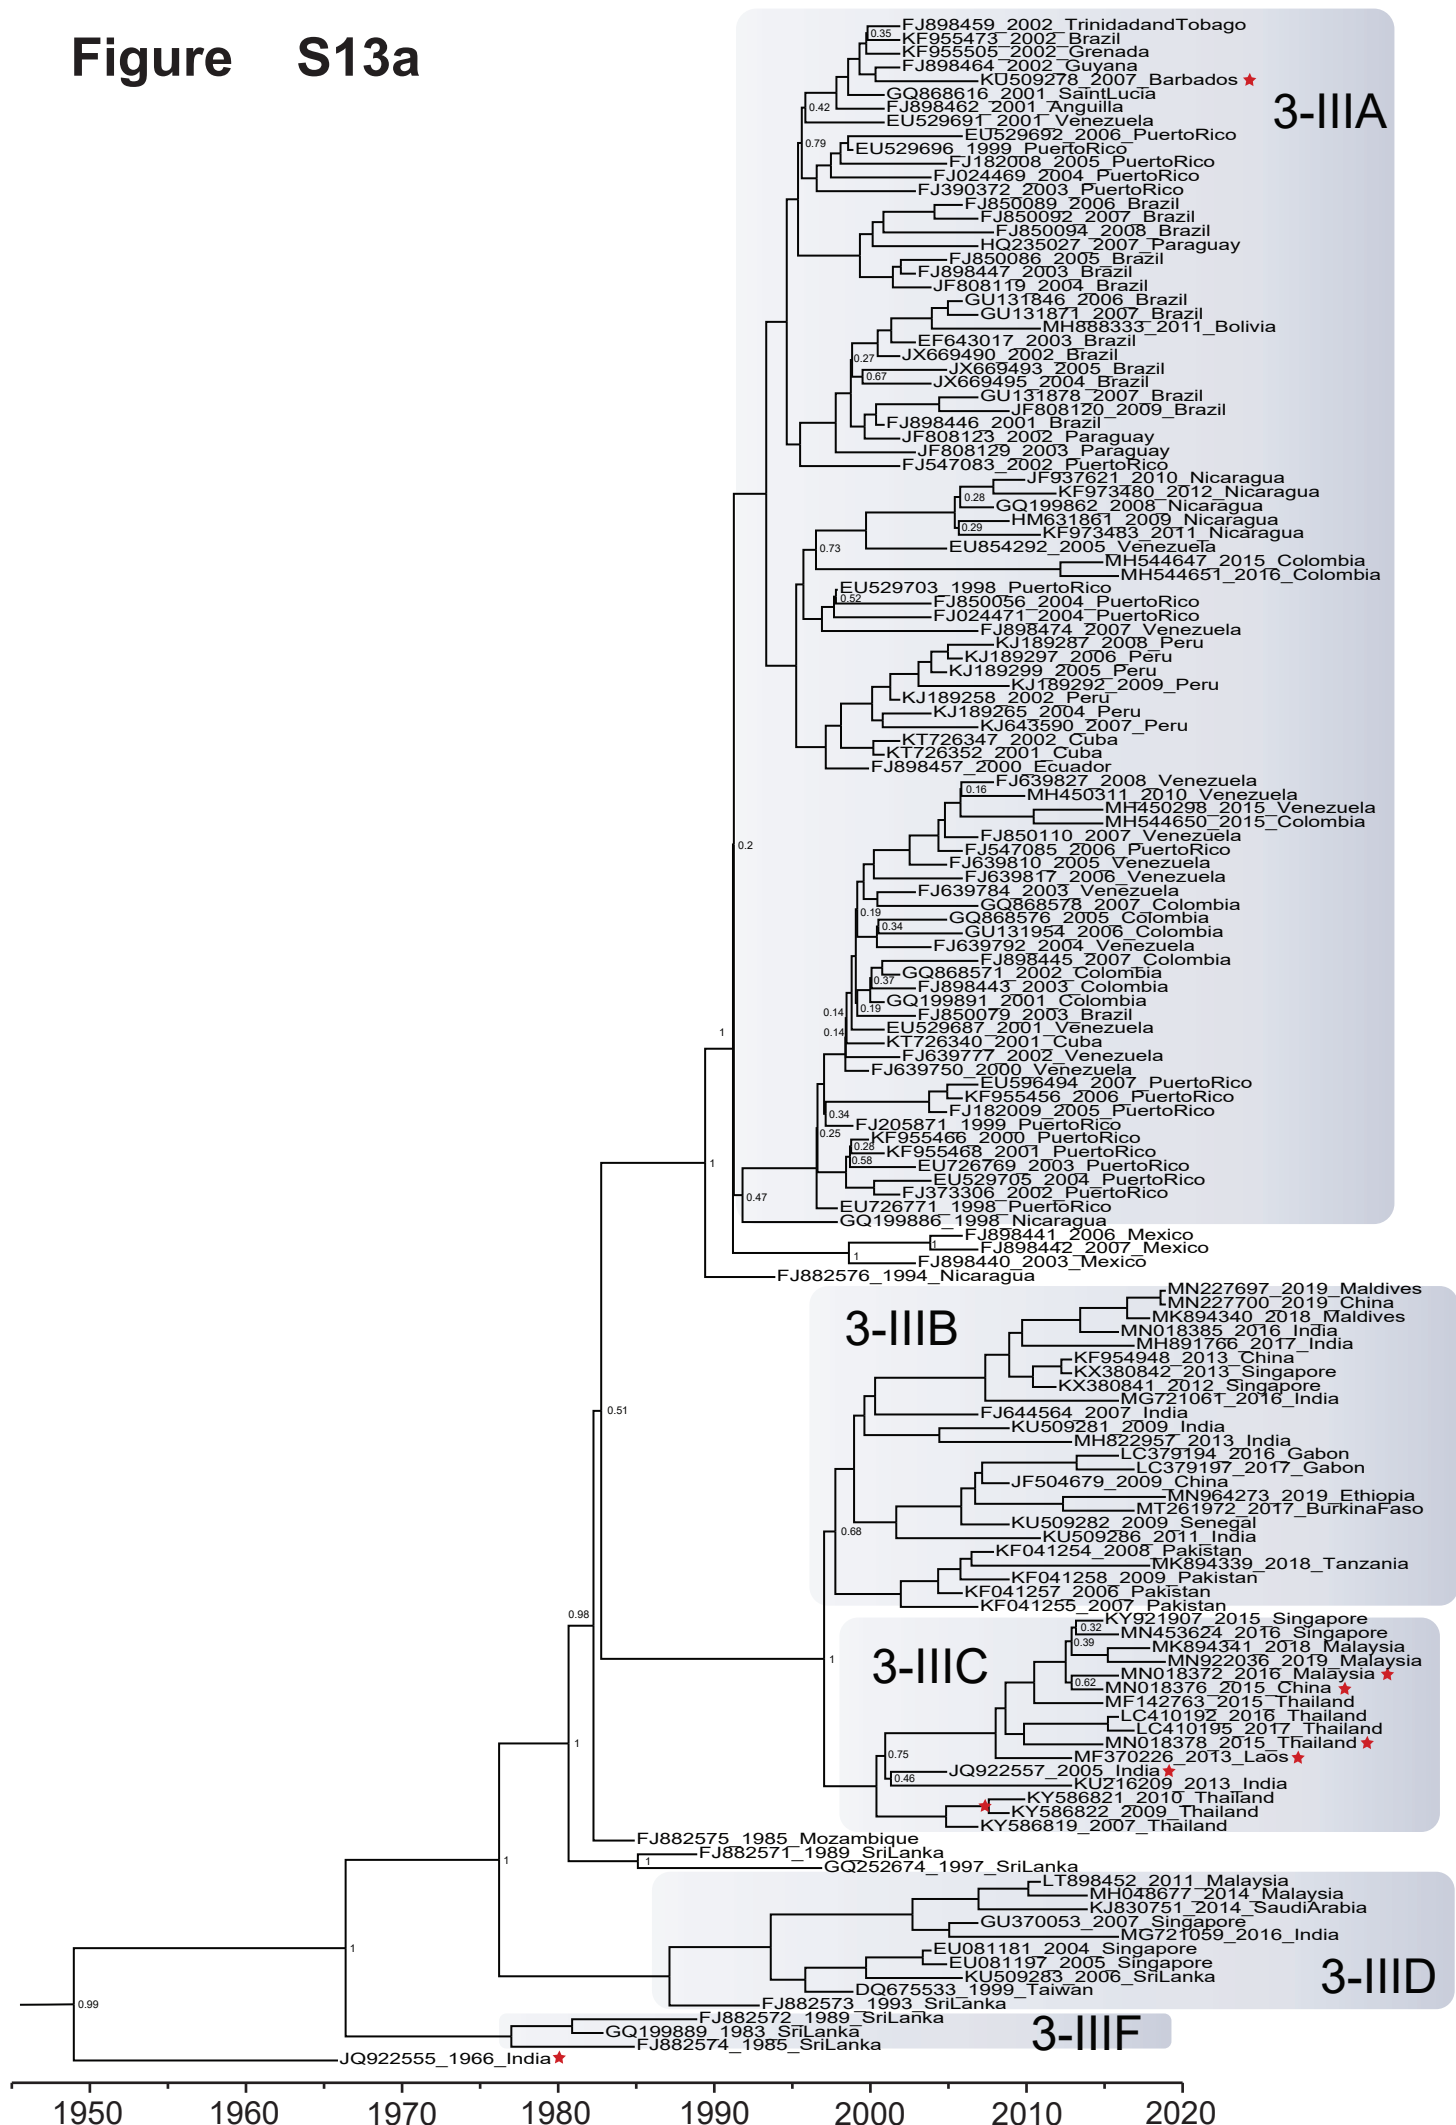

Figure S13b

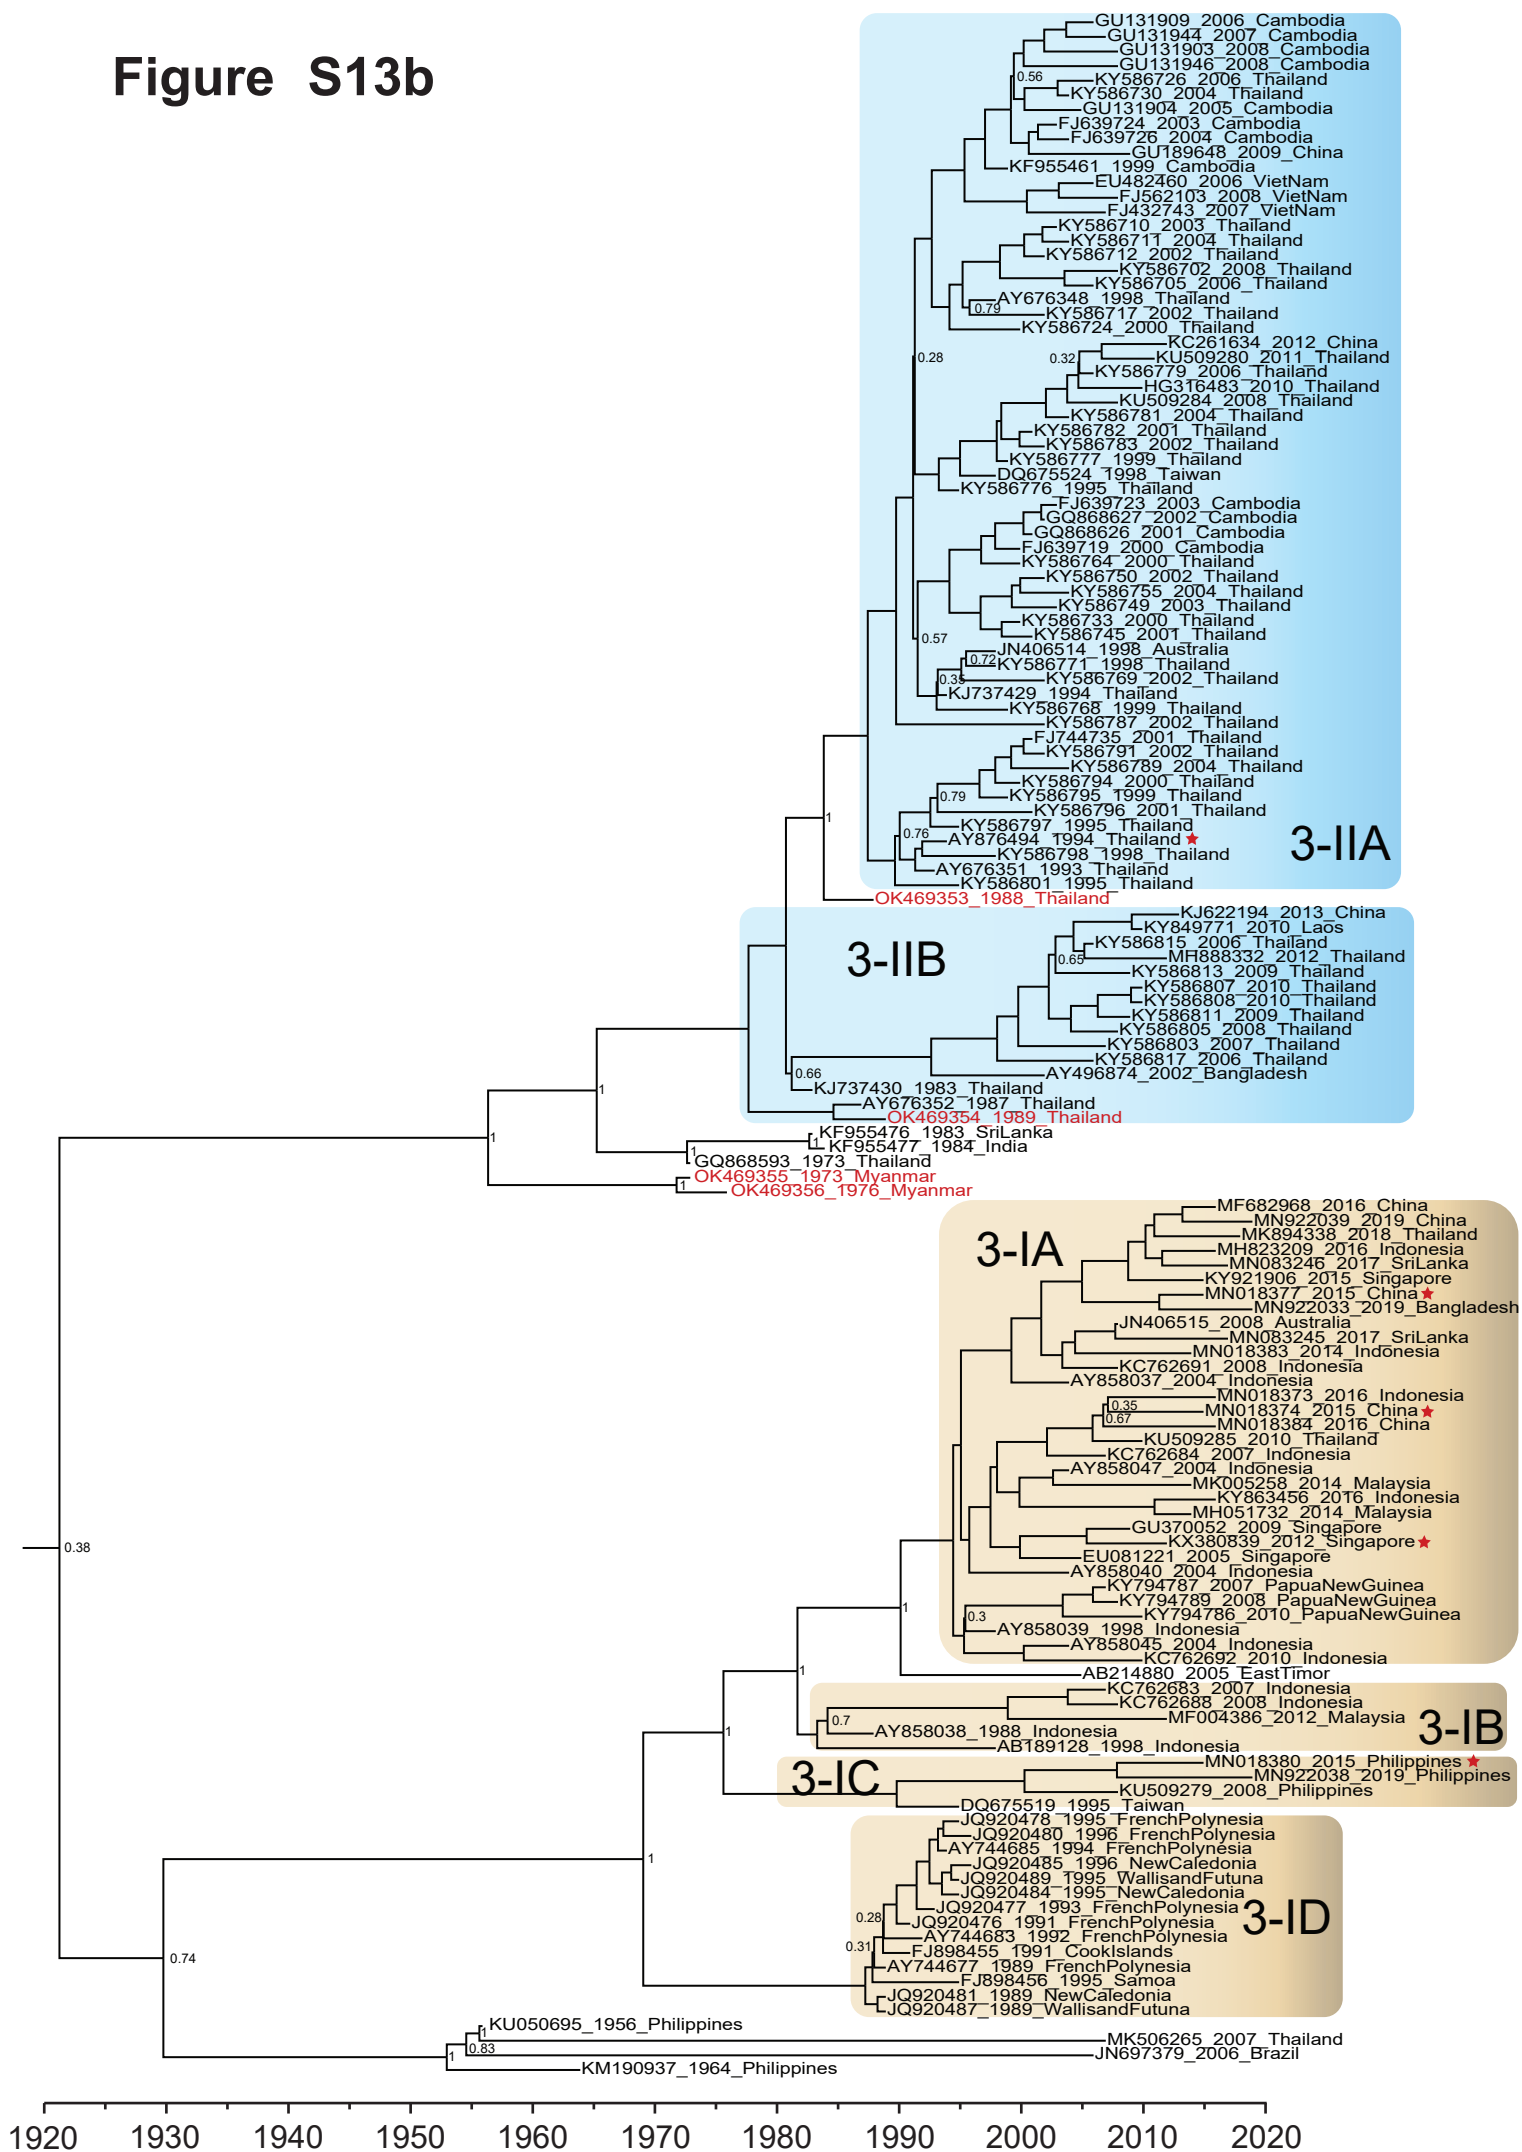



**Supplemental Figure S14: DENV3 E Gene MCMC Trees.** (a) DENV3 E gene MCMC tree, (b) Genotype 3-I, (c) Genotypes 3-III and 3-II. Posterior node support indicated for the major branches. Support values >0.8 have been eliminated in most instances for clarity. Red circles/font indicates newly sequenced isolates from the QUT Arbovirus collection. Branches under positive selection (see section 3.2.2) are indicated by a red star. Scale axis is representative of calendar years.

Figure S14a

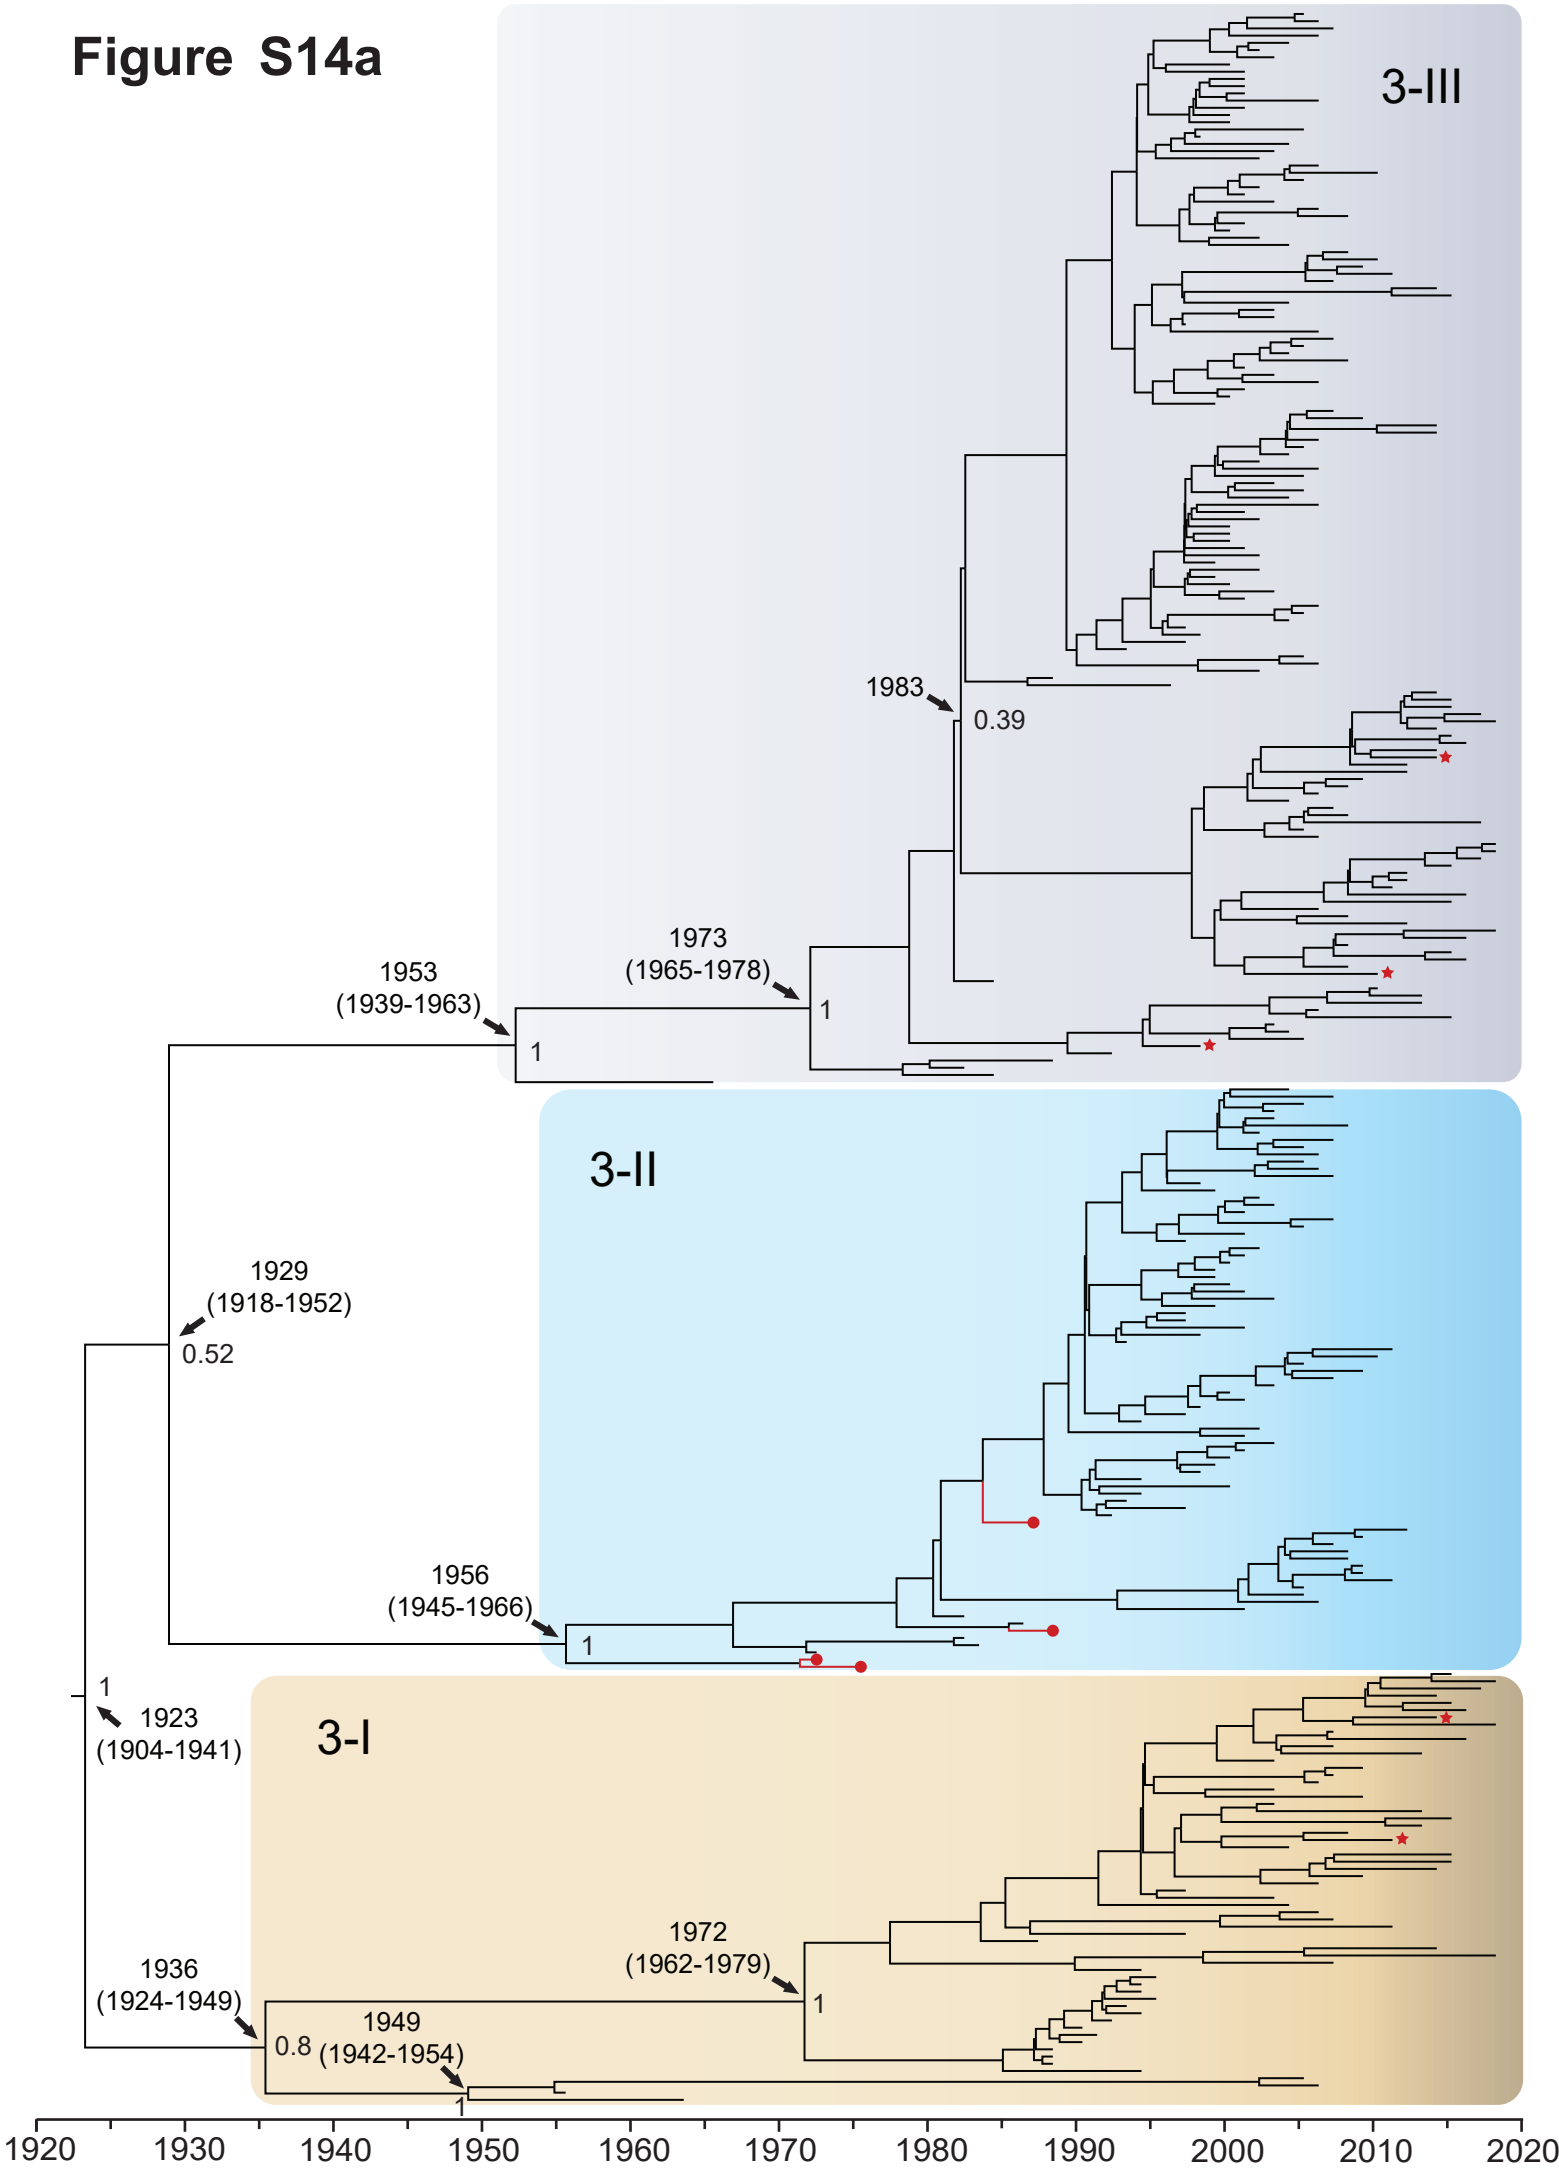

Figure S14b

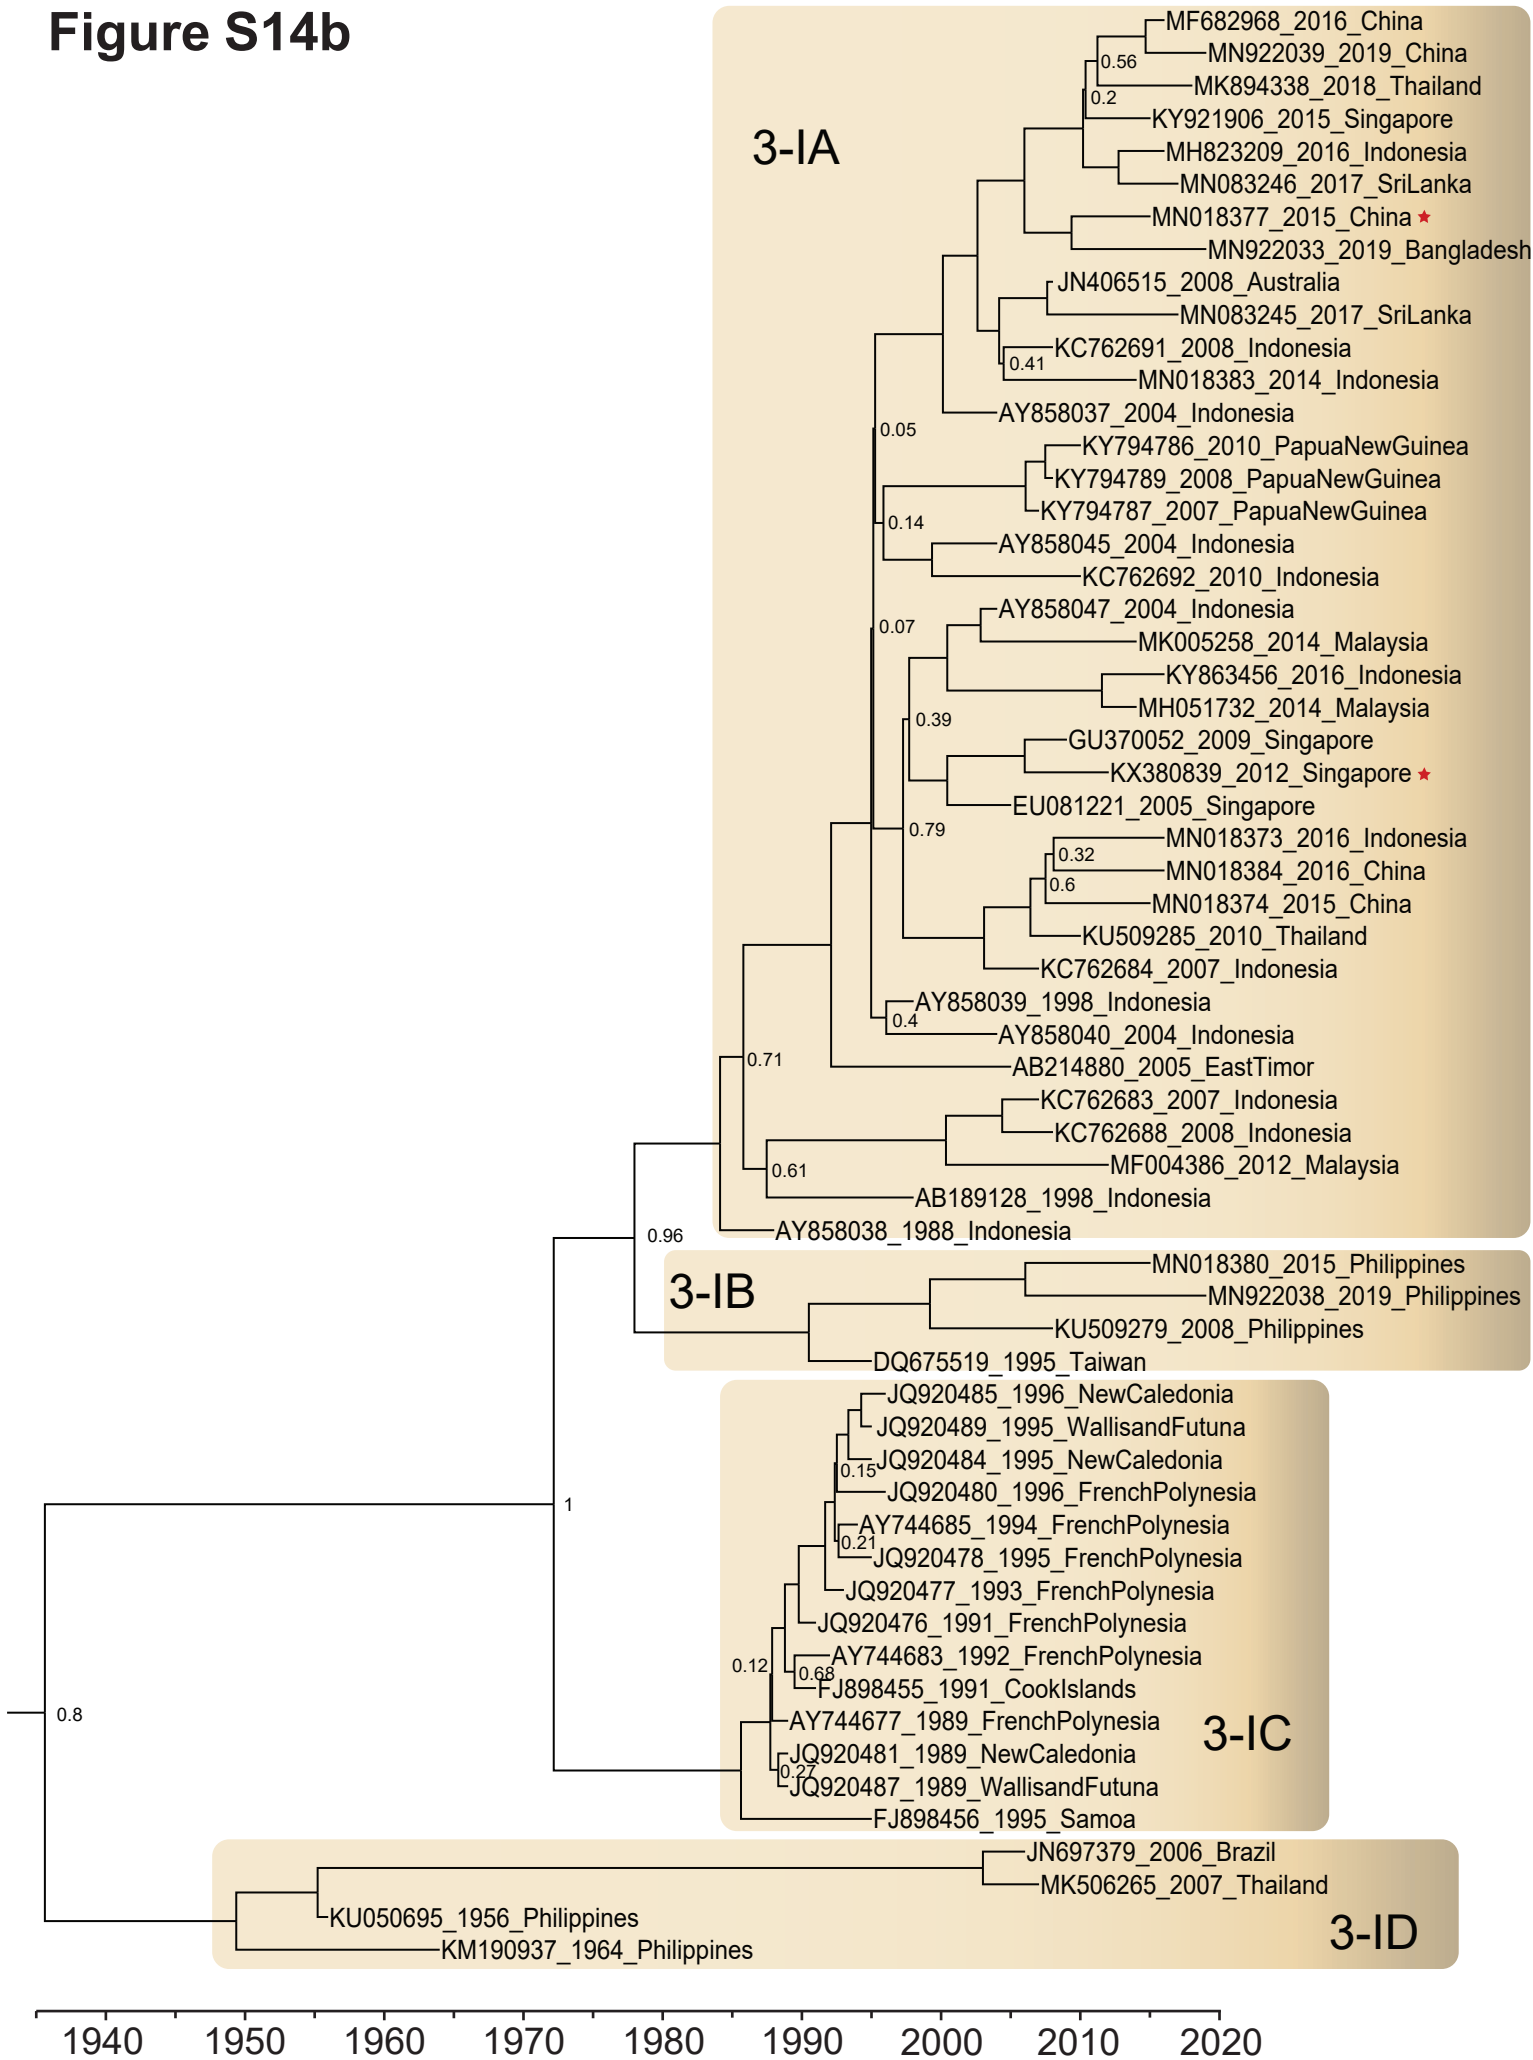

Figure S14c

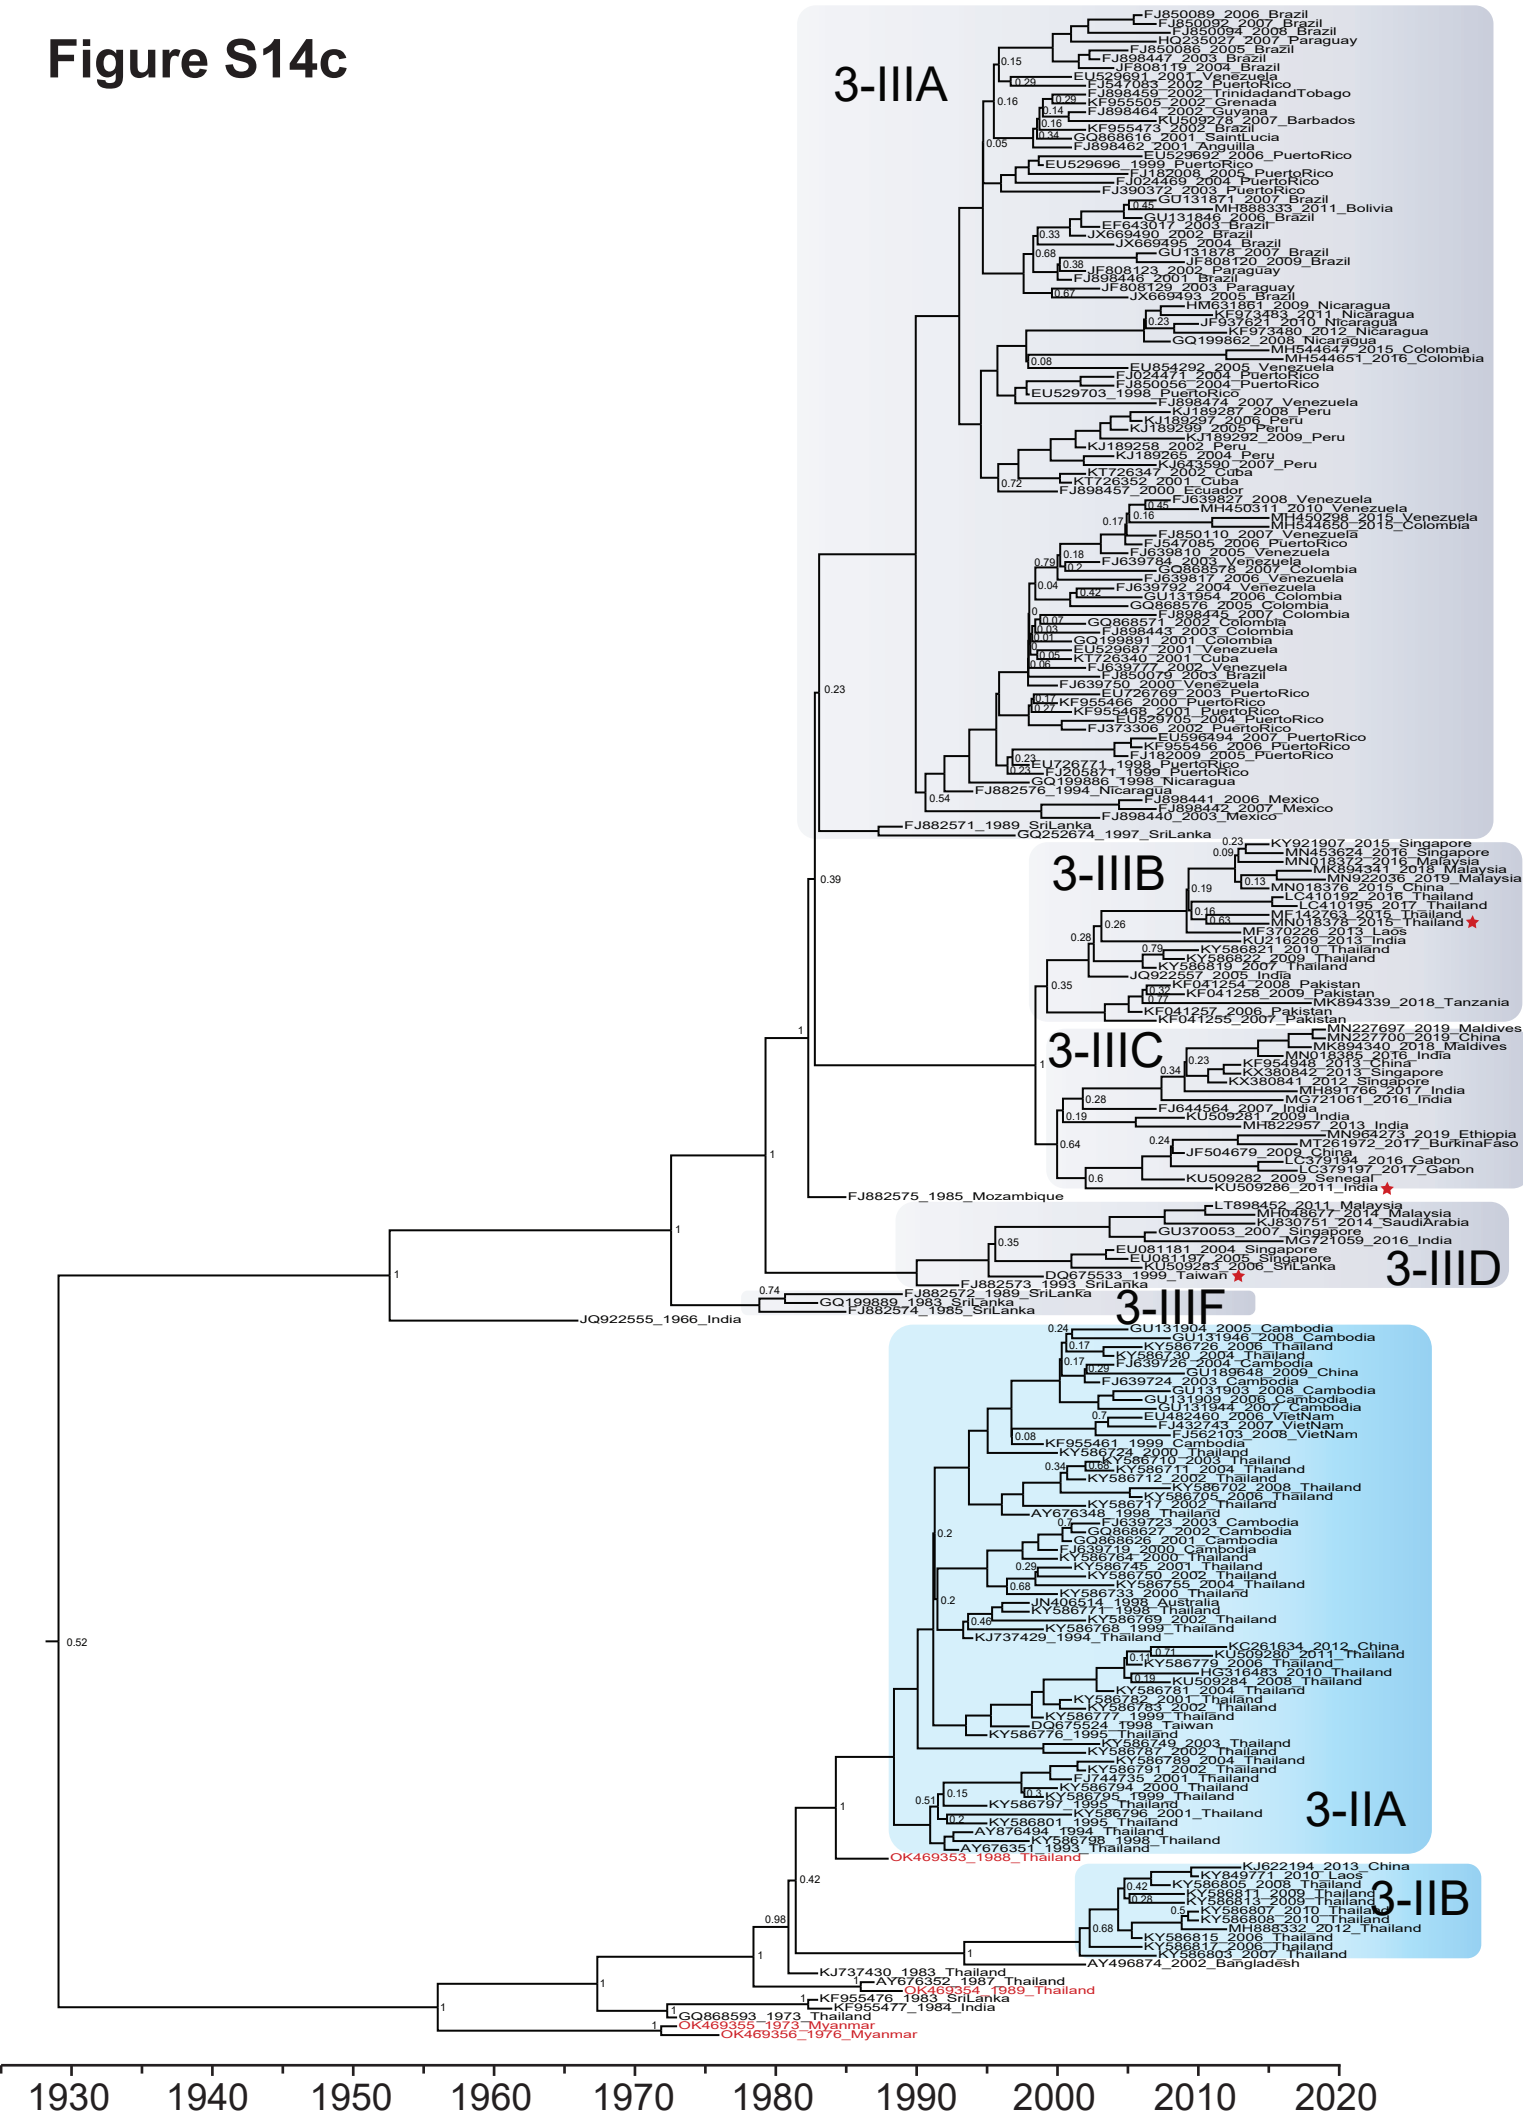

**Supplemental Figure S15: DENV4 Whole Genome Genotypes MCMC Trees.** (a) Genotype 4-II, (b) Genotypes 4-I, 4-III, and sylvatic. Posterior node support indicated for the major branches. Support values >0.8 have been eliminated in most instances for clarity. Red font indicates newly sequenced isolates from the QUT Arbovirus collection. Branches under positive selection (see section 3.2.2) are indicated by a red star. Scale axis is representative of calendar years.

Figure S15a

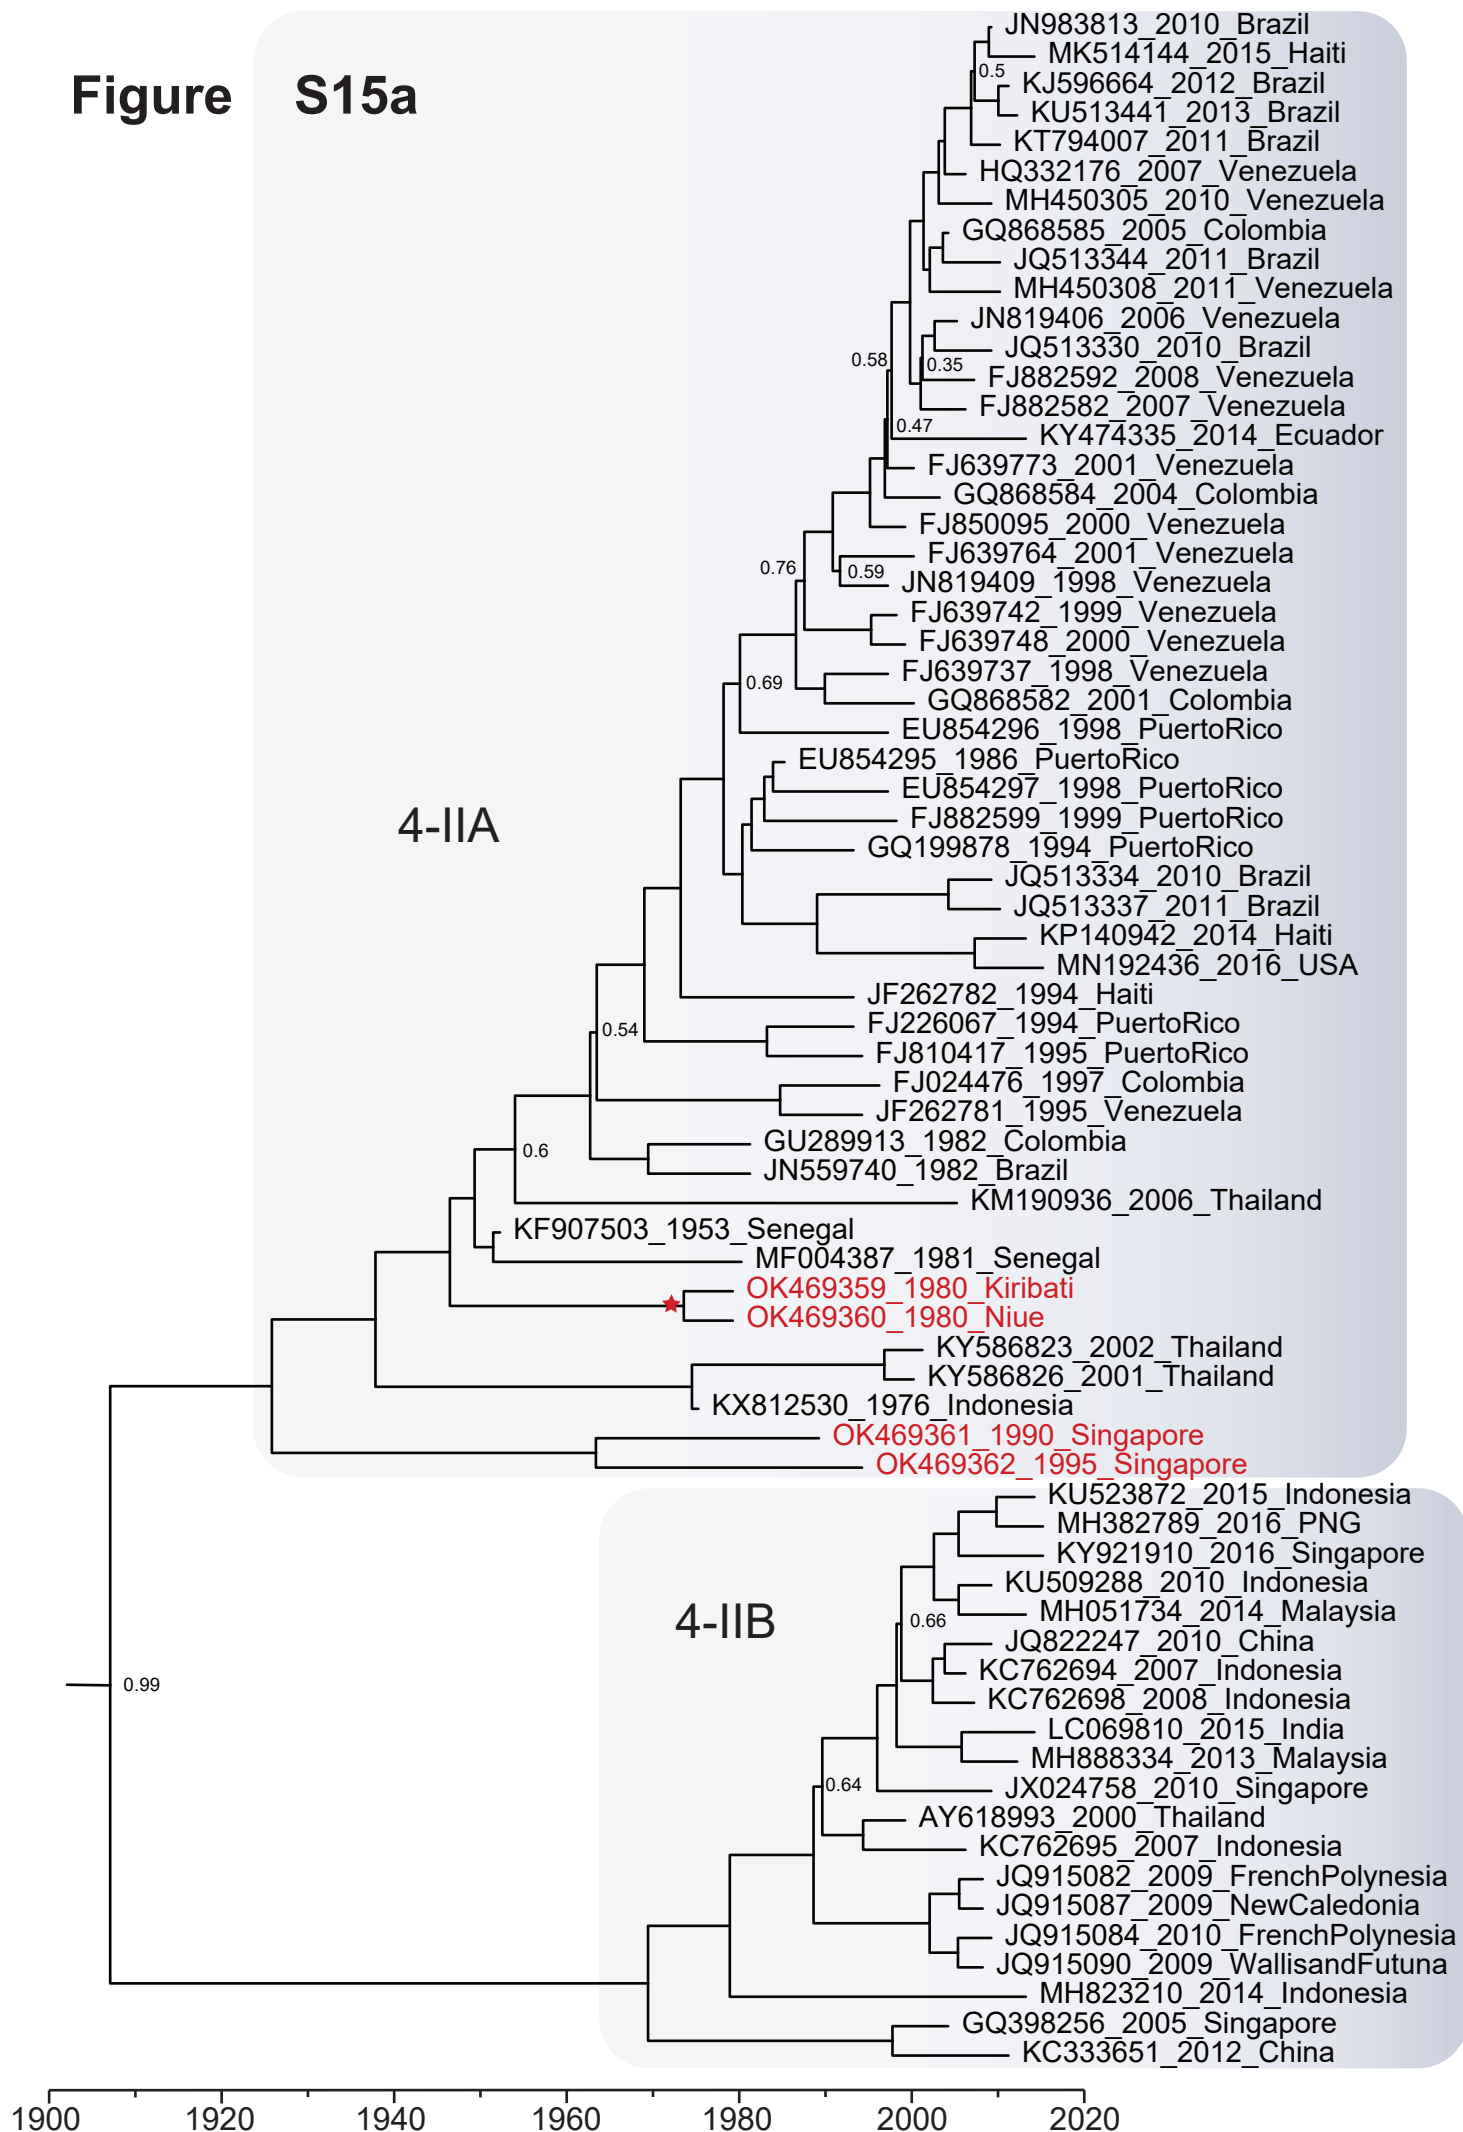

Figure S15b

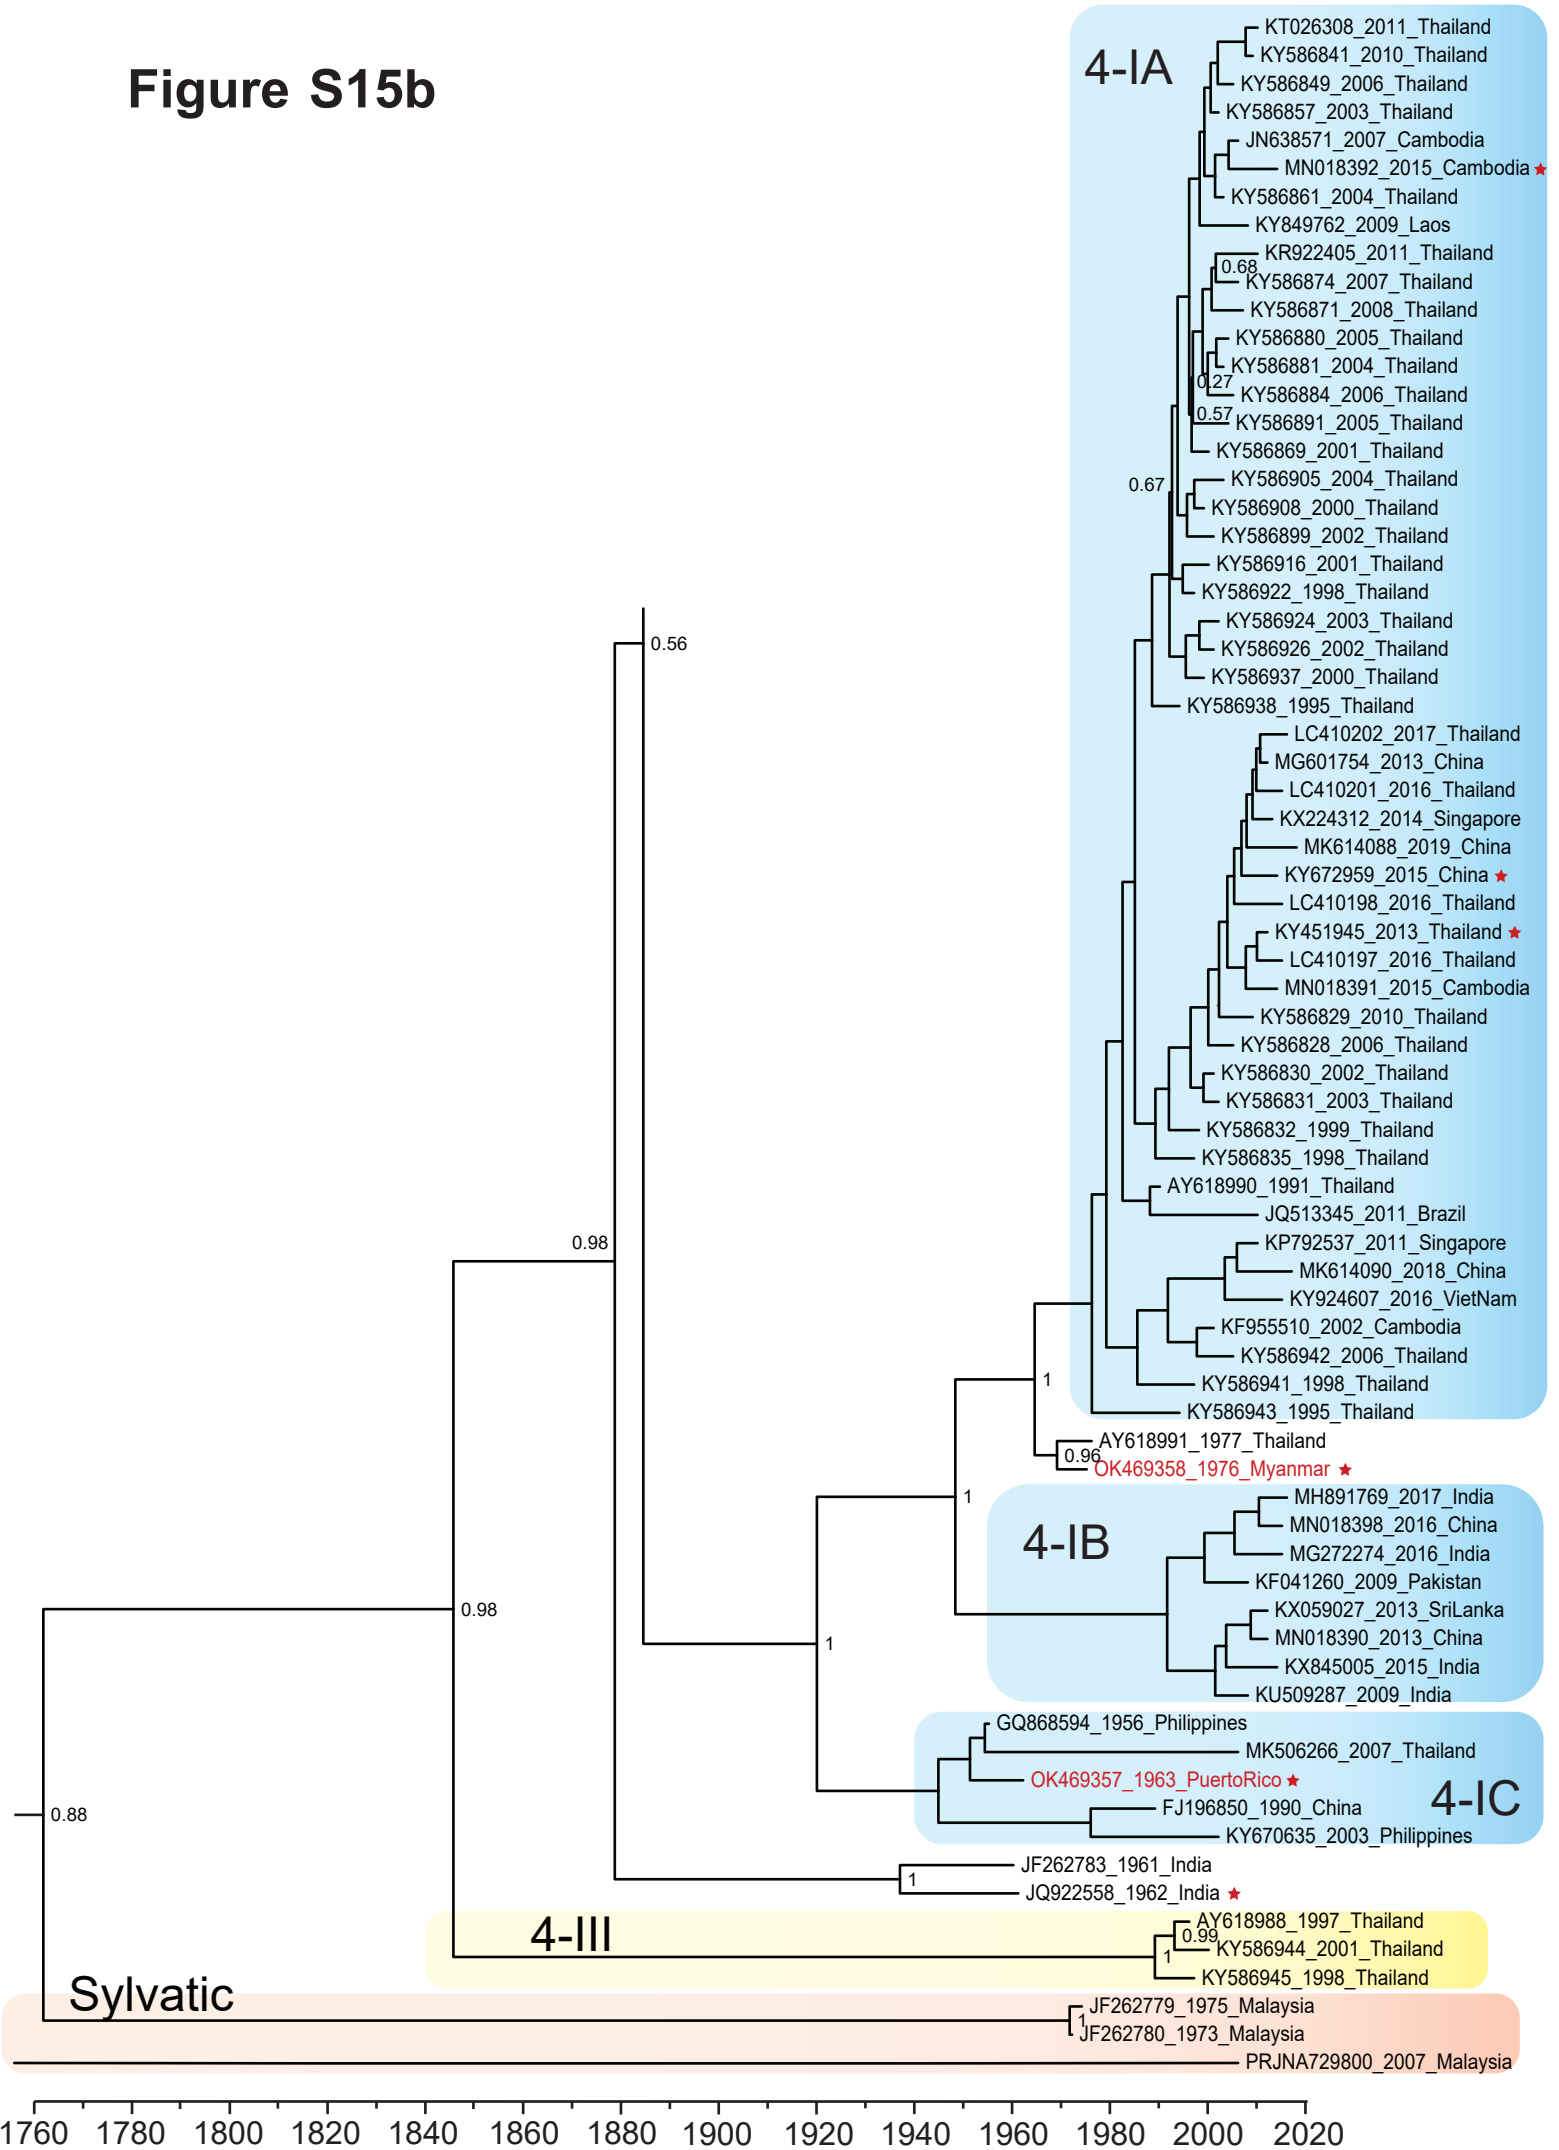

**Supplemental Figure S16: DENV4 E Gene MCMC Trees.** (a) DENV4 E gene MCMC tree, (b) Genotype 4-II, (c) Genotypes 4-I, 4-III, and sylvatic. Posterior node support indicated for the major branches. Support values >0.8 have been eliminated in most instances for clarity. Red circles/font indicates newly sequenced isolates from the QUT Arbovirus collection. Branches under positive selection (see section 3.2.2) are indicated by a red star. Scale axis is representative of calendar years.



Figure S16a

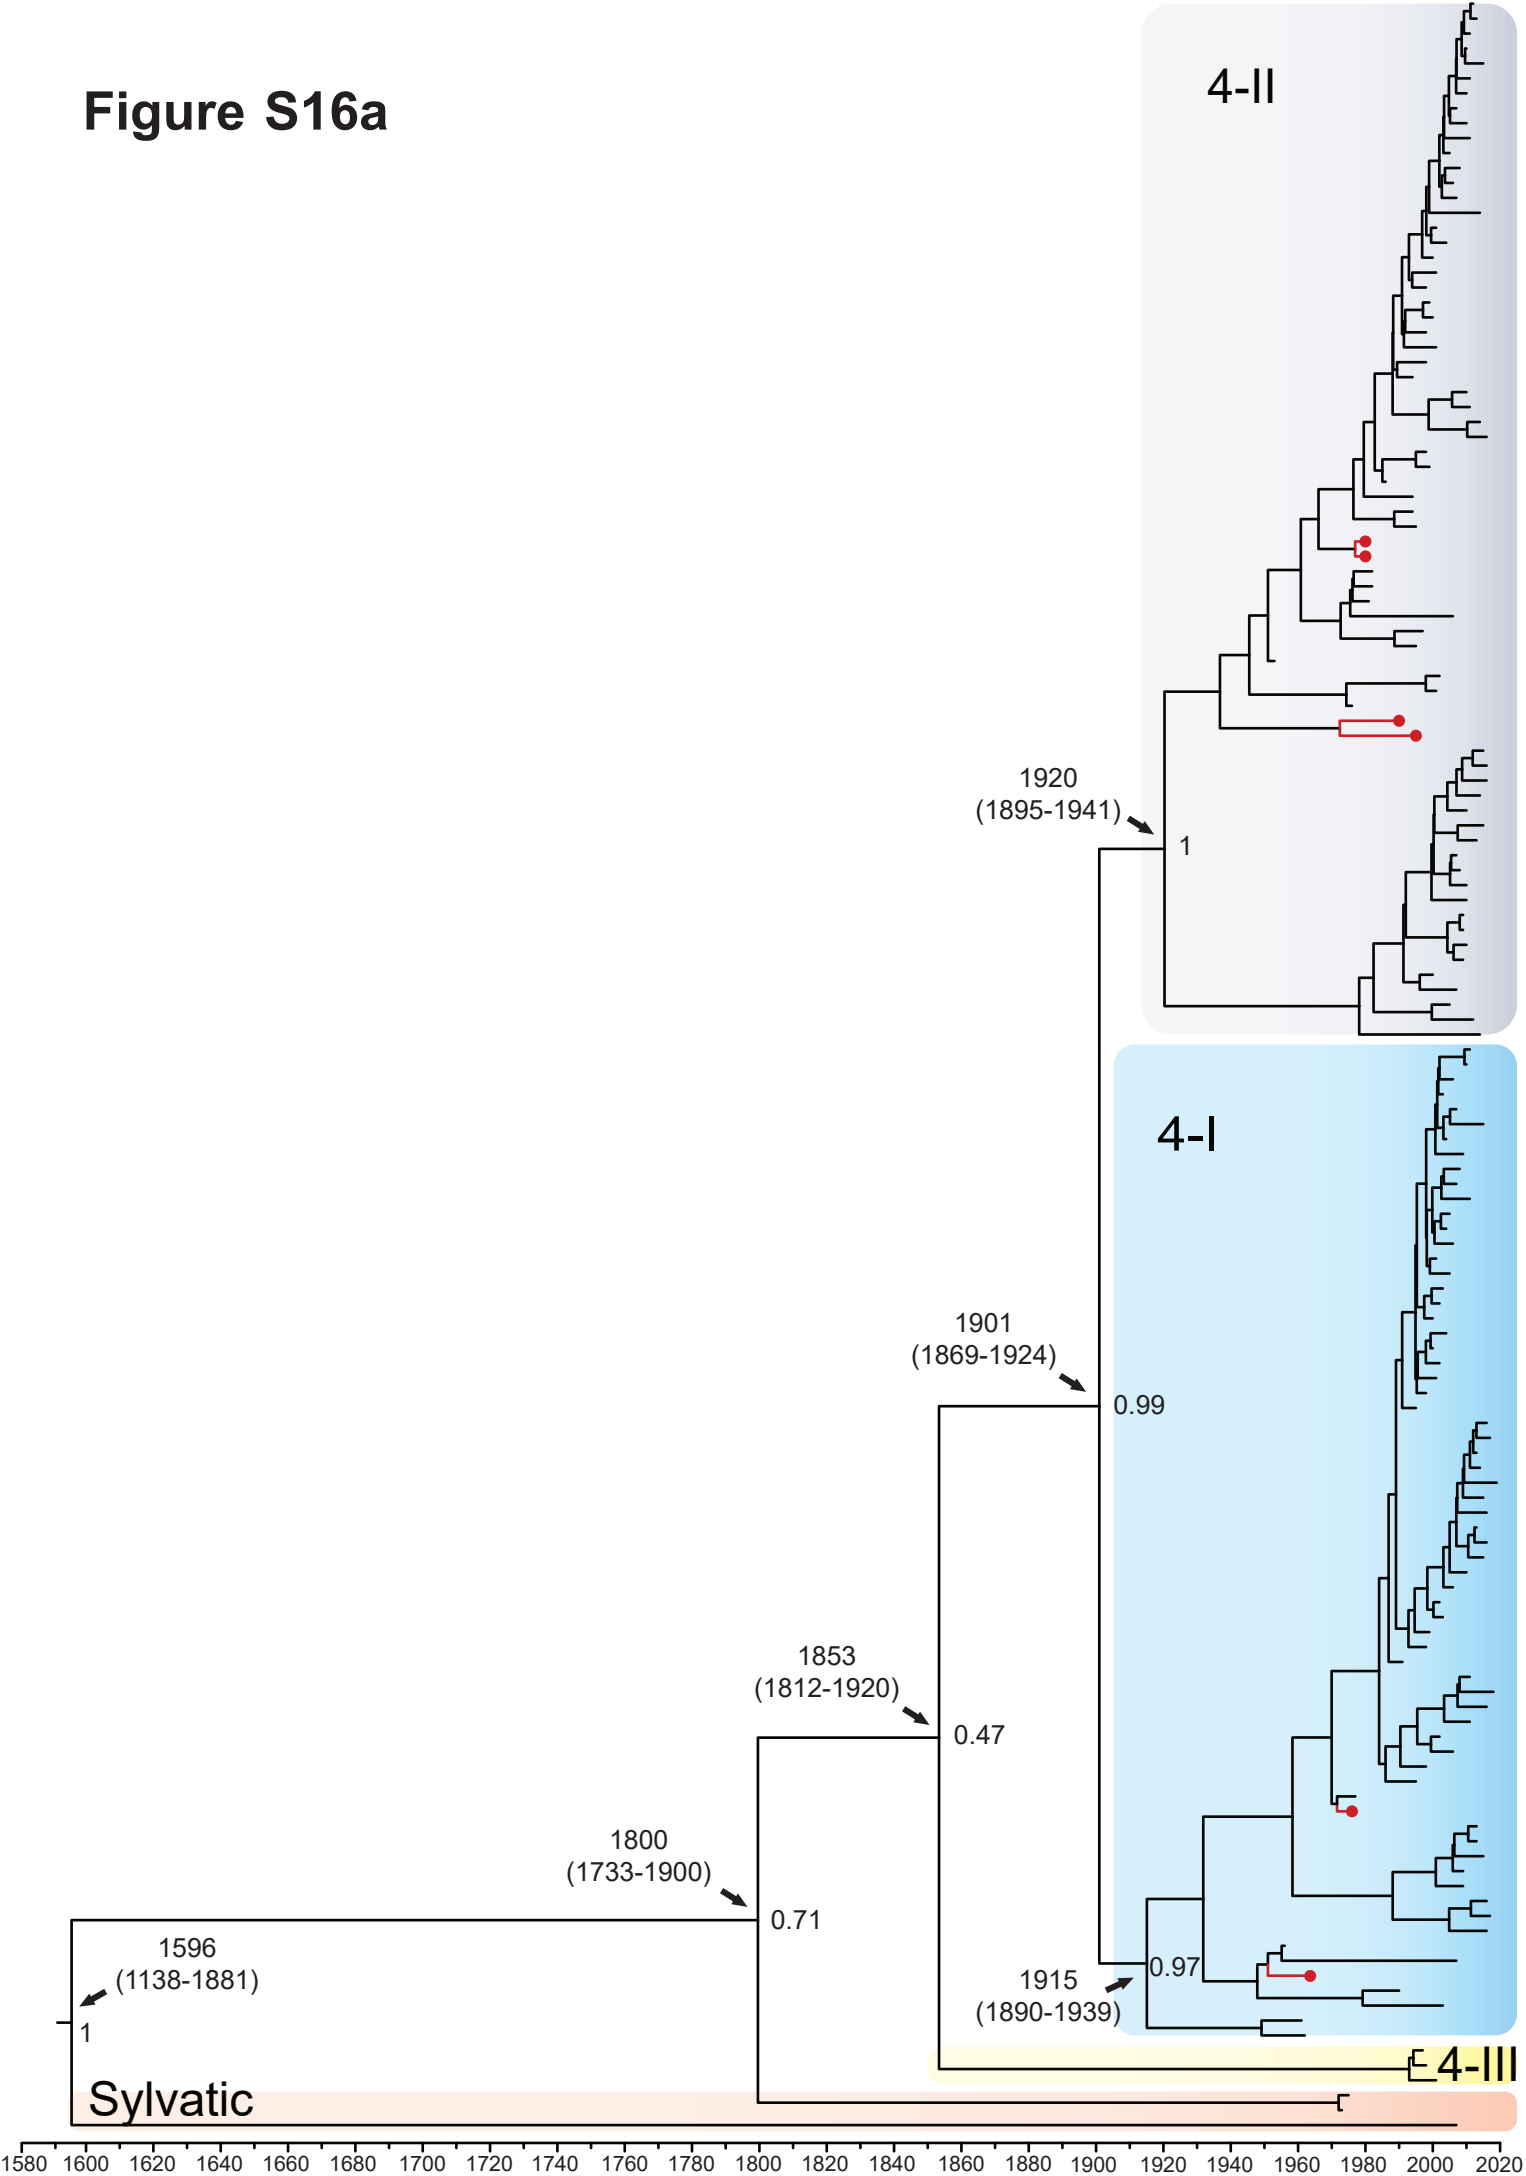

Figure S16b

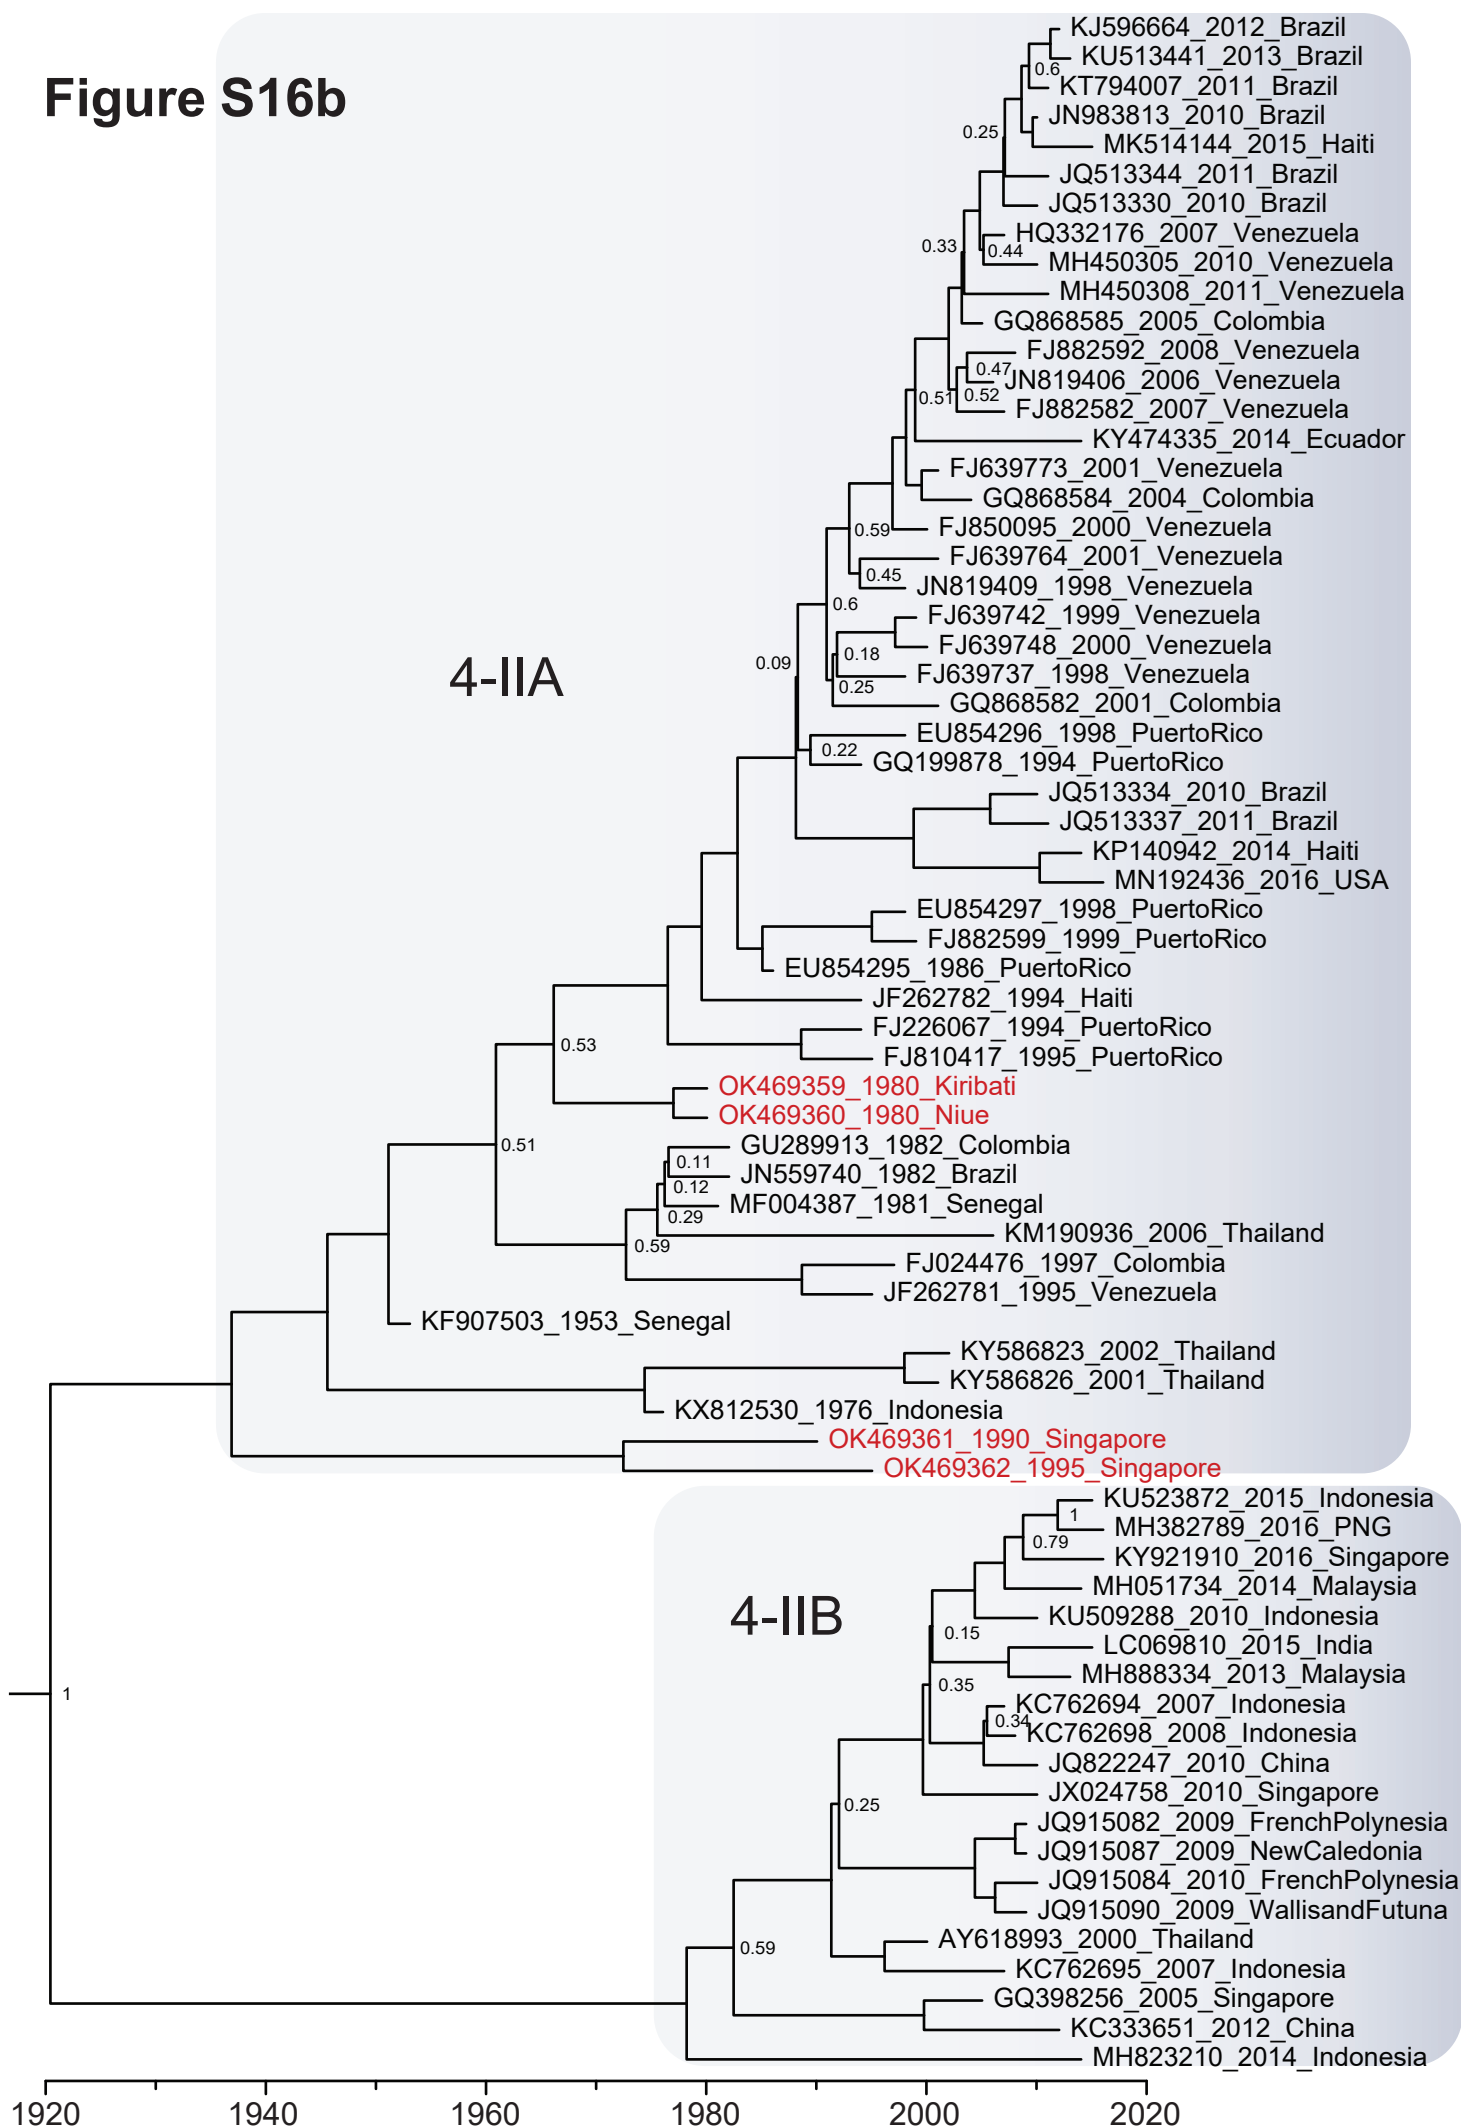

Figure S16c

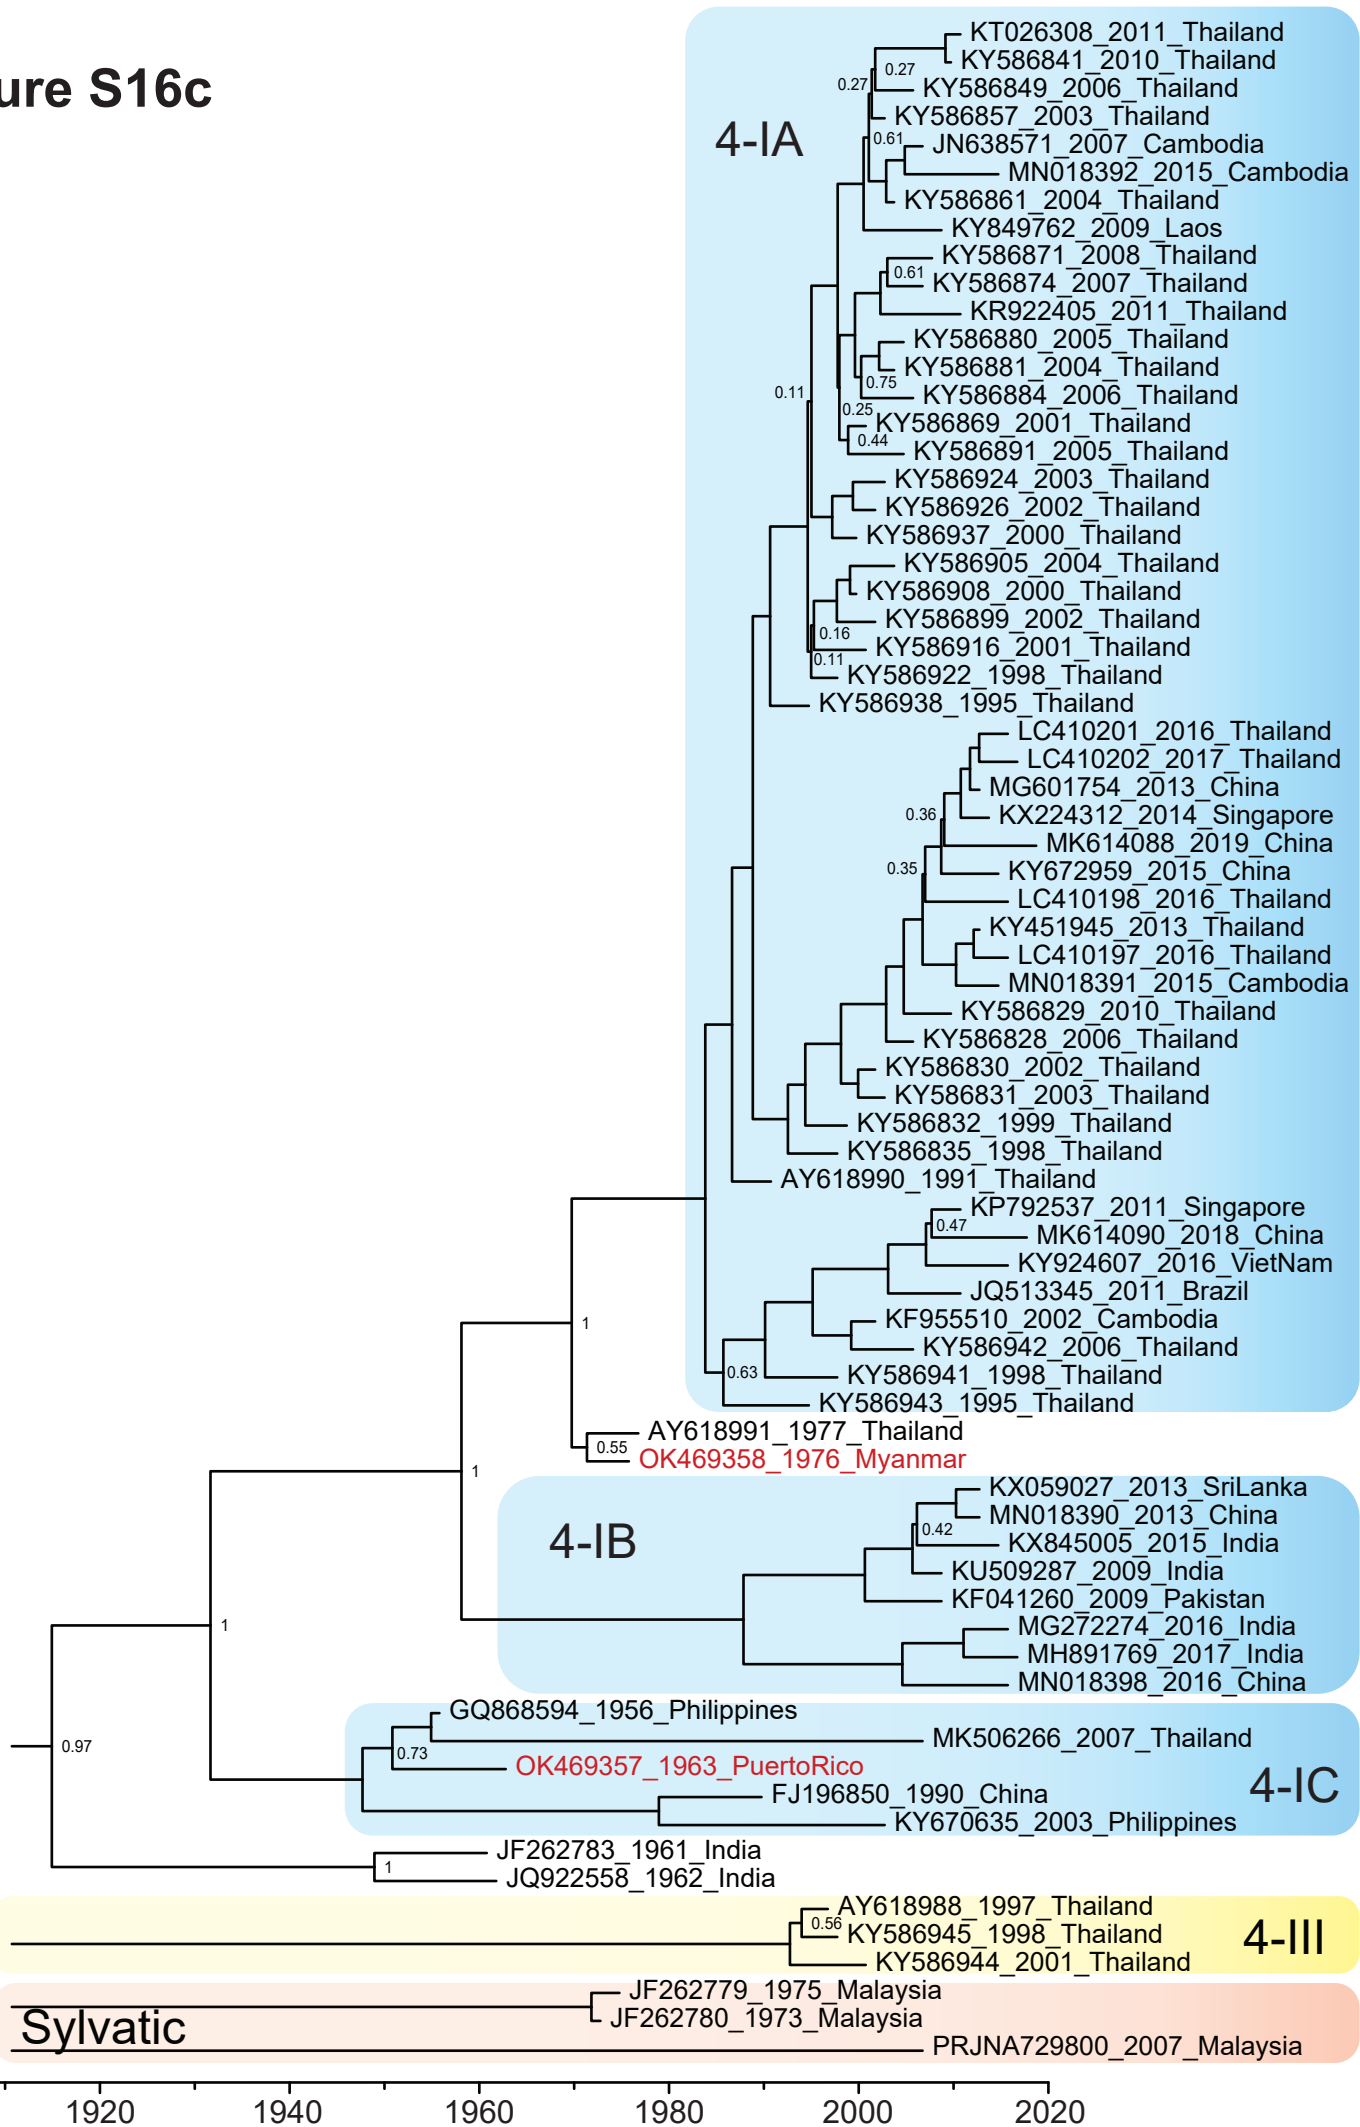

Supplement: s1 [file s1]
